# Supplementary material for: Frequent Drivers, Occasional Passengers: Signals of Symbiont-Driven Seasonal Adaptation and Hitchhiking in the Pea Aphid, Acyrthosiphon pisum
Source: Insects. 2021 Sep 8;12(9):805. doi: 10.3390/insects12090805 (PMC8466206; doi:10.3390/insects12090805)
Supplement: Supplementary file 1 [file insects-12-00805-s001.zip › Supplementary/Supplementary Tables v6 - july 30.xlsx]

## Sheet: Table S1-ApidClxnSymPCRBuchIbpA
Table S1: aphid collection data, symbiont PCR screening, and Buchnera ibpA promoter genotyping results from our 2012 longitudinal field survey
															co-infections																						community types
Aphid sample ID	Collection Date	Field	Sampling #	Instar (developmental stage: 1-5)	Color	Wings?	Hamiltonella defensa	Regiella insecticola	Serratia symbiotica	Rickettsia sp.	Fukatsuia (X-type)	Rickettsiella viridis	Spiroplasma	Buchnera ibpA promoter length	Hd-Reg	Hd-Ser	Hd-Rick	Hd-Fuka (X)	Hd-Rkla	Hd-Spi	Reg-Ser	Reg-Rick	Reg-Fuka (X)	Reg-Rkla	Reg-Spi	Ser-Rick	Ser-Fuka (X)	Ser-Rkla	Ser-Spi	Rick-Fuka (X)	Rick-Rkla	Rick-Spi	Fuka (X)-Rkla	Fuka (X)-Spi	Rkla-Spi	total # of syms	uninfected	Hd alone	Reg alone	Ser alone	Rick alone	Fukatsuia (X-type) alone	Rkla alone	Spi alone
K1-20	2012-04-25	KU1	1	4	Green	Apterous	0	0	1	0	0	1	0		0	0	0	0	0	0	0	0	0	0	0	0	0	1	0	0	0	0	0	0	0	2	0	0	0	0	0	0	0	0
K1-22	2012-04-25	KU1	1	4	Green	Apterous	0	0	0	0	0	1	0		0	0	0	0	0	0	0	0	0	0	0	0	0	0	0	0	0	0	0	0	0	1	0	0	0	0	0	0	1	0
K1-24	2012-04-25	KU1	1	4	Green	Apterous	0	0	1	0	0	1	0		0	0	0	0	0	0	0	0	0	0	0	0	0	1	0	0	0	0	0	0	0	2	0	0	0	0	0	0	0	0
K1-29	2012-04-25	KU1	1	3	Green	Apterous	0	0	1	0	0	1	0		0	0	0	0	0	0	0	0	0	0	0	0	0	1	0	0	0	0	0	0	0	2	0	0	0	0	0	0	0	0
K1-31	2012-04-25	KU1	1	3	Green	Apterous	0	0	1	0	0	1	0		0	0	0	0	0	0	0	0	0	0	0	0	0	1	0	0	0	0	0	0	0	2	0	0	0	0	0	0	0	0
K1-32	2012-04-25	KU1	1	3	Green	Apterous	1	0	1	0	0	1	0		0	1	0	0	1	0	0	0	0	0	0	0	0	1	0	0	0	0	0	0	0	3	0	0	0	0	0	0	0	0
K1-34	2012-04-25	KU1	1	5	Red	Apterous	0	0	1	0	0	1	0		0	0	0	0	0	0	0	0	0	0	0	0	0	1	0	0	0	0	0	0	0	2	0	0	0	0	0	0	0	0
K1-8	2012-04-25	KU1	1	5	Green	Alate	0	0	1	0	0	1	0		0	0	0	0	0	0	0	0	0	0	0	0	0	1	0	0	0	0	0	0	0	2	0	0	0	0	0	0	0	0
K1-1	2012-04-25	KU1	1	5	Green	Alate	0	0	1	0	0	1	0		0	0	0	0	0	0	0	0	0	0	0	0	0	1	0	0	0	0	0	0	0	2	0	0	0	0	0	0	0	0
K1-10	2012-04-25	KU1	1	5	Green	Apterous	0	0	0	0	0	0	0		0	0	0	0	0	0	0	0	0	0	0	0	0	0	0	0	0	0	0	0	0	0	1	0	0	0	0	0	0	0
K1-11	2012-04-25	KU1	1	5	Green	Apterous	1	0	0	0	0	0	0		0	0	0	0	0	0	0	0	0	0	0	0	0	0	0	0	0	0	0	0	0	1	0	1	0	0	0	0	0	0
K1-12	2012-04-25	KU1	1	5	Green	Alate	1	0	0	0	0	0	0		0	0	0	0	0	0	0	0	0	0	0	0	0	0	0	0	0	0	0	0	0	1	0	1	0	0	0	0	0	0
K1-13	2012-04-25	KU1	1	5	Green	Apterous	1	0	1	0	0	0	0		0	1	0	0	0	0	0	0	0	0	0	0	0	0	0	0	0	0	0	0	0	2	0	0	0	0	0	0	0	0
K1-14	2012-04-25	KU1	1	4	Green	Apterous	0	0	1	0	0	1	0		0	0	0	0	0	0	0	0	0	0	0	0	0	1	0	0	0	0	0	0	0	2	0	0	0	0	0	0	0	0
K1-15	2012-04-25	KU1	1	4	Green	Apterous	0	0	0	0	0	0	0		0	0	0	0	0	0	0	0	0	0	0	0	0	0	0	0	0	0	0	0	0	0	1	0	0	0	0	0	0	0
K1-16	2012-04-25	KU1	1	4	Green	Apterous	1	0	0	0	0	0	0		0	0	0	0	0	0	0	0	0	0	0	0	0	0	0	0	0	0	0	0	0	1	0	1	0	0	0	0	0	0
K1-17	2012-04-25	KU1	1	4	Green	Apterous	0	0	0	0	0	0	0		0	0	0	0	0	0	0	0	0	0	0	0	0	0	0	0	0	0	0	0	0	0	1	0	0	0	0	0	0	0
K1-18	2012-04-25	KU1	1	4	Green	Apterous	0	0	0	0	0	0	0		0	0	0	0	0	0	0	0	0	0	0	0	0	0	0	0	0	0	0	0	0	0	1	0	0	0	0	0	0	0
K1-19	2012-04-25	KU1	1	4	Green	Apterous	0	0	0	0	0	0	0		0	0	0	0	0	0	0	0	0	0	0	0	0	0	0	0	0	0	0	0	0	0	1	0	0	0	0	0	0	0
K1-2	2012-04-25	KU1	1	5	Green	Apterous	0	0	0	0	0	0	0		0	0	0	0	0	0	0	0	0	0	0	0	0	0	0	0	0	0	0	0	0	0	1	0	0	0	0	0	0	0
K1-21	2012-04-25	KU1	1	4	Green	Apterous	0	0	0	0	0	0	0		0	0	0	0	0	0	0	0	0	0	0	0	0	0	0	0	0	0	0	0	0	0	1	0	0	0	0	0	0	0
K1-23	2012-04-25	KU1	1	4	Green	Apterous	0	0	0	0	0	0	0		0	0	0	0	0	0	0	0	0	0	0	0	0	0	0	0	0	0	0	0	0	0	1	0	0	0	0	0	0	0
K1-25	2012-04-25	KU1	1	4	Green	Apterous	0	0	0	0	0	0	0		0	0	0	0	0	0	0	0	0	0	0	0	0	0	0	0	0	0	0	0	0	0	1	0	0	0	0	0	0	0
K1-26	2012-04-25	KU1	1	4	Green	Apterous	0	0	0	0	0	0	0		0	0	0	0	0	0	0	0	0	0	0	0	0	0	0	0	0	0	0	0	0	0	1	0	0	0	0	0	0	0
K1-27	2012-04-25	KU1	1	4	Green	Apterous	1	0	0	0	0	0	0		0	0	0	0	0	0	0	0	0	0	0	0	0	0	0	0	0	0	0	0	0	1	0	1	0	0	0	0	0	0
K1-28	2012-04-25	KU1	1	4	Green	Apterous	0	0	0	0	0	0	0		0	0	0	0	0	0	0	0	0	0	0	0	0	0	0	0	0	0	0	0	0	0	1	0	0	0	0	0	0	0
K1-3	2012-04-25	KU1	1	5	Green	Alate	0	0	0	0	0	0	1		0	0	0	0	0	0	0	0	0	0	0	0	0	0	0	0	0	0	0	0	0	1	0	0	0	0	0	0	0	1
K1-30	2012-04-25	KU1	1	3	Green	Apterous	1	0	0	0	0	0	0		0	0	0	0	0	0	0	0	0	0	0	0	0	0	0	0	0	0	0	0	0	1	0	1	0	0	0	0	0	0
K1-33	2012-04-25	KU1	1	5	Red	Apterous	0	0	0	0	0	0	0		0	0	0	0	0	0	0	0	0	0	0	0	0	0	0	0	0	0	0	0	0	0	1	0	0	0	0	0	0	0
K1-35	2012-04-25	KU1	1	5	Red	Apterous	1	0	0	0	0	0	0		0	0	0	0	0	0	0	0	0	0	0	0	0	0	0	0	0	0	0	0	0	1	0	1	0	0	0	0	0	0
K1-37	2012-04-25	KU1	1	5	Red	Apterous	0	0	0	0	0	0	0		0	0	0	0	0	0	0	0	0	0	0	0	0	0	0	0	0	0	0	0	0	0	1	0	0	0	0	0	0	0
K1-38	2012-04-25	KU1	1	4	Red	Apterous	1	0	0	0	0	0	0		0	0	0	0	0	0	0	0	0	0	0	0	0	0	0	0	0	0	0	0	0	1	0	1	0	0	0	0	0	0
K1-39	2012-04-25	KU1	1	4	Red	Apterous	1	0	0	0	0	0	0		0	0	0	0	0	0	0	0	0	0	0	0	0	0	0	0	0	0	0	0	0	1	0	1	0	0	0	0	0	0
K1-4	2012-04-25	KU1	1	5	Green	Alate	1	0	0	1	0	0	0		0	0	1	0	0	0	0	0	0	0	0	0	0	0	0	0	0	0	0	0	0	2	0	0	0	0	0	0	0	0
K1-5	2012-04-25	KU1	1	5	Green	Apterous	0	0	0	0	0	0	0		0	0	0	0	0	0	0	0	0	0	0	0	0	0	0	0	0	0	0	0	0	0	1	0	0	0	0	0	0	0
K1-6	2012-04-25	KU1	1	5	Green	Alate	0	1	0	0	0	0	0		0	0	0	0	0	0	0	0	0	0	0	0	0	0	0	0	0	0	0	0	0	1	0	0	1	0	0	0	0	0
K1-7	2012-04-25	KU1	1	5	Green	Alate	0	0	0	0	0	0	0		0	0	0	0	0	0	0	0	0	0	0	0	0	0	0	0	0	0	0	0	0	0	1	0	0	0	0	0	0	0
K1-9	2012-04-25	KU1	1	5	Green	Alate	0	1	0	0	0	0	0		0	0	0	0	0	0	0	0	0	0	0	0	0	0	0	0	0	0	0	0	0	1	0	0	1	0	0	0	0	0
K1-36	2012-04-25	KU1	1	5	Red	Alate	0	1	0	0	0	0	0		0	0	0	0	0	0	0	0	0	0	0	0	0	0	0	0	0	0	0	0	0	1	0	0	1	0	0	0	0	0
K2-1	2012-04-25	KU2	1	5	Green	Apterous	0	0	0	0	0	1	0		0	0	0	0	0	0	0	0	0	0	0	0	0	0	0	0	0	0	0	0	0	1	0	0	0	0	0	0	1	0
K2-11	2012-04-25	KU2	1	4	Green	Apterous	0	0	1	0	0	1	0		0	0	0	0	0	0	0	0	0	0	0	0	0	1	0	0	0	0	0	0	0	2	0	0	0	0	0	0	0	0
K2-12	2012-04-25	KU2	1	4	Green	Apterous	0	0	0	1	0	1	0		0	0	0	0	0	0	0	0	0	0	0	0	0	0	0	0	1	0	0	0	0	2	0	0	0	0	0	0	0	0
K2-17	2012-04-25	KU2	1	4	Green	Apterous	0	0	1	0	0	1	0		0	0	0	0	0	0	0	0	0	0	0	0	0	1	0	0	0	0	0	0	0	2	0	0	0	0	0	0	0	0
K2-20	2012-04-25	KU2	1	4	Green	Apterous	0	0	0	0	0	1	0		0	0	0	0	0	0	0	0	0	0	0	0	0	0	0	0	0	0	0	0	0	1	0	0	0	0	0	0	1	0
K2-21	2012-04-25	KU2	1	3	Green	Apterous	0	0	1	0	0	1	0		0	0	0	0	0	0	0	0	0	0	0	0	0	1	0	0	0	0	0	0	0	2	0	0	0	0	0	0	0	0
K2-24	2012-04-25	KU2	1	5	Red	Apterous	1	0	0	0	1	1	0		0	0	0	1	1	0	0	0	0	0	0	0	0	0	0	0	0	0	1	0	0	3	0	0	0	0	0	0	0	0
K2-42	2012-04-25	KU2	1	3	Red	Apterous	1	0	0	0	0	1	0		0	0	0	0	1	0	0	0	0	0	0	0	0	0	0	0	0	0	0	0	0	2	0	0	0	0	0	0	0	0
K2-7	2012-04-25	KU2	1	4	Green	Apterous	0	0	1	1	0	1	0		0	0	0	0	0	0	0	0	0	0	0	1	0	1	0	0	1	0	0	0	0	3	0	0	0	0	0	0	0	0
K2-8	2012-04-25	KU2	1	4	Green	Apterous	0	0	1	1	0	1	0		0	0	0	0	0	0	0	0	0	0	0	1	0	1	0	0	1	0	0	0	0	3	0	0	0	0	0	0	0	0
K2-9	2012-04-25	KU2	1	4	Green	Apterous	0	0	1	1	0	1	0		0	0	0	0	0	0	0	0	0	0	0	1	0	1	0	0	1	0	0	0	0	3	0	0	0	0	0	0	0	0
K2-10	2012-04-25	KU2	1	4	Green	Apterous	0	0	0	0	0	0	0		0	0	0	0	0	0	0	0	0	0	0	0	0	0	0	0	0	0	0	0	0	0	1	0	0	0	0	0	0	0
K2-13	2012-04-25	KU2	1	4	Green	Apterous	0	0	0	0	0	0	0		0	0	0	0	0	0	0	0	0	0	0	0	0	0	0	0	0	0	0	0	0	0	1	0	0	0	0	0	0	0
K2-14	2012-04-25	KU2	1	4	Green	Apterous	1	0	0	0	0	0	0		0	0	0	0	0	0	0	0	0	0	0	0	0	0	0	0	0	0	0	0	0	1	0	1	0	0	0	0	0	0
K2-15	2012-04-25	KU2	1	4	Green	Apterous	0	0	0	1	0	0	0		0	0	0	0	0	0	0	0	0	0	0	0	0	0	0	0	0	0	0	0	0	1	0	0	0	0	1	0	0	0
K2-16	2012-04-25	KU2	1	4	Green	Apterous	1	0	0	0	0	0	0		0	0	0	0	0	0	0	0	0	0	0	0	0	0	0	0	0	0	0	0	0	1	0	1	0	0	0	0	0	0
K2-18	2012-04-25	KU2	1	4	Green	Apterous	0	0	0	0	0	0	0		0	0	0	0	0	0	0	0	0	0	0	0	0	0	0	0	0	0	0	0	0	0	1	0	0	0	0	0	0	0
K2-19	2012-04-25	KU2	1	4	Green	Apterous	1	0	0	0	0	0	0		0	0	0	0	0	0	0	0	0	0	0	0	0	0	0	0	0	0	0	0	0	1	0	1	0	0	0	0	0	0
K2-2	2012-04-25	KU2	1	5	Green	Apterous	0	0	0	0	0	0	0		0	0	0	0	0	0	0	0	0	0	0	0	0	0	0	0	0	0	0	0	0	0	1	0	0	0	0	0	0	0
K2-22	2012-04-25	KU2	1	3	Green	Apterous	0	0	0	0	0	0	0		0	0	0	0	0	0	0	0	0	0	0	0	0	0	0	0	0	0	0	0	0	0	1	0	0	0	0	0	0	0
K2-23	2012-04-25	KU2	1	5	Red	Alate	1	0	0	0	0	0	0		0	0	0	0	0	0	0	0	0	0	0	0	0	0	0	0	0	0	0	0	0	1	0	1	0	0	0	0	0	0
K2-25	2012-04-25	KU2	1	5	Red	Apterous	1	0	0	0	0	0	0		0	0	0	0	0	0	0	0	0	0	0	0	0	0	0	0	0	0	0	0	0	1	0	1	0	0	0	0	0	0
K2-27	2012-04-25	KU2	1	5	Red	Alate	1	0	0	0	0	0	0		0	0	0	0	0	0	0	0	0	0	0	0	0	0	0	0	0	0	0	0	0	1	0	1	0	0	0	0	0	0
K2-28	2012-04-25	KU2	1	5	Red	Apterous	1	0	0	0	0	0	0		0	0	0	0	0	0	0	0	0	0	0	0	0	0	0	0	0	0	0	0	0	1	0	1	0	0	0	0	0	0
K2-29	2012-04-25	KU2	1	5	Red	Apterous	1	0	0	0	0	0	1		0	0	0	0	0	1	0	0	0	0	0	0	0	0	0	0	0	0	0	0	0	2	0	0	0	0	0	0	0	0
K2-3	2012-04-25	KU2	1	5	Green	Apterous	0	0	1	0	0	0	0		0	0	0	0	0	0	0	0	0	0	0	0	0	0	0	0	0	0	0	0	0	1	0	0	0	1	0	0	0	0
K2-30	2012-04-25	KU2	1	5	Red	Apterous	1	0	0	0	1	0	0		0	0	0	1	0	0	0	0	0	0	0	0	0	0	0	0	0	0	0	0	0	2	0	0	0	0	0	0	0	0
K2-31	2012-04-25	KU2	1	4	Red	Apterous	0	0	1	0	0	0	0		0	0	0	0	0	0	0	0	0	0	0	0	0	0	0	0	0	0	0	0	0	1	0	0	0	1	0	0	0	0
K2-32	2012-04-25	KU2	1	4	Red	Apterous	1	0	0	0	1	0	0		0	0	0	1	0	0	0	0	0	0	0	0	0	0	0	0	0	0	0	0	0	2	0	0	0	0	0	0	0	0
K2-33	2012-04-25	KU2	1	4	Red	Apterous	1	0	0	0	0	0	0		0	0	0	0	0	0	0	0	0	0	0	0	0	0	0	0	0	0	0	0	0	1	0	1	0	0	0	0	0	0
K2-34	2012-04-25	KU2	1	4	Red	Apterous	1	0	0	1	0	0	0		0	0	1	0	0	0	0	0	0	0	0	0	0	0	0	0	0	0	0	0	0	2	0	0	0	0	0	0	0	0
K2-35	2012-04-25	KU2	1	4	Red	Apterous	1	0	0	1	0	0	0		0	0	1	0	0	0	0	0	0	0	0	0	0	0	0	0	0	0	0	0	0	2	0	0	0	0	0	0	0	0
K2-36	2012-04-25	KU2	1	4	Red	Apterous	1	0	0	0	0	0	0		0	0	0	0	0	0	0	0	0	0	0	0	0	0	0	0	0	0	0	0	0	1	0	1	0	0	0	0	0	0
K2-37	2012-04-25	KU2	1	4	Red	Apterous	0	0	0	0	0	0	0		0	0	0	0	0	0	0	0	0	0	0	0	0	0	0	0	0	0	0	0	0	0	1	0	0	0	0	0	0	0
K2-38	2012-04-25	KU2	1	4	Red	Apterous	1	0	0	0	0	0	0		0	0	0	0	0	0	0	0	0	0	0	0	0	0	0	0	0	0	0	0	0	1	0	1	0	0	0	0	0	0
K2-40	2012-04-25	KU2	1	3	Red	Apterous	1	0	0	0	0	0	0		0	0	0	0	0	0	0	0	0	0	0	0	0	0	0	0	0	0	0	0	0	1	0	1	0	0	0	0	0	0
K2-41	2012-04-25	KU2	1	3	Red	Apterous	1	0	0	0	1	0	0		0	0	0	1	0	0	0	0	0	0	0	0	0	0	0	0	0	0	0	0	0	2	0	0	0	0	0	0	0	0
K2-43	2012-04-25	KU2	1	3	Red	Apterous	1	0	0	0	0	0	0		0	0	0	0	0	0	0	0	0	0	0	0	0	0	0	0	0	0	0	0	0	1	0	1	0	0	0	0	0	0
K2-5	2012-04-25	KU2	1	5	Green	Apterous	0	0	0	0	0	0	0		0	0	0	0	0	0	0	0	0	0	0	0	0	0	0	0	0	0	0	0	0	0	1	0	0	0	0	0	0	0
K2-4	2012-04-25	KU2	1	5	Green	Apterous	1	0	0	0	0	0	0		0	0	0	0	0	0	0	0	0	0	0	0	0	0	0	0	0	0	0	0	0	1	0	1	0	0	0	0	0	0
K2-6	2012-04-25	KU2	1	5	Green	Apterous	1	0	0	0	0	0	0		0	0	0	0	0	0	0	0	0	0	0	0	0	0	0	0	0	0	0	0	0	1	0	1	0	0	0	0	0	0
K3-24	2012-04-25	KU3	1	5	Red	Alate	1	0	0	0	0	1	0		0	0	0	0	1	0	0	0	0	0	0	0	0	0	0	0	0	0	0	0	0	2	0	0	0	0	0	0	0	0
K3-28	2012-04-25	KU3	1	5	Red	Apterous	1	0	0	0	1	1	0		0	0	0	1	1	0	0	0	0	0	0	0	0	0	0	0	0	0	1	0	0	3	0	0	0	0	0	0	0	0
K3-4	2012-04-25	KU3	1	5	Green	Alate	0	1	0	0	0	1	0		0	0	0	0	0	0	0	0	0	1	0	0	0	0	0	0	0	0	0	0	0	2	0	0	0	0	0	0	0	0
K3-1	2012-04-25	KU3	1	5	Green	Apterous	0	0	0	0	0	0	0		0	0	0	0	0	0	0	0	0	0	0	0	0	0	0	0	0	0	0	0	0	0	1	0	0	0	0	0	0	0
K3-10	2012-04-25	KU3	1	5	Green	Apterous	0	0	0	0	0	0	0		0	0	0	0	0	0	0	0	0	0	0	0	0	0	0	0	0	0	0	0	0	0	1	0	0	0	0	0	0	0
K3-11	2012-04-25	KU3	1	5	Green	Apterous	1	1	0	0	0	0	0		1	0	0	0	0	0	0	0	0	0	0	0	0	0	0	0	0	0	0	0	0	2	0	0	0	0	0	0	0	0
K3-12	2012-04-25	KU3	1	5	Green	Apterous	0	0	0	0	0	0	0		0	0	0	0	0	0	0	0	0	0	0	0	0	0	0	0	0	0	0	0	0	0	1	0	0	0	0	0	0	0
K3-14	2012-04-25	KU3	1	5	Green	Apterous	1	0	0	1	0	0	0		0	0	1	0	0	0	0	0	0	0	0	0	0	0	0	0	0	0	0	0	0	2	0	0	0	0	0	0	0	0
K3-17	2012-04-25	KU3	1	4	Green	Apterous	1	0	0	0	0	0	0		0	0	0	0	0	0	0	0	0	0	0	0	0	0	0	0	0	0	0	0	0	1	0	1	0	0	0	0	0	0
K3-2	2012-04-25	KU3	1	5	Green	Apterous	0	0	0	0	0	0	0		0	0	0	0	0	0	0	0	0	0	0	0	0	0	0	0	0	0	0	0	0	0	1	0	0	0	0	0	0	0
K3-20	2012-04-25	KU3	1	5	Red	Apterous	0	0	0	0	0	0	0		0	0	0	0	0	0	0	0	0	0	0	0	0	0	0	0	0	0	0	0	0	0	1	0	0	0	0	0	0	0
K3-22	2012-04-25	KU3	1	5	Red	Apterous	0	0	1	0	0	0	0		0	0	0	0	0	0	0	0	0	0	0	0	0	0	0	0	0	0	0	0	0	1	0	0	0	1	0	0	0	0
K3-23	2012-04-25	KU3	1	5	Red	Apterous	0	0	0	0	0	0	0		0	0	0	0	0	0	0	0	0	0	0	0	0	0	0	0	0	0	0	0	0	0	1	0	0	0	0	0	0	0
K3-25	2012-04-25	KU3	1	5	Red	Apterous	0	0	0	0	0	0	1		0	0	0	0	0	0	0	0	0	0	0	0	0	0	0	0	0	0	0	0	0	1	0	0	0	0	0	0	0	1
K3-26	2012-04-25	KU3	1	5	Red	Apterous	0	0	0	0	0	0	1		0	0	0	0	0	0	0	0	0	0	0	0	0	0	0	0	0	0	0	0	0	1	0	0	0	0	0	0	0	1
K3-27	2012-04-25	KU3	1	5	Red	Apterous	0	0	0	0	0	0	1		0	0	0	0	0	0	0	0	0	0	0	0	0	0	0	0	0	0	0	0	0	1	0	0	0	0	0	0	0	1
K3-29	2012-04-25	KU3	1	5	Red	Alate	0	0	0	0	0	0	1		0	0	0	0	0	0	0	0	0	0	0	0	0	0	0	0	0	0	0	0	0	1	0	0	0	0	0	0	0	1
K3-30	2012-04-25	KU3	1	5	Red	Apterous	0	0	1	0	0	0	0		0	0	0	0	0	0	0	0	0	0	0	0	0	0	0	0	0	0	0	0	0	1	0	0	0	1	0	0	0	0
K3-31	2012-04-25	KU3	1	5	Red	Alate	0	0	0	0	0	0	0		0	0	0	0	0	0	0	0	0	0	0	0	0	0	0	0	0	0	0	0	0	0	1	0	0	0	0	0	0	0
K3-32	2012-04-25	KU3	1	5	Red	Alate	1	0	0	0	0	0	0		0	0	0	0	0	0	0	0	0	0	0	0	0	0	0	0	0	0	0	0	0	1	0	1	0	0	0	0	0	0
K3-33	2012-04-25	KU3	1	5	Red	Apterous	0	0	0	0	0	0	1		0	0	0	0	0	0	0	0	0	0	0	0	0	0	0	0	0	0	0	0	0	1	0	0	0	0	0	0	0	1
K3-34	2012-04-25	KU3	1	5	Red	Apterous	0	1	0	0	0	0	0		0	0	0	0	0	0	0	0	0	0	0	0	0	0	0	0	0	0	0	0	0	1	0	0	1	0	0	0	0	0
K3-35	2012-04-25	KU3	1	5	Red	Apterous	1	0	0	0	0	0	0		0	0	0	0	0	0	0	0	0	0	0	0	0	0	0	0	0	0	0	0	0	1	0	1	0	0	0	0	0	0
K3-36	2012-04-25	KU3	1	4	Red	Apterous	1	0	0	0	0	0	0		0	0	0	0	0	0	0	0	0	0	0	0	0	0	0	0	0	0	0	0	0	1	0	1	0	0	0	0	0	0
K3-37	2012-04-25	KU3	1	4	Red	Apterous	0	1	0	0	0	0	1		0	0	0	0	0	0	0	0	0	0	1	0	0	0	0	0	0	0	0	0	0	2	0	0	0	0	0	0	0	0
K3-38	2012-04-25	KU3	1	4	Red	Apterous	1	1	0	0	0	0	0		1	0	0	0	0	0	0	0	0	0	0	0	0	0	0	0	0	0	0	0	0	2	0	0	0	0	0	0	0	0
K3-39	2012-04-25	KU3	1	4	Red	Apterous	0	1	0	0	0	0	0		0	0	0	0	0	0	0	0	0	0	0	0	0	0	0	0	0	0	0	0	0	1	0	0	1	0	0	0	0	0
K3-40	2012-04-25	KU3	1	4	Red	Apterous	1	0	0	0	0	0	0		0	0	0	0	0	0	0	0	0	0	0	0	0	0	0	0	0	0	0	0	0	1	0	1	0	0	0	0	0	0
K3-5	2012-04-25	KU3	1	5	Green	Apterous	0	0	0	0	0	0	0		0	0	0	0	0	0	0	0	0	0	0	0	0	0	0	0	0	0	0	0	0	0	1	0	0	0	0	0	0	0
K3-8	2012-04-25	KU3	1	5	Green	Apterous	0	0	0	0	0	0	0		0	0	0	0	0	0	0	0	0	0	0	0	0	0	0	0	0	0	0	0	0	0	1	0	0	0	0	0	0	0
K3-9	2012-04-25	KU3	1	5	Green	Apterous	0	0	0	1	0	0	0		0	0	0	0	0	0	0	0	0	0	0	0	0	0	0	0	0	0	0	0	0	1	0	0	0	0	1	0	0	0
K3-13	2012-04-25	KU3	1	5	Green	Apterous	0	0	0	1	0	0	0		0	0	0	0	0	0	0	0	0	0	0	0	0	0	0	0	0	0	0	0	0	1	0	0	0	0	1	0	0	0
K3-42	2012-04-25	KU3	1	4	Red	Apterous	0	0	0	1	0	0	0		0	0	0	0	0	0	0	0	0	0	0	0	0	0	0	0	0	0	0	0	0	1	0	0	0	0	1	0	0	0
K4-12	2012-04-25	KU4	1	4	Red	Apterous	1	0	0	0	0	1	0		0	0	0	0	1	0	0	0	0	0	0	0	0	0	0	0	0	0	0	0	0	2	0	0	0	0	0	0	0	0
K4-18	2012-04-25	KU4	1	5	Green	Apterous	0	0	0	0	0	1	0		0	0	0	0	0	0	0	0	0	0	0	0	0	0	0	0	0	0	0	0	0	1	0	0	0	0	0	0	1	0
K4-20	2012-04-25	KU4	1	5	Green	Apterous	1	0	0	0	0	1	0		0	0	0	0	1	0	0	0	0	0	0	0	0	0	0	0	0	0	0	0	0	2	0	0	0	0	0	0	0	0
K4-24	2012-04-25	KU4	1	5	Green	Apterous	1	0	0	0	0	1	0		0	0	0	0	1	0	0	0	0	0	0	0	0	0	0	0	0	0	0	0	0	2	0	0	0	0	0	0	0	0
K4-1	2012-04-25	KU4	1	5	Red	Alate	0	0	0	0	0	0	0		0	0	0	0	0	0	0	0	0	0	0	0	0	0	0	0	0	0	0	0	0	0	1	0	0	0	0	0	0	0
K4-10	2012-04-25	KU4	1	4	Red	Apterous	0	0	0	0	0	0	0		0	0	0	0	0	0	0	0	0	0	0	0	0	0	0	0	0	0	0	0	0	0	1	0	0	0	0	0	0	0
K4-13	2012-04-25	KU4	1	5	Green	Alate	0	0	0	0	0	0	0		0	0	0	0	0	0	0	0	0	0	0	0	0	0	0	0	0	0	0	0	0	0	1	0	0	0	0	0	0	0
K4-14	2012-04-25	KU4	1	5	Green	Apterous	0	0	0	0	0	0	0		0	0	0	0	0	0	0	0	0	0	0	0	0	0	0	0	0	0	0	0	0	0	1	0	0	0	0	0	0	0
K4-15	2012-04-25	KU4	1	5	Green	Apterous	0	0	0	0	0	0	0		0	0	0	0	0	0	0	0	0	0	0	0	0	0	0	0	0	0	0	0	0	0	1	0	0	0	0	0	0	0
K4-16	2012-04-25	KU4	1	5	Green	Apterous	0	0	0	0	0	0	0		0	0	0	0	0	0	0	0	0	0	0	0	0	0	0	0	0	0	0	0	0	0	1	0	0	0	0	0	0	0
K4-2	2012-04-25	KU4	1	5	Red	Alate	1	0	0	0	0	0	1		0	0	0	0	0	1	0	0	0	0	0	0	0	0	0	0	0	0	0	0	0	2	0	0	0	0	0	0	0	0
K4-21	2012-04-25	KU4	1	5	Green	Apterous	0	0	0	0	0	0	0		0	0	0	0	0	0	0	0	0	0	0	0	0	0	0	0	0	0	0	0	0	0	1	0	0	0	0	0	0	0
K4-23	2012-04-25	KU4	1	5	Green	Apterous	1	0	0	0	0	0	0		0	0	0	0	0	0	0	0	0	0	0	0	0	0	0	0	0	0	0	0	0	1	0	1	0	0	0	0	0	0
K4-3	2012-04-25	KU4	1	5	Red	Apterous	1	0	0	1	0	1	0		0	0	1	0	1	0	0	0	0	0	0	0	0	0	0	0	1	0	0	0	0	3	0	0	0	0	0	0	0	0
K4-4	2012-04-25	KU4	1	5	Red	Apterous	0	1	0	0	0	0	1		0	0	0	0	0	0	0	0	0	0	1	0	0	0	0	0	0	0	0	0	0	2	0	0	0	0	0	0	0	0
K4-5	2012-04-25	KU4	1	5	Red	Alate	1	0	0	0	0	0	0		0	0	0	0	0	0	0	0	0	0	0	0	0	0	0	0	0	0	0	0	0	1	0	1	0	0	0	0	0	0
K4-6	2012-04-25	KU4	1	5	Red	Apterous	0	0	0	0	0	0	0		0	0	0	0	0	0	0	0	0	0	0	0	0	0	0	0	0	0	0	0	0	0	1	0	0	0	0	0	0	0
K4-8	2012-04-25	KU4	1	5	Red	Apterous	0	0	0	0	0	0	0		0	0	0	0	0	0	0	0	0	0	0	0	0	0	0	0	0	0	0	0	0	0	1	0	0	0	0	0	0	0
K4-9	2012-04-25	KU4	1	5	Red	Apterous	0	0	0	0	0	0	0		0	0	0	0	0	0	0	0	0	0	0	0	0	0	0	0	0	0	0	0	0	0	1	0	0	0	0	0	0	0
K4-11	2012-04-25	KU4	1	4	Red	Apterous	1	0	0	1	0	0	0		0	0	1	0	0	0	0	0	0	0	0	0	0	0	0	0	0	0	0	0	0	2	0	0	0	0	0	0	0	0
K4-17	2012-04-25	KU4	1	5	Green	Apterous	1	1	0	1	0	0	0		1	0	1	0	0	0	0	1	0	0	0	0	0	0	0	0	0	0	0	0	0	3	0	0	0	0	0	0	0	0
K4-22	2012-04-25	KU4	1	5	Green	Apterous	1	0	0	1	0	0	0		0	0	1	0	0	0	0	0	0	0	0	0	0	0	0	0	0	0	0	0	0	2	0	0	0	0	0	0	0	0
K4-7	2012-04-25	KU4	1	5	Red	Apterous	0	0	0	0	0	0	0		0	0	0	0	0	0	0	0	0	0	0	0	0	0	0	0	0	0	0	0	0	0	1	0	0	0	0	0	0	0
K5-11	2012-04-25	KU5	1	4	Red	Apterous	1	0	0	0	1	0	0		0	0	0	1	0	0	0	0	0	0	0	0	0	0	0	0	0	0	0	0	0	2	0	0	0	0	0	0	0	0
K5-22	2012-04-25	KU5	1	5	Green	Apterous	0	0	0	0	0	1	0		0	0	0	0	0	0	0	0	0	0	0	0	0	0	0	0	0	0	0	0	0	1	0	0	0	0	0	0	1	0
K5-23	2012-04-25	KU5	1	4	Green	Apterous	0	0	0	0	0	1	0		0	0	0	0	0	0	0	0	0	0	0	0	0	0	0	0	0	0	0	0	0	1	0	0	0	0	0	0	1	0
K5-3	2012-04-25	KU5	1	5	Red	Apterous	0	1	0	0	0	1	0		0	0	0	0	0	0	0	0	0	1	0	0	0	0	0	0	0	0	0	0	0	2	0	0	0	0	0	0	0	0
K5-12	2012-04-25	KU5	1	4	Red	Apterous	1	0	0	0	0	0	0		0	0	0	0	0	0	0	0	0	0	0	0	0	0	0	0	0	0	0	0	0	1	0	1	0	0	0	0	0	0
K5-13	2012-04-25	KU5	1	5	Green	Alate	0	0	0	0	0	0	0		0	0	0	0	0	0	0	0	0	0	0	0	0	0	0	0	0	0	0	0	0	0	1	0	0	0	0	0	0	0
K5-14	2012-04-25	KU5	1	5	Green	Apterous	0	0	0	0	0	0	1		0	0	0	0	0	0	0	0	0	0	0	0	0	0	0	0	0	0	0	0	0	1	0	0	0	0	0	0	0	1
K5-16	2012-04-25	KU5	1	5	Green	Apterous	0	0	0	0	0	0	1		0	0	0	0	0	0	0	0	0	0	0	0	0	0	0	0	0	0	0	0	0	1	0	0	0	0	0	0	0	1
K5-17	2012-04-25	KU5	1	5	Green	Apterous	0	0	0	0	0	0	0		0	0	0	0	0	0	0	0	0	0	0	0	0	0	0	0	0	0	0	0	0	0	1	0	0	0	0	0	0	0
K5-18	2012-04-25	KU5	1	5	Green	Apterous	1	0	0	0	0	0	0		0	0	0	0	0	0	0	0	0	0	0	0	0	0	0	0	0	0	0	0	0	1	0	1	0	0	0	0	0	0
K5-19	2012-04-25	KU5	1	5	Green	Apterous	1	0	0	0	0	0	0		0	0	0	0	0	0	0	0	0	0	0	0	0	0	0	0	0	0	0	0	0	1	0	1	0	0	0	0	0	0
K5-2	2012-04-25	KU5	1	5	Red	Apterous	0	1	0	0	0	0	1		0	0	0	0	0	0	0	0	0	0	1	0	0	0	0	0	0	0	0	0	0	2	0	0	0	0	0	0	0	0
K5-20	2012-04-25	KU5	1	5	Green	Apterous	1	0	0	0	0	0	0		0	0	0	0	0	0	0	0	0	0	0	0	0	0	0	0	0	0	0	0	0	1	0	1	0	0	0	0	0	0
K5-21	2012-04-25	KU5	1	5	Green	Apterous	1	0	0	0	0	0	0		0	0	0	0	0	0	0	0	0	0	0	0	0	0	0	0	0	0	0	0	0	1	0	1	0	0	0	0	0	0
K5-24	2012-04-25	KU5	1	4	Green	Apterous	0	0	0	0	0	0	0		0	0	0	0	0	0	0	0	0	0	0	0	0	0	0	0	0	0	0	0	0	0	1	0	0	0	0	0	0	0
K5-5	2012-04-25	KU5	1	5	Red	Apterous	1	0	0	0	1	0	0		0	0	0	1	0	0	0	0	0	0	0	0	0	0	0	0	0	0	0	0	0	2	0	0	0	0	0	0	0	0
K5-6	2012-04-25	KU5	1	5	Red	Apterous	1	0	0	0	0	0	0		0	0	0	0	0	0	0	0	0	0	0	0	0	0	0	0	0	0	0	0	0	1	0	1	0	0	0	0	0	0
K5-7	2012-04-25	KU5	1	5	Red	Apterous	1	0	0	0	0	0	0		0	0	0	0	0	0	0	0	0	0	0	0	0	0	0	0	0	0	0	0	0	1	0	1	0	0	0	0	0	0
K5-8	2012-04-25	KU5	1	5	Red	Apterous	0	0	0	0	0	0	1		0	0	0	0	0	0	0	0	0	0	0	0	0	0	0	0	0	0	0	0	0	1	0	0	0	0	0	0	0	1
K5-9	2012-04-25	KU5	1	5	Red	Apterous	0	0	0	0	0	0	0		0	0	0	0	0	0	0	0	0	0	0	0	0	0	0	0	0	0	0	0	0	0	1	0	0	0	0	0	0	0
K5-1	2012-04-25	KU5	1	5	Red	Alate	1	1	0	1	0	0	0		1	0	1	0	0	0	0	1	0	0	0	0	0	0	0	0	0	0	0	0	0	3	0	0	0	0	0	0	0	0
K5-10	2012-04-25	KU5	1	4	Red	Apterous	1	0	0	0	0	0	0		0	0	0	0	0	0	0	0	0	0	0	0	0	0	0	0	0	0	0	0	0	1	0	1	0	0	0	0	0	0
K5-4	2012-04-25	KU5	1	5	Red	Apterous	1	0	0	0	0	0	0		0	0	0	0	0	0	0	0	0	0	0	0	0	0	0	0	0	0	0	0	0	1	0	1	0	0	0	0	0	0
K6-16	2012-04-25	KU6	1	5	Green	Apterous	1	0	0	0	0	1	0		0	0	0	0	1	0	0	0	0	0	0	0	0	0	0	0	0	0	0	0	0	2	0	0	0	0	0	0	0	0
K6-17	2012-04-25	KU6	1	5	Green	Apterous	0	0	0	0	0	1	0		0	0	0	0	0	0	0	0	0	0	0	0	0	0	0	0	0	0	0	0	0	1	0	0	0	0	0	0	1	0
K6-18	2012-04-25	KU6	1	5	Green	Apterous	0	0	0	0	0	1	0		0	0	0	0	0	0	0	0	0	0	0	0	0	0	0	0	0	0	0	0	0	1	0	0	0	0	0	0	1	0
K6-21	2012-04-25	KU6	1	5	Green	Apterous	0	0	0	0	0	1	0		0	0	0	0	0	0	0	0	0	0	0	0	0	0	0	0	0	0	0	0	0	1	0	0	0	0	0	0	1	0
K6-22	2012-04-25	KU6	1	5	Green	Apterous	0	0	0	0	0	1	0		0	0	0	0	0	0	0	0	0	0	0	0	0	0	0	0	0	0	0	0	0	1	0	0	0	0	0	0	1	0
K6-1	2012-04-25	KU6	1	5	Red	Apterous	0	0	0	0	0	0	1		0	0	0	0	0	0	0	0	0	0	0	0	0	0	0	0	0	0	0	0	0	1	0	0	0	0	0	0	0	1
K6-10	2012-04-25	KU6	1	4	Red	Apterous	0	0	0	0	0	0	0		0	0	0	0	0	0	0	0	0	0	0	0	0	0	0	0	0	0	0	0	0	0	1	0	0	0	0	0	0	0
K6-11	2012-04-25	KU6	1	4	Red	Apterous	1	0	0	0	0	0	0		0	0	0	0	0	0	0	0	0	0	0	0	0	0	0	0	0	0	0	0	0	1	0	1	0	0	0	0	0	0
K6-12	2012-04-25	KU6	1	4	Red	Apterous	1	0	0	0	0	0	0		0	0	0	0	0	0	0	0	0	0	0	0	0	0	0	0	0	0	0	0	0	1	0	1	0	0	0	0	0	0
K6-13	2012-04-25	KU6	1	5	Green	Alate	0	0	0	0	0	0	0		0	0	0	0	0	0	0	0	0	0	0	0	0	0	0	0	0	0	0	0	0	0	1	0	0	0	0	0	0	0
K6-14	2012-04-25	KU6	1	5	Green	Alate	1	0	0	0	1	0	0		0	0	0	1	0	0	0	0	0	0	0	0	0	0	0	0	0	0	0	0	0	2	0	0	0	0	0	0	0	0
K6-19	2012-04-25	KU6	1	5	Green	Apterous	0	0	0	0	0	0	0		0	0	0	0	0	0	0	0	0	0	0	0	0	0	0	0	0	0	0	0	0	0	1	0	0	0	0	0	0	0
K6-20	2012-04-25	KU6	1	5	Green	Apterous	0	0	0	0	0	0	1		0	0	0	0	0	0	0	0	0	0	0	0	0	0	0	0	0	0	0	0	0	1	0	0	0	0	0	0	0	1
K6-23	2012-04-25	KU6	1	5	Green	Apterous	0	0	0	0	0	0	0		0	0	0	0	0	0	0	0	0	0	0	0	0	0	0	0	0	0	0	0	0	0	1	0	0	0	0	0	0	0
K6-24	2012-04-25	KU6	1	5	Green	Apterous	0	0	0	0	0	1	0		0	0	0	0	0	0	0	0	0	0	0	0	0	0	0	0	0	0	0	0	0	1	0	0	0	0	0	0	1	0
K6-3	2012-04-25	KU6	1	5	Red	Apterous	1	0	0	0	0	0	0		0	0	0	0	0	0	0	0	0	0	0	0	0	0	0	0	0	0	0	0	0	1	0	1	0	0	0	0	0	0
K6-5	2012-04-25	KU6	1	5	Red	Apterous	0	0	0	0	0	0	0		0	0	0	0	0	0	0	0	0	0	0	0	0	0	0	0	0	0	0	0	0	0	1	0	0	0	0	0	0	0
K6-6	2012-04-25	KU6	1	5	Red	Apterous	0	0	0	0	0	0	0		0	0	0	0	0	0	0	0	0	0	0	0	0	0	0	0	0	0	0	0	0	0	1	0	0	0	0	0	0	0
K6-7	2012-04-25	KU6	1	5	Red	Apterous	1	0	0	0	1	0	0		0	0	0	1	0	0	0	0	0	0	0	0	0	0	0	0	0	0	0	0	0	2	0	0	0	0	0	0	0	0
K6-8	2012-04-25	KU6	1	5	Red	Apterous	0	0	1	0	0	0	1		0	0	0	0	0	0	0	0	0	0	0	0	0	0	1	0	0	0	0	0	0	2	0	0	0	0	0	0	0	0
K6-9	2012-04-25	KU6	1	5	Red	Apterous	1	0	0	0	0	0	0		0	0	0	0	0	0	0	0	0	0	0	0	0	0	0	0	0	0	0	0	0	1	0	1	0	0	0	0	0	0
K6-15	2012-04-25	KU6	1	5	Green	Apterous	1	0	0	0	0	0	0		0	0	0	0	0	0	0	0	0	0	0	0	0	0	0	0	0	0	0	0	0	1	0	1	0	0	0	0	0	0
K6-2	2012-04-25	KU6	1	5	Red	Apterous	0	0	0	0	0	0	0		0	0	0	0	0	0	0	0	0	0	0	0	0	0	0	0	0	0	0	0	0	0	1	0	0	0	0	0	0	0
K6-4	2012-04-25	KU6	1	5	Red	Apterous	1	0	0	0	0	0	0		0	0	0	0	0	0	0	0	0	0	0	0	0	0	0	0	0	0	0	0	0	1	0	1	0	0	0	0	0	0
K7-21	2012-05-09	KU1	2	3	Green	Apterous	0	0	0	0	0	1	0		0	0	0	0	0	0	0	0	0	0	0	0	0	0	0	0	0	0	0	0	0	1	0	0	0	0	0	0	1	0
K7-12	2012-05-09	KU1	2	5	Green	Apterous	0	0	0	0	0	0	0		0	0	0	0	0	0	0	0	0	0	0	0	0	0	0	0	0	0	0	0	0	0	1	0	0	0	0	0	0	0
K7-16	2012-05-09	KU1	2	5	Green	Apterous	0	0	0	0	0	1	0		0	0	0	0	0	0	0	0	0	0	0	0	0	0	0	0	0	0	0	0	0	1	0	0	0	0	0	0	1	0
K7-17	2012-05-09	KU1	2	4	Green	Apterous	0	1	0	0	0	0	0		0	0	0	0	0	0	0	0	0	0	0	0	0	0	0	0	0	0	0	0	0	1	0	0	1	0	0	0	0	0
K7-18	2012-05-09	KU1	2	4	Green	Apterous	0	0	0	0	0	1	0		0	0	0	0	0	0	0	0	0	0	0	0	0	0	0	0	0	0	0	0	0	1	0	0	0	0	0	0	1	0
K7-2	2012-05-09	KU1	2	5	Green	Alate	0	0	0	0	0	1	0		0	0	0	0	0	0	0	0	0	0	0	0	0	0	0	0	0	0	0	0	0	1	0	0	0	0	0	0	1	0
K7-22	2012-05-09	KU1	2		Green	Apterous	0	0	0	0	0	0	0		0	0	0	0	0	0	0	0	0	0	0	0	0	0	0	0	0	0	0	0	0	0	1	0	0	0	0	0	0	0
K7-23	2012-05-09	KU1	2		Green	Apterous	0	0	0	0	0	0	0		0	0	0	0	0	0	0	0	0	0	0	0	0	0	0	0	0	0	0	0	0	0	1	0	0	0	0	0	0	0
K7-24	2012-05-09	KU1	2		Green	Apterous	0	0	0	0	0	0	0		0	0	0	0	0	0	0	0	0	0	0	0	0	0	0	0	0	0	0	0	0	0	1	0	0	0	0	0	0	0
K7-3	2012-05-09	KU1	2	5	Green	Apterous	1	0	0	0	0	0	0		0	0	0	0	0	0	0	0	0	0	0	0	0	0	0	0	0	0	0	0	0	1	0	1	0	0	0	0	0	0
K7-4	2012-05-09	KU1	2	5	Green	Apterous	0	0	0	0	1	0	0		0	0	0	0	0	0	0	0	0	0	0	0	0	0	0	0	0	0	0	0	0	1	0	0	0	0	0	1	0	0
K7-6	2012-05-09	KU1	2	5	Green	Apterous	1	0	0	0	0	0	0		0	0	0	0	0	0	0	0	0	0	0	0	0	0	0	0	0	0	0	0	0	1	0	1	0	0	0	0	0	0
K7-7	2012-05-09	KU1	2	5	Green	Apterous	0	0	1	0	0	0	0		0	0	0	0	0	0	0	0	0	0	0	0	0	0	0	0	0	0	0	0	0	1	0	0	0	1	0	0	0	0
K7-8	2012-05-09	KU1	2	5	Green	Apterous	1	1	0	0	0	0	0		1	0	0	0	0	0	0	0	0	0	0	0	0	0	0	0	0	0	0	0	0	2	0	0	0	0	0	0	0	0
K7-9	2012-05-09	KU1	2	5	Green	Apterous	0	0	0	0	0	0	0		0	0	0	0	0	0	0	0	0	0	0	0	0	0	0	0	0	0	0	0	0	0	1	0	0	0	0	0	0	0
K7-10	2012-05-09	KU1	2	5	Green	Apterous	1	1	0	0	0	0	0		1	0	0	0	0	0	0	0	0	0	0	0	0	0	0	0	0	0	0	0	0	2	0	0	0	0	0	0	0	0
K7-11	2012-05-09	KU1	2	5	Green	Apterous	1	0	0	1	0	0	0		0	0	1	0	0	0	0	0	0	0	0	0	0	0	0	0	0	0	0	0	0	2	0	0	0	0	0	0	0	0
K7-13	2012-05-09	KU1	2	5	Green	Apterous	1	0	0	1	0	0	0		0	0	1	0	0	0	0	0	0	0	0	0	0	0	0	0	0	0	0	0	0	2	0	0	0	0	0	0	0	0
K7-14	2012-05-09	KU1	2	5	Green	Apterous	0	0	0	0	0	0	0		0	0	0	0	0	0	0	0	0	0	0	0	0	0	0	0	0	0	0	0	0	0	1	0	0	0	0	0	0	0
K7-20	2012-05-09	KU1	2	4	Green	Apterous	0	0	0	0	0	0	0		0	0	0	0	0	0	0	0	0	0	0	0	0	0	0	0	0	0	0	0	0	0	1	0	0	0	0	0	0	0
K8-5	2012-05-09	KU2	2	5	Green	Apterous	0	0	0	0	0	1	0		0	0	0	0	0	0	0	0	0	0	0	0	0	0	0	0	0	0	0	0	0	1	0	0	0	0	0	0	1	0
K8-1	2012-05-09	KU2	2	2	Green	Apterous	0	0	0	0	0	0	0		0	0	0	0	0	0	0	0	0	0	0	0	0	0	0	0	0	0	0	0	0	0	1	0	0	0	0	0	0	0
K8-10	2012-05-09	KU2	2	3	Green	Apterous	1	0	0	0	0	0	0		0	0	0	0	0	0	0	0	0	0	0	0	0	0	0	0	0	0	0	0	0	1	0	1	0	0	0	0	0	0
K8-11	2012-05-09	KU2	2	3	Green	Apterous	1	0	0	0	0	0	0		0	0	0	0	0	0	0	0	0	0	0	0	0	0	0	0	0	0	0	0	0	1	0	1	0	0	0	0	0	0
K8-13	2012-05-09	KU2	2	5	Red	Apterous	0	0	0	0	0	0	0		0	0	0	0	0	0	0	0	0	0	0	0	0	0	0	0	0	0	0	0	0	0	1	0	0	0	0	0	0	0
K8-15	2012-05-09	KU2	2	5	Red	Apterous	0	0	0	0	0	0	0		0	0	0	0	0	0	0	0	0	0	0	0	0	0	0	0	0	0	0	0	0	0	1	0	0	0	0	0	0	0
K8-16	2012-05-09	KU2	2	5	Red	Alate	0	0	0	0	0	0	0		0	0	0	0	0	0	0	0	0	0	0	0	0	0	0	0	0	0	0	0	0	0	1	0	0	0	0	0	0	0
K8-17	2012-05-09	KU2	2	5	Red	Alate	1	0	0	0	0	0	0		0	0	0	0	0	0	0	0	0	0	0	0	0	0	0	0	0	0	0	0	0	1	0	1	0	0	0	0	0	0
K8-18	2012-05-09	KU2	2	4	Red	Apterous	0	0	0	0	1	0	0		0	0	0	0	0	0	0	0	0	0	0	0	0	0	0	0	0	0	0	0	0	1	0	0	0	0	0	1	0	0
K8-19	2012-05-09	KU2	2	4	Red	Apterous	0	0	0	0	1	0	0		0	0	0	0	0	0	0	0	0	0	0	0	0	0	0	0	0	0	0	0	0	1	0	0	0	0	0	1	0	0
K8-2	2012-05-09	KU2	2	5	Green	Apterous	0	1	0	0	0	0	0		0	0	0	0	0	0	0	0	0	0	0	0	0	0	0	0	0	0	0	0	0	1	0	0	1	0	0	0	0	0
K8-20	2012-05-09	KU2	2	4	Red	Apterous	0	0	0	1	0	0	0		0	0	0	0	0	0	0	0	0	0	0	0	0	0	0	0	0	0	0	0	0	1	0	0	0	0	1	0	0	0
K8-23	2012-05-09	KU2	2	3	Red	Apterous	1	0	0	0	1	0	0		0	0	0	1	0	0	0	0	0	0	0	0	0	0	0	0	0	0	0	0	0	2	0	0	0	0	0	0	0	0
K8-24	2012-05-09	KU2	2	3	Red	Apterous	0	0	0	0	0	0	0		0	0	0	0	0	0	0	0	0	0	0	0	0	0	0	0	0	0	0	0	0	0	1	0	0	0	0	0	0	0
K8-3	2012-05-09	KU2	2	5	Green	Apterous	1	0	0	1	0	0	0		0	0	1	0	0	0	0	0	0	0	0	0	0	0	0	0	0	0	0	0	0	2	0	0	0	0	0	0	0	0
K8-8	2012-05-09	KU2	2	4	Green	Apterous	0	0	0	0	0	0	0		0	0	0	0	0	0	0	0	0	0	0	0	0	0	0	0	0	0	0	0	0	0	1	0	0	0	0	0	0	0
K8-12	2012-05-09	KU2	2	3	Green	Apterous	0	0	0	0	0	0	0		0	0	0	0	0	0	0	0	0	0	0	0	0	0	0	0	0	0	0	0	0	0	1	0	0	0	0	0	0	0
K8-14	2012-05-09	KU2	2	5	Red	Apterous	0	0	0	1	0	0	0		0	0	0	0	0	0	0	0	0	0	0	0	0	0	0	0	0	0	0	0	0	1	0	0	0	0	1	0	0	0
K8-21	2012-05-09	KU2	2	4	Red	Apterous	1	0	0	0	1	0	0		0	0	0	1	0	0	0	0	0	0	0	0	0	0	0	0	0	0	0	0	0	2	0	0	0	0	0	0	0	0
K8-22	2012-05-09	KU2	2	4	Red	Apterous	0	0	0	0	1	0	0		0	0	0	0	0	0	0	0	0	0	0	0	0	0	0	0	0	0	0	0	0	1	0	0	0	0	0	1	0	0
K8-6	2012-05-09	KU2	2	5	Green	Apterous	0	0	0	0	0	0	0		0	0	0	0	0	0	0	0	0	0	0	0	0	0	0	0	0	0	0	0	0	0	1	0	0	0	0	0	0	0
K8-9	2012-05-09	KU2	2	4	Green	Apterous	0	0	0	0	0	0	0		0	0	0	0	0	0	0	0	0	0	0	0	0	0	0	0	0	0	0	0	0	0	1	0	0	0	0	0	0	0
K9-5	2012-05-09	KU3	2	5	Red	Apterous	0	0	0	0	0	1	1		0	0	0	0	0	0	0	0	0	0	0	0	0	0	0	0	0	0	0	0	1	2	0	0	0	0	0	0	0	0
K9-1	2012-05-09	KU3	2	5	Red	Apterous	1	0	0	1	0	0	0		0	0	1	0	0	0	0	0	0	0	0	0	0	0	0	0	0	0	0	0	0	2	0	0	0	0	0	0	0	0
K9-10	2012-05-09	KU3	2	3	Red	Apterous	1	1	0	0	0	0	0		1	0	0	0	0	0	0	0	0	0	0	0	0	0	0	0	0	0	0	0	0	2	0	0	0	0	0	0	0	0
K9-13	2012-05-09	KU3	2	4	Green	Apterous	1	0	0	1	0	0	0		0	0	1	0	0	0	0	0	0	0	0	0	0	0	0	0	0	0	0	0	0	2	0	0	0	0	0	0	0	0
K9-16	2012-05-09	KU3	2	5	Green	Apterous	0	0	0	0	0	0	0		0	0	0	0	0	0	0	0	0	0	0	0	0	0	0	0	0	0	0	0	0	0	1	0	0	0	0	0	0	0
K9-17	2012-05-09	KU3	2	5	Green	Apterous	0	0	0	0	0	0	0		0	0	0	0	0	0	0	0	0	0	0	0	0	0	0	0	0	0	0	0	0	0	1	0	0	0	0	0	0	0
K9-18	2012-05-09	KU3	2	5	Green	Apterous	0	1	0	0	0	0	0		0	0	0	0	0	0	0	0	0	0	0	0	0	0	0	0	0	0	0	0	0	1	0	0	1	0	0	0	0	0
K9-21	2012-05-09	KU3	2	5	Green	Apterous	0	0	0	0	0	0	0		0	0	0	0	0	0	0	0	0	0	0	0	0	0	0	0	0	0	0	0	0	0	1	0	0	0	0	0	0	0
K9-22	2012-05-09	KU3	2	4	Green	Apterous	0	1	0	0	0	0	0		0	0	0	0	0	0	0	0	0	0	0	0	0	0	0	0	0	0	0	0	0	1	0	0	1	0	0	0	0	0
K9-23	2012-05-09	KU3	2	4	Green	Apterous	0	0	0	0	0	0	0		0	0	0	0	0	0	0	0	0	0	0	0	0	0	0	0	0	0	0	0	0	0	1	0	0	0	0	0	0	0
K9-24	2012-05-09	KU3	2	2	Green	Apterous	0	0	0	0	0	0	0		0	0	0	0	0	0	0	0	0	0	0	0	0	0	0	0	0	0	0	0	0	0	1	0	0	0	0	0	0	0
K9-3	2012-05-09	KU3	2	4	Red	Apterous	0	0	0	0	0	0	1		0	0	0	0	0	0	0	0	0	0	0	0	0	0	0	0	0	0	0	0	0	1	0	0	0	0	0	0	0	1
K9-4	2012-05-09	KU3	2	5	Red	Apterous	1	0	0	0	0	0	0		0	0	0	0	0	0	0	0	0	0	0	0	0	0	0	0	0	0	0	0	0	1	0	1	0	0	0	0	0	0
K9-6	2012-05-09	KU3	2	5	Red	Apterous	1	0	0	0	0	0	0		0	0	0	0	0	0	0	0	0	0	0	0	0	0	0	0	0	0	0	0	0	1	0	1	0	0	0	0	0	0
K9-7	2012-05-09	KU3	2	5	Red	Apterous	1	0	0	1	0	0	0		0	0	1	0	0	0	0	0	0	0	0	0	0	0	0	0	0	0	0	0	0	2	0	0	0	0	0	0	0	0
K9-8	2012-05-09	KU3	2	5	Red	Apterous	0	0	0	0	0	0	0		0	0	0	0	0	0	0	0	0	0	0	0	0	0	0	0	0	0	0	0	0	0	1	0	0	0	0	0	0	0
K9-9	2012-05-09	KU3	2	3	Red	Apterous	0	0	0	0	0	0	0		0	0	0	0	0	0	0	0	0	0	0	0	0	0	0	0	0	0	0	0	0	0	1	0	0	0	0	0	0	0
K9-11	2012-05-09	KU3	2	3	Red	Apterous	1	0	0	0	0	0	0		0	0	0	0	0	0	0	0	0	0	0	0	0	0	0	0	0	0	0	0	0	1	0	1	0	0	0	0	0	0
K9-12	2012-05-09	KU3	2	2	Red	Apterous	1	0	0	0	0	0	0		0	0	0	0	0	0	0	0	0	0	0	0	0	0	0	0	0	0	0	0	0	1	0	1	0	0	0	0	0	0
K9-14	2012-05-09	KU3	2	5	Green	Apterous	1	0	0	0	0	0	0		0	0	0	0	0	0	0	0	0	0	0	0	0	0	0	0	0	0	0	0	0	1	0	1	0	0	0	0	0	0
K9-2	2012-05-09	KU3	2	5	Red	Apterous	1	0	0	1	0	0	0		0	0	1	0	0	0	0	0	0	0	0	0	0	0	0	0	0	0	0	0	0	2	0	0	0	0	0	0	0	0
K10-1	2012-05-09	KU4	2	5	Green	Apterous	0	0	0	0	0	0	0		0	0	0	0	0	0	0	0	0	0	0	0	0	0	0	0	0	0	0	0	0	0	1	0	0	0	0	0	0	0
K10-10	2012-05-09	KU4	2	5	Green	Alate	0	0	0	0	0	1	0		0	0	0	0	0	0	0	0	0	0	0	0	0	0	0	0	0	0	0	0	0	1	0	0	0	0	0	0	1	0
K10-11	2012-05-09	KU4	2	5	Green	Apterous	1	0	1	1	0	0	0		0	1	1	0	0	0	0	0	0	0	0	1	0	0	0	0	0	0	0	0	0	3	0	0	0	0	0	0	0	0
K10-12	2012-05-09	KU4	2	4	Green	Apterous	0	0	0	0	0	1	0		0	0	0	0	0	0	0	0	0	0	0	0	0	0	0	0	0	0	0	0	0	1	0	0	0	0	0	0	1	0
K10-16	2012-05-09	KU4	2	4	Red	Apterous	0	0	0	1	0	0	0		0	0	0	0	0	0	0	0	0	0	0	0	0	0	0	0	0	0	0	0	0	1	0	0	0	0	1	0	0	0
K10-18	2012-05-09	KU4	2	3	Red	Apterous	0	0	0	0	0	0	0		0	0	0	0	0	0	0	0	0	0	0	0	0	0	0	0	0	0	0	0	0	0	1	0	0	0	0	0	0	0
K10-2	2012-05-09	KU4	2	5	Green	Alate	0	0	0	0	0	1	0		0	0	0	0	0	0	0	0	0	0	0	0	0	0	0	0	0	0	0	0	0	1	0	0	0	0	0	0	1	0
K10-20	2012-05-09	KU4	2	3	Red	Apterous	0	0	0	0	0	0	0		0	0	0	0	0	0	0	0	0	0	0	0	0	0	0	0	0	0	0	0	0	0	1	0	0	0	0	0	0	0
K10-22	2012-05-09	KU4	2	4	Green	Apterous	1	0	0	0	0	0	0		0	0	0	0	0	0	0	0	0	0	0	0	0	0	0	0	0	0	0	0	0	1	0	1	0	0	0	0	0	0
K10-23	2012-05-09	KU4	2	4	Green	Apterous	1	0	0	0	0	0	0		0	0	0	0	0	0	0	0	0	0	0	0	0	0	0	0	0	0	0	0	0	1	0	1	0	0	0	0	0	0
K10-24	2012-05-09	KU4	2	4	Green	Apterous	0	0	0	0	0	0	1		0	0	0	0	0	0	0	0	0	0	0	0	0	0	0	0	0	0	0	0	0	1	0	0	0	0	0	0	0	1
K10-3	2012-05-09	KU4	2	5	Green	Apterous	0	0	0	0	0	0	0		0	0	0	0	0	0	0	0	0	0	0	0	0	0	0	0	0	0	0	0	0	0	1	0	0	0	0	0	0	0
K10-4	2012-05-09	KU4	2	5	Green	Apterous	0	0	0	0	0	0	0		0	0	0	0	0	0	0	0	0	0	0	0	0	0	0	0	0	0	0	0	0	0	1	0	0	0	0	0	0	0
K10-5	2012-05-09	KU4	2	5	Green	Apterous	0	0	0	0	0	1	0		0	0	0	0	0	0	0	0	0	0	0	0	0	0	0	0	0	0	0	0	0	1	0	0	0	0	0	0	1	0
K10-6	2012-05-09	KU4	2	5	Green	Apterous	0	1	0	0	0	0	0		0	0	0	0	0	0	0	0	0	0	0	0	0	0	0	0	0	0	0	0	0	1	0	0	1	0	0	0	0	0
K10-7	2012-05-09	KU4	2	5	Green	Alate	0	0	0	0	0	1	0		0	0	0	0	0	0	0	0	0	0	0	0	0	0	0	0	0	0	0	0	0	1	0	0	0	0	0	0	1	0
K10-8	2012-05-09	KU4	2	5	Green	Apterous	0	1	0	0	0	0	0		0	0	0	0	0	0	0	0	0	0	0	0	0	0	0	0	0	0	0	0	0	1	0	0	1	0	0	0	0	0
K10-19	2012-05-09	KU4	2	3	Red	Apterous	1	0	0	0	0	0	0		0	0	0	0	0	0	0	0	0	0	0	0	0	0	0	0	0	0	0	0	0	1	0	1	0	0	0	0	0	0
K10-9	2012-05-09	KU4	2	4	Green	Apterous	0	0	1	1	0	0	0		0	0	0	0	0	0	0	0	0	0	0	1	0	0	0	0	0	0	0	0	0	2	0	0	0	0	0	0	0	0
K10-21	2012-05-09	KU4	2	2	Red	Apterous	1	0	0	0	0	0	0		0	0	0	0	0	0	0	0	0	0	0	0	0	0	0	0	0	0	0	0	0	1	0	1	0	0	0	0	0	0
K11-10	2012-05-09	KU5	2	3	Green	Apterous	1	0	0	0	0	1	1		0	0	0	0	1	1	0	0	0	0	0	0	0	0	0	0	0	0	0	0	1	3	0	0	0	0	0	0	0	0
K11-12	2012-05-09	KU5	2	4	Green	Apterous	1	1	0	0	0	1	0		1	0	0	0	1	0	0	0	0	1	0	0	0	0	0	0	0	0	0	0	0	3	0	0	0	0	0	0	0	0
K11-7	2012-05-09	KU5	2	4	Green	Apterous	0	0	0	0	0	1	0		0	0	0	0	0	0	0	0	0	0	0	0	0	0	0	0	0	0	0	0	0	1	0	0	0	0	0	0	1	0
K11-1	2012-05-09	KU5	2	5	Green	Apterous	0	1	0	0	0	0	0		0	0	0	0	0	0	0	0	0	0	0	0	0	0	0	0	0	0	0	0	0	1	0	0	1	0	0	0	0	0
K11-11	2012-05-09	KU5	2	4	Green	Apterous	0	0	0	0	0	1	0		0	0	0	0	0	0	0	0	0	0	0	0	0	0	0	0	0	0	0	0	0	1	0	0	0	0	0	0	1	0
K11-13	2012-05-09	KU5	2	3	Green	Apterous	0	0	0	0	0	0	1		0	0	0	0	0	0	0	0	0	0	0	0	0	0	0	0	0	0	0	0	0	1	0	0	0	0	0	0	0	1
K11-14	2012-05-09	KU5	2	4	Green	Apterous	1	0	0	0	0	0	0		0	0	0	0	0	0	0	0	0	0	0	0	0	0	0	0	0	0	0	0	0	1	0	1	0	0	0	0	0	0
K11-15	2012-05-09	KU5	2	4	Green	Apterous	0	1	0	0	0	0	0		0	0	0	0	0	0	0	0	0	0	0	0	0	0	0	0	0	0	0	0	0	1	0	0	1	0	0	0	0	0
K11-16	2012-05-09	KU5	2	5	Green	Alate	0	0	0	1	0	0	0		0	0	0	0	0	0	0	0	0	0	0	0	0	0	0	0	0	0	0	0	0	1	0	0	0	0	1	0	0	0
K11-17	2012-05-09	KU5	2	3	Green	Apterous	1	0	1	0	0	1	0		0	1	0	0	1	0	0	0	0	0	0	0	0	1	0	0	0	0	0	0	0	3	0	0	0	0	0	0	0	0
K11-18	2012-05-09	KU5	2	4	Green	Apterous	0	0	0	1	0	0	0		0	0	0	0	0	0	0	0	0	0	0	0	0	0	0	0	0	0	0	0	0	1	0	0	0	0	1	0	0	0
K11-19	2012-05-09	KU5	2	4	Green	Apterous	1	0	0	0	0	0	0		0	0	0	0	0	0	0	0	0	0	0	0	0	0	0	0	0	0	0	0	0	1	0	1	0	0	0	0	0	0
K11-2	2012-05-09	KU5	2	5	Green	Apterous	1	0	0	0	0	0	0		0	0	0	0	0	0	0	0	0	0	0	0	0	0	0	0	0	0	0	0	0	1	0	1	0	0	0	0	0	0
K11-20	2012-05-09	KU5	2	3	Red	Apterous	0	0	0	0	0	0	0		0	0	0	0	0	0	0	0	0	0	0	0	0	0	0	0	0	0	0	0	0	0	1	0	0	0	0	0	0	0
K11-21	2012-05-09	KU5	2	3	Red	Apterous	0	0	0	0	0	0	0		0	0	0	0	0	0	0	0	0	0	0	0	0	0	0	0	0	0	0	0	0	0	1	0	0	0	0	0	0	0
K11-22	2012-05-09	KU5	2	4	Red	Apterous	1	0	0	0	0	0	0		0	0	0	0	0	0	0	0	0	0	0	0	0	0	0	0	0	0	0	0	0	1	0	1	0	0	0	0	0	0
K11-23	2012-05-09	KU5	2	3	Red	Apterous	0	0	0	0	0	0	0		0	0	0	0	0	0	0	0	0	0	0	0	0	0	0	0	0	0	0	0	0	0	1	0	0	0	0	0	0	0
K11-24	2012-05-09	KU5	2	5	Red	Apterous	0	0	0	0	0	0	0		0	0	0	0	0	0	0	0	0	0	0	0	0	0	0	0	0	0	0	0	0	0	1	0	0	0	0	0	0	0
K11-3	2012-05-09	KU5	2	5	Green	Apterous	1	0	0	0	0	0	0		0	0	0	0	0	0	0	0	0	0	0	0	0	0	0	0	0	0	0	0	0	1	0	1	0	0	0	0	0	0
K11-4	2012-05-09	KU5	2	4	Green	Apterous	0	0	0	0	0	0	1		0	0	0	0	0	0	0	0	0	0	0	0	0	0	0	0	0	0	0	0	0	1	0	0	0	0	0	0	0	1
K11-5	2012-05-09	KU5	2	5	Green	Apterous	0	0	0	0	0	0	1		0	0	0	0	0	0	0	0	0	0	0	0	0	0	0	0	0	0	0	0	0	1	0	0	0	0	0	0	0	1
K11-6	2012-05-09	KU5	2	5	Green	Apterous	1	0	0	0	0	0	0		0	0	0	0	0	0	0	0	0	0	0	0	0	0	0	0	0	0	0	0	0	1	0	1	0	0	0	0	0	0
K11-8	2012-05-09	KU5	2	4	Green	Apterous	0	0	0	0	0	1	0		0	0	0	0	0	0	0	0	0	0	0	0	0	0	0	0	0	0	0	0	0	1	0	0	0	0	0	0	1	0
K11-9	2012-05-09	KU5	2	4	Green	Apterous	1	0	0	1	0	0	0		0	0	1	0	0	0	0	0	0	0	0	0	0	0	0	0	0	0	0	0	0	2	0	0	0	0	0	0	0	0
K12-15	2012-05-09	KU6	2	5	Green	Apterous	1	0	0	0	0	1	0		0	0	0	0	1	0	0	0	0	0	0	0	0	0	0	0	0	0	0	0	0	2	0	0	0	0	0	0	0	0
K12-1	2012-05-09	KU6	2	5	Green	Apterous	0	0	0	0	0	0	0		0	0	0	0	0	0	0	0	0	0	0	0	0	0	0	0	0	0	0	0	0	0	1	0	0	0	0	0	0	0
K12-10	2012-05-09	KU6	2	3	Green	Apterous	1	0	0	0	0	0	0		0	0	0	0	0	0	0	0	0	0	0	0	0	0	0	0	0	0	0	0	0	1	0	1	0	0	0	0	0	0
K12-11	2012-05-09	KU6	2	3	Green	Apterous	0	0	0	0	0	1	0		0	0	0	0	0	0	0	0	0	0	0	0	0	0	0	0	0	0	0	0	0	1	0	0	0	0	0	0	1	0
K12-12	2012-05-09	KU6	2	3	Green	Apterous	1	0	0	0	0	0	0		0	0	0	0	0	0	0	0	0	0	0	0	0	0	0	0	0	0	0	0	0	1	0	1	0	0	0	0	0	0
K12-13	2012-05-09	KU6	2	5	Green	Apterous	1	1	0	0	0	0	0		1	0	0	0	0	0	0	0	0	0	0	0	0	0	0	0	0	0	0	0	0	2	0	0	0	0	0	0	0	0
K12-14	2012-05-09	KU6	2	5	Green	Apterous	1	0	0	0	0	0	0		0	0	0	0	0	0	0	0	0	0	0	0	0	0	0	0	0	0	0	0	0	1	0	1	0	0	0	0	0	0
K12-16	2012-05-09	KU6	2	4	Green	Apterous	0	0	0	0	0	0	0		0	0	0	0	0	0	0	0	0	0	0	0	0	0	0	0	0	0	0	0	0	0	1	0	0	0	0	0	0	0
K12-17	2012-05-09	KU6	2	4	Green	Apterous	1	0	0	0	0	0	0		0	0	0	0	0	0	0	0	0	0	0	0	0	0	0	0	0	0	0	0	0	1	0	1	0	0	0	0	0	0
K12-18	2012-05-09	KU6	2	4	Green	Apterous	0	0	0	0	0	0	0		0	0	0	0	0	0	0	0	0	0	0	0	0	0	0	0	0	0	0	0	0	0	1	0	0	0	0	0	0	0
K12-19	2012-05-09	KU6	2	3	Green	Apterous	0	0	0	0	0	0	0		0	0	0	0	0	0	0	0	0	0	0	0	0	0	0	0	0	0	0	0	0	0	1	0	0	0	0	0	0	0
K12-2	2012-05-09	KU6	2	5	Green	Apterous	1	1	0	0	0	0	0		1	0	0	0	0	0	0	0	0	0	0	0	0	0	0	0	0	0	0	0	0	2	0	0	0	0	0	0	0	0
K12-20	2012-05-09	KU6	2	3	Green	Apterous	1	0	0	0	0	0	0		0	0	0	0	0	0	0	0	0	0	0	0	0	0	0	0	0	0	0	0	0	1	0	1	0	0	0	0	0	0
K12-21	2012-05-09	KU6	2	5	Green	Alate	0	0	0	0	0	0	0		0	0	0	0	0	0	0	0	0	0	0	0	0	0	0	0	0	0	0	0	0	0	1	0	0	0	0	0	0	0
K12-22	2012-05-09	KU6	2	3	Green	Apterous	0	0	0	0	0	0	0		0	0	0	0	0	0	0	0	0	0	0	0	0	0	0	0	0	0	0	0	0	0	1	0	0	0	0	0	0	0
K12-23	2012-05-09	KU6	2	2	Green	Apterous	0	0	0	0	0	0	0		0	0	0	0	0	0	0	0	0	0	0	0	0	0	0	0	0	0	0	0	0	0	1	0	0	0	0	0	0	0
K12-24	2012-05-09	KU6	2	3	Green	Apterous	0	0	0	0	0	0	0		0	0	0	0	0	0	0	0	0	0	0	0	0	0	0	0	0	0	0	0	0	0	1	0	0	0	0	0	0	0
K12-3	2012-05-09	KU6	2	4	Green	Apterous	0	0	0	0	0	1	0		0	0	0	0	0	0	0	0	0	0	0	0	0	0	0	0	0	0	0	0	0	1	0	0	0	0	0	0	1	0
K12-4	2012-05-09	KU6	2	5	Green	Apterous	0	0	1	0	0	1	0		0	0	0	0	0	0	0	0	0	0	0	0	0	1	0	0	0	0	0	0	0	2	0	0	0	0	0	0	0	0
K12-5	2012-05-09	KU6	2	4	Green	Apterous	1	0	0	0	0	0	0		0	0	0	0	0	0	0	0	0	0	0	0	0	0	0	0	0	0	0	0	0	1	0	1	0	0	0	0	0	0
K12-6	2012-05-09	KU6	2	4	Green	Apterous	0	0	0	0	0	0	0		0	0	0	0	0	0	0	0	0	0	0	0	0	0	0	0	0	0	0	0	0	0	1	0	0	0	0	0	0	0
K12-7	2012-05-09	KU6	2	4	Green	Apterous	0	0	0	0	0	0	0		0	0	0	0	0	0	0	0	0	0	0	0	0	0	0	0	0	0	0	0	0	0	1	0	0	0	0	0	0	0
K12-8	2012-05-09	KU6	2	4	Green	Apterous	0	0	0	0	0	0	0		0	0	0	0	0	0	0	0	0	0	0	0	0	0	0	0	0	0	0	0	0	0	1	0	0	0	0	0	0	0
K12-9	2012-05-09	KU6	2	4	Green	Apterous	0	0	0	0	0	0	0		0	0	0	0	0	0	0	0	0	0	0	0	0	0	0	0	0	0	0	0	0	0	1	0	0	0	0	0	0	0
K13-1	2012-05-23	KU1	3	5	Green	Apterous	0	0	0	1	0	1	0		0	0	0	0	0	0	0	0	0	0	0	0	0	0	0	0	1	0	0	0	0	2	0	0	0	0	0	0	0	0
K13-2	2012-05-23	KU1	3	5	Green	Apterous	1	0	0	0	0	1	0		0	0	0	0	1	0	0	0	0	0	0	0	0	0	0	0	0	0	0	0	0	2	0	0	0	0	0	0	0	0
K13-10	2012-05-23	KU1	3	5	Green	Apterous	1	0	0	0	0	0	0		0	0	0	0	0	0	0	0	0	0	0	0	0	0	0	0	0	0	0	0	0	1	0	1	0	0	0	0	0	0
K13-11	2012-05-23	KU1	3	4	Green	Apterous	1	0	0	0	0	0	0		0	0	0	0	0	0	0	0	0	0	0	0	0	0	0	0	0	0	0	0	0	1	0	1	0	0	0	0	0	0
K13-12	2012-05-23	KU1	3	5	Green	Apterous	1	0	0	0	0	0	0		0	0	0	0	0	0	0	0	0	0	0	0	0	0	0	0	0	0	0	0	0	1	0	1	0	0	0	0	0	0
K13-13	2012-05-23	KU1	3	5	Green	Apterous	1	0	0	1	0	0	0		0	0	1	0	0	0	0	0	0	0	0	0	0	0	0	0	0	0	0	0	0	2	0	0	0	0	0	0	0	0
K13-14	2012-05-23	KU1	3	5	Green	Apterous	1	0	0	0	0	0	0		0	0	0	0	0	0	0	0	0	0	0	0	0	0	0	0	0	0	0	0	0	1	0	1	0	0	0	0	0	0
K13-15	2012-05-23	KU1	3	5	Green	Apterous	1	0	0	0	0	0	0		0	0	0	0	0	0	0	0	0	0	0	0	0	0	0	0	0	0	0	0	0	1	0	1	0	0	0	0	0	0
K13-16	2012-05-23	KU1	3	5	Green	Apterous	0	0	0	0	0	0	0		0	0	0	0	0	0	0	0	0	0	0	0	0	0	0	0	0	0	0	0	0	0	1	0	0	0	0	0	0	0
K13-17	2012-05-23	KU1	3	5	Green	Apterous	0	0	1	0	0	1	0		0	0	0	0	0	0	0	0	0	0	0	0	0	1	0	0	0	0	0	0	0	2	0	0	0	0	0	0	0	0
K13-18	2012-05-23	KU1	3	4	Green	Apterous	1	0	0	1	0	0	0		0	0	1	0	0	0	0	0	0	0	0	0	0	0	0	0	0	0	0	0	0	2	0	0	0	0	0	0	0	0
K13-19	2012-05-23	KU1	3	4	Green	Apterous	0	0	0	0	0	1	0		0	0	0	0	0	0	0	0	0	0	0	0	0	0	0	0	0	0	0	0	0	1	0	0	0	0	0	0	1	0
K13-21	2012-05-23	KU1	3	4	Green	Apterous	0	0	0	0	0	1	0		0	0	0	0	0	0	0	0	0	0	0	0	0	0	0	0	0	0	0	0	0	1	0	0	0	0	0	0	1	0
K13-22	2012-05-23	KU1	3	4	Green	Apterous	1	0	0	1	0	0	0		0	0	1	0	0	0	0	0	0	0	0	0	0	0	0	0	0	0	0	0	0	2	0	0	0	0	0	0	0	0
K13-3	2012-05-23	KU1	3	5	Green	Apterous	0	1	0	0	0	0	0		0	0	0	0	0	0	0	0	0	0	0	0	0	0	0	0	0	0	0	0	0	1	0	0	1	0	0	0	0	0
K13-4	2012-05-23	KU1	3	5	Green	Apterous	0	0	0	1	0	0	0		0	0	0	0	0	0	0	0	0	0	0	0	0	0	0	0	0	0	0	0	0	1	0	0	0	0	1	0	0	0
K13-5	2012-05-23	KU1	3	5	Green	Alate	1	0	0	1	0	0	0		0	0	1	0	0	0	0	0	0	0	0	0	0	0	0	0	0	0	0	0	0	2	0	0	0	0	0	0	0	0
K13-6	2012-05-23	KU1	3	3	Green	Apterous	1	0	0	0	0	0	0		0	0	0	0	0	0	0	0	0	0	0	0	0	0	0	0	0	0	0	0	0	1	0	1	0	0	0	0	0	0
K13-7	2012-05-23	KU1	3	4	Green	Apterous	1	0	0	0	0	0	0		0	0	0	0	0	0	0	0	0	0	0	0	0	0	0	0	0	0	0	0	0	1	0	1	0	0	0	0	0	0
K13-8	2012-05-23	KU1	3	4	Green	Apterous	0	0	0	0	0	0	0		0	0	0	0	0	0	0	0	0	0	0	0	0	0	0	0	0	0	0	0	0	0	1	0	0	0	0	0	0	0
K13-9	2012-05-23	KU1	3	5	Green	Apterous	1	0	0	0	0	0	0		0	0	0	0	0	0	0	0	0	0	0	0	0	0	0	0	0	0	0	0	0	1	0	1	0	0	0	0	0	0
K13-20	2012-05-23	KU1	3	4	Green	Apterous	0	0	0	0	0	0	0		0	0	0	0	0	0	0	0	0	0	0	0	0	0	0	0	0	0	0	0	0	0	1	0	0	0	0	0	0	0
K13-24	2012-05-23	KU1	3	3	Green	Apterous	0	0	0	0	0	0	0		0	0	0	0	0	0	0	0	0	0	0	0	0	0	0	0	0	0	0	0	0	0	1	0	0	0	0	0	0	0
K14-1	2012-05-23	KU2	3	5	Green	Apterous	0	0	1	0	0	0	0		0	0	0	0	0	0	0	0	0	0	0	0	0	0	0	0	0	0	0	0	0	1	0	0	0	1	0	0	0	0
K14-10	2012-05-23	KU2	3	5	Green	Apterous	1	0	0	0	0	0	0		0	0	0	0	0	0	0	0	0	0	0	0	0	0	0	0	0	0	0	0	0	1	0	1	0	0	0	0	0	0
K14-11	2012-05-23	KU2	3	5	Green	Apterous	1	0	0	1	0	0	0		0	0	1	0	0	0	0	0	0	0	0	0	0	0	0	0	0	0	0	0	0	2	0	0	0	0	0	0	0	0
K14-12	2012-05-23	KU2	3	5	Green	Apterous	0	1	0	0	0	0	0		0	0	0	0	0	0	0	0	0	0	0	0	0	0	0	0	0	0	0	0	0	1	0	0	1	0	0	0	0	0
K14-13	2012-05-23	KU2	3	5	Green	Alate	1	0	0	1	0	0	0		0	0	1	0	0	0	0	0	0	0	0	0	0	0	0	0	0	0	0	0	0	2	0	0	0	0	0	0	0	0
K14-14	2012-05-23	KU2	3	5	Green	Apterous	1	0	0	1	0	0	0		0	0	1	0	0	0	0	0	0	0	0	0	0	0	0	0	0	0	0	0	0	2	0	0	0	0	0	0	0	0
K14-15	2012-05-23	KU2	3	5	Green	Apterous	0	1	0	0	0	0	0		0	0	0	0	0	0	0	0	0	0	0	0	0	0	0	0	0	0	0	0	0	1	0	0	1	0	0	0	0	0
K14-16	2012-05-23	KU2	3	5	Green	Alate	0	1	0	0	0	0	0		0	0	0	0	0	0	0	0	0	0	0	0	0	0	0	0	0	0	0	0	0	1	0	0	1	0	0	0	0	0
K14-17	2012-05-23	KU2	3	5	Green	Alate	1	0	0	0	0	0	0		0	0	0	0	0	0	0	0	0	0	0	0	0	0	0	0	0	0	0	0	0	1	0	1	0	0	0	0	0	0
K14-18	2012-05-23	KU2	3	5	Green	Alate	1	0	0	1	0	0	0		0	0	1	0	0	0	0	0	0	0	0	0	0	0	0	0	0	0	0	0	0	2	0	0	0	0	0	0	0	0
K14-19	2012-05-23	KU2	3	5	Green	Apterous	1	0	0	0	0	0	0		0	0	0	0	0	0	0	0	0	0	0	0	0	0	0	0	0	0	0	0	0	1	0	1	0	0	0	0	0	0
K14-2	2012-05-23	KU2	3	5	Green	Apterous	0	0	0	0	0	0	0		0	0	0	0	0	0	0	0	0	0	0	0	0	0	0	0	0	0	0	0	0	0	1	0	0	0	0	0	0	0
K14-20	2012-05-23	KU2	3	5	Green	Alate	1	0	0	0	0	0	0		0	0	0	0	0	0	0	0	0	0	0	0	0	0	0	0	0	0	0	0	0	1	0	1	0	0	0	0	0	0
K14-21	2012-05-23	KU2	3	4	Green	Apterous	0	0	0	0	0	0	0		0	0	0	0	0	0	0	0	0	0	0	0	0	0	0	0	0	0	0	0	0	0	1	0	0	0	0	0	0	0
K14-22	2012-05-23	KU2	3	4	Green	Apterous	0	0	0	0	0	0	0		0	0	0	0	0	0	0	0	0	0	0	0	0	0	0	0	0	0	0	0	0	0	1	0	0	0	0	0	0	0
K14-23	2012-05-23	KU2	3	3	Green	Apterous	0	0	0	0	0	0	0		0	0	0	0	0	0	0	0	0	0	0	0	0	0	0	0	0	0	0	0	0	0	1	0	0	0	0	0	0	0
K14-24	2012-05-23	KU2	3	3	Green	Apterous	0	1	0	0	0	0	0		0	0	0	0	0	0	0	0	0	0	0	0	0	0	0	0	0	0	0	0	0	1	0	0	1	0	0	0	0	0
K14-3	2012-05-23	KU2	3	5	Green	Alate	1	0	0	0	0	0	0		0	0	0	0	0	0	0	0	0	0	0	0	0	0	0	0	0	0	0	0	0	1	0	1	0	0	0	0	0	0
K14-4	2012-05-23	KU2	3	5	Green	Apterous	0	1	0	0	0	0	0		0	0	0	0	0	0	0	0	0	0	0	0	0	0	0	0	0	0	0	0	0	1	0	0	1	0	0	0	0	0
K14-5	2012-05-23	KU2	3	5	Green	Apterous	1	0	0	0	0	0	0		0	0	0	0	0	0	0	0	0	0	0	0	0	0	0	0	0	0	0	0	0	1	0	1	0	0	0	0	0	0
K14-6	2012-05-23	KU2	3	4	Green	Apterous	0	0	0	0	0	0	0		0	0	0	0	0	0	0	0	0	0	0	0	0	0	0	0	0	0	0	0	0	0	1	0	0	0	0	0	0	0
K14-7	2012-05-23	KU2	3	4	Green	Apterous	1	0	0	0	0	0	0		0	0	0	0	0	0	0	0	0	0	0	0	0	0	0	0	0	0	0	0	0	1	0	1	0	0	0	0	0	0
K14-8	2012-05-23	KU2	3	3	Green	Apterous	1	1	0	0	0	0	0		1	0	0	0	0	0	0	0	0	0	0	0	0	0	0	0	0	0	0	0	0	2	0	0	0	0	0	0	0	0
K14-9	2012-05-23	KU2	3	5	Green	Alate	0	0	0	0	0	0	0		0	0	0	0	0	0	0	0	0	0	0	0	0	0	0	0	0	0	0	0	0	0	1	0	0	0	0	0	0	0
K15-1	2012-05-23	KU3	3	5	Green	Alate	0	1	0	0	0	0	0		0	0	0	0	0	0	0	0	0	0	0	0	0	0	0	0	0	0	0	0	0	1	0	0	1	0	0	0	0	0
K15-10	2012-05-23	KU3	3	4	Green	Apterous	0	0	0	0	0	0	0		0	0	0	0	0	0	0	0	0	0	0	0	0	0	0	0	0	0	0	0	0	0	1	0	0	0	0	0	0	0
K15-11	2012-05-23	KU3	3	3	Green	Apterous	0	0	1	0	0	0	0		0	0	0	0	0	0	0	0	0	0	0	0	0	0	0	0	0	0	0	0	0	1	0	0	0	1	0	0	0	0
K15-12	2012-05-23	KU3	3	3	Green	Apterous	0	0	0	0	0	0	0		0	0	0	0	0	0	0	0	0	0	0	0	0	0	0	0	0	0	0	0	0	0	1	0	0	0	0	0	0	0
K15-13	2012-05-23	KU3	3	3	Green	Apterous	0	0	1	0	0	0	0		0	0	0	0	0	0	0	0	0	0	0	0	0	0	0	0	0	0	0	0	0	1	0	0	0	1	0	0	0	0
K15-14	2012-05-23	KU3	3	4	Green	Apterous	0	0	0	0	0	0	0		0	0	0	0	0	0	0	0	0	0	0	0	0	0	0	0	0	0	0	0	0	0	1	0	0	0	0	0	0	0
K15-15	2012-05-23	KU3	3	4	Green	Apterous	1	0	0	0	0	0	0		0	0	0	0	0	0	0	0	0	0	0	0	0	0	0	0	0	0	0	0	0	1	0	1	0	0	0	0	0	0
K15-16	2012-05-23	KU3	3	5	Green	Apterous	1	0	0	0	0	0	0		0	0	0	0	0	0	0	0	0	0	0	0	0	0	0	0	0	0	0	0	0	1	0	1	0	0	0	0	0	0
K15-17	2012-05-23	KU3	3	3	Green	Apterous	0	0	0	0	0	0	0		0	0	0	0	0	0	0	0	0	0	0	0	0	0	0	0	0	0	0	0	0	0	1	0	0	0	0	0	0	0
K15-18	2012-05-23	KU3	3	3	Green	Apterous	0	0	0	0	0	0	0		0	0	0	0	0	0	0	0	0	0	0	0	0	0	0	0	0	0	0	0	0	0	1	0	0	0	0	0	0	0
K15-19	2012-05-23	KU3	3	3	Green	Apterous	0	0	0	0	0	0	0		0	0	0	0	0	0	0	0	0	0	0	0	0	0	0	0	0	0	0	0	0	0	1	0	0	0	0	0	0	0
K15-2	2012-05-23	KU3	3	5	Green	Apterous	1	0	0	0	0	0	0		0	0	0	0	0	0	0	0	0	0	0	0	0	0	0	0	0	0	0	0	0	1	0	1	0	0	0	0	0	0
K15-20	2012-05-23	KU3	3	4	Green	Apterous	0	0	0	0	0	0	0		0	0	0	0	0	0	0	0	0	0	0	0	0	0	0	0	0	0	0	0	0	0	1	0	0	0	0	0	0	0
K15-21	2012-05-23	KU3	3	3	Green	Apterous	0	0	0	0	0	0	0		0	0	0	0	0	0	0	0	0	0	0	0	0	0	0	0	0	0	0	0	0	0	1	0	0	0	0	0	0	0
K15-22	2012-05-23	KU3	3	3	Green	Apterous	0	1	0	0	0	0	0		0	0	0	0	0	0	0	0	0	0	0	0	0	0	0	0	0	0	0	0	0	1	0	0	1	0	0	0	0	0
K15-23	2012-05-23	KU3	3	3	Green	Apterous	1	1	0	0	0	0	0		1	0	0	0	0	0	0	0	0	0	0	0	0	0	0	0	0	0	0	0	0	2	0	0	0	0	0	0	0	0
K15-24	2012-05-23	KU3	3	3	Green	Apterous	1	0	0	0	0	0	0		0	0	0	0	0	0	0	0	0	0	0	0	0	0	0	0	0	0	0	0	0	1	0	1	0	0	0	0	0	0
K15-3	2012-05-23	KU3	3	5	Green	Apterous	0	1	0	0	0	0	0		0	0	0	0	0	0	0	0	0	0	0	0	0	0	0	0	0	0	0	0	0	1	0	0	1	0	0	0	0	0
K15-4	2012-05-23	KU3	3	4	Green	Apterous	0	0	0	0	0	0	0		0	0	0	0	0	0	0	0	0	0	0	0	0	0	0	0	0	0	0	0	0	0	1	0	0	0	0	0	0	0
K15-5	2012-05-23	KU3	3	5	Green	Apterous	0	0	0	0	0	0	0		0	0	0	0	0	0	0	0	0	0	0	0	0	0	0	0	0	0	0	0	0	0	1	0	0	0	0	0	0	0
K15-6	2012-05-23	KU3	3	5	Green	Apterous	0	0	0	0	0	0	0		0	0	0	0	0	0	0	0	0	0	0	0	0	0	0	0	0	0	0	0	0	0	1	0	0	0	0	0	0	0
K15-7	2012-05-23	KU3	3	4	Green	Apterous	1	0	0	1	0	0	0		0	0	1	0	0	0	0	0	0	0	0	0	0	0	0	0	0	0	0	0	0	2	0	0	0	0	0	0	0	0
K15-8	2012-05-23	KU3	3	4	Green	Apterous	0	0	0	0	0	0	0		0	0	0	0	0	0	0	0	0	0	0	0	0	0	0	0	0	0	0	0	0	0	1	0	0	0	0	0	0	0
K15-9	2012-05-23	KU3	3	4	Green	Apterous	1	0	0	0	0	0	0		0	0	0	0	0	0	0	0	0	0	0	0	0	0	0	0	0	0	0	0	0	1	0	1	0	0	0	0	0	0
K16-1	2012-05-23	KU4	3	5	Green	Apterous	1	0	0	0	0	0	0		0	0	0	0	0	0	0	0	0	0	0	0	0	0	0	0	0	0	0	0	0	1	0	1	0	0	0	0	0	0
K16-11	2012-05-23	KU4	3	4	Green	Apterous	0	0	0	0	0	0	0		0	0	0	0	0	0	0	0	0	0	0	0	0	0	0	0	0	0	0	0	0	0	1	0	0	0	0	0	0	0
K16-12	2012-05-23	KU4	3	4	Green	Apterous	0	1	0	0	0	0	0		0	0	0	0	0	0	0	0	0	0	0	0	0	0	0	0	0	0	0	0	0	1	0	0	1	0	0	0	0	0
K16-13	2012-05-23	KU4	3	5	Green	Apterous	0	1	0	0	0	0	0		0	0	0	0	0	0	0	0	0	0	0	0	0	0	0	0	0	0	0	0	0	1	0	0	1	0	0	0	0	0
K16-14	2012-05-23	KU4	3	5	Green	Apterous	1	0	0	0	0	0	0		0	0	0	0	0	0	0	0	0	0	0	0	0	0	0	0	0	0	0	0	0	1	0	1	0	0	0	0	0	0
K16-15	2012-05-23	KU4	3	4	Green	Apterous	1	1	0	0	0	0	0		1	0	0	0	0	0	0	0	0	0	0	0	0	0	0	0	0	0	0	0	0	2	0	0	0	0	0	0	0	0
K16-18	2012-05-23	KU4	3	3	Green	Apterous	0	0	0	0	0	0	0		0	0	0	0	0	0	0	0	0	0	0	0	0	0	0	0	0	0	0	0	0	0	1	0	0	0	0	0	0	0
K16-19	2012-05-23	KU4	3	3	Green	Apterous	0	0	0	1	0	0	0		0	0	0	0	0	0	0	0	0	0	0	0	0	0	0	0	0	0	0	0	0	1	0	0	0	0	1	0	0	0
K16-2	2012-05-23	KU4	3	5	Green	Apterous	0	0	0	0	0	0	0		0	0	0	0	0	0	0	0	0	0	0	0	0	0	0	0	0	0	0	0	0	0	1	0	0	0	0	0	0	0
K16-20	2012-05-23	KU4	3	3	Green	Apterous	0	0	0	0	0	0	0		0	0	0	0	0	0	0	0	0	0	0	0	0	0	0	0	0	0	0	0	0	0	1	0	0	0	0	0	0	0
K16-21	2012-05-23	KU4	3	3	Green	Apterous	0	0	0	0	0	0	0		0	0	0	0	0	0	0	0	0	0	0	0	0	0	0	0	0	0	0	0	0	0	1	0	0	0	0	0	0	0
K16-22	2012-05-23	KU4	3	5	Green	Apterous	0	0	0	0	0	0	0		0	0	0	0	0	0	0	0	0	0	0	0	0	0	0	0	0	0	0	0	0	0	1	0	0	0	0	0	0	0
K16-23	2012-05-23	KU4	3	3	Red	Apterous	0	0	0	0	1	0	0		0	0	0	0	0	0	0	0	0	0	0	0	0	0	0	0	0	0	0	0	0	1	0	0	0	0	0	1	0	0
K16-24	2012-05-23	KU4	3	5	Red	Apterous	1	0	0	0	0	0	0		0	0	0	0	0	0	0	0	0	0	0	0	0	0	0	0	0	0	0	0	0	1	0	1	0	0	0	0	0	0
K16-3	2012-05-23	KU4	3	4	Green	Apterous	0	0	0	0	0	0	0		0	0	0	0	0	0	0	0	0	0	0	0	0	0	0	0	0	0	0	0	0	0	1	0	0	0	0	0	0	0
K16-4	2012-05-23	KU4	3	4	Green	Apterous	1	0	0	0	0	0	0		0	0	0	0	0	0	0	0	0	0	0	0	0	0	0	0	0	0	0	0	0	1	0	1	0	0	0	0	0	0
K16-5	2012-05-23	KU4	3	3	Green	Apterous	1	0	0	0	0	0	0		0	0	0	0	0	0	0	0	0	0	0	0	0	0	0	0	0	0	0	0	0	1	0	1	0	0	0	0	0	0
K16-6	2012-05-23	KU4	3	4	Green	Apterous	1	0	0	0	0	0	0		0	0	0	0	0	0	0	0	0	0	0	0	0	0	0	0	0	0	0	0	0	1	0	1	0	0	0	0	0	0
K16-7	2012-05-23	KU4	3	5	Green	Apterous	0	0	1	0	0	1	0		0	0	0	0	0	0	0	0	0	0	0	0	0	1	0	0	0	0	0	0	0	2	0	0	0	0	0	0	0	0
K16-8	2012-05-23	KU4	3	5	Green	Apterous	0	0	0	0	0	0	0		0	0	0	0	0	0	0	0	0	0	0	0	0	0	0	0	0	0	0	0	0	0	1	0	0	0	0	0	0	0
K16-9	2012-05-23	KU4	3	5	Green	Apterous	1	0	0	0	0	0	0		0	0	0	0	0	0	0	0	0	0	0	0	0	0	0	0	0	0	0	0	0	1	0	1	0	0	0	0	0	0
K16-10	2012-05-23	KU4	3	5	Green	Apterous	0	1	0	0	0	0	0		0	0	0	0	0	0	0	0	0	0	0	0	0	0	0	0	0	0	0	0	0	1	0	0	1	0	0	0	0	0
K17-19	2012-05-23	KU5	3	4	Red	Apterous	1	0	0	0	1	0	0		0	0	0	1	0	0	0	0	0	0	0	0	0	0	0	0	0	0	0	0	0	2	0	0	0	0	0	0	0	0
K17-1	2012-05-23	KU5	3	5	Green	Alate	0	0	0	0	0	0	0		0	0	0	0	0	0	0	0	0	0	0	0	0	0	0	0	0	0	0	0	0	0	1	0	0	0	0	0	0	0
K17-12	2012-05-23	KU5	3	3	Green	Apterous	1	0	0	0	1	0	0		0	0	0	1	0	0	0	0	0	0	0	0	0	0	0	0	0	0	0	0	0	2	0	0	0	0	0	0	0	0
K17-13	2012-05-23	KU5	3	5	Red	Apterous	1	0	0	0	0	0	0		0	0	0	0	0	0	0	0	0	0	0	0	0	0	0	0	0	0	0	0	0	1	0	1	0	0	0	0	0	0
K17-14	2012-05-23	KU5	3	5	Red	Apterous	0	0	0	0	0	0	0		0	0	0	0	0	0	0	0	0	0	0	0	0	0	0	0	0	0	0	0	0	0	1	0	0	0	0	0	0	0
K17-15	2012-05-23	KU5	3	4	Red	Apterous	1	0	0	1	0	0	0		0	0	1	0	0	0	0	0	0	0	0	0	0	0	0	0	0	0	0	0	0	2	0	0	0	0	0	0	0	0
K17-16	2012-05-23	KU5	3	3	Red	Apterous	0	0	0	0	1	0	0		0	0	0	0	0	0	0	0	0	0	0	0	0	0	0	0	0	0	0	0	0	1	0	0	0	0	0	1	0	0
K17-17	2012-05-23	KU5	3	3	Red	Apterous	1	0	0	0	0	0	0		0	0	0	0	0	0	0	0	0	0	0	0	0	0	0	0	0	0	0	0	0	1	0	1	0	0	0	0	0	0
K17-18	2012-05-23	KU5	3	5	Red	Apterous	1	0	0	0	0	0	0		0	0	0	0	0	0	0	0	0	0	0	0	0	0	0	0	0	0	0	0	0	1	0	1	0	0	0	0	0	0
K17-20	2012-05-23	KU5	3	4	Red	Apterous	1	0	0	0	0	0	0		0	0	0	0	0	0	0	0	0	0	0	0	0	0	0	0	0	0	0	0	0	1	0	1	0	0	0	0	0	0
K17-22	2012-05-23	KU5	3	4	Red	Apterous	1	0	0	1	0	0	0		0	0	1	0	0	0	0	0	0	0	0	0	0	0	0	0	0	0	0	0	0	2	0	0	0	0	0	0	0	0
K17-23	2012-05-23	KU5	3	3	Green	Apterous	1	0	0	0	0	0	0		0	0	0	0	0	0	0	0	0	0	0	0	0	0	0	0	0	0	0	0	0	1	0	1	0	0	0	0	0	0
K17-24	2012-05-23	KU5	3	3	Green	Apterous	1	0	0	0	0	0	0		0	0	0	0	0	0	0	0	0	0	0	0	0	0	0	0	0	0	0	0	0	1	0	1	0	0	0	0	0	0
K17-3	2012-05-23	KU5	3	5	Green	Alate	0	0	0	1	0	0	0		0	0	0	0	0	0	0	0	0	0	0	0	0	0	0	0	0	0	0	0	0	1	0	0	0	0	1	0	0	0
K17-4	2012-05-23	KU5	3	3	Green	Apterous	0	0	0	0	0	0	0		0	0	0	0	0	0	0	0	0	0	0	0	0	0	0	0	0	0	0	0	0	0	1	0	0	0	0	0	0	0
K17-5	2012-05-23	KU5	3	5	Green	Alate	0	0	0	0	0	1	0		0	0	0	0	0	0	0	0	0	0	0	0	0	0	0	0	0	0	0	0	0	1	0	0	0	0	0	0	1	0
K17-6	2012-05-23	KU5	3	5	Green	Apterous	1	0	0	1	0	0	0		0	0	1	0	0	0	0	0	0	0	0	0	0	0	0	0	0	0	0	0	0	2	0	0	0	0	0	0	0	0
K17-7	2012-05-23	KU5	3	4	Green	Apterous	1	0	0	0	0	0	0		0	0	0	0	0	0	0	0	0	0	0	0	0	0	0	0	0	0	0	0	0	1	0	1	0	0	0	0	0	0
K17-8	2012-05-23	KU5	3	4	Green	Apterous	1	0	0	0	1	0	0		0	0	0	1	0	0	0	0	0	0	0	0	0	0	0	0	0	0	0	0	0	2	0	0	0	0	0	0	0	0
K17-9	2012-05-23	KU5	3	4	Green	Apterous	0	0	0	0	0	0	0		0	0	0	0	0	0	0	0	0	0	0	0	0	0	0	0	0	0	0	0	0	0	1	0	0	0	0	0	0	0
K17-10	2012-05-23	KU5	3	3	Green	Apterous	0	0	0	0	0	0	0		0	0	0	0	0	0	0	0	0	0	0	0	0	0	0	0	0	0	0	0	0	0	1	0	0	0	0	0	0	0
K17-11	2012-05-23	KU5	3	3	Green	Apterous	0	0	0	0	0	0	0		0	0	0	0	0	0	0	0	0	0	0	0	0	0	0	0	0	0	0	0	0	0	1	0	0	0	0	0	0	0
K17-2	2012-05-23	KU5	3	5	Green	Apterous	0	0	0	0	0	0	0		0	0	0	0	0	0	0	0	0	0	0	0	0	0	0	0	0	0	0	0	0	0	1	0	0	0	0	0	0	0
K17-21	2012-05-23	KU5	3	4	Red	Apterous	0	0	0	0	0	0	0		0	0	0	0	0	0	0	0	0	0	0	0	0	0	0	0	0	0	0	0	0	0	1	0	0	0	0	0	0	0
K18-10	2012-05-23	KU6	3	4	Green	Apterous	0	0	0	0	1	1	0		0	0	0	0	0	0	0	0	0	0	0	0	0	0	0	0	0	0	1	0	0	2	0	0	0	0	0	0	0	0
K18-13	2012-05-23	KU6	3	5	Green	Apterous	1	0	0	0	0	0	0		0	0	0	0	0	0	0	0	0	0	0	0	0	0	0	0	0	0	0	0	0	1	0	1	0	0	0	0	0	0
K18-15	2012-05-23	KU6	3	5	Green	Apterous	1	0	0	1	0	0	0		0	0	1	0	0	0	0	0	0	0	0	0	0	0	0	0	0	0	0	0	0	2	0	0	0	0	0	0	0	0
K18-16	2012-05-23	KU6	3	5	Green	Alate	0	0	0	0	0	0	0		0	0	0	0	0	0	0	0	0	0	0	0	0	0	0	0	0	0	0	0	0	0	1	0	0	0	0	0	0	0
K18-17	2012-05-23	KU6	3	5	Green	Alate	0	0	0	0	0	0	1		0	0	0	0	0	0	0	0	0	0	0	0	0	0	0	0	0	0	0	0	0	1	0	0	0	0	0	0	0	1
K18-18	2012-05-23	KU6	3	3	Green	Apterous	0	0	0	0	0	0	0		0	0	0	0	0	0	0	0	0	0	0	0	0	0	0	0	0	0	0	0	0	0	1	0	0	0	0	0	0	0
K18-19	2012-05-23	KU6	3	3	Green	Apterous	1	0	0	0	0	1	0		0	0	0	0	1	0	0	0	0	0	0	0	0	0	0	0	0	0	0	0	0	2	0	0	0	0	0	0	0	0
K18-2	2012-05-23	KU6	3	5	Green	Apterous	1	1	0	0	1	0	0		1	0	0	1	0	0	0	0	1	0	0	0	0	0	0	0	0	0	0	0	0	3	0	0	0	0	0	0	0	0
K18-20	2012-05-23	KU6	3	3	Green	Apterous	0	0	0	0	0	0	0		0	0	0	0	0	0	0	0	0	0	0	0	0	0	0	0	0	0	0	0	0	0	1	0	0	0	0	0	0	0
K18-21	2012-05-23	KU6	3	2	Green	Apterous	1	0	0	1	0	0	0		0	0	1	0	0	0	0	0	0	0	0	0	0	0	0	0	0	0	0	0	0	2	0	0	0	0	0	0	0	0
K18-22	2012-05-23	KU6	3	2	Green	Apterous	0	0	0	0	0	0	0		0	0	0	0	0	0	0	0	0	0	0	0	0	0	0	0	0	0	0	0	0	0	1	0	0	0	0	0	0	0
K18-23	2012-05-23	KU6	3	2	Green	Apterous	0	0	0	0	0	0	0		0	0	0	0	0	0	0	0	0	0	0	0	0	0	0	0	0	0	0	0	0	0	1	0	0	0	0	0	0	0
K18-24	2012-05-23	KU6	3	2	Green	Apterous	0	0	0	0	0	0	0		0	0	0	0	0	0	0	0	0	0	0	0	0	0	0	0	0	0	0	0	0	0	1	0	0	0	0	0	0	0
K18-3	2012-05-23	KU6	3	5	Green	Apterous	1	0	0	1	0	0	0		0	0	1	0	0	0	0	0	0	0	0	0	0	0	0	0	0	0	0	0	0	2	0	0	0	0	0	0	0	0
K18-4	2012-05-23	KU6	3	5	Green	Apterous	1	0	1	0	0	0	0		0	1	0	0	0	0	0	0	0	0	0	0	0	0	0	0	0	0	0	0	0	2	0	0	0	0	0	0	0	0
K18-8	2012-05-23	KU6	3	5	Green	Apterous	0	0	0	0	1	0	0		0	0	0	0	0	0	0	0	0	0	0	0	0	0	0	0	0	0	0	0	0	1	0	0	0	0	0	1	0	0
K18-9	2012-05-23	KU6	3	4	Green	Apterous	0	0	0	0	1	0	1		0	0	0	0	0	0	0	0	0	0	0	0	0	0	0	0	0	0	0	1	0	2	0	0	0	0	0	0	0	0
K18-7	2012-05-23	KU6	3	5	Green	Apterous	0	0	0	0	0	1	0		0	0	0	0	0	0	0	0	0	0	0	0	0	0	0	0	0	0	0	0	0	1	0	0	0	0	0	0	1	0
K18-1	2012-05-23	KU6	3	5	Green	Apterous	0	0	0	1	0	0	0		0	0	0	0	0	0	0	0	0	0	0	0	0	0	0	0	0	0	0	0	0	1	0	0	0	0	1	0	0	0
K18-12	2012-05-23	KU6	3	5	Green	Alate	1	0	0	1	0	0	0		0	0	1	0	0	0	0	0	0	0	0	0	0	0	0	0	0	0	0	0	0	2	0	0	0	0	0	0	0	0
K18-5	2012-05-23	KU6	3	5	Green	Apterous	0	1	0	0	0	0	0		0	0	0	0	0	0	0	0	0	0	0	0	0	0	0	0	0	0	0	0	0	1	0	0	1	0	0	0	0	0
K18-6	2012-05-23	KU6	3	5	Green	Apterous	0	0	1	0	0	1	0		0	0	0	0	0	0	0	0	0	0	0	0	0	1	0	0	0	0	0	0	0	2	0	0	0	0	0	0	0	0
K19-15	2012-06-06	KU1	4	4	Green	Apterous	0	0	0	1	1	0	0		0	0	0	0	0	0	0	0	0	0	0	0	0	0	0	1	0	0	0	0	0	2	0	0	0	0	0	0	0	0
K19-10	2012-06-06	KU1	4	4	Green	Apterous	0	0	0	1	0	0	0		0	0	0	0	0	0	0	0	0	0	0	0	0	0	0	0	0	0	0	0	0	1	0	0	0	0	1	0	0	0
K19-12	2012-06-06	KU1	4	5	Green	Apterous	1	0	0	0	0	0	0		0	0	0	0	0	0	0	0	0	0	0	0	0	0	0	0	0	0	0	0	0	1	0	1	0	0	0	0	0	0
K19-13	2012-06-06	KU1	4	5	Green	Apterous	1	0	0	0	0	0	0		0	0	0	0	0	0	0	0	0	0	0	0	0	0	0	0	0	0	0	0	0	1	0	1	0	0	0	0	0	0
K19-14	2012-06-06	KU1	4	5	Green	Apterous	1	0	0	0	0	0	0		0	0	0	0	0	0	0	0	0	0	0	0	0	0	0	0	0	0	0	0	0	1	0	1	0	0	0	0	0	0
K19-16	2012-06-06	KU1	4	5	Green	Apterous	1	0	0	0	0	0	0		0	0	0	0	0	0	0	0	0	0	0	0	0	0	0	0	0	0	0	0	0	1	0	1	0	0	0	0	0	0
K19-17	2012-06-06	KU1	4	5	Green	Alate	1	0	0	1	0	0	0		0	0	1	0	0	0	0	0	0	0	0	0	0	0	0	0	0	0	0	0	0	2	0	0	0	0	0	0	0	0
K19-18	2012-06-06	KU1	4	4	Green	Apterous	0	0	0	1	0	0	0		0	0	0	0	0	0	0	0	0	0	0	0	0	0	0	0	0	0	0	0	0	1	0	0	0	0	1	0	0	0
K19-19	2012-06-06	KU1	4	4	Green	Apterous	0	0	0	0	0	0	0		0	0	0	0	0	0	0	0	0	0	0	0	0	0	0	0	0	0	0	0	0	0	1	0	0	0	0	0	0	0
K19-2	2012-06-06	KU1	4	5	Green	Apterous	0	0	0	0	0	0	0		0	0	0	0	0	0	0	0	0	0	0	0	0	0	0	0	0	0	0	0	0	0	1	0	0	0	0	0	0	0
K19-21	2012-06-06	KU1	4	4	Green	Apterous	0	0	0	1	0	0	0		0	0	0	0	0	0	0	0	0	0	0	0	0	0	0	0	0	0	0	0	0	1	0	0	0	0	1	0	0	0
K19-24	2012-06-06	KU1	4	2	Green	Apterous	0	0	0	0	0	1	0		0	0	0	0	0	0	0	0	0	0	0	0	0	0	0	0	0	0	0	0	0	1	0	0	0	0	0	0	1	0
K19-3	2012-06-06	KU1	4	5	Green	Apterous	0	1	0	0	0	0	0		0	0	0	0	0	0	0	0	0	0	0	0	0	0	0	0	0	0	0	0	0	1	0	0	1	0	0	0	0	0
K19-4	2012-06-06	KU1	4	5	Green	Apterous	1	0	0	0	0	0	0		0	0	0	0	0	0	0	0	0	0	0	0	0	0	0	0	0	0	0	0	0	1	0	1	0	0	0	0	0	0
K19-5	2012-06-06	KU1	4	5	Green	Apterous	0	0	1	0	0	1	0		0	0	0	0	0	0	0	0	0	0	0	0	0	1	0	0	0	0	0	0	0	2	0	0	0	0	0	0	0	0
K19-6	2012-06-06	KU1	4	5	Green	Apterous	0	0	0	0	0	0	0		0	0	0	0	0	0	0	0	0	0	0	0	0	0	0	0	0	0	0	0	0	0	1	0	0	0	0	0	0	0
K19-7	2012-06-06	KU1	4	5	Green	Apterous	0	0	1	0	0	1	0		0	0	0	0	0	0	0	0	0	0	0	0	0	1	0	0	0	0	0	0	0	2	0	0	0	0	0	0	0	0
K19-8	2012-06-06	KU1	4	5	Green	Apterous	1	0	0	1	0	0	0		0	0	1	0	0	0	0	0	0	0	0	0	0	0	0	0	0	0	0	0	0	2	0	0	0	0	0	0	0	0
K19-9	2012-06-06	KU1	4	4	Green	Apterous	1	0	0	0	0	0	0		0	0	0	0	0	0	0	0	0	0	0	0	0	0	0	0	0	0	0	0	0	1	0	1	0	0	0	0	0	0
K19-1	2012-06-06	KU1	4	5	Green	Apterous	0	0	1	0	0	0	0		0	0	0	0	0	0	0	0	0	0	0	0	0	0	0	0	0	0	0	0	0	1	0	0	0	1	0	0	0	0
K19-20	2012-06-06	KU1	4	4	Green	Apterous	0	0	0	0	0	0	0		0	0	0	0	0	0	0	0	0	0	0	0	0	0	0	0	0	0	0	0	0	0	1	0	0	0	0	0	0	0
K19-22	2012-06-06	KU1	4	4	Green	Apterous	0	0	0	0	0	0	0		0	0	0	0	0	0	0	0	0	0	0	0	0	0	0	0	0	0	0	0	0	0	1	0	0	0	0	0	0	0
K19-23	2012-06-06	KU1	4	3	Green	Apterous	0	0	0	1	0	0	0		0	0	0	0	0	0	0	0	0	0	0	0	0	0	0	0	0	0	0	0	0	1	0	0	0	0	1	0	0	0
K20-1	2012-06-06	KU2	4	5	Green	Apterous	0	1	0	0	1	0	0		0	0	0	0	0	0	0	0	1	0	0	0	0	0	0	0	0	0	0	0	0	2	0	0	0	0	0	0	0	0
K20-11	2012-06-06	KU2	4	5	Green	Apterous	0	0	0	1	0	0	0		0	0	0	0	0	0	0	0	0	0	0	0	0	0	0	0	0	0	0	0	0	1	0	0	0	0	1	0	0	0
K20-14	2012-06-06	KU2	4	4	Green	Apterous	0	0	0	0	1	0	0		0	0	0	0	0	0	0	0	0	0	0	0	0	0	0	0	0	0	0	0	0	1	0	0	0	0	0	1	0	0
K20-16	2012-06-06	KU2	4	4	Green	Apterous	0	0	0	0	0	0	0		0	0	0	0	0	0	0	0	0	0	0	0	0	0	0	0	0	0	0	0	0	0	1	0	0	0	0	0	0	0
K20-17	2012-06-06	KU2	4	5	Green	Apterous	0	0	0	0	0	0	0		0	0	0	0	0	0	0	0	0	0	0	0	0	0	0	0	0	0	0	0	0	0	1	0	0	0	0	0	0	0
K20-18	2012-06-06	KU2	4	4	Green	Apterous	0	0	0	0	0	0	0		0	0	0	0	0	0	0	0	0	0	0	0	0	0	0	0	0	0	0	0	0	0	1	0	0	0	0	0	0	0
K20-19	2012-06-06	KU2	4	4	Green	Apterous	0	0	0	0	0	0	0		0	0	0	0	0	0	0	0	0	0	0	0	0	0	0	0	0	0	0	0	0	0	1	0	0	0	0	0	0	0
K20-20	2012-06-06	KU2	4	4	Green	Apterous	0	0	0	0	1	0	0		0	0	0	0	0	0	0	0	0	0	0	0	0	0	0	0	0	0	0	0	0	1	0	0	0	0	0	1	0	0
K20-21	2012-06-06	KU2	4	5	Green	Apterous	0	0	0	1	0	0	0		0	0	0	0	0	0	0	0	0	0	0	0	0	0	0	0	0	0	0	0	0	1	0	0	0	0	1	0	0	0
K20-22	2012-06-06	KU2	4	3	Green	Apterous	0	0	0	1	0	0	0		0	0	0	0	0	0	0	0	0	0	0	0	0	0	0	0	0	0	0	0	0	1	0	0	0	0	1	0	0	0
K20-23	2012-06-06	KU2	4	2	Green	Apterous	0	0	0	0	0	0	0		0	0	0	0	0	0	0	0	0	0	0	0	0	0	0	0	0	0	0	0	0	0	1	0	0	0	0	0	0	0
K20-24	2012-06-06	KU2	4	2	Green	Apterous	0	1	0	0	0	0	0		0	0	0	0	0	0	0	0	0	0	0	0	0	0	0	0	0	0	0	0	0	1	0	0	1	0	0	0	0	0
K20-4	2012-06-06	KU2	4	5	Green	Apterous	0	0	0	0	0	0	1		0	0	0	0	0	0	0	0	0	0	0	0	0	0	0	0	0	0	0	0	0	1	0	0	0	0	0	0	0	1
K20-6	2012-06-06	KU2	4	5	Green	Apterous	1	0	0	0	0	0	0		0	0	0	0	0	0	0	0	0	0	0	0	0	0	0	0	0	0	0	0	0	1	0	1	0	0	0	0	0	0
K20-7	2012-06-06	KU2	4	5	Green	Apterous	0	0	0	0	0	0	1		0	0	0	0	0	0	0	0	0	0	0	0	0	0	0	0	0	0	0	0	0	1	0	0	0	0	0	0	0	1
K20-8	2012-06-06	KU2	4	3	Green	Apterous	0	0	0	1	0	0	0		0	0	0	0	0	0	0	0	0	0	0	0	0	0	0	0	0	0	0	0	0	1	0	0	0	0	1	0	0	0
K20-9	2012-06-06	KU2	4	3	Green	Apterous	0	0	0	0	0	1	0		0	0	0	0	0	0	0	0	0	0	0	0	0	0	0	0	0	0	0	0	0	1	0	0	0	0	0	0	1	0
K20-10	2012-06-06	KU2	4	5	Green	Apterous	0	0	0	1	0	0	0		0	0	0	0	0	0	0	0	0	0	0	0	0	0	0	0	0	0	0	0	0	1	0	0	0	0	1	0	0	0
K20-15	2012-06-06	KU2	4	4	Green	Apterous	0	0	0	0	0	0	0		0	0	0	0	0	0	0	0	0	0	0	0	0	0	0	0	0	0	0	0	0	0	1	0	0	0	0	0	0	0
K20-2	2012-06-06	KU2	4	5	Green	Apterous	0	0	0	0	0	0	1		0	0	0	0	0	0	0	0	0	0	0	0	0	0	0	0	0	0	0	0	0	1	0	0	0	0	0	0	0	1
K20-3	2012-06-06	KU2	4	5	Green	Apterous	0	1	0	0	0	0	0		0	0	0	0	0	0	0	0	0	0	0	0	0	0	0	0	0	0	0	0	0	1	0	0	1	0	0	0	0	0
K20-5	2012-06-06	KU2	4	5	Green	Apterous	0	1	0	0	0	0	0		0	0	0	0	0	0	0	0	0	0	0	0	0	0	0	0	0	0	0	0	0	1	0	0	1	0	0	0	0	0
K21-1	2012-06-06	KU3	4	5	Green	Apterous	0	1	0	0	0	0	0		0	0	0	0	0	0	0	0	0	0	0	0	0	0	0	0	0	0	0	0	0	1	0	0	1	0	0	0	0	0
K21-10	2012-06-06	KU3	4	5	Green	Apterous	1	0	0	0	0	0	0		0	0	0	0	0	0	0	0	0	0	0	0	0	0	0	0	0	0	0	0	0	1	0	1	0	0	0	0	0	0
K21-11	2012-06-06	KU3	4	5	Green	Apterous	0	0	0	0	0	0	0		0	0	0	0	0	0	0	0	0	0	0	0	0	0	0	0	0	0	0	0	0	0	1	0	0	0	0	0	0	0
K21-12	2012-06-06	KU3	4	4	Green	Apterous	1	0	0	0	0	0	0		0	0	0	0	0	0	0	0	0	0	0	0	0	0	0	0	0	0	0	0	0	1	0	1	0	0	0	0	0	0
K21-13	2012-06-06	KU3	4	3	Green	Apterous	0	1	0	0	0	0	0		0	0	0	0	0	0	0	0	0	0	0	0	0	0	0	0	0	0	0	0	0	1	0	0	1	0	0	0	0	0
K21-14	2012-06-06	KU3	4	3	Green	Apterous	0	0	0	0	0	0	0		0	0	0	0	0	0	0	0	0	0	0	0	0	0	0	0	0	0	0	0	0	0	1	0	0	0	0	0	0	0
K21-15	2012-06-06	KU3	4	3	Green	Apterous	0	0	0	0	0	0	0		0	0	0	0	0	0	0	0	0	0	0	0	0	0	0	0	0	0	0	0	0	0	1	0	0	0	0	0	0	0
K21-16	2012-06-06	KU3	4	2	Green	Apterous	0	0	0	0	0	0	0		0	0	0	0	0	0	0	0	0	0	0	0	0	0	0	0	0	0	0	0	0	0	1	0	0	0	0	0	0	0
K21-17	2012-06-06	KU3	4	4	Green	Apterous	1	0	0	0	0	0	0		0	0	0	0	0	0	0	0	0	0	0	0	0	0	0	0	0	0	0	0	0	1	0	1	0	0	0	0	0	0
K21-18	2012-06-06	KU3	4	3	Green	Apterous	0	0	0	0	0	0	0		0	0	0	0	0	0	0	0	0	0	0	0	0	0	0	0	0	0	0	0	0	0	1	0	0	0	0	0	0	0
K21-19	2012-06-06	KU3	4	3	Green	Apterous	0	0	0	0	0	0	0		0	0	0	0	0	0	0	0	0	0	0	0	0	0	0	0	0	0	0	0	0	0	1	0	0	0	0	0	0	0
K21-2	2012-06-06	KU3	4	5	Green	Apterous	0	0	0	0	0	0	0		0	0	0	0	0	0	0	0	0	0	0	0	0	0	0	0	0	0	0	0	0	0	1	0	0	0	0	0	0	0
K21-20	2012-06-06	KU3	4	3	Green	Apterous	1	1	0	0	0	0	0		1	0	0	0	0	0	0	0	0	0	0	0	0	0	0	0	0	0	0	0	0	2	0	0	0	0	0	0	0	0
K21-21	2012-06-06	KU3	4	3	Green	Apterous	0	0	0	0	0	0	0		0	0	0	0	0	0	0	0	0	0	0	0	0	0	0	0	0	0	0	0	0	0	1	0	0	0	0	0	0	0
K21-23	2012-06-06	KU3	4	3	Green	Apterous	0	0	0	0	0	0	0		0	0	0	0	0	0	0	0	0	0	0	0	0	0	0	0	0	0	0	0	0	0	1	0	0	0	0	0	0	0
K21-24	2012-06-06	KU3	4	3	Green	Apterous	0	0	0	0	0	0	0		0	0	0	0	0	0	0	0	0	0	0	0	0	0	0	0	0	0	0	0	0	0	1	0	0	0	0	0	0	0
K21-3	2012-06-06	KU3	4	5	Green	Apterous	0	0	0	0	0	0	0		0	0	0	0	0	0	0	0	0	0	0	0	0	0	0	0	0	0	0	0	0	0	1	0	0	0	0	0	0	0
K21-4	2012-06-06	KU3	4	5	Green	Apterous	1	1	0	0	0	0	0		1	0	0	0	0	0	0	0	0	0	0	0	0	0	0	0	0	0	0	0	0	2	0	0	0	0	0	0	0	0
K21-5	2012-06-06	KU3	4	5	Green	Alate	0	0	0	0	0	0	0		0	0	0	0	0	0	0	0	0	0	0	0	0	0	0	0	0	0	0	0	0	0	1	0	0	0	0	0	0	0
K21-6	2012-06-06	KU3	4	5	Green	Apterous	0	0	0	0	0	0	0		0	0	0	0	0	0	0	0	0	0	0	0	0	0	0	0	0	0	0	0	0	0	1	0	0	0	0	0	0	0
K21-7	2012-06-06	KU3	4	5	Green	Apterous	0	0	0	0	0	0	0		0	0	0	0	0	0	0	0	0	0	0	0	0	0	0	0	0	0	0	0	0	0	1	0	0	0	0	0	0	0
K21-8	2012-06-06	KU3	4	5	Green	Apterous	1	0	0	0	0	0	0		0	0	0	0	0	0	0	0	0	0	0	0	0	0	0	0	0	0	0	0	0	1	0	1	0	0	0	0	0	0
K21-9	2012-06-06	KU3	4	5	Green	Apterous	1	0	0	0	0	0	0		0	0	0	0	0	0	0	0	0	0	0	0	0	0	0	0	0	0	0	0	0	1	0	1	0	0	0	0	0	0
K21-22	2012-06-06	KU3	4	3	Green	Apterous	0	0	0	0	0	0	0		0	0	0	0	0	0	0	0	0	0	0	0	0	0	0	0	0	0	0	0	0	0	1	0	0	0	0	0	0	0
K22-1	2012-06-06	KU4	4	4	Green	Apterous	1	0	0	1	0	0	0		0	0	1	0	0	0	0	0	0	0	0	0	0	0	0	0	0	0	0	0	0	2	0	0	0	0	0	0	0	0
K22-10	2012-06-06	KU4	4	5	Green	Apterous	0	0	0	0	0	0	0		0	0	0	0	0	0	0	0	0	0	0	0	0	0	0	0	0	0	0	0	0	0	1	0	0	0	0	0	0	0
K22-11	2012-06-06	KU4	4	5	Green	Apterous	1	0	0	0	1	0	0		0	0	0	1	0	0	0	0	0	0	0	0	0	0	0	0	0	0	0	0	0	2	0	0	0	0	0	0	0	0
K22-12	2012-06-06	KU4	4	5	Green	Apterous	0	0	0	0	0	0	0		0	0	0	0	0	0	0	0	0	0	0	0	0	0	0	0	0	0	0	0	0	0	1	0	0	0	0	0	0	0
K22-13	2012-06-06	KU4	4	5	Green	Apterous	0	1	0	0	0	0	0		0	0	0	0	0	0	0	0	0	0	0	0	0	0	0	0	0	0	0	0	0	1	0	0	1	0	0	0	0	0
K22-14	2012-06-06	KU4	4	5	Green	Apterous	0	0	0	0	0	0	0		0	0	0	0	0	0	0	0	0	0	0	0	0	0	0	0	0	0	0	0	0	0	1	0	0	0	0	0	0	0
K22-15	2012-06-06	KU4	4	5	Green	Apterous	1	0	0	0	0	0	0		0	0	0	0	0	0	0	0	0	0	0	0	0	0	0	0	0	0	0	0	0	1	0	1	0	0	0	0	0	0
K22-16	2012-06-06	KU4	4	4	Green	Apterous	0	1	0	0	0	0	0		0	0	0	0	0	0	0	0	0	0	0	0	0	0	0	0	0	0	0	0	0	1	0	0	1	0	0	0	0	0
K22-17	2012-06-06	KU4	4	5	Green	Apterous	0	0	1	0	0	1	0		0	0	0	0	0	0	0	0	0	0	0	0	0	1	0	0	0	0	0	0	0	2	0	0	0	0	0	0	0	0
K22-19	2012-06-06	KU4	4	4	Green	Apterous	0	1	0	0	0	0	0		0	0	0	0	0	0	0	0	0	0	0	0	0	0	0	0	0	0	0	0	0	1	0	0	1	0	0	0	0	0
K22-2	2012-06-06	KU4	4	5	Green	Apterous	0	0	0	0	0	1	0		0	0	0	0	0	0	0	0	0	0	0	0	0	0	0	0	0	0	0	0	0	1	0	0	0	0	0	0	1	0
K22-21	2012-06-06	KU4	4	5	Green	Apterous	1	1	0	0	0	0	0		1	0	0	0	0	0	0	0	0	0	0	0	0	0	0	0	0	0	0	0	0	2	0	0	0	0	0	0	0	0
K22-22	2012-06-06	KU4	4	3	Green	Apterous	0	1	0	0	0	0	0		0	0	0	0	0	0	0	0	0	0	0	0	0	0	0	0	0	0	0	0	0	1	0	0	1	0	0	0	0	0
K22-23	2012-06-06	KU4	4	3	Green	Apterous	0	0	0	0	1	0	0		0	0	0	0	0	0	0	0	0	0	0	0	0	0	0	0	0	0	0	0	0	1	0	0	0	0	0	1	0	0
K22-24	2012-06-06	KU4	4	3	Green	Apterous	0	0	0	0	0	0	0		0	0	0	0	0	0	0	0	0	0	0	0	0	0	0	0	0	0	0	0	0	0	1	0	0	0	0	0	0	0
K22-3	2012-06-06	KU4	4	5	Green	Apterous	0	1	0	0	0	0	0		0	0	0	0	0	0	0	0	0	0	0	0	0	0	0	0	0	0	0	0	0	1	0	0	1	0	0	0	0	0
K22-5	2012-06-06	KU4	4	5	Green	Apterous	1	0	0	1	0	0	0		0	0	1	0	0	0	0	0	0	0	0	0	0	0	0	0	0	0	0	0	0	2	0	0	0	0	0	0	0	0
K22-6	2012-06-06	KU4	4	4	Green	Apterous	1	0	0	0	0	0	0		0	0	0	0	0	0	0	0	0	0	0	0	0	0	0	0	0	0	0	0	0	1	0	1	0	0	0	0	0	0
K22-7	2012-06-06	KU4	4	3	Green	Apterous	0	1	0	0	0	0	0		0	0	0	0	0	0	0	0	0	0	0	0	0	0	0	0	0	0	0	0	0	1	0	0	1	0	0	0	0	0
K22-8	2012-06-06	KU4	4	5	Green	Apterous	1	0	0	0	0	0	0		0	0	0	0	0	0	0	0	0	0	0	0	0	0	0	0	0	0	0	0	0	1	0	1	0	0	0	0	0	0
K22-9	2012-06-06	KU4	4	4	Green	Apterous	1	0	0	0	0	0	0		0	0	0	0	0	0	0	0	0	0	0	0	0	0	0	0	0	0	0	0	0	1	0	1	0	0	0	0	0	0
K22-20	2012-06-06	KU4	4	5	Green	Alate	0	1	0	0	0	0	0		0	0	0	0	0	0	0	0	0	0	0	0	0	0	0	0	0	0	0	0	0	1	0	0	1	0	0	0	0	0
K23-1	2012-06-06	KU5	4	5	Green	Apterous	0	0	0	0	0	0	0		0	0	0	0	0	0	0	0	0	0	0	0	0	0	0	0	0	0	0	0	0	0	1	0	0	0	0	0	0	0
K23-10	2012-06-06	KU5	4	5	Green	Apterous	0	1	0	0	0	0	0		0	0	0	0	0	0	0	0	0	0	0	0	0	0	0	0	0	0	0	0	0	1	0	0	1	0	0	0	0	0
K23-11	2012-06-06	KU5	4	4	Green	Apterous	0	0	0	1	0	0	0		0	0	0	0	0	0	0	0	0	0	0	0	0	0	0	0	0	0	0	0	0	1	0	0	0	0	1	0	0	0
K23-12	2012-06-06	KU5	4	4	Green	Apterous	1	0	0	1	0	0	0		0	0	1	0	0	0	0	0	0	0	0	0	0	0	0	0	0	0	0	0	0	2	0	0	0	0	0	0	0	0
K23-13	2012-06-06	KU5	4	5	Green	Apterous	0	0	0	0	0	0	0		0	0	0	0	0	0	0	0	0	0	0	0	0	0	0	0	0	0	0	0	0	0	1	0	0	0	0	0	0	0
K23-14	2012-06-06	KU5	4	4	Green	Apterous	0	0	0	1	1	0	0		0	0	0	0	0	0	0	0	0	0	0	0	0	0	0	1	0	0	0	0	0	2	0	0	0	0	0	0	0	0
K23-16	2012-06-06	KU5	4	3	Green	Apterous	0	0	0	0	0	0	0		0	0	0	0	0	0	0	0	0	0	0	0	0	0	0	0	0	0	0	0	0	0	1	0	0	0	0	0	0	0
K23-17	2012-06-06	KU5	4	2	Green	Apterous	0	0	0	0	0	0	0		0	0	0	0	0	0	0	0	0	0	0	0	0	0	0	0	0	0	0	0	0	0	1	0	0	0	0	0	0	0
K23-18	2012-06-06	KU5	4	2	Green	Apterous	0	0	0	0	0	0	0		0	0	0	0	0	0	0	0	0	0	0	0	0	0	0	0	0	0	0	0	0	0	1	0	0	0	0	0	0	0
K23-19	2012-06-06	KU5	4	3	Green	Apterous	0	0	0	0	1	0	0		0	0	0	0	0	0	0	0	0	0	0	0	0	0	0	0	0	0	0	0	0	1	0	0	0	0	0	1	0	0
K23-2	2012-06-06	KU5	4	5	Green	Apterous	0	0	0	0	0	0	0		0	0	0	0	0	0	0	0	0	0	0	0	0	0	0	0	0	0	0	0	0	0	1	0	0	0	0	0	0	0
K23-20	2012-06-06	KU5	4	3	Green	Apterous	0	0	0	0	0	0	0		0	0	0	0	0	0	0	0	0	0	0	0	0	0	0	0	0	0	0	0	0	0	1	0	0	0	0	0	0	0
K23-21	2012-06-06	KU5	4	2	Green	Apterous	0	0	0	0	0	0	0		0	0	0	0	0	0	0	0	0	0	0	0	0	0	0	0	0	0	0	0	0	0	1	0	0	0	0	0	0	0
K23-22	2012-06-06	KU5	4	2	Green	Apterous	0	0	0	0	0	0	0		0	0	0	0	0	0	0	0	0	0	0	0	0	0	0	0	0	0	0	0	0	0	1	0	0	0	0	0	0	0
K23-24	2012-06-06	KU5	4	2	Green	Apterous	0	0	0	0	0	0	0		0	0	0	0	0	0	0	0	0	0	0	0	0	0	0	0	0	0	0	0	0	0	1	0	0	0	0	0	0	0
K23-3	2012-06-06	KU5	4	5	Green	Apterous	0	0	0	1	0	0	0		0	0	0	0	0	0	0	0	0	0	0	0	0	0	0	0	0	0	0	0	0	1	0	0	0	0	1	0	0	0
K23-4	2012-06-06	KU5	4	5	Green	Apterous	1	0	0	0	0	0	0		0	0	0	0	0	0	0	0	0	0	0	0	0	0	0	0	0	0	0	0	0	1	0	1	0	0	0	0	0	0
K23-5	2012-06-06	KU5	4	5	Green	Apterous	1	0	0	0	0	0	0		0	0	0	0	0	0	0	0	0	0	0	0	0	0	0	0	0	0	0	0	0	1	0	1	0	0	0	0	0	0
K23-6	2012-06-06	KU5	4	5	Green	Apterous	1	0	0	0	0	0	0		0	0	0	0	0	0	0	0	0	0	0	0	0	0	0	0	0	0	0	0	0	1	0	1	0	0	0	0	0	0
K23-7	2012-06-06	KU5	4	5	Green	Apterous	1	0	0	0	0	0	0		0	0	0	0	0	0	0	0	0	0	0	0	0	0	0	0	0	0	0	0	0	1	0	1	0	0	0	0	0	0
K23-8	2012-06-06	KU5	4	5	Green	Apterous	0	0	0	0	0	0	0		0	0	0	0	0	0	0	0	0	0	0	0	0	0	0	0	0	0	0	0	0	0	1	0	0	0	0	0	0	0
K23-9	2012-06-06	KU5	4	5	Green	Apterous	0	0	0	0	0	0	0		0	0	0	0	0	0	0	0	0	0	0	0	0	0	0	0	0	0	0	0	0	0	1	0	0	0	0	0	0	0
K23-15	2012-06-06	KU5	4	3	Green	Apterous	0	0	0	0	0	0	0		0	0	0	0	0	0	0	0	0	0	0	0	0	0	0	0	0	0	0	0	0	0	1	0	0	0	0	0	0	0
K23-23	2012-06-06	KU5	4	3	Green	Apterous	1	0	0	1	0	0	0		0	0	1	0	0	0	0	0	0	0	0	0	0	0	0	0	0	0	0	0	0	2	0	0	0	0	0	0	0	0
K24-1	2012-06-06	KU6	4	5	Green	Alate	0	0	0	0	0	0	0		0	0	0	0	0	0	0	0	0	0	0	0	0	0	0	0	0	0	0	0	0	0	1	0	0	0	0	0	0	0
K24-10	2012-06-06	KU6	4	3	Green	Apterous	0	1	0	0	0	0	0		0	0	0	0	0	0	0	0	0	0	0	0	0	0	0	0	0	0	0	0	0	1	0	0	1	0	0	0	0	0
K24-11	2012-06-06	KU6	4	2	Green	Apterous	0	1	0	0	0	0	0		0	0	0	0	0	0	0	0	0	0	0	0	0	0	0	0	0	0	0	0	0	1	0	0	1	0	0	0	0	0
K24-12	2012-06-06	KU6	4	2	Green	Apterous	0	1	0	0	0	0	0		0	0	0	0	0	0	0	0	0	0	0	0	0	0	0	0	0	0	0	0	0	1	0	0	1	0	0	0	0	0
K24-13	2012-06-06	KU6	4	5	Green	Apterous	0	0	0	0	0	0	0		0	0	0	0	0	0	0	0	0	0	0	0	0	0	0	0	0	0	0	0	0	0	1	0	0	0	0	0	0	0
K24-14	2012-06-06	KU6	4	5	Green	Apterous	0	0	0	0	0	0	0		0	0	0	0	0	0	0	0	0	0	0	0	0	0	0	0	0	0	0	0	0	0	1	0	0	0	0	0	0	0
K24-15	2012-06-06	KU6	4	5	Green	Apterous	0	0	0	0	0	0	0		0	0	0	0	0	0	0	0	0	0	0	0	0	0	0	0	0	0	0	0	0	0	1	0	0	0	0	0	0	0
K24-16	2012-06-06	KU6	4	5	Green	Apterous	1	0	0	0	0	0	0		0	0	0	0	0	0	0	0	0	0	0	0	0	0	0	0	0	0	0	0	0	1	0	1	0	0	0	0	0	0
K24-17	2012-06-06	KU6	4	4	Green	Apterous	0	0	0	0	0	0	0		0	0	0	0	0	0	0	0	0	0	0	0	0	0	0	0	0	0	0	0	0	0	1	0	0	0	0	0	0	0
K24-19	2012-06-06	KU6	4	4	Green	Apterous	0	0	0	0	0	0	0		0	0	0	0	0	0	0	0	0	0	0	0	0	0	0	0	0	0	0	0	0	0	1	0	0	0	0	0	0	0
K24-2	2012-06-06	KU6	4	5	Green	Apterous	0	0	0	0	0	0	0		0	0	0	0	0	0	0	0	0	0	0	0	0	0	0	0	0	0	0	0	0	0	1	0	0	0	0	0	0	0
K24-20	2012-06-06	KU6	4	4	Green	Apterous	0	0	0	0	0	0	0		0	0	0	0	0	0	0	0	0	0	0	0	0	0	0	0	0	0	0	0	0	0	1	0	0	0	0	0	0	0
K24-24	2012-06-06	KU6	4	2	Green	Apterous	0	0	0	0	0	0	0		0	0	0	0	0	0	0	0	0	0	0	0	0	0	0	0	0	0	0	0	0	0	1	0	0	0	0	0	0	0
K24-3	2012-06-06	KU6	4	5	Green	Apterous	1	0	0	0	0	0	0		0	0	0	0	0	0	0	0	0	0	0	0	0	0	0	0	0	0	0	0	0	1	0	1	0	0	0	0	0	0
K24-4	2012-06-06	KU6	4	5	Green	Apterous	0	0	0	0	0	0	0		0	0	0	0	0	0	0	0	0	0	0	0	0	0	0	0	0	0	0	0	0	0	1	0	0	0	0	0	0	0
K24-5	2012-06-06	KU6	4	5	Green	Apterous	0	1	0	0	1	0	0		0	0	0	0	0	0	0	0	1	0	0	0	0	0	0	0	0	0	0	0	0	2	0	0	0	0	0	0	0	0
K24-6	2012-06-06	KU6	4	5	Green	Apterous	0	1	0	0	0	0	0		0	0	0	0	0	0	0	0	0	0	0	0	0	0	0	0	0	0	0	0	0	1	0	0	1	0	0	0	0	0
K24-7	2012-06-06	KU6	4	5	Green	Apterous	0	1	0	0	0	0	0		0	0	0	0	0	0	0	0	0	0	0	0	0	0	0	0	0	0	0	0	0	1	0	0	1	0	0	0	0	0
K24-8	2012-06-06	KU6	4	3	Green	Apterous	0	0	0	0	0	0	0		0	0	0	0	0	0	0	0	0	0	0	0	0	0	0	0	0	0	0	0	0	0	1	0	0	0	0	0	0	0
K24-9	2012-06-06	KU6	4	2	Green	Apterous	0	0	0	0	0	0	0		0	0	0	0	0	0	0	0	0	0	0	0	0	0	0	0	0	0	0	0	0	0	1	0	0	0	0	0	0	0
K24-18	2012-06-06	KU6	4	4	Green	Apterous	0	0	0	0	0	0	0		0	0	0	0	0	0	0	0	0	0	0	0	0	0	0	0	0	0	0	0	0	0	1	0	0	0	0	0	0	0
K24-22	2012-06-06	KU6	4	4	Green	Apterous	0	0	0	0	0	0	0		0	0	0	0	0	0	0	0	0	0	0	0	0	0	0	0	0	0	0	0	0	0	1	0	0	0	0	0	0	0
K24-23	2012-06-06	KU6	4	2	Green	Apterous	0	0	0	0	0	0	0		0	0	0	0	0	0	0	0	0	0	0	0	0	0	0	0	0	0	0	0	0	0	1	0	0	0	0	0	0	0
K25-10	2012-06-19	KU1	5	4	Red	Apterous	1	0	0	1	1	1	0		0	0	1	1	1	0	0	0	0	0	0	0	0	0	0	1	1	0	1	0	0	4	0	0	0	0	0	0	0	0
K25-3	2012-06-19	KU1	5	5	Red	Apterous	0	0	0	0	1	1	0		0	0	0	0	0	0	0	0	0	0	0	0	0	0	0	0	0	0	1	0	0	2	0	0	0	0	0	0	0	0
K25-14	2012-06-19	KU1	5	5	Green	Apterous	1	0	0	1	0	1	0		0	0	1	0	1	0	0	0	0	0	0	0	0	0	0	0	1	0	0	0	0	3	0	0	0	0	0	0	0	0
K25-19	2012-06-19	KU1	5	5	Green	Apterous	1	1	0	0	0	1	0		1	0	0	0	1	0	0	0	0	1	0	0	0	0	0	0	0	0	0	0	0	3	0	0	0	0	0	0	0	0
K25-1	2012-06-19	KU1	5	5	Red	Apterous	1	0	0	0	1	1	0		0	0	0	1	1	0	0	0	0	0	0	0	0	0	0	0	0	0	1	0	0	3	0	0	0	0	0	0	0	0
K25-11	2012-06-19	KU1	5	4	Red	Apterous	0	0	0	0	0	0	0		0	0	0	0	0	0	0	0	0	0	0	0	0	0	0	0	0	0	0	0	0	0	1	0	0	0	0	0	0	0
K25-12	2012-06-19	KU1	5	4	Red	Apterous	0	0	0	0	0	1	0		0	0	0	0	0	0	0	0	0	0	0	0	0	0	0	0	0	0	0	0	0	1	0	0	0	0	0	0	1	0
K25-13	2012-06-19	KU1	5	5	Green	Alate	1	0	0	0	0	1	0		0	0	0	0	1	0	0	0	0	0	0	0	0	0	0	0	0	0	0	0	0	2	0	0	0	0	0	0	0	0
K25-16	2012-06-19	KU1	5	5	Green	Apterous	0	0	0	0	0	1	0		0	0	0	0	0	0	0	0	0	0	0	0	0	0	0	0	0	0	0	0	0	1	0	0	0	0	0	0	1	0
K25-17	2012-06-19	KU1	5	5	Green	Apterous	0	0	0	0	0	0	0		0	0	0	0	0	0	0	0	0	0	0	0	0	0	0	0	0	0	0	0	0	0	1	0	0	0	0	0	0	0
K25-18	2012-06-19	KU1	5	5	Green	Apterous	1	0	0	0	0	0	0		0	0	0	0	0	0	0	0	0	0	0	0	0	0	0	0	0	0	0	0	0	1	0	1	0	0	0	0	0	0
K25-2	2012-06-19	KU1	5	5	Red	Apterous	0	1	0	0	0	0	0		0	0	0	0	0	0	0	0	0	0	0	0	0	0	0	0	0	0	0	0	0	1	0	0	1	0	0	0	0	0
K25-20	2012-06-19	KU1	5	3	Green	Apterous	0	0	0	0	0	1	0		0	0	0	0	0	0	0	0	0	0	0	0	0	0	0	0	0	0	0	0	0	1	0	0	0	0	0	0	1	0
K25-21	2012-06-19	KU1	5	3	Green	Apterous	0	0	0	0	0	1	0		0	0	0	0	0	0	0	0	0	0	0	0	0	0	0	0	0	0	0	0	0	1	0	0	0	0	0	0	1	0
K25-22	2012-06-19	KU1	5	3	Green	Apterous	0	0	0	0	0	0	0		0	0	0	0	0	0	0	0	0	0	0	0	0	0	0	0	0	0	0	0	0	0	1	0	0	0	0	0	0	0
K25-23	2012-06-19	KU1	5	3	Green	Apterous	0	0	0	0	0	1	0		0	0	0	0	0	0	0	0	0	0	0	0	0	0	0	0	0	0	0	0	0	1	0	0	0	0	0	0	1	0
K25-24	2012-06-19	KU1	5	3	Green	Apterous	0	0	0	0	0	1	0		0	0	0	0	0	0	0	0	0	0	0	0	0	0	0	0	0	0	0	0	0	1	0	0	0	0	0	0	1	0
K25-4	2012-06-19	KU1	5	5	Red	Apterous	0	0	0	0	1	1	0		0	0	0	0	0	0	0	0	0	0	0	0	0	0	0	0	0	0	1	0	0	2	0	0	0	0	0	0	0	0
K25-6	2012-06-19	KU1	5	5	Red	Alate	0	0	0	0	0	0	0		0	0	0	0	0	0	0	0	0	0	0	0	0	0	0	0	0	0	0	0	0	0	1	0	0	0	0	0	0	0
K25-7	2012-06-19	KU1	5	5	Red	Apterous	0	0	0	0	0	0	0		0	0	0	0	0	0	0	0	0	0	0	0	0	0	0	0	0	0	0	0	0	0	1	0	0	0	0	0	0	0
K25-9	2012-06-19	KU1	5	4	Red	Apterous	0	0	0	0	0	0	0		0	0	0	0	0	0	0	0	0	0	0	0	0	0	0	0	0	0	0	0	0	0	1	0	0	0	0	0	0	0
K25-15	2012-06-19	KU1	5	5	Green	Alate	0	0	0	0	0	0	0		0	0	0	0	0	0	0	0	0	0	0	0	0	0	0	0	0	0	0	0	0	0	1	0	0	0	0	0	0	0
K25-5	2012-06-19	KU1	5	5	Red	Apterous	0	0	0	1	0	0	0		0	0	0	0	0	0	0	0	0	0	0	0	0	0	0	0	0	0	0	0	0	1	0	0	0	0	1	0	0	0
K25-8	2012-06-19	KU1	5	4	Red	Apterous	0	0	0	0	0	0	0		0	0	0	0	0	0	0	0	0	0	0	0	0	0	0	0	0	0	0	0	0	0	1	0	0	0	0	0	0	0
K26-15	2012-06-19	KU2	5	5	Red	Apterous	1	0	0	0	1	0	0		0	0	0	1	0	0	0	0	0	0	0	0	0	0	0	0	0	0	0	0	0	2	0	0	0	0	0	0	0	0
K26-13	2012-06-19	KU2	5	5	Red	Alate	0	0	0	0	0	1	0		0	0	0	0	0	0	0	0	0	0	0	0	0	0	0	0	0	0	0	0	0	1	0	0	0	0	0	0	1	0
K26-1	2012-06-19	KU2	5	5	Green	Apterous	0	1	0	0	0	1	0		0	0	0	0	0	0	0	0	0	1	0	0	0	0	0	0	0	0	0	0	0	2	0	0	0	0	0	0	0	0
K26-10	2012-06-19	KU2	5	5	Green	Apterous	0	1	0	0	0	1	0		0	0	0	0	0	0	0	0	0	1	0	0	0	0	0	0	0	0	0	0	0	2	0	0	0	0	0	0	0	0
K26-14	2012-06-19	KU2	5	5	Red	Apterous	1	0	0	1	1	0	0		0	0	1	1	0	0	0	0	0	0	0	0	0	0	0	1	0	0	0	0	0	3	0	0	0	0	0	0	0	0
K26-17	2012-06-19	KU2	5	5	Red	Apterous	1	0	0	0	0	1	0		0	0	0	0	1	0	0	0	0	0	0	0	0	0	0	0	0	0	0	0	0	2	0	0	0	0	0	0	0	0
K26-18	2012-06-19	KU2	5	5	Red	Alate	0	0	0	0	0	1	0		0	0	0	0	0	0	0	0	0	0	0	0	0	0	0	0	0	0	0	0	0	1	0	0	0	0	0	0	1	0
K26-19	2012-06-19	KU2	5	5	Red	Apterous	1	0	0	0	1	1	0		0	0	0	1	1	0	0	0	0	0	0	0	0	0	0	0	0	0	1	0	0	3	0	0	0	0	0	0	0	0
K26-2	2012-06-19	KU2	5	5	Green	Apterous	0	0	0	1	0	0	0		0	0	0	0	0	0	0	0	0	0	0	0	0	0	0	0	0	0	0	0	0	1	0	0	0	0	1	0	0	0
K26-20	2012-06-19	KU2	5	5	Red	Apterous	0	0	0	0	1	0	0		0	0	0	0	0	0	0	0	0	0	0	0	0	0	0	0	0	0	0	0	0	1	0	0	0	0	0	1	0	0
K26-21	2012-06-19	KU2	5	5	Red	Apterous	1	0	0	0	1	0	0		0	0	0	1	0	0	0	0	0	0	0	0	0	0	0	0	0	0	0	0	0	2	0	0	0	0	0	0	0	0
K26-22	2012-06-19	KU2	5	5	Red	Apterous	1	1	0	0	0	1	0		1	0	0	0	1	0	0	0	0	1	0	0	0	0	0	0	0	0	0	0	0	3	0	0	0	0	0	0	0	0
K26-23	2012-06-19	KU2	5	5	Red	Apterous	1	0	0	1	1	0	0		0	0	1	1	0	0	0	0	0	0	0	0	0	0	0	1	0	0	0	0	0	3	0	0	0	0	0	0	0	0
K26-24	2012-06-19	KU2	5	4	Red	Apterous	1	0	0	1	0	1	0		0	0	1	0	1	0	0	0	0	0	0	0	0	0	0	0	1	0	0	0	0	3	0	0	0	0	0	0	0	0
K26-3	2012-06-19	KU2	5	5	Green	Apterous	0	1	0	0	0	1	0		0	0	0	0	0	0	0	0	0	1	0	0	0	0	0	0	0	0	0	0	0	2	0	0	0	0	0	0	0	0
K26-5	2012-06-19	KU2	5	5	Green	Apterous	0	0	0	0	0	0	0		0	0	0	0	0	0	0	0	0	0	0	0	0	0	0	0	0	0	0	0	0	0	1	0	0	0	0	0	0	0
K26-6	2012-06-19	KU2	5	5	Green	Apterous	0	1	0	0	0	0	0		0	0	0	0	0	0	0	0	0	0	0	0	0	0	0	0	0	0	0	0	0	1	0	0	1	0	0	0	0	0
K26-7	2012-06-19	KU2	5	5	Green	Apterous	0	1	1	0	0	1	0		0	0	0	0	0	0	1	0	0	1	0	0	0	1	0	0	0	0	0	0	0	3	0	0	0	0	0	0	0	0
K26-8	2012-06-19	KU2	5	5	Green	Apterous	0	0	0	0	0	0	0		0	0	0	0	0	0	0	0	0	0	0	0	0	0	0	0	0	0	0	0	0	0	1	0	0	0	0	0	0	0
K26-11	2012-06-19	KU2	5	5	Green	Apterous	1	0	0	0	0	0	0		0	0	0	0	0	0	0	0	0	0	0	0	0	0	0	0	0	0	0	0	0	1	0	1	0	0	0	0	0	0
K26-12	2012-06-19	KU2	5	5	Green	Apterous	0	0	0	0	0	0	0		0	0	0	0	0	0	0	0	0	0	0	0	0	0	0	0	0	0	0	0	0	0	1	0	0	0	0	0	0	0
K26-16	2012-06-19	KU2	5	5	Red	Apterous	0	0	0	1	0	0	0		0	0	0	0	0	0	0	0	0	0	0	0	0	0	0	0	0	0	0	0	0	1	0	0	0	0	1	0	0	0
K26-4	2012-06-19	KU2	5	5	Green	Apterous	0	0	0	0	0	0	0		0	0	0	0	0	0	0	0	0	0	0	0	0	0	0	0	0	0	0	0	0	0	1	0	0	0	0	0	0	0
K26-9	2012-06-19	KU2	5	5	Green	Apterous	0	1	0	0	0	0	0		0	0	0	0	0	0	0	0	0	0	0	0	0	0	0	0	0	0	0	0	0	1	0	0	1	0	0	0	0	0
K27-12	2012-06-19	KU3	5	5	Green	Apterous	0	0	0	0	0	1	0		0	0	0	0	0	0	0	0	0	0	0	0	0	0	0	0	0	0	0	0	0	1	0	0	0	0	0	0	1	0
K27-18	2012-06-19	KU3	5	5	Red	Apterous	0	0	0	0	0	1	0		0	0	0	0	0	0	0	0	0	0	0	0	0	0	0	0	0	0	0	0	0	1	0	0	0	0	0	0	1	0
K27-4	2012-06-19	KU3	5	5	Green	Apterous	1	1	0	0	0	1	0		1	0	0	0	1	0	0	0	0	1	0	0	0	0	0	0	0	0	0	0	0	3	0	0	0	0	0	0	0	0
K27-1	2012-06-19	KU3	5	5	Green	Apterous	0	0	0	0	0	1	0		0	0	0	0	0	0	0	0	0	0	0	0	0	0	0	0	0	0	0	0	0	1	0	0	0	0	0	0	1	0
K27-10	2012-06-19	KU3	5	5	Green	Apterous	1	0	0	0	0	0	0		0	0	0	0	0	0	0	0	0	0	0	0	0	0	0	0	0	0	0	0	0	1	0	1	0	0	0	0	0	0
K27-11	2012-06-19	KU3	5	5	Green	Alate	1	0	0	0	0	1	0		0	0	0	0	1	0	0	0	0	0	0	0	0	0	0	0	0	0	0	0	0	2	0	0	0	0	0	0	0	0
K27-13	2012-06-19	KU3	5	5	Red	Apterous	1	0	0	1	0	0	0		0	0	1	0	0	0	0	0	0	0	0	0	0	0	0	0	0	0	0	0	0	2	0	0	0	0	0	0	0	0
K27-14	2012-06-19	KU3	5	5	Red	Apterous	1	0	0	0	0	0	0		0	0	0	0	0	0	0	0	0	0	0	0	0	0	0	0	0	0	0	0	0	1	0	1	0	0	0	0	0	0
K27-16	2012-06-19	KU3	5	5	Red	Apterous	0	0	0	1	0	0	0		0	0	0	0	0	0	0	0	0	0	0	0	0	0	0	0	0	0	0	0	0	1	0	0	0	0	1	0	0	0
K27-17	2012-06-19	KU3	5	5	Red	Apterous	0	0	0	0	0	1	0		0	0	0	0	0	0	0	0	0	0	0	0	0	0	0	0	0	0	0	0	0	1	0	0	0	0	0	0	1	0
K27-19	2012-06-19	KU3	5	5	Red	Apterous	0	0	0	0	0	0	0		0	0	0	0	0	0	0	0	0	0	0	0	0	0	0	0	0	0	0	0	0	0	1	0	0	0	0	0	0	0
K27-20	2012-06-19	KU3	5	4	Red	Apterous	0	0	0	0	0	1	0		0	0	0	0	0	0	0	0	0	0	0	0	0	0	0	0	0	0	0	0	0	1	0	0	0	0	0	0	1	0
K27-21	2012-06-19	KU3	5	4	Red	Apterous	0	0	0	0	0	0	0		0	0	0	0	0	0	0	0	0	0	0	0	0	0	0	0	0	0	0	0	0	0	1	0	0	0	0	0	0	0
K27-22	2012-06-19	KU3	5	5	Red	Apterous	1	0	0	0	0	0	0		0	0	0	0	0	0	0	0	0	0	0	0	0	0	0	0	0	0	0	0	0	1	0	1	0	0	0	0	0	0
K27-23	2012-06-19	KU3	5	5	Red	Apterous	1	0	0	0	0	0	0		0	0	0	0	0	0	0	0	0	0	0	0	0	0	0	0	0	0	0	0	0	1	0	1	0	0	0	0	0	0
K27-3	2012-06-19	KU3	5	5	Green	Apterous	0	0	0	0	0	0	0		0	0	0	0	0	0	0	0	0	0	0	0	0	0	0	0	0	0	0	0	0	0	1	0	0	0	0	0	0	0
K27-5	2012-06-19	KU3	5	5	Green	Apterous	1	0	0	0	0	0	0		0	0	0	0	0	0	0	0	0	0	0	0	0	0	0	0	0	0	0	0	0	1	0	1	0	0	0	0	0	0
K27-6	2012-06-19	KU3	5	5	Green	Apterous	1	1	0	0	0	1	0		1	0	0	0	1	0	0	0	0	1	0	0	0	0	0	0	0	0	0	0	0	3	0	0	0	0	0	0	0	0
K27-7	2012-06-19	KU3	5	5	Green	Apterous	0	0	0	0	0	0	0		0	0	0	0	0	0	0	0	0	0	0	0	0	0	0	0	0	0	0	0	0	0	1	0	0	0	0	0	0	0
K27-8	2012-06-19	KU3	5	5	Green	Apterous	1	0	0	0	0	0	0		0	0	0	0	0	0	0	0	0	0	0	0	0	0	0	0	0	0	0	0	0	1	0	1	0	0	0	0	0	0
K27-9	2012-06-19	KU3	5	5	Green	Apterous	0	0	0	0	0	0	0		0	0	0	0	0	0	0	0	0	0	0	0	0	0	0	0	0	0	0	0	0	0	1	0	0	0	0	0	0	0
K27-15	2012-06-19	KU3	5	5	Red	Apterous	1	0	0	0	0	0	0		0	0	0	0	0	0	0	0	0	0	0	0	0	0	0	0	0	0	0	0	0	1	0	1	0	0	0	0	0	0
K27-2	2012-06-19	KU3	5	5	Green	Apterous	0	0	0	0	0	0	0		0	0	0	0	0	0	0	0	0	0	0	0	0	0	0	0	0	0	0	0	0	0	1	0	0	0	0	0	0	0
K27-24	2012-06-19	KU3	5	5	Red	Apterous	1	0	0	0	0	0	0		0	0	0	0	0	0	0	0	0	0	0	0	0	0	0	0	0	0	0	0	0	1	0	1	0	0	0	0	0	0
K28-5	2012-06-19	KU4	5	5	Green	Apterous	0	0	0	0	0	1	0		0	0	0	0	0	0	0	0	0	0	0	0	0	0	0	0	0	0	0	0	0	1	0	0	0	0	0	0	1	0
K28-1	2012-06-19	KU4	5	5	Green	Apterous	1	0	1	0	0	1	0		0	1	0	0	1	0	0	0	0	0	0	0	0	1	0	0	0	0	0	0	0	3	0	0	0	0	0	0	0	0
K28-10	2012-06-19	KU4	5	5	Green	Apterous	1	1	0	0	0	0	0		1	0	0	0	0	0	0	0	0	0	0	0	0	0	0	0	0	0	0	0	0	2	0	0	0	0	0	0	0	0
K28-11	2012-06-19	KU4	5	5	Green	Apterous	1	0	1	0	0	1	0		0	1	0	0	1	0	0	0	0	0	0	0	0	1	0	0	0	0	0	0	0	3	0	0	0	0	0	0	0	0
K28-12	2012-06-19	KU4	5	5	Green	Apterous	1	0	1	0	0	1	0		0	1	0	0	1	0	0	0	0	0	0	0	0	1	0	0	0	0	0	0	0	3	0	0	0	0	0	0	0	0
K28-13	2012-06-19	KU4	5	5	Red	Alate	1	0	0	1	0	0	0		0	0	1	0	0	0	0	0	0	0	0	0	0	0	0	0	0	0	0	0	0	2	0	0	0	0	0	0	0	0
K28-14	2012-06-19	KU4	5	5	Red	Apterous	1	0	0	0	0	1	0		0	0	0	0	1	0	0	0	0	0	0	0	0	0	0	0	0	0	0	0	0	2	0	0	0	0	0	0	0	0
K28-15	2012-06-19	KU4	5	5	Red	Apterous	1	0	0	0	0	1	0		0	0	0	0	1	0	0	0	0	0	0	0	0	0	0	0	0	0	0	0	0	2	0	0	0	0	0	0	0	0
K28-16	2012-06-19	KU4	5	5	Red	Apterous	0	0	0	0	0	0	0		0	0	0	0	0	0	0	0	0	0	0	0	0	0	0	0	0	0	0	0	0	0	1	0	0	0	0	0	0	0
K28-17	2012-06-19	KU4	5	5	Red	Apterous	1	0	0	0	0	1	0		0	0	0	0	1	0	0	0	0	0	0	0	0	0	0	0	0	0	0	0	0	2	0	0	0	0	0	0	0	0
K28-18	2012-06-19	KU4	5	5	Red	Apterous	1	0	0	1	0	0	0		0	0	1	0	0	0	0	0	0	0	0	0	0	0	0	0	0	0	0	0	0	2	0	0	0	0	0	0	0	0
K28-19	2012-06-19	KU4	5	5	Red	Apterous	1	0	0	1	0	1	0		0	0	1	0	1	0	0	0	0	0	0	0	0	0	0	0	1	0	0	0	0	3	0	0	0	0	0	0	0	0
K28-2	2012-06-19	KU4	5	5	Green	Apterous	1	0	0	0	0	1	0		0	0	0	0	1	0	0	0	0	0	0	0	0	0	0	0	0	0	0	0	0	2	0	0	0	0	0	0	0	0
K28-20	2012-06-19	KU4	5	5	Red	Apterous	1	1	0	0	0	0	0		1	0	0	0	0	0	0	0	0	0	0	0	0	0	0	0	0	0	0	0	0	2	0	0	0	0	0	0	0	0
K28-21	2012-06-19	KU4	5	5	Red	Apterous	1	0	0	0	0	0	0		0	0	0	0	0	0	0	0	0	0	0	0	0	0	0	0	0	0	0	0	0	1	0	1	0	0	0	0	0	0
K28-22	2012-06-19	KU4	5	5	Red	Apterous	1	0	0	0	0	1	0		0	0	0	0	1	0	0	0	0	0	0	0	0	0	0	0	0	0	0	0	0	2	0	0	0	0	0	0	0	0
K28-23	2012-06-19	KU4	5	4	Red	Apterous	1	0	0	0	0	0	0		0	0	0	0	0	0	0	0	0	0	0	0	0	0	0	0	0	0	0	0	0	1	0	1	0	0	0	0	0	0
K28-24	2012-06-19	KU4	5	5	Red	Alate	1	0	0	0	0	0	0		0	0	0	0	0	0	0	0	0	0	0	0	0	0	0	0	0	0	0	0	0	1	0	1	0	0	0	0	0	0
K28-3	2012-06-19	KU4	5	5	Green	Apterous	1	0	0	0	0	0	0		0	0	0	0	0	0	0	0	0	0	0	0	0	0	0	0	0	0	0	0	0	1	0	1	0	0	0	0	0	0
K28-4	2012-06-19	KU4	5	5	Green	Apterous	0	1	0	0	0	0	0		0	0	0	0	0	0	0	0	0	0	0	0	0	0	0	0	0	0	0	0	0	1	0	0	1	0	0	0	0	0
K28-6	2012-06-19	KU4	5	5	Green	Apterous	1	0	0	0	0	1	0		0	0	0	0	1	0	0	0	0	0	0	0	0	0	0	0	0	0	0	0	0	2	0	0	0	0	0	0	0	0
K28-7	2012-06-19	KU4	5	5	Green	Apterous	0	0	1	0	0	1	0		0	0	0	0	0	0	0	0	0	0	0	0	0	1	0	0	0	0	0	0	0	2	0	0	0	0	0	0	0	0
K28-8	2012-06-19	KU4	5	5	Green	Apterous	0	0	0	0	0	0	0		0	0	0	0	0	0	0	0	0	0	0	0	0	0	0	0	0	0	0	0	0	0	1	0	0	0	0	0	0	0
K28-9	2012-06-19	KU4	5	5	Green	Apterous	0	0	0	0	0	0	0		0	0	0	0	0	0	0	0	0	0	0	0	0	0	0	0	0	0	0	0	0	0	1	0	0	0	0	0	0	0
K30-11	2012-06-19	KU6	5	5	Green	Apterous	1	0	0	0	0	1	0		0	0	0	0	1	0	0	0	0	0	0	0	0	0	0	0	0	0	0	0	0	2	0	0	0	0	0	0	0	0
K30-15	2012-06-19	KU6	5	5	Red	Apterous	0	0	0	0	0	1	0		0	0	0	0	0	0	0	0	0	0	0	0	0	0	0	0	0	0	0	0	0	1	0	0	0	0	0	0	1	0
K30-16	2012-06-19	KU6	5	5	Red	Apterous	1	0	0	0	0	1	0		0	0	0	0	1	0	0	0	0	0	0	0	0	0	0	0	0	0	0	0	0	2	0	0	0	0	0	0	0	0
K30-2	2012-06-19	KU6	5	5	Green	Apterous	1	1	0	0	0	1	0		1	0	0	0	1	0	0	0	0	1	0	0	0	0	0	0	0	0	0	0	0	3	0	0	0	0	0	0	0	0
K30-5	2012-06-19	KU6	5	5	Green	Apterous	0	1	0	0	0	1	0		0	0	0	0	0	0	0	0	0	1	0	0	0	0	0	0	0	0	0	0	0	2	0	0	0	0	0	0	0	0
K30-8	2012-06-19	KU6	5	5	Green	Apterous	0	0	0	0	0	1	1		0	0	0	0	0	0	0	0	0	0	0	0	0	0	0	0	0	0	0	0	1	2	0	0	0	0	0	0	0	0
K30-9	2012-06-19	KU6	5	5	Green	Apterous	0	0	0	0	0	1	1		0	0	0	0	0	0	0	0	0	0	0	0	0	0	0	0	0	0	0	0	1	2	0	0	0	0	0	0	0	0
K30-1	2012-06-19	KU6	5	5	Green	Alate	0	0	0	0	0	0	1		0	0	0	0	0	0	0	0	0	0	0	0	0	0	0	0	0	0	0	0	0	1	0	0	0	0	0	0	0	1
K30-10	2012-06-19	KU6	5	5	Green	Apterous	0	1	0	0	0	0	0		0	0	0	0	0	0	0	0	0	0	0	0	0	0	0	0	0	0	0	0	0	1	0	0	1	0	0	0	0	0
K30-12	2012-06-19	KU6	5	4	Green	Apterous	0	0	1	0	0	1	0		0	0	0	0	0	0	0	0	0	0	0	0	0	1	0	0	0	0	0	0	0	2	0	0	0	0	0	0	0	0
K30-13	2012-06-19	KU6	5	5	Red	Alate	0	0	0	0	0	0	0		0	0	0	0	0	0	0	0	0	0	0	0	0	0	0	0	0	0	0	0	0	0	1	0	0	0	0	0	0	0
K30-14	2012-06-19	KU6	5	5	Red	Apterous	0	0	0	0	0	0	0		0	0	0	0	0	0	0	0	0	0	0	0	0	0	0	0	0	0	0	0	0	0	1	0	0	0	0	0	0	0
K30-17	2012-06-19	KU6	5	5	Red	Apterous	0	0	0	0	0	0	0		0	0	0	0	0	0	0	0	0	0	0	0	0	0	0	0	0	0	0	0	0	0	1	0	0	0	0	0	0	0
K30-18	2012-06-19	KU6	5	5	Red	Apterous	1	0	0	1	1	0	0		0	0	1	1	0	0	0	0	0	0	0	0	0	0	0	1	0	0	0	0	0	3	0	0	0	0	0	0	0	0
K30-19	2012-06-19	KU6	5	5	Red	Apterous	0	0	0	0	0	0	0		0	0	0	0	0	0	0	0	0	0	0	0	0	0	0	0	0	0	0	0	0	0	1	0	0	0	0	0	0	0
K30-20	2012-06-19	KU6	5	5	Red	Apterous	0	0	0	0	0	0	0		0	0	0	0	0	0	0	0	0	0	0	0	0	0	0	0	0	0	0	0	0	0	1	0	0	0	0	0	0	0
K30-22	2012-06-19	KU6	5	5	Red	Apterous	0	0	0	0	0	1	1		0	0	0	0	0	0	0	0	0	0	0	0	0	0	0	0	0	0	0	0	1	2	0	0	0	0	0	0	0	0
K30-24	2012-06-19	KU6	5	3	Red	Apterous	0	0	0	1	0	0	0		0	0	0	0	0	0	0	0	0	0	0	0	0	0	0	0	0	0	0	0	0	1	0	0	0	0	1	0	0	0
K30-3	2012-06-19	KU6	5	5	Green	Apterous	0	0	0	0	0	0	0		0	0	0	0	0	0	0	0	0	0	0	0	0	0	0	0	0	0	0	0	0	0	1	0	0	0	0	0	0	0
K30-4	2012-06-19	KU6	5	5	Green	Apterous	0	0	0	0	0	0	0		0	0	0	0	0	0	0	0	0	0	0	0	0	0	0	0	0	0	0	0	0	0	1	0	0	0	0	0	0	0
K30-6	2012-06-19	KU6	5	5	Green	Apterous	0	1	0	0	0	0	0		0	0	0	0	0	0	0	0	0	0	0	0	0	0	0	0	0	0	0	0	0	1	0	0	1	0	0	0	0	0
K30-7	2012-06-19	KU6	5	5	Green	Apterous	1	0	0	1	0	0	0		0	0	1	0	0	0	0	0	0	0	0	0	0	0	0	0	0	0	0	0	0	2	0	0	0	0	0	0	0	0
K30-21	2012-06-19	KU6	5	5	Red	Apterous	1	0	0	0	0	0	0		0	0	0	0	0	0	0	0	0	0	0	0	0	0	0	0	0	0	0	0	0	1	0	1	0	0	0	0	0	0
K31-10	2012-07-02	KU1	6	4	Green	Apterous	1	0	0	1	0	1	0	13 bp	0	0	1	0	1	0	0	0	0	0	0	0	0	0	0	0	1	0	0	0	0	3	0	0	0	0	0	0	0	0
K31-11	2012-07-02	KU1	6	3	Green	Apterous	0	0	0	0	0	1	0		0	0	0	0	0	0	0	0	0	0	0	0	0	0	0	0	0	0	0	0	0	1	0	0	0	0	0	0	1	0
K31-17	2012-07-02	KU1	6	2	Red	Apterous	0	0	0	0	0	1	0		0	0	0	0	0	0	0	0	0	0	0	0	0	0	0	0	0	0	0	0	0	1	0	0	0	0	0	0	1	0
K31-23	2012-07-02	KU1	6	5	Red	Alate	1	0	0	0	0	1	0	13 bp	0	0	0	0	1	0	0	0	0	0	0	0	0	0	0	0	0	0	0	0	0	2	0	0	0	0	0	0	0	0
K31-4	2012-07-02	KU1	6	3	Green	Apterous	1	0	0	1	1	1	0	13 bp	0	0	1	1	1	0	0	0	0	0	0	0	0	0	0	1	1	0	1	0	0	4	0	0	0	0	0	0	0	0
K31-9	2012-07-02	KU1	6	3	Green	Apterous	0	0	0	0	0	1	0		0	0	0	0	0	0	0	0	0	0	0	0	0	0	0	0	0	0	0	0	0	1	0	0	0	0	0	0	1	0
K31-1	2012-07-02	KU1	6	4	Green	Apterous	0	0	0	0	0	1	0		0	0	0	0	0	0	0	0	0	0	0	0	0	0	0	0	0	0	0	0	0	1	0	0	0	0	0	0	1	0
K31-12	2012-07-02	KU1	6	2	Green	Apterous	0	0	0	0	0	0	0	13 bp	0	0	0	0	0	0	0	0	0	0	0	0	0	0	0	0	0	0	0	0	0	0	1	0	0	0	0	0	0	0
K31-13	2012-07-02	KU1	6	2	Green	Apterous	0	0	0	0	0	1	0	13 bp	0	0	0	0	0	0	0	0	0	0	0	0	0	0	0	0	0	0	0	0	0	1	0	0	0	0	0	0	1	0
K31-14	2012-07-02	KU1	6	2	Green	Apterous	1	0	0	0	0	0	0	13 bp	0	0	0	0	0	0	0	0	0	0	0	0	0	0	0	0	0	0	0	0	0	1	0	1	0	0	0	0	0	0
K31-15	2012-07-02	KU1	6	2	Red	Apterous	1	0	0	0	0	0	0		0	0	0	0	0	0	0	0	0	0	0	0	0	0	0	0	0	0	0	0	0	1	0	1	0	0	0	0	0	0
K31-16	2012-07-02	KU1	6	2	Red	Apterous	1	0	0	0	0	0	0		0	0	0	0	0	0	0	0	0	0	0	0	0	0	0	0	0	0	0	0	0	1	0	1	0	0	0	0	0	0
K31-18	2012-07-02	KU1	6	2	Red	Apterous	0	0	0	0	0	0	0		0	0	0	0	0	0	0	0	0	0	0	0	0	0	0	0	0	0	0	0	0	0	1	0	0	0	0	0	0	0
K31-19	2012-07-02	KU1	6	3	Red	Apterous	1	0	0	0	0	0	0		0	0	0	0	0	0	0	0	0	0	0	0	0	0	0	0	0	0	0	0	0	1	0	1	0	0	0	0	0	0
K31-2	2012-07-02	KU1	6	2	Green	Apterous	1	0	0	0	0	0	0		0	0	0	0	0	0	0	0	0	0	0	0	0	0	0	0	0	0	0	0	0	1	0	1	0	0	0	0	0	0
K31-20	2012-07-02	KU1	6	3	Red	Apterous	0	0	0	0	0	1	0		0	0	0	0	0	0	0	0	0	0	0	0	0	0	0	0	0	0	0	0	0	1	0	0	0	0	0	0	1	0
K31-21	2012-07-02	KU1	6	3	Red	Apterous	0	0	0	0	0	0	0		0	0	0	0	0	0	0	0	0	0	0	0	0	0	0	0	0	0	0	0	0	0	1	0	0	0	0	0	0	0
K31-22	2012-07-02	KU1	6	3	Red	Apterous	0	0	0	0	0	0	0		0	0	0	0	0	0	0	0	0	0	0	0	0	0	0	0	0	0	0	0	0	0	1	0	0	0	0	0	0	0
K31-24	2012-07-02	KU1	6	4	Red	Apterous	0	0	0	1	0	0	0		0	0	0	0	0	0	0	0	0	0	0	0	0	0	0	0	0	0	0	0	0	1	0	0	0	0	1	0	0	0
K31-3	2012-07-02	KU1	6	3	Green	Apterous	1	0	0	1	0	0	0	13 bp	0	0	1	0	0	0	0	0	0	0	0	0	0	0	0	0	0	0	0	0	0	2	0	0	0	0	0	0	0	0
K31-5	2012-07-02	KU1	6	3	Green	Apterous	0	0	0	1	0	0	0		0	0	0	0	0	0	0	0	0	0	0	0	0	0	0	0	0	0	0	0	0	1	0	0	0	0	1	0	0	0
K31-6	2012-07-02	KU1	6	3	Green	Apterous	0	0	0	0	0	1	0		0	0	0	0	0	0	0	0	0	0	0	0	0	0	0	0	0	0	0	0	0	1	0	0	0	0	0	0	1	0
K31-7	2012-07-02	KU1	6	4	Green	Apterous	0	0	0	0	0	1	0	13 bp	0	0	0	0	0	0	0	0	0	0	0	0	0	0	0	0	0	0	0	0	0	1	0	0	0	0	0	0	1	0
K31-8	2012-07-02	KU1	6	3	Green	Apterous	1	0	0	1	0	0	0		0	0	1	0	0	0	0	0	0	0	0	0	0	0	0	0	0	0	0	0	0	2	0	0	0	0	0	0	0	0
K32-11	2012-07-02	KU2	6	2	Green	Apterous	1	0	0	0	1	1	0	13 bp	0	0	0	1	1	0	0	0	0	0	0	0	0	0	0	0	0	0	1	0	0	3	0	0	0	0	0	0	0	0
K32-12	2012-07-02	KU2	6	2	Green	Apterous	0	0	0	0	1	1	0		0	0	0	0	0	0	0	0	0	0	0	0	0	0	0	0	0	0	1	0	0	2	0	0	0	0	0	0	0	0
K32-20	2012-07-02	KU2	6	3	Red	Apterous	0	0	0	0	0	1	0		0	0	0	0	0	0	0	0	0	0	0	0	0	0	0	0	0	0	0	0	0	1	0	0	0	0	0	0	1	0
K32-1	2012-07-02	KU2	6	2	Green	Apterous	0	0	0	0	0	0	0	13 bp	0	0	0	0	0	0	0	0	0	0	0	0	0	0	0	0	0	0	0	0	0	0	1	0	0	0	0	0	0	0
K32-10	2012-07-02	KU2	6	2	Green	Apterous	0	1	0	0	0	0	0		0	0	0	0	0	0	0	0	0	0	0	0	0	0	0	0	0	0	0	0	0	1	0	0	1	0	0	0	0	0
K32-13	2012-07-02	KU2	6	2	Green	Apterous	1	0	0	0	0	0	0	13 bp	0	0	0	0	0	0	0	0	0	0	0	0	0	0	0	0	0	0	0	0	0	1	0	1	0	0	0	0	0	0
K32-14	2012-07-02	KU2	6	3	Red	Apterous	1	0	0	1	0	0	0	13 bp	0	0	1	0	0	0	0	0	0	0	0	0	0	0	0	0	0	0	0	0	0	2	0	0	0	0	0	0	0	0
K32-16	2012-07-02	KU2	6	3	Red	Apterous	1	0	0	0	1	0	0	13 bp	0	0	0	1	0	0	0	0	0	0	0	0	0	0	0	0	0	0	0	0	0	2	0	0	0	0	0	0	0	0
K32-17	2012-07-02	KU2	6	3	Red	Apterous	0	0	0	1	0	0	0		0	0	0	0	0	0	0	0	0	0	0	0	0	0	0	0	0	0	0	0	0	1	0	0	0	0	1	0	0	0
K32-18	2012-07-02	KU2	6	2	Red	Apterous	0	0	0	1	0	0	0	13 bp	0	0	0	0	0	0	0	0	0	0	0	0	0	0	0	0	0	0	0	0	0	1	0	0	0	0	1	0	0	0
K32-19	2012-07-02	KU2	6	3	Red	Apterous	0	0	0	0	0	0	0	13 bp	0	0	0	0	0	0	0	0	0	0	0	0	0	0	0	0	0	0	0	0	0	0	1	0	0	0	0	0	0	0
K32-2	2012-07-02	KU2	6	2	Green	Apterous	0	0	0	1	0	0	0	13 bp	0	0	0	0	0	0	0	0	0	0	0	0	0	0	0	0	0	0	0	0	0	1	0	0	0	0	1	0	0	0
K32-21	2012-07-02	KU2	6	3	Red	Apterous	1	0	0	0	0	0	0		0	0	0	0	0	0	0	0	0	0	0	0	0	0	0	0	0	0	0	0	0	1	0	1	0	0	0	0	0	0
K32-22	2012-07-02	KU2	6	3	Red	Apterous	1	0	0	0	1	0	0	13 bp	0	0	0	1	0	0	0	0	0	0	0	0	0	0	0	0	0	0	0	0	0	2	0	0	0	0	0	0	0	0
K32-23	2012-07-02	KU2	6	3	Red	Apterous	1	0	0	0	0	0	0		0	0	0	0	0	0	0	0	0	0	0	0	0	0	0	0	0	0	0	0	0	1	0	1	0	0	0	0	0	0
K32-24	2012-07-02	KU2	6	2	Red	Apterous	0	0	0	0	0	0	1		0	0	0	0	0	0	0	0	0	0	0	0	0	0	0	0	0	0	0	0	0	1	0	0	0	0	0	0	0	1
K32-3	2012-07-02	KU2	6	3	Green	Apterous	0	0	0	0	0	0	0		0	0	0	0	0	0	0	0	0	0	0	0	0	0	0	0	0	0	0	0	0	0	1	0	0	0	0	0	0	0
K32-4	2012-07-02	KU2	6	3	Green	Apterous	0	0	0	0	0	1	1		0	0	0	0	0	0	0	0	0	0	0	0	0	0	0	0	0	0	0	0	1	2	0	0	0	0	0	0	0	0
K32-5	2012-07-02	KU2	6	3	Green	Apterous	0	0	0	0	0	0	0	13 bp	0	0	0	0	0	0	0	0	0	0	0	0	0	0	0	0	0	0	0	0	0	0	1	0	0	0	0	0	0	0
K32-6	2012-07-02	KU2	6	3	Green	Apterous	0	0	0	1	0	1	0	13 bp	0	0	0	0	0	0	0	0	0	0	0	0	0	0	0	0	1	0	0	0	0	2	0	0	0	0	0	0	0	0
K32-7	2012-07-02	KU2	6	3	Green	Apterous	1	0	0	0	0	0	0	13 bp	0	0	0	0	0	0	0	0	0	0	0	0	0	0	0	0	0	0	0	0	0	1	0	1	0	0	0	0	0	0
K32-8	2012-07-02	KU2	6	3	Green	Apterous	0	0	0	0	0	1	1		0	0	0	0	0	0	0	0	0	0	0	0	0	0	0	0	0	0	0	0	1	2	0	0	0	0	0	0	0	0
K32-9	2012-07-02	KU2	6	2	Green	Apterous	0	0	0	0	0	0	0		0	0	0	0	0	0	0	0	0	0	0	0	0	0	0	0	0	0	0	0	0	0	1	0	0	0	0	0	0	0
K33-1	2012-07-02	KU3	6	5	Green	Apterous	0	0	0	0	0	0	0	13 bp	0	0	0	0	0	0	0	0	0	0	0	0	0	0	0	0	0	0	0	0	0	0	1	0	0	0	0	0	0	0
K33-10	2012-07-02	KU3	6	5	Green	Alate	1	0	0	0	0	0	0	13 bp	0	0	0	0	0	0	0	0	0	0	0	0	0	0	0	0	0	0	0	0	0	1	0	1	0	0	0	0	0	0
K33-11	2012-07-02	KU3	6	5	Green	Alate	0	0	0	0	0	0	0	13 bp	0	0	0	0	0	0	0	0	0	0	0	0	0	0	0	0	0	0	0	0	0	0	1	0	0	0	0	0	0	0
K33-12	2012-07-02	KU3	6	5	Green	Alate	1	0	0	1	0	0	0	13 bp	0	0	1	0	0	0	0	0	0	0	0	0	0	0	0	0	0	0	0	0	0	2	0	0	0	0	0	0	0	0
K33-13	2012-07-02	KU3	6	4	Green	Apterous	1	0	0	0	0	0	0	13 bp	0	0	0	0	0	0	0	0	0	0	0	0	0	0	0	0	0	0	0	0	0	1	0	1	0	0	0	0	0	0
K33-14	2012-07-02	KU3	6	5	Green	Apterous	1	0	0	1	0	0	0	13 bp	0	0	1	0	0	0	0	0	0	0	0	0	0	0	0	0	0	0	0	0	0	2	0	0	0	0	0	0	0	0
K33-15	2012-07-02	KU3	6	2	Green	Apterous	1	1	0	0	0	0	0	13 bp	1	0	0	0	0	0	0	0	0	0	0	0	0	0	0	0	0	0	0	0	0	2	0	0	0	0	0	0	0	0
K33-17	2012-07-02	KU3	6	5	Green	Alate	1	0	0	1	0	0	0	13 bp	0	0	1	0	0	0	0	0	0	0	0	0	0	0	0	0	0	0	0	0	0	2	0	0	0	0	0	0	0	0
K33-18	2012-07-02	KU3	6	5	Green	Apterous	0	0	0	0	0	0	0	13 bp	0	0	0	0	0	0	0	0	0	0	0	0	0	0	0	0	0	0	0	0	0	0	1	0	0	0	0	0	0	0
K33-2	2012-07-02	KU3	6	5	Green	Alate	0	0	0	0	0	0	0	13 bp	0	0	0	0	0	0	0	0	0	0	0	0	0	0	0	0	0	0	0	0	0	0	1	0	0	0	0	0	0	0
K33-20	2012-07-02	KU3	6	2	Green	Apterous	1	0	0	0	0	0	0	13 bp	0	0	0	0	0	0	0	0	0	0	0	0	0	0	0	0	0	0	0	0	0	1	0	1	0	0	0	0	0	0
K33-21	2012-07-02	KU3	6	2	Green	Apterous	0	0	0	0	0	0	0		0	0	0	0	0	0	0	0	0	0	0	0	0	0	0	0	0	0	0	0	0	0	1	0	0	0	0	0	0	0
K33-22	2012-07-02	KU3	6	2	Green	Apterous	0	0	0	0	0	0	0		0	0	0	0	0	0	0	0	0	0	0	0	0	0	0	0	0	0	0	0	0	0	1	0	0	0	0	0	0	0
K33-23	2012-07-02	KU3	6	2	Green	Apterous	0	0	0	0	0	0	0	13 bp	0	0	0	0	0	0	0	0	0	0	0	0	0	0	0	0	0	0	0	0	0	0	1	0	0	0	0	0	0	0
K33-24	2012-07-02	KU3	6	2	Green	Apterous	0	1	0	0	0	0	0	13 bp	0	0	0	0	0	0	0	0	0	0	0	0	0	0	0	0	0	0	0	0	0	1	0	0	1	0	0	0	0	0
K33-3	2012-07-02	KU3	6	5	Green	Apterous	0	0	0	0	0	0	0		0	0	0	0	0	0	0	0	0	0	0	0	0	0	0	0	0	0	0	0	0	0	1	0	0	0	0	0	0	0
K33-4	2012-07-02	KU3	6	5	Green	Apterous	1	0	0	0	0	0	1		0	0	0	0	0	1	0	0	0	0	0	0	0	0	0	0	0	0	0	0	0	2	0	0	0	0	0	0	0	0
K33-5	2012-07-02	KU3	6	5	Green	Alate	1	0	0	0	0	0	0		0	0	0	0	0	0	0	0	0	0	0	0	0	0	0	0	0	0	0	0	0	1	0	1	0	0	0	0	0	0
K33-6	2012-07-02	KU3	6	5	Green	Alate	0	0	0	0	0	0	0		0	0	0	0	0	0	0	0	0	0	0	0	0	0	0	0	0	0	0	0	0	0	1	0	0	0	0	0	0	0
K33-7	2012-07-02	KU3	6	5	Green	Apterous	1	0	0	0	0	0	0	13 bp	0	0	0	0	0	0	0	0	0	0	0	0	0	0	0	0	0	0	0	0	0	1	0	1	0	0	0	0	0	0
K33-8	2012-07-02	KU3	6	3	Green	Apterous	0	0	0	0	0	0	0	13 bp	0	0	0	0	0	0	0	0	0	0	0	0	0	0	0	0	0	0	0	0	0	0	1	0	0	0	0	0	0	0
K33-9	2012-07-02	KU3	6	5	Green	Apterous	0	0	0	0	0	0	0		0	0	0	0	0	0	0	0	0	0	0	0	0	0	0	0	0	0	0	0	0	0	1	0	0	0	0	0	0	0
K35-1	2012-07-02	KU5	6	4	Green	Apterous	0	0	0	1	0	0	0		0	0	0	0	0	0	0	0	0	0	0	0	0	0	0	0	0	0	0	0	0	1	0	0	0	0	1	0	0	0
K35-11	2012-07-02	KU5	6	3	Green	Apterous	0	0	0	0	0	1	0	13 bp	0	0	0	0	0	0	0	0	0	0	0	0	0	0	0	0	0	0	0	0	0	1	0	0	0	0	0	0	1	0
K35-12	2012-07-02	KU5	6	3	Green	Apterous	0	0	0	0	0	0	0		0	0	0	0	0	0	0	0	0	0	0	0	0	0	0	0	0	0	0	0	0	0	1	0	0	0	0	0	0	0
K35-13	2012-07-02	KU5	6	2	Green	Apterous	1	0	0	0	0	1	0	13 bp	0	0	0	0	1	0	0	0	0	0	0	0	0	0	0	0	0	0	0	0	0	2	0	0	0	0	0	0	0	0
K35-15	2012-07-02	KU5	6	3	Green	Apterous	0	1	0	0	0	0	0	13 bp	0	0	0	0	0	0	0	0	0	0	0	0	0	0	0	0	0	0	0	0	0	1	0	0	1	0	0	0	0	0
K35-16	2012-07-02	KU5	6	3	Green	Apterous	1	0	0	0	0	1	0	13 bp	0	0	0	0	1	0	0	0	0	0	0	0	0	0	0	0	0	0	0	0	0	2	0	0	0	0	0	0	0	0
K35-17	2012-07-02	KU5	6	3	Green	Apterous	0	0	1	0	1	0	0		0	0	0	0	0	0	0	0	0	0	0	0	1	0	0	0	0	0	0	0	0	2	0	0	0	0	0	0	0	0
K35-18	2012-07-02	KU5	6	2	Green	Apterous	0	0	0	0	0	1	0		0	0	0	0	0	0	0	0	0	0	0	0	0	0	0	0	0	0	0	0	0	1	0	0	0	0	0	0	1	0
K35-19	2012-07-02	KU5	6	5	Green	Apterous	1	0	0	1	0	0	0	13 bp	0	0	1	0	0	0	0	0	0	0	0	0	0	0	0	0	0	0	0	0	0	2	0	0	0	0	0	0	0	0
K35-2	2012-07-02	KU5	6	4	Green	Apterous	1	0	0	0	0	0	0	13 bp	0	0	0	0	0	0	0	0	0	0	0	0	0	0	0	0	0	0	0	0	0	1	0	1	0	0	0	0	0	0
K35-20	2012-07-02	KU5	6	3	Green	Apterous	1	0	0	0	0	0	0	13 bp	0	0	0	0	0	0	0	0	0	0	0	0	0	0	0	0	0	0	0	0	0	1	0	1	0	0	0	0	0	0
K35-21	2012-07-02	KU5	6	4	Green	Apterous	1	0	0	1	0	0	0	13 bp	0	0	1	0	0	0	0	0	0	0	0	0	0	0	0	0	0	0	0	0	0	2	0	0	0	0	0	0	0	0
K35-22	2012-07-02	KU5	6	4	Green	Apterous	1	0	0	0	0	0	0	13 bp	0	0	0	0	0	0	0	0	0	0	0	0	0	0	0	0	0	0	0	0	0	1	0	1	0	0	0	0	0	0
K35-23	2012-07-02	KU5	6	3	Green	Apterous	1	0	0	0	0	0	0		0	0	0	0	0	0	0	0	0	0	0	0	0	0	0	0	0	0	0	0	0	1	0	1	0	0	0	0	0	0
K35-24	2012-07-02	KU5	6	3	Green	Apterous	1	0	0	0	0	0	0		0	0	0	0	0	0	0	0	0	0	0	0	0	0	0	0	0	0	0	0	0	1	0	1	0	0	0	0	0	0
K35-3	2012-07-02	KU5	6	4	Green	Apterous	1	0	0	0	0	0	0		0	0	0	0	0	0	0	0	0	0	0	0	0	0	0	0	0	0	0	0	0	1	0	1	0	0	0	0	0	0
K35-4	2012-07-02	KU5	6	4	Green	Apterous	0	0	0	1	0	0	0	13 bp	0	0	0	0	0	0	0	0	0	0	0	0	0	0	0	0	0	0	0	0	0	1	0	0	0	0	1	0	0	0
K35-5	2012-07-02	KU5	6	4	Green	Apterous	0	1	0	1	0	0	0	13 bp	0	0	0	0	0	0	0	1	0	0	0	0	0	0	0	0	0	0	0	0	0	2	0	0	0	0	0	0	0	0
K35-6	2012-07-02	KU5	6	4	Green	Apterous	0	0	0	0	0	0	0		0	0	0	0	0	0	0	0	0	0	0	0	0	0	0	0	0	0	0	0	0	0	1	0	0	0	0	0	0	0
K35-7	2012-07-02	KU5	6	2	Green	Apterous	0	0	0	0	0	1	0	13 bp	0	0	0	0	0	0	0	0	0	0	0	0	0	0	0	0	0	0	0	0	0	1	0	0	0	0	0	0	1	0
K35-8	2012-07-02	KU5	6	2	Green	Apterous	0	0	0	0	0	0	0		0	0	0	0	0	0	0	0	0	0	0	0	0	0	0	0	0	0	0	0	0	0	1	0	0	0	0	0	0	0
K35-9	2012-07-02	KU5	6	3	Green	Apterous	0	0	0	0	0	0	0		0	0	0	0	0	0	0	0	0	0	0	0	0	0	0	0	0	0	0	0	0	0	1	0	0	0	0	0	0	0
K35-10	2012-07-02	KU5	6	3	Green	Apterous	0	0	0	0	0	0	0		0	0	0	0	0	0	0	0	0	0	0	0	0	0	0	0	0	0	0	0	0	0	1	0	0	0	0	0	0	0
K35-14	2012-07-02	KU5	6	2	Green	Apterous	1	0	0	0	0	0	0		0	0	0	0	0	0	0	0	0	0	0	0	0	0	0	0	0	0	0	0	0	1	0	1	0	0	0	0	0	0
K36-17	2012-07-02	KU6	6	5	Green	Apterous	0	1	0	0	0	1	0		0	0	0	0	0	0	0	0	0	1	0	0	0	0	0	0	0	0	0	0	0	2	0	0	0	0	0	0	0	0
K36-1	2012-07-02	KU6	6	5	Green	Apterous	1	1	0	0	0	0	0	13 bp	1	0	0	0	0	0	0	0	0	0	0	0	0	0	0	0	0	0	0	0	0	2	0	0	0	0	0	0	0	0
K36-10	2012-07-02	KU6	6	3	Green	Apterous	1	0	0	0	0	0	0		0	0	0	0	0	0	0	0	0	0	0	0	0	0	0	0	0	0	0	0	0	1	0	1	0	0	0	0	0	0
K36-11	2012-07-02	KU6	6	4	Green	Apterous	0	0	0	0	0	0	0		0	0	0	0	0	0	0	0	0	0	0	0	0	0	0	0	0	0	0	0	0	0	1	0	0	0	0	0	0	0
K36-13	2012-07-02	KU6	6	2	Green	Apterous	1	0	0	0	0	0	0		0	0	0	0	0	0	0	0	0	0	0	0	0	0	0	0	0	0	0	0	0	1	0	1	0	0	0	0	0	0
K36-14	2012-07-02	KU6	6	5	Green	Apterous	0	0	0	1	0	0	0		0	0	0	0	0	0	0	0	0	0	0	0	0	0	0	0	0	0	0	0	0	1	0	0	0	0	1	0	0	0
K36-15	2012-07-02	KU6	6	5	Green	Alate	0	0	0	0	0	0	0	13 bp	0	0	0	0	0	0	0	0	0	0	0	0	0	0	0	0	0	0	0	0	0	0	1	0	0	0	0	0	0	0
K36-16	2012-07-02	KU6	6	5	Green	Apterous	0	0	0	0	0	0	0	13 bp	0	0	0	0	0	0	0	0	0	0	0	0	0	0	0	0	0	0	0	0	0	0	1	0	0	0	0	0	0	0
K36-18	2012-07-02	KU6	6	4	Green	Apterous	0	0	0	0	0	0	0	13 bp	0	0	0	0	0	0	0	0	0	0	0	0	0	0	0	0	0	0	0	0	0	0	1	0	0	0	0	0	0	0
K36-2	2012-07-02	KU6	6	5	Green	Apterous	0	0	0	0	0	0	0	13 bp	0	0	0	0	0	0	0	0	0	0	0	0	0	0	0	0	0	0	0	0	0	0	1	0	0	0	0	0	0	0
K36-20	2012-07-02	KU6	6	2	Green	Apterous	0	0	0	0	0	0	0		0	0	0	0	0	0	0	0	0	0	0	0	0	0	0	0	0	0	0	0	0	0	1	0	0	0	0	0	0	0
K36-21	2012-07-02	KU6	6	2	Green	Apterous	0	0	0	0	0	0	0		0	0	0	0	0	0	0	0	0	0	0	0	0	0	0	0	0	0	0	0	0	0	1	0	0	0	0	0	0	0
K36-22	2012-07-02	KU6	6	2	Green	Apterous	1	0	0	0	0	0	0		0	0	0	0	0	0	0	0	0	0	0	0	0	0	0	0	0	0	0	0	0	1	0	1	0	0	0	0	0	0
K36-23	2012-07-02	KU6	6	3	Green	Apterous	1	0	0	0	0	1	0		0	0	0	0	1	0	0	0	0	0	0	0	0	0	0	0	0	0	0	0	0	2	0	0	0	0	0	0	0	0
K36-24	2012-07-02	KU6	6	2	Green	Apterous	0	0	0	0	0	0	0	13 bp	0	0	0	0	0	0	0	0	0	0	0	0	0	0	0	0	0	0	0	0	0	0	1	0	0	0	0	0	0	0
K36-3	2012-07-02	KU6	6	5	Green	Alate	1	0	0	0	1	0	0	13 bp	0	0	0	1	0	0	0	0	0	0	0	0	0	0	0	0	0	0	0	0	0	2	0	0	0	0	0	0	0	0
K36-4	2012-07-02	KU6	6	5	Green	Apterous	0	0	0	0	0	0	0	13 bp	0	0	0	0	0	0	0	0	0	0	0	0	0	0	0	0	0	0	0	0	0	0	1	0	0	0	0	0	0	0
K36-6	2012-07-02	KU6	6	3	Green	Apterous	0	1	0	0	0	0	0	13 bp	0	0	0	0	0	0	0	0	0	0	0	0	0	0	0	0	0	0	0	0	0	1	0	0	1	0	0	0	0	0
K36-7	2012-07-02	KU6	6	5	Green	Apterous	1	0	0	0	0	0	0		0	0	0	0	0	0	0	0	0	0	0	0	0	0	0	0	0	0	0	0	0	1	0	1	0	0	0	0	0	0
K36-8	2012-07-02	KU6	6	5	Green	Apterous	0	1	0	0	0	0	0	13 bp	0	0	0	0	0	0	0	0	0	0	0	0	0	0	0	0	0	0	0	0	0	1	0	0	1	0	0	0	0	0
K36-9	2012-07-02	KU6	6	5	Green	Apterous	1	0	0	1	0	0	0	13 bp	0	0	1	0	0	0	0	0	0	0	0	0	0	0	0	0	0	0	0	0	0	2	0	0	0	0	0	0	0	0
K36-5	2012-07-02	KU6	6	2	Green	Apterous	0	0	1	0	0	0	0	13 bp	0	0	0	0	0	0	0	0	0	0	0	0	0	0	0	0	0	0	0	0	0	1	0	0	0	1	0	0	0	0
K36-12	2012-07-02	KU6	6	3	Green	Apterous	1	1	0	0	0	0	0	13 bp	1	0	0	0	0	0	0	0	0	0	0	0	0	0	0	0	0	0	0	0	0	2	0	0	0	0	0	0	0	0
K36-19	2012-07-02	KU6	6	2	Green	Apterous	1	0	0	1	0	0	0	13 bp	0	0	1	0	0	0	0	0	0	0	0	0	0	0	0	0	0	0	0	0	0	2	0	0	0	0	0	0	0	0
K37-15	2012-07-18	KU1	7	5	Green	Alate	1	0	0	0	0	1	0	13 bp	0	0	0	0	1	0	0	0	0	0	0	0	0	0	0	0	0	0	0	0	0	2	0	0	0	0	0	0	0	0
K37-23	2012-07-18	KU1	7	5	Green	Alate	1	0	0	0	0	1	0	13 bp	0	0	0	0	1	0	0	0	0	0	0	0	0	0	0	0	0	0	0	0	0	2	0	0	0	0	0	0	0	0
K37-24	2012-07-18	KU1	7	5	Green	Alate	0	0	0	0	0	1	0		0	0	0	0	0	0	0	0	0	0	0	0	0	0	0	0	0	0	0	0	0	1	0	0	0	0	0	0	1	0
K37-8	2012-07-18	KU1	7	5	Green	Alate	0	0	0	0	0	1	0		0	0	0	0	0	0	0	0	0	0	0	0	0	0	0	0	0	0	0	0	0	1	0	0	0	0	0	0	1	0
K37-1	2012-07-18	KU1	7	5	Green	Alate	0	0	0	0	0	0	0		0	0	0	0	0	0	0	0	0	0	0	0	0	0	0	0	0	0	0	0	0	0	1	0	0	0	0	0	0	0
K37-10	2012-07-18	KU1	7	5	Green	Alate	1	0	0	0	0	0	0		0	0	0	0	0	0	0	0	0	0	0	0	0	0	0	0	0	0	0	0	0	1	0	1	0	0	0	0	0	0
K37-11	2012-07-18	KU1	7	5	Green	Alate	1	0	0	1	0	0	0		0	0	1	0	0	0	0	0	0	0	0	0	0	0	0	0	0	0	0	0	0	2	0	0	0	0	0	0	0	0
K37-12	2012-07-18	KU1	7	5	Green	Alate	1	0	0	0	0	0	0	13 bp	0	0	0	0	0	0	0	0	0	0	0	0	0	0	0	0	0	0	0	0	0	1	0	1	0	0	0	0	0	0
K37-13	2012-07-18	KU1	7	5	Green	Alate	1	0	0	0	0	0	0	13 bp	0	0	0	0	0	0	0	0	0	0	0	0	0	0	0	0	0	0	0	0	0	1	0	1	0	0	0	0	0	0
K37-14	2012-07-18	KU1	7	5	Green	Alate	1	0	0	0	0	0	1	13 bp	0	0	0	0	0	1	0	0	0	0	0	0	0	0	0	0	0	0	0	0	0	2	0	0	0	0	0	0	0	0
K37-16	2012-07-18	KU1	7	5	Green	Alate	0	0	0	0	0	0	0	13 bp	0	0	0	0	0	0	0	0	0	0	0	0	0	0	0	0	0	0	0	0	0	0	1	0	0	0	0	0	0	0
K37-17	2012-07-18	KU1	7	5	Green	Alate	1	1	0	0	0	0	0	13 bp	1	0	0	0	0	0	0	0	0	0	0	0	0	0	0	0	0	0	0	0	0	2	0	0	0	0	0	0	0	0
K37-18	2012-07-18	KU1	7	5	Green	Alate	0	0	0	0	0	0	0		0	0	0	0	0	0	0	0	0	0	0	0	0	0	0	0	0	0	0	0	0	0	1	0	0	0	0	0	0	0
K37-19	2012-07-18	KU1	7	5	Green	Alate	1	0	0	0	0	0	0		0	0	0	0	0	0	0	0	0	0	0	0	0	0	0	0	0	0	0	0	0	1	0	1	0	0	0	0	0	0
K37-2	2012-07-18	KU1	7	5	Green	Alate	0	1	0	0	0	0	0		0	0	0	0	0	0	0	0	0	0	0	0	0	0	0	0	0	0	0	0	0	1	0	0	1	0	0	0	0	0
K37-20	2012-07-18	KU1	7	5	Green	Alate	0	0	0	0	0	0	0	13 bp	0	0	0	0	0	0	0	0	0	0	0	0	0	0	0	0	0	0	0	0	0	0	1	0	0	0	0	0	0	0
K37-21	2012-07-18	KU1	7	5	Green	Alate	1	0	0	0	1	0	0	13 bp	0	0	0	1	0	0	0	0	0	0	0	0	0	0	0	0	0	0	0	0	0	2	0	0	0	0	0	0	0	0
K37-22	2012-07-18	KU1	7	5	Green	Alate	1	0	0	0	0	0	0	13 bp	0	0	0	0	0	0	0	0	0	0	0	0	0	0	0	0	0	0	0	0	0	1	0	1	0	0	0	0	0	0
K37-3	2012-07-18	KU1	7	5	Green	Alate	1	0	0	0	0	0	0	13 bp	0	0	0	0	0	0	0	0	0	0	0	0	0	0	0	0	0	0	0	0	0	1	0	1	0	0	0	0	0	0
K37-4	2012-07-18	KU1	7	5	Green	Alate	1	0	0	0	0	0	0		0	0	0	0	0	0	0	0	0	0	0	0	0	0	0	0	0	0	0	0	0	1	0	1	0	0	0	0	0	0
K37-5	2012-07-18	KU1	7	5	Green	Alate	1	1	0	0	0	0	0		1	0	0	0	0	0	0	0	0	0	0	0	0	0	0	0	0	0	0	0	0	2	0	0	0	0	0	0	0	0
K37-7	2012-07-18	KU1	7	5	Green	Alate	1	1	0	0	0	0	0		1	0	0	0	0	0	0	0	0	0	0	0	0	0	0	0	0	0	0	0	0	2	0	0	0	0	0	0	0	0
K37-9	2012-07-18	KU1	7	5	Green	Alate	0	1	0	0	0	0	0	13 bp	0	0	0	0	0	0	0	0	0	0	0	0	0	0	0	0	0	0	0	0	0	1	0	0	1	0	0	0	0	0
K37-6	2012-07-18	KU1	7	5	Green	Alate	1	0	0	0	0	0	0		0	0	0	0	0	0	0	0	0	0	0	0	0	0	0	0	0	0	0	0	0	1	0	1	0	0	0	0	0	0
K38-1	2012-07-18	KU2	7	5	Green	Alate	0	1	0	0	0	0	1	13 bp	0	0	0	0	0	0	0	0	0	0	1	0	0	0	0	0	0	0	0	0	0	2	0	0	0	0	0	0	0	0
K38-10	2012-07-18	KU2	7	5	Green	Alate	1	0	0	0	0	0	0	13 bp	0	0	0	0	0	0	0	0	0	0	0	0	0	0	0	0	0	0	0	0	0	1	0	1	0	0	0	0	0	0
K38-11	2012-07-18	KU2	7	5	Green	Alate	1	1	0	0	0	0	0	13 bp	1	0	0	0	0	0	0	0	0	0	0	0	0	0	0	0	0	0	0	0	0	2	0	0	0	0	0	0	0	0
K38-12	2012-07-18	KU2	7	5	Green	Alate	1	0	0	1	0	0	0	13 bp	0	0	1	0	0	0	0	0	0	0	0	0	0	0	0	0	0	0	0	0	0	2	0	0	0	0	0	0	0	0
K38-13	2012-07-18	KU2	7	5	Green	Alate	1	0	0	1	0	0	0		0	0	1	0	0	0	0	0	0	0	0	0	0	0	0	0	0	0	0	0	0	2	0	0	0	0	0	0	0	0
K38-14	2012-07-18	KU2	7	5	Green	Alate	1	0	0	0	0	0	0	13 bp	0	0	0	0	0	0	0	0	0	0	0	0	0	0	0	0	0	0	0	0	0	1	0	1	0	0	0	0	0	0
K38-15	2012-07-18	KU2	7	5	Green	Alate	1	0	0	0	0	0	0	13 bp	0	0	0	0	0	0	0	0	0	0	0	0	0	0	0	0	0	0	0	0	0	1	0	1	0	0	0	0	0	0
K38-16	2012-07-18	KU2	7	5	Green	Alate	0	0	0	0	0	0	0		0	0	0	0	0	0	0	0	0	0	0	0	0	0	0	0	0	0	0	0	0	0	1	0	0	0	0	0	0	0
K38-18	2012-07-18	KU2	7	5	Green	Alate	1	1	0	0	0	0	0	13 bp	1	0	0	0	0	0	0	0	0	0	0	0	0	0	0	0	0	0	0	0	0	2	0	0	0	0	0	0	0	0
K38-19	2012-07-18	KU2	7	5	Green	Alate	1	0	0	0	0	0	0	13 bp	0	0	0	0	0	0	0	0	0	0	0	0	0	0	0	0	0	0	0	0	0	1	0	1	0	0	0	0	0	0
K38-2	2012-07-18	KU2	7	5	Green	Alate	1	1	0	0	0	0	0		1	0	0	0	0	0	0	0	0	0	0	0	0	0	0	0	0	0	0	0	0	2	0	0	0	0	0	0	0	0
K38-20	2012-07-18	KU2	7	5	Green	Alate	1	1	0	0	0	0	0		1	0	0	0	0	0	0	0	0	0	0	0	0	0	0	0	0	0	0	0	0	2	0	0	0	0	0	0	0	0
K38-21	2012-07-18	KU2	7	5	Green	Alate	1	1	0	0	0	0	0		1	0	0	0	0	0	0	0	0	0	0	0	0	0	0	0	0	0	0	0	0	2	0	0	0	0	0	0	0	0
K38-22	2012-07-18	KU2	7	5	Green	Alate	1	0	0	1	0	0	0		0	0	1	0	0	0	0	0	0	0	0	0	0	0	0	0	0	0	0	0	0	2	0	0	0	0	0	0	0	0
K38-23	2012-07-18	KU2	7	5	Green	Alate	1	0	1	0	0	1	0		0	1	0	0	1	0	0	0	0	0	0	0	0	1	0	0	0	0	0	0	0	3	0	0	0	0	0	0	0	0
K38-24	2012-07-18	KU2	7	5	Green	Alate	1	0	0	1	0	0	0		0	0	1	0	0	0	0	0	0	0	0	0	0	0	0	0	0	0	0	0	0	2	0	0	0	0	0	0	0	0
K38-3	2012-07-18	KU2	7	5	Green	Alate	0	1	0	0	0	0	0	13 bp	0	0	0	0	0	0	0	0	0	0	0	0	0	0	0	0	0	0	0	0	0	1	0	0	1	0	0	0	0	0
K38-5	2012-07-18	KU2	7	5	Green	Alate	1	0	0	1	0	0	0	13 bp	0	0	1	0	0	0	0	0	0	0	0	0	0	0	0	0	0	0	0	0	0	2	0	0	0	0	0	0	0	0
K38-6	2012-07-18	KU2	7	5	Green	Alate	1	0	0	0	0	0	0	13 bp	0	0	0	0	0	0	0	0	0	0	0	0	0	0	0	0	0	0	0	0	0	1	0	1	0	0	0	0	0	0
K38-8	2012-07-18	KU2	7	5	Green	Alate	0	1	0	0	0	0	0	13 bp	0	0	0	0	0	0	0	0	0	0	0	0	0	0	0	0	0	0	0	0	0	1	0	0	1	0	0	0	0	0
K38-9	2012-07-18	KU2	7	5	Green	Alate	1	0	0	1	0	0	0	13 bp	0	0	1	0	0	0	0	0	0	0	0	0	0	0	0	0	0	0	0	0	0	2	0	0	0	0	0	0	0	0
K38-17	2012-07-18	KU2	7	5	Green	Alate	0	0	1	0	0	0	0		0	0	0	0	0	0	0	0	0	0	0	0	0	0	0	0	0	0	0	0	0	1	0	0	0	1	0	0	0	0
K38-4	2012-07-18	KU2	7	5	Green	Alate	1	0	0	1	0	0	0	13 bp	0	0	1	0	0	0	0	0	0	0	0	0	0	0	0	0	0	0	0	0	0	2	0	0	0	0	0	0	0	0
K38-7	2012-07-18	KU2	7	5	Green	Alate	1	0	0	0	0	0	0		0	0	0	0	0	0	0	0	0	0	0	0	0	0	0	0	0	0	0	0	0	1	0	1	0	0	0	0	0	0
K39-23	2012-07-18	KU3	7	5	Green	Alate	1	0	0	0	0	1	0		0	0	0	0	1	0	0	0	0	0	0	0	0	0	0	0	0	0	0	0	0	2	0	0	0	0	0	0	0	0
K39-1	2012-07-18	KU3	7	3	Red	Alate	0	0	0	0	0	0	0	13 bp	0	0	0	0	0	0	0	0	0	0	0	0	0	0	0	0	0	0	0	0	0	0	1	0	0	0	0	0	0	0
K39-10	2012-07-18	KU3	7	5	Red	Alate	1	0	0	0	0	0	0	13 bp	0	0	0	0	0	0	0	0	0	0	0	0	0	0	0	0	0	0	0	0	0	1	0	1	0	0	0	0	0	0
K39-11	2012-07-18	KU3	7	5	Red	Alate	1	0	0	0	0	0	0	13 bp	0	0	0	0	0	0	0	0	0	0	0	0	0	0	0	0	0	0	0	0	0	1	0	1	0	0	0	0	0	0
K39-12	2012-07-18	KU3	7	5	Red	Alate	0	0	0	0	0	0	0	13 bp	0	0	0	0	0	0	0	0	0	0	0	0	0	0	0	0	0	0	0	0	0	0	1	0	0	0	0	0	0	0
K39-13	2012-07-18	KU3	7	5	Red	Alate	0	0	0	0	0	0	0		0	0	0	0	0	0	0	0	0	0	0	0	0	0	0	0	0	0	0	0	0	0	1	0	0	0	0	0	0	0
K39-14	2012-07-18	KU3	7	5	Red	Alate	1	1	0	0	0	0	0	13 bp	1	0	0	0	0	0	0	0	0	0	0	0	0	0	0	0	0	0	0	0	0	2	0	0	0	0	0	0	0	0
K39-15	2012-07-18	KU3	7	5	Red	Alate	1	0	0	0	0	0	0	13 bp	0	0	0	0	0	0	0	0	0	0	0	0	0	0	0	0	0	0	0	0	0	1	0	1	0	0	0	0	0	0
K39-16	2012-07-18	KU3	7	5	Red	Alate	0	0	0	0	0	0	1	13 bp	0	0	0	0	0	0	0	0	0	0	0	0	0	0	0	0	0	0	0	0	0	1	0	0	0	0	0	0	0	1
K39-17	2012-07-18	KU3	7	5	Red	Alate	0	0	0	0	0	0	0	13 bp	0	0	0	0	0	0	0	0	0	0	0	0	0	0	0	0	0	0	0	0	0	0	1	0	0	0	0	0	0	0
K39-18	2012-07-18	KU3	7	5	Green	Alate	1	1	0	0	0	0	0	13 bp	1	0	0	0	0	0	0	0	0	0	0	0	0	0	0	0	0	0	0	0	0	2	0	0	0	0	0	0	0	0
K39-19	2012-07-18	KU3	7	5	Green	Alate	1	1	0	0	0	0	0	13 bp	1	0	0	0	0	0	0	0	0	0	0	0	0	0	0	0	0	0	0	0	0	2	0	0	0	0	0	0	0	0
K39-2	2012-07-18	KU3	7	5	Red	Alate	1	0	0	0	0	0	0		0	0	0	0	0	0	0	0	0	0	0	0	0	0	0	0	0	0	0	0	0	1	0	1	0	0	0	0	0	0
K39-20	2012-07-18	KU3	7	5	Green	Alate	1	0	0	0	0	0	0		0	0	0	0	0	0	0	0	0	0	0	0	0	0	0	0	0	0	0	0	0	1	0	1	0	0	0	0	0	0
K39-21	2012-07-18	KU3	7	5	Green	Alate	1	0	0	0	0	0	0	13 bp	0	0	0	0	0	0	0	0	0	0	0	0	0	0	0	0	0	0	0	0	0	1	0	1	0	0	0	0	0	0
K39-22	2012-07-18	KU3	7	5	Green	Alate	1	1	0	0	0	0	0		1	0	0	0	0	0	0	0	0	0	0	0	0	0	0	0	0	0	0	0	0	2	0	0	0	0	0	0	0	0
K39-24	2012-07-18	KU3	7	5	Green	Alate	0	0	0	0	0	0	0	13 bp	0	0	0	0	0	0	0	0	0	0	0	0	0	0	0	0	0	0	0	0	0	0	1	0	0	0	0	0	0	0
K39-6	2012-07-18	KU3	7	5	Red	Alate	0	0	0	0	0	0	0		0	0	0	0	0	0	0	0	0	0	0	0	0	0	0	0	0	0	0	0	0	0	1	0	0	0	0	0	0	0
K39-8	2012-07-18	KU3	7	5	Red	Alate	0	0	0	1	0	0	0		0	0	0	0	0	0	0	0	0	0	0	0	0	0	0	0	0	0	0	0	0	1	0	0	0	0	1	0	0	0
K39-9	2012-07-18	KU3	7	5	Red	Alate	1	0	0	0	1	0	0		0	0	0	1	0	0	0	0	0	0	0	0	0	0	0	0	0	0	0	0	0	2	0	0	0	0	0	0	0	0
K39-4	2012-07-18	KU3	7	5	Red	Alate	1	0	0	0	0	0	0	13 bp	0	0	0	0	0	0	0	0	0	0	0	0	0	0	0	0	0	0	0	0	0	1	0	1	0	0	0	0	0	0
K39-5	2012-07-18	KU3	7	5	Red	Alate	1	1	0	0	0	0	0		1	0	0	0	0	0	0	0	0	0	0	0	0	0	0	0	0	0	0	0	0	2	0	0	0	0	0	0	0	0
K39-7	2012-07-18	KU3	7	5	Red	Alate	1	0	0	0	0	0	0	13 bp	0	0	0	0	0	0	0	0	0	0	0	0	0	0	0	0	0	0	0	0	0	1	0	1	0	0	0	0	0	0
K39-3	2012-07-18	KU3	7	5	Red	Alate	1	1	0	0	0	1	0		1	0	0	0	1	0	0	0	0	1	0	0	0	0	0	0	0	0	0	0	0	3	0	0	0	0	0	0	0	0
K40-10	2012-07-18	KU4	7	3	Green	Apterous	1	1	0	0	0	0	0		1	0	0	0	0	0	0	0	0	0	0	0	0	0	0	0	0	0	0	0	0	2	0	0	0	0	0	0	0	0
K40-11	2012-07-18	KU4	7	5	Green	Alate	1	1	0	0	1	0	0	13 bp	1	0	0	1	0	0	0	0	1	0	0	0	0	0	0	0	0	0	0	0	0	3	0	0	0	0	0	0	0	0
K40-12	2012-07-18	KU4	7	5	Green	Alate	0	0	0	0	0	0	0	13 bp	0	0	0	0	0	0	0	0	0	0	0	0	0	0	0	0	0	0	0	0	0	0	1	0	0	0	0	0	0	0
K40-13	2012-07-18	KU4	7	5	Red	Alate	1	0	0	0	0	0	0	13 bp	0	0	0	0	0	0	0	0	0	0	0	0	0	0	0	0	0	0	0	0	0	1	0	1	0	0	0	0	0	0
K40-14	2012-07-18	KU4	7	3	Red	Apterous	0	0	0	0	0	0	0		0	0	0	0	0	0	0	0	0	0	0	0	0	0	0	0	0	0	0	0	0	0	1	0	0	0	0	0	0	0
K40-15	2012-07-18	KU4	7	5	Red	Alate	0	0	0	0	0	0	0	13 bp	0	0	0	0	0	0	0	0	0	0	0	0	0	0	0	0	0	0	0	0	0	0	1	0	0	0	0	0	0	0
K40-16	2012-07-18	KU4	7	3	Red	Apterous	1	0	0	0	0	0	0	13 bp	0	0	0	0	0	0	0	0	0	0	0	0	0	0	0	0	0	0	0	0	0	1	0	1	0	0	0	0	0	0
K40-17	2012-07-18	KU4	7	3	Red	Apterous	1	0	0	0	0	0	0	13 bp	0	0	0	0	0	0	0	0	0	0	0	0	0	0	0	0	0	0	0	0	0	1	0	1	0	0	0	0	0	0
K40-18	2012-07-18	KU4	7	5	Red	Alate	1	0	0	0	0	0	0	13 bp	0	0	0	0	0	0	0	0	0	0	0	0	0	0	0	0	0	0	0	0	0	1	0	1	0	0	0	0	0	0
K40-19	2012-07-18	KU4	7	3	Red	Apterous	0	0	0	0	0	0	0	13 bp	0	0	0	0	0	0	0	0	0	0	0	0	0	0	0	0	0	0	0	0	0	0	1	0	0	0	0	0	0	0
K40-20	2012-07-18	KU4	7	4	Red	Apterous	1	0	0	1	0	0	0	13 bp	0	0	1	0	0	0	0	0	0	0	0	0	0	0	0	0	0	0	0	0	0	2	0	0	0	0	0	0	0	0
K40-22	2012-07-18	KU4	7	2	Red	Apterous	0	0	0	0	0	0	0	13 bp	0	0	0	0	0	0	0	0	0	0	0	0	0	0	0	0	0	0	0	0	0	0	1	0	0	0	0	0	0	0
K40-23	2012-07-18	KU4	7	3	Red	Apterous	1	0	0	0	0	0	0	13 bp	0	0	0	0	0	0	0	0	0	0	0	0	0	0	0	0	0	0	0	0	0	1	0	1	0	0	0	0	0	0
K40-24	2012-07-18	KU4	7	3	Red	Apterous	1	0	0	0	0	0	0	13 bp	0	0	0	0	0	0	0	0	0	0	0	0	0	0	0	0	0	0	0	0	0	1	0	1	0	0	0	0	0	0
K40-3	2012-07-18	KU4	7	3	Green	Apterous	0	1	0	0	0	0	0	13 bp	0	0	0	0	0	0	0	0	0	0	0	0	0	0	0	0	0	0	0	0	0	1	0	0	1	0	0	0	0	0
K40-4	2012-07-18	KU4	7	3	Green	Apterous	1	0	0	0	0	0	0	13 bp	0	0	0	0	0	0	0	0	0	0	0	0	0	0	0	0	0	0	0	0	0	1	0	1	0	0	0	0	0	0
K40-5	2012-07-18	KU4	7	3	Green	Apterous	1	0	0	0	0	0	0		0	0	0	0	0	0	0	0	0	0	0	0	0	0	0	0	0	0	0	0	0	1	0	1	0	0	0	0	0	0
K40-6	2012-07-18	KU4	7	5	Green	Alate	0	0	0	0	0	1	0		0	0	0	0	0	0	0	0	0	0	0	0	0	0	0	0	0	0	0	0	0	1	0	0	0	0	0	0	1	0
K40-7	2012-07-18	KU4	7	5	Green	Alate	0	0	0	1	0	0	0	13 bp	0	0	0	0	0	0	0	0	0	0	0	0	0	0	0	0	0	0	0	0	0	1	0	0	0	0	1	0	0	0
K40-9	2012-07-18	KU4	7	3	Green	Apterous	1	0	0	1	0	0	0		0	0	1	0	0	0	0	0	0	0	0	0	0	0	0	0	0	0	0	0	0	2	0	0	0	0	0	0	0	0
K40-1	2012-07-18	KU4	7	5	Green	Alate	1	0	0	0	0	0	0	13 bp	0	0	0	0	0	0	0	0	0	0	0	0	0	0	0	0	0	0	0	0	0	1	0	1	0	0	0	0	0	0
K40-8	2012-07-18	KU4	7	4	Green	Apterous	1	0	0	0	0	1	0		0	0	0	0	1	0	0	0	0	0	0	0	0	0	0	0	0	0	0	0	0	2	0	0	0	0	0	0	0	0
K41-6	2012-07-18	KU5	7	5	Red	Alate	0	0	0	1	0	1	0		0	0	0	0	0	0	0	0	0	0	0	0	0	0	0	0	1	0	0	0	0	2	0	0	0	0	0	0	0	0
K41-1	2012-07-18	KU5	7	5	Red	Alate	1	1	0	0	0	0	0		1	0	0	0	0	0	0	0	0	0	0	0	0	0	0	0	0	0	0	0	0	2	0	0	0	0	0	0	0	0
K41-10	2012-07-18	KU5	7	5	Green	Alate	0	0	0	0	0	0	0		0	0	0	0	0	0	0	0	0	0	0	0	0	0	0	0	0	0	0	0	0	0	1	0	0	0	0	0	0	0
K41-11	2012-07-18	KU5	7	5	Green	Alate	1	0	0	0	0	0	0		0	0	0	0	0	0	0	0	0	0	0	0	0	0	0	0	0	0	0	0	0	1	0	1	0	0	0	0	0	0
K41-12	2012-07-18	KU5	7	5	Green	Alate	1	0	0	0	0	0	0		0	0	0	0	0	0	0	0	0	0	0	0	0	0	0	0	0	0	0	0	0	1	0	1	0	0	0	0	0	0
K41-13	2012-07-18	KU5	7	5	Green	Alate	0	1	0	0	0	0	0	13 bp	0	0	0	0	0	0	0	0	0	0	0	0	0	0	0	0	0	0	0	0	0	1	0	0	1	0	0	0	0	0
K41-14	2012-07-18	KU5	7	5	Green	Alate	1	1	0	0	0	0	0		1	0	0	0	0	0	0	0	0	0	0	0	0	0	0	0	0	0	0	0	0	2	0	0	0	0	0	0	0	0
K41-15	2012-07-18	KU5	7	5	Green	Alate	1	0	0	1	0	0	0		0	0	1	0	0	0	0	0	0	0	0	0	0	0	0	0	0	0	0	0	0	2	0	0	0	0	0	0	0	0
K41-16	2012-07-18	KU5	7	5	Green	Alate	0	1	0	0	0	0	0	13 bp	0	0	0	0	0	0	0	0	0	0	0	0	0	0	0	0	0	0	0	0	0	1	0	0	1	0	0	0	0	0
K41-17	2012-07-18	KU5	7	5	Green	Alate	1	0	0	0	0	0	0		0	0	0	0	0	0	0	0	0	0	0	0	0	0	0	0	0	0	0	0	0	1	0	1	0	0	0	0	0	0
K41-18	2012-07-18	KU5	7	5	Green	Alate	1	0	0	0	0	0	0		0	0	0	0	0	0	0	0	0	0	0	0	0	0	0	0	0	0	0	0	0	1	0	1	0	0	0	0	0	0
K41-19	2012-07-18	KU5	7	5	Green	Alate	1	0	0	0	0	0	0		0	0	0	0	0	0	0	0	0	0	0	0	0	0	0	0	0	0	0	0	0	1	0	1	0	0	0	0	0	0
K41-2	2012-07-18	KU5	7	5	Red	Alate	1	0	0	0	0	0	0	13 bp	0	0	0	0	0	0	0	0	0	0	0	0	0	0	0	0	0	0	0	0	0	1	0	1	0	0	0	0	0	0
K41-20	2012-07-18	KU5	7	5	Green	Alate	0	0	0	0	0	0	0		0	0	0	0	0	0	0	0	0	0	0	0	0	0	0	0	0	0	0	0	0	0	1	0	0	0	0	0	0	0
K41-21	2012-07-18	KU5	7	5	Green	Alate	1	0	0	0	0	0	0		0	0	0	0	0	0	0	0	0	0	0	0	0	0	0	0	0	0	0	0	0	1	0	1	0	0	0	0	0	0
K41-22	2012-07-18	KU5	7	5	Green	Alate	1	0	1	0	0	1	0		0	1	0	0	1	0	0	0	0	0	0	0	0	1	0	0	0	0	0	0	0	3	0	0	0	0	0	0	0	0
K41-23	2012-07-18	KU5	7	5	Green	Alate	1	1	0	0	0	0	0		1	0	0	0	0	0	0	0	0	0	0	0	0	0	0	0	0	0	0	0	0	2	0	0	0	0	0	0	0	0
K41-3	2012-07-18	KU5	7	5	Red	Alate	0	0	0	0	0	0	0		0	0	0	0	0	0	0	0	0	0	0	0	0	0	0	0	0	0	0	0	0	0	1	0	0	0	0	0	0	0
K41-4	2012-07-18	KU5	7	5	Red	Alate	1	0	0	0	0	0	0		0	0	0	0	0	0	0	0	0	0	0	0	0	0	0	0	0	0	0	0	0	1	0	1	0	0	0	0	0	0
K41-5	2012-07-18	KU5	7	5	Red	Alate	1	0	0	0	0	0	0	13 bp	0	0	0	0	0	0	0	0	0	0	0	0	0	0	0	0	0	0	0	0	0	1	0	1	0	0	0	0	0	0
K41-7	2012-07-18	KU5	7	5	Green	Alate	1	0	0	0	0	0	0	13 bp	0	0	0	0	0	0	0	0	0	0	0	0	0	0	0	0	0	0	0	0	0	1	0	1	0	0	0	0	0	0
K41-8	2012-07-18	KU5	7	5	Green	Alate	1	0	0	0	0	0	0		0	0	0	0	0	0	0	0	0	0	0	0	0	0	0	0	0	0	0	0	0	1	0	1	0	0	0	0	0	0
K41-9	2012-07-18	KU5	7	5	Green	Alate	0	0	0	0	0	0	0	13 bp	0	0	0	0	0	0	0	0	0	0	0	0	0	0	0	0	0	0	0	0	0	0	1	0	0	0	0	0	0	0
K41-24	2012-07-18	KU5	7	5	Green	Alate	1	0	0	0	0	0	0	13 bp	0	0	0	0	0	0	0	0	0	0	0	0	0	0	0	0	0	0	0	0	0	1	0	1	0	0	0	0	0	0
K42-1	2012-07-18	KU6	7	5	Green	Alate	1	1	0	0	0	0	0		1	0	0	0	0	0	0	0	0	0	0	0	0	0	0	0	0	0	0	0	0	2	0	0	0	0	0	0	0	0
K42-10	2012-07-18	KU6	7	5	Green	Alate	1	0	0	0	0	0	0		0	0	0	0	0	0	0	0	0	0	0	0	0	0	0	0	0	0	0	0	0	1	0	1	0	0	0	0	0	0
K42-11	2012-07-18	KU6	7	5	Green	Alate	0	1	0	0	0	0	0	13 bp	0	0	0	0	0	0	0	0	0	0	0	0	0	0	0	0	0	0	0	0	0	1	0	0	1	0	0	0	0	0
K42-12	2012-07-18	KU6	7	2	Green	Apterous	0	0	0	0	0	0	0		0	0	0	0	0	0	0	0	0	0	0	0	0	0	0	0	0	0	0	0	0	0	1	0	0	0	0	0	0	0
K42-14	2012-07-18	KU6	7	5	Green	Alate	1	1	0	0	0	0	1		1	0	0	0	0	1	0	0	0	0	1	0	0	0	0	0	0	0	0	0	0	3	0	0	0	0	0	0	0	0
K42-19	2012-07-18	KU6	7	5	Green	Alate	1	0	0	0	1	0	0		0	0	0	1	0	0	0	0	0	0	0	0	0	0	0	0	0	0	0	0	0	2	0	0	0	0	0	0	0	0
K42-2	2012-07-18	KU6	7	5	Green	Alate	1	0	0	1	1	0	0	13 bp	0	0	1	1	0	0	0	0	0	0	0	0	0	0	0	1	0	0	0	0	0	3	0	0	0	0	0	0	0	0
K42-20	2012-07-18	KU6	7	5	Green	Alate	0	1	0	0	0	0	0	13 bp	0	0	0	0	0	0	0	0	0	0	0	0	0	0	0	0	0	0	0	0	0	1	0	0	1	0	0	0	0	0
K42-21	2012-07-18	KU6	7	3	Green	Apterous	1	1	0	0	0	0	0		1	0	0	0	0	0	0	0	0	0	0	0	0	0	0	0	0	0	0	0	0	2	0	0	0	0	0	0	0	0
K42-22	2012-07-18	KU6	7	5	Green	Alate	1	0	0	0	0	0	1		0	0	0	0	0	1	0	0	0	0	0	0	0	0	0	0	0	0	0	0	0	2	0	0	0	0	0	0	0	0
K42-23	2012-07-18	KU6	7	5	Green	Alate	1	0	0	1	0	0	0	13 bp	0	0	1	0	0	0	0	0	0	0	0	0	0	0	0	0	0	0	0	0	0	2	0	0	0	0	0	0	0	0
K42-24	2012-07-18	KU6	7	5	Green	Alate	1	0	0	1	0	0	0		0	0	1	0	0	0	0	0	0	0	0	0	0	0	0	0	0	0	0	0	0	2	0	0	0	0	0	0	0	0
K42-3	2012-07-18	KU6	7	3	Green	Apterous	0	0	0	0	0	0	1		0	0	0	0	0	0	0	0	0	0	0	0	0	0	0	0	0	0	0	0	0	1	0	0	0	0	0	0	0	1
K42-4	2012-07-18	KU6	7	5	Green	Alate	0	0	0	0	0	0	1		0	0	0	0	0	0	0	0	0	0	0	0	0	0	0	0	0	0	0	0	0	1	0	0	0	0	0	0	0	1
K42-5	2012-07-18	KU6	7	5	Green	Alate	0	0	0	1	0	0	0		0	0	0	0	0	0	0	0	0	0	0	0	0	0	0	0	0	0	0	0	0	1	0	0	0	0	1	0	0	0
K42-7	2012-07-18	KU6	7	4	Green	Apterous	0	0	0	0	0	0	1		0	0	0	0	0	0	0	0	0	0	0	0	0	0	0	0	0	0	0	0	0	1	0	0	0	0	0	0	0	1
K42-8	2012-07-18	KU6	7	3	Green	Apterous	1	0	0	1	0	0	0		0	0	1	0	0	0	0	0	0	0	0	0	0	0	0	0	0	0	0	0	0	2	0	0	0	0	0	0	0	0
K42-13	2012-07-18	KU6	7	5	Green	Alate	1	0	0	0	0	0	0	13 bp	0	0	0	0	0	0	0	0	0	0	0	0	0	0	0	0	0	0	0	0	0	1	0	1	0	0	0	0	0	0
K42-15	2012-07-18	KU6	7	5	Green	Alate	0	0	0	0	0	0	0		0	0	0	0	0	0	0	0	0	0	0	0	0	0	0	0	0	0	0	0	0	0	1	0	0	0	0	0	0	0
K42-18	2012-07-18	KU6	7	5	Green	Alate	1	0	0	0	0	0	0		0	0	0	0	0	0	0	0	0	0	0	0	0	0	0	0	0	0	0	0	0	1	0	1	0	0	0	0	0	0
K42-6	2012-07-18	KU6	7	5	Green	Alate	0	0	0	0	0	0	0		0	0	0	0	0	0	0	0	0	0	0	0	0	0	0	0	0	0	0	0	0	0	1	0	0	0	0	0	0	0
K42-9	2012-07-18	KU6	7	5	Green	Alate	1	0	0	0	0	0	0	13 bp	0	0	0	0	0	0	0	0	0	0	0	0	0	0	0	0	0	0	0	0	0	1	0	1	0	0	0	0	0	0
K42-17	2012-07-18	KU6	7	5	Green	Alate	1	0	0	0	1	1	0		0	0	0	1	1	0	0	0	0	0	0	0	0	0	0	0	0	0	1	0	0	3	0	0	0	0	0	0	0	0
K43-1	2012-08-01	KU1	8	5	Red	Apterous	0	0	0	0	0	0	1		0	0	0	0	0	0	0	0	0	0	0	0	0	0	0	0	0	0	0	0	0	1	0	0	0	0	0	0	0	1
K43-11	2012-08-01	KU1	8	5	Red	Alate	0	1	0	0	0	0	0		0	0	0	0	0	0	0	0	0	0	0	0	0	0	0	0	0	0	0	0	0	1	0	0	1	0	0	0	0	0
K43-15	2012-08-01	KU1	8	4	Green	Apterous	0	0	0	0	0	0	0		0	0	0	0	0	0	0	0	0	0	0	0	0	0	0	0	0	0	0	0	0	0	1	0	0	0	0	0	0	0
K43-16	2012-08-01	KU1	8	4	Green	Apterous	1	0	0	0	0	0	0		0	0	0	0	0	0	0	0	0	0	0	0	0	0	0	0	0	0	0	0	0	1	0	1	0	0	0	0	0	0
K43-17	2012-08-01	KU1	8	3	Green	Apterous	0	0	0	0	0	0	0		0	0	0	0	0	0	0	0	0	0	0	0	0	0	0	0	0	0	0	0	0	0	1	0	0	0	0	0	0	0
K43-18	2012-08-01	KU1	8	3	Green	Apterous	1	0	0	1	0	0	0		0	0	1	0	0	0	0	0	0	0	0	0	0	0	0	0	0	0	0	0	0	2	0	0	0	0	0	0	0	0
K43-19	2012-08-01	KU1	8	3	Green	Apterous	1	1	0	0	0	0	0		1	0	0	0	0	0	0	0	0	0	0	0	0	0	0	0	0	0	0	0	0	2	0	0	0	0	0	0	0	0
K43-2	2012-08-01	KU1	8	5	Red	Apterous	1	0	0	1	0	0	0		0	0	1	0	0	0	0	0	0	0	0	0	0	0	0	0	0	0	0	0	0	2	0	0	0	0	0	0	0	0
K43-20	2012-08-01	KU1	8	3	Green	Apterous	0	0	1	0	1	1	0		0	0	0	0	0	0	0	0	0	0	0	0	1	1	0	0	0	0	1	0	0	3	0	0	0	0	0	0	0	0
K43-23	2012-08-01	KU1	8	3	Green	Apterous	0	0	0	0	0	0	1		0	0	0	0	0	0	0	0	0	0	0	0	0	0	0	0	0	0	0	0	0	1	0	0	0	0	0	0	0	1
K43-4	2012-08-01	KU1	8	5	Red	Apterous	1	0	0	1	0	0	0		0	0	1	0	0	0	0	0	0	0	0	0	0	0	0	0	0	0	0	0	0	2	0	0	0	0	0	0	0	0
K43-10	2012-08-01	KU1	8	4	Red	Apterous	0	1	0	0	0	0	0		0	0	0	0	0	0	0	0	0	0	0	0	0	0	0	0	0	0	0	0	0	1	0	0	1	0	0	0	0	0
K43-13	2012-08-01	KU1	8	5	Green	Apterous	1	0	0	0	0	0	0		0	0	0	0	0	0	0	0	0	0	0	0	0	0	0	0	0	0	0	0	0	1	0	1	0	0	0	0	0	0
K43-24	2012-08-01	KU1	8	3	Green	Apterous	1	0	0	1	0	0	0		0	0	1	0	0	0	0	0	0	0	0	0	0	0	0	0	0	0	0	0	0	2	0	0	0	0	0	0	0	0
K43-5	2012-08-01	KU1	8	5	Red	Apterous	1	0	0	0	0	0	0		0	0	0	0	0	0	0	0	0	0	0	0	0	0	0	0	0	0	0	0	0	1	0	1	0	0	0	0	0	0
K43-8	2012-08-01	KU1	8	3	Red	Apterous	0	0	0	0	0	0	0		0	0	0	0	0	0	0	0	0	0	0	0	0	0	0	0	0	0	0	0	0	0	1	0	0	0	0	0	0	0
K43-12	2012-08-01	KU1	8	4	Red	Apterous	1	1	0	0	0	0	0		1	0	0	0	0	0	0	0	0	0	0	0	0	0	0	0	0	0	0	0	0	2	0	0	0	0	0	0	0	0
K43-14	2012-08-01	KU1	8	4	Green	Apterous	0	0	1	0	0	1	0		0	0	0	0	0	0	0	0	0	0	0	0	0	1	0	0	0	0	0	0	0	2	0	0	0	0	0	0	0	0
K43-22	2012-08-01	KU1	8	3	Green	Apterous	1	0	0	0	0	0	0		0	0	0	0	0	0	0	0	0	0	0	0	0	0	0	0	0	0	0	0	0	1	0	1	0	0	0	0	0	0
K43-9	2012-08-01	KU1	8	3	Red	Apterous	0	0	0	0	0	0	0		0	0	0	0	0	0	0	0	0	0	0	0	0	0	0	0	0	0	0	0	0	0	1	0	0	0	0	0	0	0
K43-21	2012-08-01	KU1	8	3	Green	Apterous	1	0	0	0	0	0	0		0	0	0	0	0	0	0	0	0	0	0	0	0	0	0	0	0	0	0	0	0	1	0	1	0	0	0	0	0	0
K43-3	2012-08-01	KU1	8	5	Red	Apterous	0	1	0	0	0	0	1		0	0	0	0	0	0	0	0	0	0	1	0	0	0	0	0	0	0	0	0	0	2	0	0	0	0	0	0	0	0
K43-6	2012-08-01	KU1	8	5	Red	Apterous	0	0	0	0	0	0	1		0	0	0	0	0	0	0	0	0	0	0	0	0	0	0	0	0	0	0	0	0	1	0	0	0	0	0	0	0	1
K43-7	2012-08-01	KU1	8	4	Red	Apterous	0	0	0	0	0	0	0		0	0	0	0	0	0	0	0	0	0	0	0	0	0	0	0	0	0	0	0	0	0	1	0	0	0	0	0	0	0
K44-10	2012-08-01	KU2	8	5	Red	Apterous	0	0	0	0	0	0	0		0	0	0	0	0	0	0	0	0	0	0	0	0	0	0	0	0	0	0	0	0	0	1	0	0	0	0	0	0	0
K44-11	2012-08-01	KU2	8	5	Red	Apterous	0	0	0	1	0	0	0		0	0	0	0	0	0	0	0	0	0	0	0	0	0	0	0	0	0	0	0	0	1	0	0	0	0	1	0	0	0
K44-12	2012-08-01	KU2	8	5	Red	Apterous	0	0	1	0	0	0	0		0	0	0	0	0	0	0	0	0	0	0	0	0	0	0	0	0	0	0	0	0	1	0	0	0	1	0	0	0	0
K44-13	2012-08-01	KU2	8	5	Red	Apterous	1	0	0	0	0	0	0		0	0	0	0	0	0	0	0	0	0	0	0	0	0	0	0	0	0	0	0	0	1	0	1	0	0	0	0	0	0
K44-14	2012-08-01	KU2	8	5	Red	Apterous	1	0	0	1	0	1	0		0	0	1	0	1	0	0	0	0	0	0	0	0	0	0	0	1	0	0	0	0	3	0	0	0	0	0	0	0	0
K44-16	2012-08-01	KU2	8	5	Red	Apterous	1	0	1	0	0	1	0		0	1	0	0	1	0	0	0	0	0	0	0	0	1	0	0	0	0	0	0	0	3	0	0	0	0	0	0	0	0
K44-17	2012-08-01	KU2	8	5	Red	Apterous	1	0	0	0	0	0	0		0	0	0	0	0	0	0	0	0	0	0	0	0	0	0	0	0	0	0	0	0	1	0	1	0	0	0	0	0	0
K44-18	2012-08-01	KU2	8	5	Red	Apterous	1	0	0	0	0	0	0		0	0	0	0	0	0	0	0	0	0	0	0	0	0	0	0	0	0	0	0	0	1	0	1	0	0	0	0	0	0
K44-19	2012-08-01	KU2	8	5	Red	Apterous	0	0	0	0	0	0	0		0	0	0	0	0	0	0	0	0	0	0	0	0	0	0	0	0	0	0	0	0	0	1	0	0	0	0	0	0	0
K44-2	2012-08-01	KU2	8	5	Green	Apterous	0	0	0	1	0	0	0		0	0	0	0	0	0	0	0	0	0	0	0	0	0	0	0	0	0	0	0	0	1	0	0	0	0	1	0	0	0
K44-20	2012-08-01	KU2	8	5	Red	Apterous	1	0	1	0	0	0	0		0	1	0	0	0	0	0	0	0	0	0	0	0	0	0	0	0	0	0	0	0	2	0	0	0	0	0	0	0	0
K44-21	2012-08-01	KU2	8	5	Red	Apterous	1	0	1	0	0	1	0		0	1	0	0	1	0	0	0	0	0	0	0	0	1	0	0	0	0	0	0	0	3	0	0	0	0	0	0	0	0
K44-22	2012-08-01	KU2	8	5	Red	Apterous	1	0	0	0	0	0	1		0	0	0	0	0	1	0	0	0	0	0	0	0	0	0	0	0	0	0	0	0	2	0	0	0	0	0	0	0	0
K44-23	2012-08-01	KU2	8	5	Red	Apterous	0	0	0	0	0	1	0		0	0	0	0	0	0	0	0	0	0	0	0	0	0	0	0	0	0	0	0	0	1	0	0	0	0	0	0	1	0
K44-24	2012-08-01	KU2	8	5	Red	Apterous	1	0	0	0	0	1	0		0	0	0	0	1	0	0	0	0	0	0	0	0	0	0	0	0	0	0	0	0	2	0	0	0	0	0	0	0	0
K44-3	2012-08-01	KU2	8	5	Green	Apterous	1	0	0	0	0	0	0		0	0	0	0	0	0	0	0	0	0	0	0	0	0	0	0	0	0	0	0	0	1	0	1	0	0	0	0	0	0
K44-4	2012-08-01	KU2	8	5	Green	Apterous	1	0	0	0	0	1	0		0	0	0	0	1	0	0	0	0	0	0	0	0	0	0	0	0	0	0	0	0	2	0	0	0	0	0	0	0	0
K44-6	2012-08-01	KU2	8	5	Green	Apterous	1	0	0	0	0	0	0		0	0	0	0	0	0	0	0	0	0	0	0	0	0	0	0	0	0	0	0	0	1	0	1	0	0	0	0	0	0
K44-7	2012-08-01	KU2	8	5	Green	Apterous	1	1	0	0	0	0	0		1	0	0	0	0	0	0	0	0	0	0	0	0	0	0	0	0	0	0	0	0	2	0	0	0	0	0	0	0	0
K44-9	2012-08-01	KU2	8	5	Red	Apterous	1	0	0	0	0	0	0		0	0	0	0	0	0	0	0	0	0	0	0	0	0	0	0	0	0	0	0	0	1	0	1	0	0	0	0	0	0
K44-1	2012-08-01	KU2	8	5	Green	Apterous	1	0	0	1	0	0	0		0	0	1	0	0	0	0	0	0	0	0	0	0	0	0	0	0	0	0	0	0	2	0	0	0	0	0	0	0	0
K44-15	2012-08-01	KU2	8	5	Red	Apterous	1	0	1	0	0	0	1		0	1	0	0	0	1	0	0	0	0	0	0	0	0	1	0	0	0	0	0	0	3	0	0	0	0	0	0	0	0
K44-5	2012-08-01	KU2	8	5	Green	Apterous	1	0	0	1	0	0	0		0	0	1	0	0	0	0	0	0	0	0	0	0	0	0	0	0	0	0	0	0	2	0	0	0	0	0	0	0	0
K44-8	2012-08-01	KU2	8	5	Green	Apterous	1	0	0	0	0	0	0		0	0	0	0	0	0	0	0	0	0	0	0	0	0	0	0	0	0	0	0	0	1	0	1	0	0	0	0	0	0
K45-10	2012-08-01	KU3	8	3	Green	Apterous	1	0	0	0	0	0	0		0	0	0	0	0	0	0	0	0	0	0	0	0	0	0	0	0	0	0	0	0	1	0	1	0	0	0	0	0	0
K45-12	2012-08-01	KU3	8	3	Green	Apterous	1	0	1	0	0	1	0		0	1	0	0	1	0	0	0	0	0	0	0	0	1	0	0	0	0	0	0	0	3	0	0	0	0	0	0	0	0
K45-14	2012-08-01	KU3	8	5	Red	Apterous	1	0	0	0	0	0	0		0	0	0	0	0	0	0	0	0	0	0	0	0	0	0	0	0	0	0	0	0	1	0	1	0	0	0	0	0	0
K45-15	2012-08-01	KU3	8	5	Red	Apterous	1	0	0	0	0	0	0		0	0	0	0	0	0	0	0	0	0	0	0	0	0	0	0	0	0	0	0	0	1	0	1	0	0	0	0	0	0
K45-17	2012-08-01	KU3	8	2	Red	Apterous	0	0	0	0	0	0	1		0	0	0	0	0	0	0	0	0	0	0	0	0	0	0	0	0	0	0	0	0	1	0	0	0	0	0	0	0	1
K45-18	2012-08-01	KU3	8	3	Red	Apterous	0	0	0	1	0	0	0		0	0	0	0	0	0	0	0	0	0	0	0	0	0	0	0	0	0	0	0	0	1	0	0	0	0	1	0	0	0
K45-19	2012-08-01	KU3	8	4	Red	Apterous	1	0	0	1	0	0	0		0	0	1	0	0	0	0	0	0	0	0	0	0	0	0	0	0	0	0	0	0	2	0	0	0	0	0	0	0	0
K45-2	2012-08-01	KU3	8	5	Green	Apterous	0	1	0	0	0	0	0		0	0	0	0	0	0	0	0	0	0	0	0	0	0	0	0	0	0	0	0	0	1	0	0	1	0	0	0	0	0
K45-20	2012-08-01	KU3	8	4	Red	Apterous	1	0	1	0	0	0	0		0	1	0	0	0	0	0	0	0	0	0	0	0	0	0	0	0	0	0	0	0	2	0	0	0	0	0	0	0	0
K45-21	2012-08-01	KU3	8	5	Red	Apterous	0	0	1	0	0	0	0		0	0	0	0	0	0	0	0	0	0	0	0	0	0	0	0	0	0	0	0	0	1	0	0	0	1	0	0	0	0
K45-22	2012-08-01	KU3	8	5	Red	Apterous	0	0	0	0	0	0	1		0	0	0	0	0	0	0	0	0	0	0	0	0	0	0	0	0	0	0	0	0	1	0	0	0	0	0	0	0	1
K45-23	2012-08-01	KU3	8	4	Red	Apterous	1	0	0	0	0	0	0		0	0	0	0	0	0	0	0	0	0	0	0	0	0	0	0	0	0	0	0	0	1	0	1	0	0	0	0	0	0
K45-3	2012-08-01	KU3	8	5	Green	Apterous	1	0	0	0	0	0	0		0	0	0	0	0	0	0	0	0	0	0	0	0	0	0	0	0	0	0	0	0	1	0	1	0	0	0	0	0	0
K45-4	2012-08-01	KU3	8	5	Green	Apterous	0	1	0	0	0	0	0		0	0	0	0	0	0	0	0	0	0	0	0	0	0	0	0	0	0	0	0	0	1	0	0	1	0	0	0	0	0
K45-7	2012-08-01	KU3	8	4	Green	Apterous	0	1	0	0	0	0	0		0	0	0	0	0	0	0	0	0	0	0	0	0	0	0	0	0	0	0	0	0	1	0	0	1	0	0	0	0	0
K45-8	2012-08-01	KU3	8	3	Green	Apterous	0	1	1	0	0	1	0		0	0	0	0	0	0	1	0	0	1	0	0	0	1	0	0	0	0	0	0	0	3	0	0	0	0	0	0	0	0
K45-9	2012-08-01	KU3	8	4	Green	Apterous	0	0	0	0	0	0	0		0	0	0	0	0	0	0	0	0	0	0	0	0	0	0	0	0	0	0	0	0	0	1	0	0	0	0	0	0	0
K45-1	2012-08-01	KU3	8	5	Green	Apterous	0	1	0	0	0	0	0		0	0	0	0	0	0	0	0	0	0	0	0	0	0	0	0	0	0	0	0	0	1	0	0	1	0	0	0	0	0
K45-11	2012-08-01	KU3	8	3	Green	Apterous	1	1	0	0	0	0	0		1	0	0	0	0	0	0	0	0	0	0	0	0	0	0	0	0	0	0	0	0	2	0	0	0	0	0	0	0	0
K45-16	2012-08-01	KU3	8	3	Red	Apterous	1	0	0	0	0	0	1		0	0	0	0	0	1	0	0	0	0	0	0	0	0	0	0	0	0	0	0	0	2	0	0	0	0	0	0	0	0
K45-24	2012-08-01	KU3	8	4	Red	Apterous	1	0	0	1	0	0	0		0	0	1	0	0	0	0	0	0	0	0	0	0	0	0	0	0	0	0	0	0	2	0	0	0	0	0	0	0	0
K45-13	2012-08-01	KU3	8	5	Red	Apterous	1	0	0	0	0	0	0		0	0	0	0	0	0	0	0	0	0	0	0	0	0	0	0	0	0	0	0	0	1	0	1	0	0	0	0	0	0
K45-5	2012-08-01	KU3	8	5	Green	Apterous	0	1	0	0	0	0	0		0	0	0	0	0	0	0	0	0	0	0	0	0	0	0	0	0	0	0	0	0	1	0	0	1	0	0	0	0	0
K45-6	2012-08-01	KU3	8	4	Green	Apterous	0	0	0	0	0	0	0		0	0	0	0	0	0	0	0	0	0	0	0	0	0	0	0	0	0	0	0	0	0	1	0	0	0	0	0	0	0
K49-1	2012-08-15	KU1	9	3	Red	Apterous	1	0	0	0	0	0	0		0	0	0	0	0	0	0	0	0	0	0	0	0	0	0	0	0	0	0	0	0	1	0	1	0	0	0	0	0	0
K49-10	2012-08-15	KU1	9	3	Red	Apterous	1	0	0	0	0	0	0		0	0	0	0	0	0	0	0	0	0	0	0	0	0	0	0	0	0	0	0	0	1	0	1	0	0	0	0	0	0
K49-11	2012-08-15	KU1	9	2	Red	Apterous	1	0	0	0	1	0	0		0	0	0	1	0	0	0	0	0	0	0	0	0	0	0	0	0	0	0	0	0	2	0	0	0	0	0	0	0	0
K49-12	2012-08-15	KU1	9	2	Red	Apterous	0	0	0	0	0	0	0		0	0	0	0	0	0	0	0	0	0	0	0	0	0	0	0	0	0	0	0	0	0	1	0	0	0	0	0	0	0
K49-13	2012-08-15	KU1	9	5	Green	Apterous	0	0	0	0	0	0	0		0	0	0	0	0	0	0	0	0	0	0	0	0	0	0	0	0	0	0	0	0	0	1	0	0	0	0	0	0	0
K49-14	2012-08-15	KU1	9	5	Green	Alate	1	0	0	0	0	0	0		0	0	0	0	0	0	0	0	0	0	0	0	0	0	0	0	0	0	0	0	0	1	0	1	0	0	0	0	0	0
K49-15	2012-08-15	KU1	9	4	Green	Apterous	0	1	0	0	0	0	0		0	0	0	0	0	0	0	0	0	0	0	0	0	0	0	0	0	0	0	0	0	1	0	0	1	0	0	0	0	0
K49-18	2012-08-15	KU1	9	3	Green	Apterous	1	0	0	0	0	0	0		0	0	0	0	0	0	0	0	0	0	0	0	0	0	0	0	0	0	0	0	0	1	0	1	0	0	0	0	0	0
K49-19	2012-08-15	KU1	9	3	Green	Apterous	0	0	0	0	0	0	0		0	0	0	0	0	0	0	0	0	0	0	0	0	0	0	0	0	0	0	0	0	0	1	0	0	0	0	0	0	0
K49-2	2012-08-15	KU1	9	3	Red	Apterous	1	1	0	1	0	0	0		1	0	1	0	0	0	0	1	0	0	0	0	0	0	0	0	0	0	0	0	0	3	0	0	0	0	0	0	0	0
K49-20	2012-08-15	KU1	9	2	Green	Apterous	1	0	0	0	0	0	0		0	0	0	0	0	0	0	0	0	0	0	0	0	0	0	0	0	0	0	0	0	1	0	1	0	0	0	0	0	0
K49-21	2012-08-15	KU1	9	2	Green	Apterous	0	1	0	0	0	0	0		0	0	0	0	0	0	0	0	0	0	0	0	0	0	0	0	0	0	0	0	0	1	0	0	1	0	0	0	0	0
K49-22	2012-08-15	KU1	9	2	Green	Apterous	0	0	0	0	0	1	0		0	0	0	0	0	0	0	0	0	0	0	0	0	0	0	0	0	0	0	0	0	1	0	0	0	0	0	0	1	0
K49-24	2012-08-15	KU1	9	2	Green	Apterous	1	0	0	0	0	0	0		0	0	0	0	0	0	0	0	0	0	0	0	0	0	0	0	0	0	0	0	0	1	0	1	0	0	0	0	0	0
K49-3	2012-08-15	KU1	9	3	Red	Apterous	1	0	0	0	0	0	0		0	0	0	0	0	0	0	0	0	0	0	0	0	0	0	0	0	0	0	0	0	1	0	1	0	0	0	0	0	0
K49-4	2012-08-15	KU1	9	4	Red	Apterous	1	0	0	1	0	0	0		0	0	1	0	0	0	0	0	0	0	0	0	0	0	0	0	0	0	0	0	0	2	0	0	0	0	0	0	0	0
K49-5	2012-08-15	KU1	9	4	Red	Apterous	0	0	0	0	0	0	0		0	0	0	0	0	0	0	0	0	0	0	0	0	0	0	0	0	0	0	0	0	0	1	0	0	0	0	0	0	0
K49-8	2012-08-15	KU1	9	2	Red	Apterous	1	0	0	0	1	0	0		0	0	0	1	0	0	0	0	0	0	0	0	0	0	0	0	0	0	0	0	0	2	0	0	0	0	0	0	0	0
K49-9	2012-08-15	KU1	9	3	Red	Apterous	1	0	0	0	0	0	0		0	0	0	0	0	0	0	0	0	0	0	0	0	0	0	0	0	0	0	0	0	1	0	1	0	0	0	0	0	0
K49-16	2012-08-15	KU1	9	4	Green	Apterous	1	0	0	0	0	0	0		0	0	0	0	0	0	0	0	0	0	0	0	0	0	0	0	0	0	0	0	0	1	0	1	0	0	0	0	0	0
K49-17	2012-08-15	KU1	9	3	Green	Apterous	1	0	0	0	0	0	0		0	0	0	0	0	0	0	0	0	0	0	0	0	0	0	0	0	0	0	0	0	1	0	1	0	0	0	0	0	0
K49-23	2012-08-15	KU1	9	2	Green	Apterous	1	0	0	1	0	0	0		0	0	1	0	0	0	0	0	0	0	0	0	0	0	0	0	0	0	0	0	0	2	0	0	0	0	0	0	0	0
K49-6	2012-08-15	KU1	9	4	Red	Apterous	1	0	0	0	1	0	0		0	0	0	1	0	0	0	0	0	0	0	0	0	0	0	0	0	0	0	0	0	2	0	0	0	0	0	0	0	0
K49-7	2012-08-15	KU1	9	2	Red	Apterous	1	0	0	0	0	0	0		0	0	0	0	0	0	0	0	0	0	0	0	0	0	0	0	0	0	0	0	0	1	0	1	0	0	0	0	0	0
K50-1	2012-08-15	KU2	9	2	Red	Apterous	0	0	0	0	0	0	0		0	0	0	0	0	0	0	0	0	0	0	0	0	0	0	0	0	0	0	0	0	0	1	0	0	0	0	0	0	0
K50-2	2012-08-15	KU2	9	2	Red	Apterous	0	0	0	0	0	0	0		0	0	0	0	0	0	0	0	0	0	0	0	0	0	0	0	0	0	0	0	0	0	1	0	0	0	0	0	0	0
K51-1	2012-08-15	KU3	9	5	Red	Alate	0	0	0	0	1	0	0		0	0	0	0	0	0	0	0	0	0	0	0	0	0	0	0	0	0	0	0	0	1	0	0	0	0	0	1	0	0
K51-2	2012-08-15	KU3	9	4	Red	Apterous	1	0	0	0	0	0	0		0	0	0	0	0	0	0	0	0	0	0	0	0	0	0	0	0	0	0	0	0	1	0	1	0	0	0	0	0	0
K51-3	2012-08-15	KU3	9	2	Red	Apterous	1	0	0	0	0	0	0		0	0	0	0	0	0	0	0	0	0	0	0	0	0	0	0	0	0	0	0	0	1	0	1	0	0	0	0	0	0
K51-4	2012-08-15	KU3	9	2	Red	Apterous	1	0	0	1	0	0	0		0	0	1	0	0	0	0	0	0	0	0	0	0	0	0	0	0	0	0	0	0	2	0	0	0	0	0	0	0	0
K51-6	2012-08-15	KU3	9	5	Green	Alate	0	0	0	0	0	0	1		0	0	0	0	0	0	0	0	0	0	0	0	0	0	0	0	0	0	0	0	0	1	0	0	0	0	0	0	0	1
K51-7	2012-08-15	KU3	9	5	Green	Alate	0	0	0	1	0	0	0		0	0	0	0	0	0	0	0	0	0	0	0	0	0	0	0	0	0	0	0	0	1	0	0	0	0	1	0	0	0
K51-5	2012-08-15	KU3	9	2	Red	Apterous	1	0	0	0	0	0	0		0	0	0	0	0	0	0	0	0	0	0	0	0	0	0	0	0	0	0	0	0	1	0	1	0	0	0	0	0	0
K52-1	2012-08-15	KU4	9	5	Red	Apterous	1	0	0	0	0	0	0		0	0	0	0	0	0	0	0	0	0	0	0	0	0	0	0	0	0	0	0	0	1	0	1	0	0	0	0	0	0
K52-10	2012-08-15	KU4	9	2	Green	Apterous	0	0	0	0	0	0	0		0	0	0	0	0	0	0	0	0	0	0	0	0	0	0	0	0	0	0	0	0	0	1	0	0	0	0	0	0	0
K52-11	2012-08-15	KU4	9	3	Green	Apterous	1	0	0	1	0	0	0		0	0	1	0	0	0	0	0	0	0	0	0	0	0	0	0	0	0	0	0	0	2	0	0	0	0	0	0	0	0
K52-12	2012-08-15	KU4	9	3	Green	Apterous	0	0	0	0	0	0	0		0	0	0	0	0	0	0	0	0	0	0	0	0	0	0	0	0	0	0	0	0	0	1	0	0	0	0	0	0	0
K52-13	2012-08-15	KU4	9	3	Green	Apterous	1	1	0	0	0	0	0		1	0	0	0	0	0	0	0	0	0	0	0	0	0	0	0	0	0	0	0	0	2	0	0	0	0	0	0	0	0
K52-14	2012-08-15	KU4	9	2	Green	Apterous	0	0	0	0	0	0	0		0	0	0	0	0	0	0	0	0	0	0	0	0	0	0	0	0	0	0	0	0	0	1	0	0	0	0	0	0	0
K52-15	2012-08-15	KU4	9	2	Green	Apterous	1	0	0	1	0	0	0		0	0	1	0	0	0	0	0	0	0	0	0	0	0	0	0	0	0	0	0	0	2	0	0	0	0	0	0	0	0
K52-16	2012-08-15	KU4	9	2	Green	Apterous	0	0	0	0	0	1	0		0	0	0	0	0	0	0	0	0	0	0	0	0	0	0	0	0	0	0	0	0	1	0	0	0	0	0	0	1	0
K52-17	2012-08-15	KU4	9	2	Green	Apterous	0	0	1	0	0	1	0		0	0	0	0	0	0	0	0	0	0	0	0	0	1	0	0	0	0	0	0	0	2	0	0	0	0	0	0	0	0
K52-18	2012-08-15	KU4	9	2	Green	Apterous	1	0	0	0	0	0	0		0	0	0	0	0	0	0	0	0	0	0	0	0	0	0	0	0	0	0	0	0	1	0	1	0	0	0	0	0	0
K52-2	2012-08-15	KU4	9	4	Red	Apterous	0	0	0	1	0	0	0		0	0	0	0	0	0	0	0	0	0	0	0	0	0	0	0	0	0	0	0	0	1	0	0	0	0	1	0	0	0
K52-3	2012-08-15	KU4	9	2	Red	Apterous	1	0	0	1	0	0	0		0	0	1	0	0	0	0	0	0	0	0	0	0	0	0	0	0	0	0	0	0	2	0	0	0	0	0	0	0	0
K52-4	2012-08-15	KU4	9	3	Red	Apterous	1	1	0	1	0	0	0		1	0	1	0	0	0	0	1	0	0	0	0	0	0	0	0	0	0	0	0	0	3	0	0	0	0	0	0	0	0
K52-5	2012-08-15	KU4	9	4	Red	Apterous	1	0	1	0	0	1	0		0	1	0	0	1	0	0	0	0	0	0	0	0	1	0	0	0	0	0	0	0	3	0	0	0	0	0	0	0	0
K52-7	2012-08-15	KU4	9	5	Green	Alate	1	1	0	0	0	0	0		1	0	0	0	0	0	0	0	0	0	0	0	0	0	0	0	0	0	0	0	0	2	0	0	0	0	0	0	0	0
K52-8	2012-08-15	KU4	9	3	Green	Apterous	0	0	0	0	0	0	0		0	0	0	0	0	0	0	0	0	0	0	0	0	0	0	0	0	0	0	0	0	0	1	0	0	0	0	0	0	0
K52-9	2012-08-15	KU4	9	4	Green	Apterous	0	1	0	0	0	0	0		0	0	0	0	0	0	0	0	0	0	0	0	0	0	0	0	0	0	0	0	0	1	0	0	1	0	0	0	0	0
K52-6	2012-08-15	KU4	9	4	Green	Apterous	1	0	0	0	0	0	0		0	0	0	0	0	0	0	0	0	0	0	0	0	0	0	0	0	0	0	0	0	1	0	1	0	0	0	0	0	0
K53-1	2012-08-15	KU5	9	4	Red	Apterous	1	0	0	0	0	0	0		0	0	0	0	0	0	0	0	0	0	0	0	0	0	0	0	0	0	0	0	0	1	0	1	0	0	0	0	0	0
K53-10	2012-08-15	KU5	9	5	Green	Apterous	1	1	0	0	0	0	0		1	0	0	0	0	0	0	0	0	0	0	0	0	0	0	0	0	0	0	0	0	2	0	0	0	0	0	0	0	0
K53-11	2012-08-15	KU5	9	5	Green	Apterous	1	0	0	0	0	0	0		0	0	0	0	0	0	0	0	0	0	0	0	0	0	0	0	0	0	0	0	0	1	0	1	0	0	0	0	0	0
K53-12	2012-08-15	KU5	9	2	Green	Apterous	1	0	0	0	0	0	0		0	0	0	0	0	0	0	0	0	0	0	0	0	0	0	0	0	0	0	0	0	1	0	1	0	0	0	0	0	0
K53-13	2012-08-15	KU5	9	3	Green	Apterous	0	0	0	0	0	0	0		0	0	0	0	0	0	0	0	0	0	0	0	0	0	0	0	0	0	0	0	0	0	1	0	0	0	0	0	0	0
K53-14	2012-08-15	KU5	9	2	Green	Apterous	0	0	0	0	0	0	0		0	0	0	0	0	0	0	0	0	0	0	0	0	0	0	0	0	0	0	0	0	0	1	0	0	0	0	0	0	0
K53-15	2012-08-15	KU5	9	2	Green	Apterous	1	0	0	0	0	0	0		0	0	0	0	0	0	0	0	0	0	0	0	0	0	0	0	0	0	0	0	0	1	0	1	0	0	0	0	0	0
K53-17	2012-08-15	KU5	9	2	Green	Apterous	0	1	0	0	0	0	0		0	0	0	0	0	0	0	0	0	0	0	0	0	0	0	0	0	0	0	0	0	1	0	0	1	0	0	0	0	0
K53-18	2012-08-15	KU5	9	2	Green	Apterous	0	0	0	1	0	1	0		0	0	0	0	0	0	0	0	0	0	0	0	0	0	0	0	1	0	0	0	0	2	0	0	0	0	0	0	0	0
K53-2	2012-08-15	KU5	9	2	Red	Apterous	1	0	0	1	0	0	0		0	0	1	0	0	0	0	0	0	0	0	0	0	0	0	0	0	0	0	0	0	2	0	0	0	0	0	0	0	0
K53-3	2012-08-15	KU5	9	2	Red	Apterous	1	0	0	1	0	0	0		0	0	1	0	0	0	0	0	0	0	0	0	0	0	0	0	0	0	0	0	0	2	0	0	0	0	0	0	0	0
K53-5	2012-08-15	KU5	9	4	Red	Apterous	1	0	0	0	0	0	0		0	0	0	0	0	0	0	0	0	0	0	0	0	0	0	0	0	0	0	0	0	1	0	1	0	0	0	0	0	0
K53-6	2012-08-15	KU5	9	2	Red	Apterous	1	0	0	0	0	0	0		0	0	0	0	0	0	0	0	0	0	0	0	0	0	0	0	0	0	0	0	0	1	0	1	0	0	0	0	0	0
K53-7	2012-08-15	KU5	9	2	Red	Apterous	0	0	0	0	0	0	0		0	0	0	0	0	0	0	0	0	0	0	0	0	0	0	0	0	0	0	0	0	0	1	0	0	0	0	0	0	0
K53-8	2012-08-15	KU5	9	2	Red	Apterous	1	0	0	1	0	0	0		0	0	1	0	0	0	0	0	0	0	0	0	0	0	0	0	0	0	0	0	0	2	0	0	0	0	0	0	0	0
K53-9	2012-08-15	KU5	9	2	Red	Apterous	1	0	0	1	0	0	0		0	0	1	0	0	0	0	0	0	0	0	0	0	0	0	0	0	0	0	0	0	2	0	0	0	0	0	0	0	0
K53-16	2012-08-15	KU5	9	2	Green	Apterous	1	0	0	0	0	0	0		0	0	0	0	0	0	0	0	0	0	0	0	0	0	0	0	0	0	0	0	0	1	0	1	0	0	0	0	0	0
K53-4	2012-08-15	KU5	9	3	Red	Apterous	1	0	0	1	0	0	0		0	0	1	0	0	0	0	0	0	0	0	0	0	0	0	0	0	0	0	0	0	2	0	0	0	0	0	0	0	0
K54-1	2012-08-15	KU6	9	5	Red	Apterous	0	0	0	0	0	0	0		0	0	0	0	0	0	0	0	0	0	0	0	0	0	0	0	0	0	0	0	0	0	1	0	0	0	0	0	0	0
K54-10	2012-08-15	KU6	9	3	Red	Apterous	1	0	0	1	0	0	0		0	0	1	0	0	0	0	0	0	0	0	0	0	0	0	0	0	0	0	0	0	2	0	0	0	0	0	0	0	0
K54-11	2012-08-15	KU6	9	3	Red	Apterous	0	0	0	0	1	0	0		0	0	0	0	0	0	0	0	0	0	0	0	0	0	0	0	0	0	0	0	0	1	0	0	0	0	0	1	0	0
K54-12	2012-08-15	KU6	9	4	Red	Apterous	1	0	0	0	1	0	0		0	0	0	1	0	0	0	0	0	0	0	0	0	0	0	0	0	0	0	0	0	2	0	0	0	0	0	0	0	0
K54-13	2012-08-15	KU6	9	5	Red	Apterous	1	0	0	1	1	0	0		0	0	1	1	0	0	0	0	0	0	0	0	0	0	0	1	0	0	0	0	0	3	0	0	0	0	0	0	0	0
K54-14	2012-08-15	KU6	9	5	Red	Apterous	1	0	0	1	0	0	0		0	0	1	0	0	0	0	0	0	0	0	0	0	0	0	0	0	0	0	0	0	2	0	0	0	0	0	0	0	0
K54-15	2012-08-15	KU6	9	5	Red	Apterous	0	0	0	1	0	0	0		0	0	0	0	0	0	0	0	0	0	0	0	0	0	0	0	0	0	0	0	0	1	0	0	0	0	1	0	0	0
K54-16	2012-08-15	KU6	9	5	Red	Apterous	0	0	0	0	0	0	0		0	0	0	0	0	0	0	0	0	0	0	0	0	0	0	0	0	0	0	0	0	0	1	0	0	0	0	0	0	0
K54-17	2012-08-15	KU6	9	4	Green	Apterous	0	0	0	0	0	0	0		0	0	0	0	0	0	0	0	0	0	0	0	0	0	0	0	0	0	0	0	0	0	1	0	0	0	0	0	0	0
K54-18	2012-08-15	KU6	9	4	Green	Apterous	1	0	0	0	0	0	0		0	0	0	0	0	0	0	0	0	0	0	0	0	0	0	0	0	0	0	0	0	1	0	1	0	0	0	0	0	0
K54-19	2012-08-15	KU6	9	4	Green	Apterous	1	1	0	0	0	0	0		1	0	0	0	0	0	0	0	0	0	0	0	0	0	0	0	0	0	0	0	0	2	0	0	0	0	0	0	0	0
K54-2	2012-08-15	KU6	9	5	Red	Apterous	1	1	0	0	0	0	0		1	0	0	0	0	0	0	0	0	0	0	0	0	0	0	0	0	0	0	0	0	2	0	0	0	0	0	0	0	0
K54-20	2012-08-15	KU6	9	3	Green	Apterous	1	0	0	0	0	0	0		0	0	0	0	0	0	0	0	0	0	0	0	0	0	0	0	0	0	0	0	0	1	0	1	0	0	0	0	0	0
K54-21	2012-08-15	KU6	9	3	Green	Apterous	1	0	0	1	0	0	0		0	0	1	0	0	0	0	0	0	0	0	0	0	0	0	0	0	0	0	0	0	2	0	0	0	0	0	0	0	0
K54-22	2012-08-15	KU6	9	3	Green	Apterous	0	0	0	0	0	0	0		0	0	0	0	0	0	0	0	0	0	0	0	0	0	0	0	0	0	0	0	0	0	1	0	0	0	0	0	0	0
K54-23	2012-08-15	KU6	9	3	Green	Apterous	0	0	0	0	0	0	0		0	0	0	0	0	0	0	0	0	0	0	0	0	0	0	0	0	0	0	0	0	0	1	0	0	0	0	0	0	0
K54-24	2012-08-15	KU6	9	4	Green	Apterous	0	0	0	1	0	0	0		0	0	0	0	0	0	0	0	0	0	0	0	0	0	0	0	0	0	0	0	0	1	0	0	0	0	1	0	0	0
K54-3	2012-08-15	KU6	9	5	Red	Apterous	0	1	0	1	0	0	0		0	0	0	0	0	0	0	1	0	0	0	0	0	0	0	0	0	0	0	0	0	2	0	0	0	0	0	0	0	0
K54-4	2012-08-15	KU6	9	5	Red	Apterous	1	0	0	1	0	0	0		0	0	1	0	0	0	0	0	0	0	0	0	0	0	0	0	0	0	0	0	0	2	0	0	0	0	0	0	0	0
K54-5	2012-08-15	KU6	9	5	Red	Apterous	0	0	0	1	0	0	0		0	0	0	0	0	0	0	0	0	0	0	0	0	0	0	0	0	0	0	0	0	1	0	0	0	0	1	0	0	0
K54-6	2012-08-15	KU6	9	4	Red	Apterous	0	0	0	1	0	0	0		0	0	0	0	0	0	0	0	0	0	0	0	0	0	0	0	0	0	0	0	0	1	0	0	0	0	1	0	0	0
K54-7	2012-08-15	KU6	9	4	Red	Apterous	1	1	0	0	0	0	0		1	0	0	0	0	0	0	0	0	0	0	0	0	0	0	0	0	0	0	0	0	2	0	0	0	0	0	0	0	0
K54-8	2012-08-15	KU6	9	3	Red	Apterous	0	0	0	1	0	0	0		0	0	0	0	0	0	0	0	0	0	0	0	0	0	0	0	0	0	0	0	0	1	0	0	0	0	1	0	0	0
K54-9	2012-08-15	KU6	9	3	Red	Apterous	1	0	0	0	0	0	0		0	0	0	0	0	0	0	0	0	0	0	0	0	0	0	0	0	0	0	0	0	1	0	1	0	0	0	0	0	0
K55-1	2012-08-29	KU1	10	5	Red	Alate	0	0	0	0	0	0	0		0	0	0	0	0	0	0	0	0	0	0	0	0	0	0	0	0	0	0	0	0	0	1	0	0	0	0	0	0	0
K55-10	2012-08-29	KU1	10	3	Green	Apterous	0	0	0	0	0	0	0		0	0	0	0	0	0	0	0	0	0	0	0	0	0	0	0	0	0	0	0	0	0	1	0	0	0	0	0	0	0
K55-2	2012-08-29	KU1	10	2	Red	Apterous	0	0	1	0	0	1	0		0	0	0	0	0	0	0	0	0	0	0	0	0	1	0	0	0	0	0	0	0	2	0	0	0	0	0	0	0	0
K55-3	2012-08-29	KU1	10	5	Green	Alate	1	0	0	0	0	0	0		0	0	0	0	0	0	0	0	0	0	0	0	0	0	0	0	0	0	0	0	0	1	0	1	0	0	0	0	0	0
K55-4	2012-08-29	KU1	10	5	Green	Alate	1	0	0	0	0	0	0		0	0	0	0	0	0	0	0	0	0	0	0	0	0	0	0	0	0	0	0	0	1	0	1	0	0	0	0	0	0
K55-5	2012-08-29	KU1	10	4	Green	Apterous	1	0	0	0	0	0	0		0	0	0	0	0	0	0	0	0	0	0	0	0	0	0	0	0	0	0	0	0	1	0	1	0	0	0	0	0	0
K55-6	2012-08-29	KU1	10	4	Green	Apterous	1	0	0	0	0	0	0		0	0	0	0	0	0	0	0	0	0	0	0	0	0	0	0	0	0	0	0	0	1	0	1	0	0	0	0	0	0
K55-7	2012-08-29	KU1	10	5	Green	Apterous	0	0	1	0	0	1	0		0	0	0	0	0	0	0	0	0	0	0	0	0	1	0	0	0	0	0	0	0	2	0	0	0	0	0	0	0	0
K55-8	2012-08-29	KU1	10	2	Green	Apterous	0	0	0	0	0	0	0		0	0	0	0	0	0	0	0	0	0	0	0	0	0	0	0	0	0	0	0	0	0	1	0	0	0	0	0	0	0
K55-9	2012-08-29	KU1	10	2	Green	Apterous	0	0	0	0	0	0	0		0	0	0	0	0	0	0	0	0	0	0	0	0	0	0	0	0	0	0	0	0	0	1	0	0	0	0	0	0	0
K56-1	2012-08-29	KU2	10	5	Green	Apterous	0	0	0	0	0	0	0		0	0	0	0	0	0	0	0	0	0	0	0	0	0	0	0	0	0	0	0	0	0	1	0	0	0	0	0	0	0
K56-10	2012-08-29	KU2	10	3	Green	Apterous	0	0	0	0	0	0	0		0	0	0	0	0	0	0	0	0	0	0	0	0	0	0	0	0	0	0	0	0	0	1	0	0	0	0	0	0	0
K56-12	2012-08-29	KU2	10	4	Green	Apterous	0	0	0	0	0	0	0		0	0	0	0	0	0	0	0	0	0	0	0	0	0	0	0	0	0	0	0	0	0	1	0	0	0	0	0	0	0
K56-13	2012-08-29	KU2	10	5	Red	Apterous	1	0	0	0	0	0	0		0	0	0	0	0	0	0	0	0	0	0	0	0	0	0	0	0	0	0	0	0	1	0	1	0	0	0	0	0	0
K56-14	2012-08-29	KU2	10	4	Red	Apterous	1	0	0	0	0	0	0		0	0	0	0	0	0	0	0	0	0	0	0	0	0	0	0	0	0	0	0	0	1	0	1	0	0	0	0	0	0
K56-15	2012-08-29	KU2	10	4	Red	Apterous	0	0	0	0	0	0	0		0	0	0	0	0	0	0	0	0	0	0	0	0	0	0	0	0	0	0	0	0	0	1	0	0	0	0	0	0	0
K56-16	2012-08-29	KU2	10	4	Red	Apterous	1	0	0	0	0	0	0		0	0	0	0	0	0	0	0	0	0	0	0	0	0	0	0	0	0	0	0	0	1	0	1	0	0	0	0	0	0
K56-17	2012-08-29	KU2	10	5	Red	Apterous	0	0	0	0	0	0	0		0	0	0	0	0	0	0	0	0	0	0	0	0	0	0	0	0	0	0	0	0	0	1	0	0	0	0	0	0	0
K56-18	2012-08-29	KU2	10	3	Red	Apterous	0	0	0	1	0	0	0		0	0	0	0	0	0	0	0	0	0	0	0	0	0	0	0	0	0	0	0	0	1	0	0	0	0	1	0	0	0
K56-19	2012-08-29	KU2	10	3	Red	Apterous	0	0	0	0	0	0	0		0	0	0	0	0	0	0	0	0	0	0	0	0	0	0	0	0	0	0	0	0	0	1	0	0	0	0	0	0	0
K56-2	2012-08-29	KU2	10	5	Green	Apterous	0	0	0	0	0	0	0		0	0	0	0	0	0	0	0	0	0	0	0	0	0	0	0	0	0	0	0	0	0	1	0	0	0	0	0	0	0
K56-20	2012-08-29	KU2	10	2	Red	Apterous	1	0	0	0	0	0	0		0	0	0	0	0	0	0	0	0	0	0	0	0	0	0	0	0	0	0	0	0	1	0	1	0	0	0	0	0	0
K56-21	2012-08-29	KU2	10	2	Red	Apterous	0	0	0	0	0	0	0		0	0	0	0	0	0	0	0	0	0	0	0	0	0	0	0	0	0	0	0	0	0	1	0	0	0	0	0	0	0
K56-22	2012-08-29	KU2	10	2	Red	Apterous	1	0	0	0	0	0	0		0	0	0	0	0	0	0	0	0	0	0	0	0	0	0	0	0	0	0	0	0	1	0	1	0	0	0	0	0	0
K56-23	2012-08-29	KU2	10	2	Red	Apterous	0	0	0	0	0	0	0		0	0	0	0	0	0	0	0	0	0	0	0	0	0	0	0	0	0	0	0	0	0	1	0	0	0	0	0	0	0
K56-24	2012-08-29	KU2	10	2	Red	Apterous	1	0	0	0	0	0	0		0	0	0	0	0	0	0	0	0	0	0	0	0	0	0	0	0	0	0	0	0	1	0	1	0	0	0	0	0	0
K56-3	2012-08-29	KU2	10	4	Green	Apterous	0	1	0	0	0	0	0		0	0	0	0	0	0	0	0	0	0	0	0	0	0	0	0	0	0	0	0	0	1	0	0	1	0	0	0	0	0
K56-4	2012-08-29	KU2	10	5	Green	Alate	0	0	0	0	0	0	0		0	0	0	0	0	0	0	0	0	0	0	0	0	0	0	0	0	0	0	0	0	0	1	0	0	0	0	0	0	0
K56-5	2012-08-29	KU2	10	4	Green	Apterous	0	0	0	0	0	0	0		0	0	0	0	0	0	0	0	0	0	0	0	0	0	0	0	0	0	0	0	0	0	1	0	0	0	0	0	0	0
K56-6	2012-08-29	KU2	10	4	Green	Apterous	0	0	0	0	0	0	0		0	0	0	0	0	0	0	0	0	0	0	0	0	0	0	0	0	0	0	0	0	0	1	0	0	0	0	0	0	0
K56-7	2012-08-29	KU2	10	4	Green	Apterous	0	0	0	0	0	1	0		0	0	0	0	0	0	0	0	0	0	0	0	0	0	0	0	0	0	0	0	0	1	0	0	0	0	0	0	1	0
K56-8	2012-08-29	KU2	10	4	Green	Apterous	0	0	0	0	0	0	0		0	0	0	0	0	0	0	0	0	0	0	0	0	0	0	0	0	0	0	0	0	0	1	0	0	0	0	0	0	0
K56-9	2012-08-29	KU2	10	3	Green	Apterous	0	0	0	1	0	0	0		0	0	0	0	0	0	0	0	0	0	0	0	0	0	0	0	0	0	0	0	0	1	0	0	0	0	1	0	0	0
K56-11	2012-08-29	KU2	10	4	Green	Apterous	0	0	0	0	0	0	0		0	0	0	0	0	0	0	0	0	0	0	0	0	0	0	0	0	0	0	0	0	0	1	0	0	0	0	0	0	0
K57-1	2012-08-29	KU3	10	5	Green	Apterous	1	0	0	0	0	0	0		0	0	0	0	0	0	0	0	0	0	0	0	0	0	0	0	0	0	0	0	0	1	0	1	0	0	0	0	0	0
K57-10	2012-08-29	KU3	10	4	Green	Apterous	1	0	0	0	0	0	0		0	0	0	0	0	0	0	0	0	0	0	0	0	0	0	0	0	0	0	0	0	1	0	1	0	0	0	0	0	0
K57-12	2012-08-29	KU3	10	4	Green	Apterous	0	0	0	0	0	0	0		0	0	0	0	0	0	0	0	0	0	0	0	0	0	0	0	0	0	0	0	0	0	1	0	0	0	0	0	0	0
K57-13	2012-08-29	KU3	10	5	Red	Apterous	1	0	0	1	0	0	0		0	0	1	0	0	0	0	0	0	0	0	0	0	0	0	0	0	0	0	0	0	2	0	0	0	0	0	0	0	0
K57-14	2012-08-29	KU3	10	5	Red	Apterous	0	0	0	0	0	0	0		0	0	0	0	0	0	0	0	0	0	0	0	0	0	0	0	0	0	0	0	0	0	1	0	0	0	0	0	0	0
K57-15	2012-08-29	KU3	10	5	Red	Apterous	1	0	0	0	0	0	0		0	0	0	0	0	0	0	0	0	0	0	0	0	0	0	0	0	0	0	0	0	1	0	1	0	0	0	0	0	0
K57-16	2012-08-29	KU3	10	5	Red	Apterous	1	0	0	1	0	0	0		0	0	1	0	0	0	0	0	0	0	0	0	0	0	0	0	0	0	0	0	0	2	0	0	0	0	0	0	0	0
K57-17	2012-08-29	KU3	10	5	Red	Apterous	1	0	0	0	0	0	0		0	0	0	0	0	0	0	0	0	0	0	0	0	0	0	0	0	0	0	0	0	1	0	1	0	0	0	0	0	0
K57-18	2012-08-29	KU3	10	5	Red	Apterous	1	0	0	0	0	0	0		0	0	0	0	0	0	0	0	0	0	0	0	0	0	0	0	0	0	0	0	0	1	0	1	0	0	0	0	0	0
K57-19	2012-08-29	KU3	10	4	Red	Apterous	1	0	0	0	0	0	0		0	0	0	0	0	0	0	0	0	0	0	0	0	0	0	0	0	0	0	0	0	1	0	1	0	0	0	0	0	0
K57-2	2012-08-29	KU3	10	5	Green	Apterous	0	0	0	0	0	0	0		0	0	0	0	0	0	0	0	0	0	0	0	0	0	0	0	0	0	0	0	0	0	1	0	0	0	0	0	0	0
K57-20	2012-08-29	KU3	10	4	Red	Apterous	1	0	0	0	0	0	0		0	0	0	0	0	0	0	0	0	0	0	0	0	0	0	0	0	0	0	0	0	1	0	1	0	0	0	0	0	0
K57-21	2012-08-29	KU3	10	4	Red	Apterous	1	1	0	0	0	0	0		1	0	0	0	0	0	0	0	0	0	0	0	0	0	0	0	0	0	0	0	0	2	0	0	0	0	0	0	0	0
K57-22	2012-08-29	KU3	10	3	Red	Apterous	0	0	0	0	0	0	0		0	0	0	0	0	0	0	0	0	0	0	0	0	0	0	0	0	0	0	0	0	0	1	0	0	0	0	0	0	0
K57-24	2012-08-29	KU3	10	4	Red	Apterous	0	1	0	0	0	0	0		0	0	0	0	0	0	0	0	0	0	0	0	0	0	0	0	0	0	0	0	0	1	0	0	1	0	0	0	0	0
K57-3	2012-08-29	KU3	10	5	Green	Apterous	1	0	0	1	0	0	0		0	0	1	0	0	0	0	0	0	0	0	0	0	0	0	0	0	0	0	0	0	2	0	0	0	0	0	0	0	0
K57-4	2012-08-29	KU3	10	5	Green	Apterous	0	0	0	0	0	0	0		0	0	0	0	0	0	0	0	0	0	0	0	0	0	0	0	0	0	0	0	0	0	1	0	0	0	0	0	0	0
K57-5	2012-08-29	KU3	10	5	Green	Alate	1	0	0	1	0	0	0		0	0	1	0	0	0	0	0	0	0	0	0	0	0	0	0	0	0	0	0	0	2	0	0	0	0	0	0	0	0
K57-6	2012-08-29	KU3	10	4	Green	Apterous	0	0	0	1	0	0	0		0	0	0	0	0	0	0	0	0	0	0	0	0	0	0	0	0	0	0	0	0	1	0	0	0	0	1	0	0	0
K57-7	2012-08-29	KU3	10	4	Green	Apterous	0	0	0	0	0	0	0		0	0	0	0	0	0	0	0	0	0	0	0	0	0	0	0	0	0	0	0	0	0	1	0	0	0	0	0	0	0
K57-9	2012-08-29	KU3	10	5	Green	Alate	1	0	0	0	0	0	0		0	0	0	0	0	0	0	0	0	0	0	0	0	0	0	0	0	0	0	0	0	1	0	1	0	0	0	0	0	0
K57-11	2012-08-29	KU3	10	4	Green	Apterous	1	0	0	0	0	0	0		0	0	0	0	0	0	0	0	0	0	0	0	0	0	0	0	0	0	0	0	0	1	0	1	0	0	0	0	0	0
K58-1	2012-08-29	KU4	10	5	Red	Apterous	1	1	0	0	0	0	0		1	0	0	0	0	0	0	0	0	0	0	0	0	0	0	0	0	0	0	0	0	2	0	0	0	0	0	0	0	0
K58-10	2012-08-29	KU4	10	4	Red	Apterous	1	0	0	0	0	0	0		0	0	0	0	0	0	0	0	0	0	0	0	0	0	0	0	0	0	0	0	0	1	0	1	0	0	0	0	0	0
K58-11	2012-08-29	KU4	10	4	Red	Apterous	0	0	0	0	0	0	0		0	0	0	0	0	0	0	0	0	0	0	0	0	0	0	0	0	0	0	0	0	0	1	0	0	0	0	0	0	0
K58-12	2012-08-29	KU4	10	4	Red	Apterous	0	0	0	0	0	0	0		0	0	0	0	0	0	0	0	0	0	0	0	0	0	0	0	0	0	0	0	0	0	1	0	0	0	0	0	0	0
K58-13	2012-08-29	KU4	10	5	Green	Apterous	1	1	0	0	0	0	0		1	0	0	0	0	0	0	0	0	0	0	0	0	0	0	0	0	0	0	0	0	2	0	0	0	0	0	0	0	0
K58-14	2012-08-29	KU4	10	4	Green	Apterous	0	0	0	0	0	1	0		0	0	0	0	0	0	0	0	0	0	0	0	0	0	0	0	0	0	0	0	0	1	0	0	0	0	0	0	1	0
K58-15	2012-08-29	KU4	10	4	Green	Apterous	1	0	0	1	0	0	0		0	0	1	0	0	0	0	0	0	0	0	0	0	0	0	0	0	0	0	0	0	2	0	0	0	0	0	0	0	0
K58-16	2012-08-29	KU4	10	5	Green	Apterous	1	0	0	0	0	0	0		0	0	0	0	0	0	0	0	0	0	0	0	0	0	0	0	0	0	0	0	0	1	0	1	0	0	0	0	0	0
K58-17	2012-08-29	KU4	10	4	Green	Apterous	0	0	0	0	0	1	0		0	0	0	0	0	0	0	0	0	0	0	0	0	0	0	0	0	0	0	0	0	1	0	0	0	0	0	0	1	0
K58-18	2012-08-29	KU4	10	5	Green	Apterous	1	0	0	0	0	0	0		0	0	0	0	0	0	0	0	0	0	0	0	0	0	0	0	0	0	0	0	0	1	0	1	0	0	0	0	0	0
K58-19	2012-08-29	KU4	10	4	Green	Apterous	0	0	1	0	0	1	0		0	0	0	0	0	0	0	0	0	0	0	0	0	1	0	0	0	0	0	0	0	2	0	0	0	0	0	0	0	0
K58-2	2012-08-29	KU4	10	5	Red	Apterous	1	0	0	0	0	0	0		0	0	0	0	0	0	0	0	0	0	0	0	0	0	0	0	0	0	0	0	0	1	0	1	0	0	0	0	0	0
K58-20	2012-08-29	KU4	10	4	Green	Apterous	0	0	0	0	0	0	0		0	0	0	0	0	0	0	0	0	0	0	0	0	0	0	0	0	0	0	0	0	0	1	0	0	0	0	0	0	0
K58-21	2012-08-29	KU4	10	5	Green	Apterous	1	0	0	0	0	0	0		0	0	0	0	0	0	0	0	0	0	0	0	0	0	0	0	0	0	0	0	0	1	0	1	0	0	0	0	0	0
K58-22	2012-08-29	KU4	10	5	Green	Apterous	1	0	0	0	0	0	0		0	0	0	0	0	0	0	0	0	0	0	0	0	0	0	0	0	0	0	0	0	1	0	1	0	0	0	0	0	0
K58-23	2012-08-29	KU4	10	4	Green	Apterous	1	0	1	0	0	1	0		0	1	0	0	1	0	0	0	0	0	0	0	0	1	0	0	0	0	0	0	0	3	0	0	0	0	0	0	0	0
K58-24	2012-08-29	KU4	10	4	Green	Apterous	1	0	1	1	0	0	0		0	1	1	0	0	0	0	0	0	0	0	1	0	0	0	0	0	0	0	0	0	3	0	0	0	0	0	0	0	0
K58-3	2012-08-29	KU4	10	5	Red	Apterous	0	0	0	0	0	0	1		0	0	0	0	0	0	0	0	0	0	0	0	0	0	0	0	0	0	0	0	0	1	0	0	0	0	0	0	0	1
K58-4	2012-08-29	KU4	10	5	Red	Apterous	1	0	0	1	0	0	0		0	0	1	0	0	0	0	0	0	0	0	0	0	0	0	0	0	0	0	0	0	2	0	0	0	0	0	0	0	0
K58-5	2012-08-29	KU4	10	5	Red	Apterous	0	0	0	0	0	0	0		0	0	0	0	0	0	0	0	0	0	0	0	0	0	0	0	0	0	0	0	0	0	1	0	0	0	0	0	0	0
K58-6	2012-08-29	KU4	10	5	Red	Apterous	1	0	0	0	0	0	0		0	0	0	0	0	0	0	0	0	0	0	0	0	0	0	0	0	0	0	0	0	1	0	1	0	0	0	0	0	0
K58-7	2012-08-29	KU4	10	5	Red	Alate	1	0	0	1	0	0	0		0	0	1	0	0	0	0	0	0	0	0	0	0	0	0	0	0	0	0	0	0	2	0	0	0	0	0	0	0	0
K58-8	2012-08-29	KU4	10	5	Red	Apterous	1	0	0	0	0	0	0		0	0	0	0	0	0	0	0	0	0	0	0	0	0	0	0	0	0	0	0	0	1	0	1	0	0	0	0	0	0
K58-9	2012-08-29	KU4	10	4	Red	Apterous	0	0	0	0	0	0	0		0	0	0	0	0	0	0	0	0	0	0	0	0	0	0	0	0	0	0	0	0	0	1	0	0	0	0	0	0	0
K59-1	2012-08-29	KU5	10	5	Green	Alate	1	0	0	1	0	0	0		0	0	1	0	0	0	0	0	0	0	0	0	0	0	0	0	0	0	0	0	0	2	0	0	0	0	0	0	0	0
K59-10	2012-08-29	KU5	10	2	Red	Apterous	1	0	0	1	0	0	0		0	0	1	0	0	0	0	0	0	0	0	0	0	0	0	0	0	0	0	0	0	2	0	0	0	0	0	0	0	0
K59-2	2012-08-29	KU5	10	5	Green	Alate	0	0	0	0	0	0	1		0	0	0	0	0	0	0	0	0	0	0	0	0	0	0	0	0	0	0	0	0	1	0	0	0	0	0	0	0	1
K59-3	2012-08-29	KU5	10	2	Green	Apterous	0	1	0	0	0	0	0		0	0	0	0	0	0	0	0	0	0	0	0	0	0	0	0	0	0	0	0	0	1	0	0	1	0	0	0	0	0
K59-4	2012-08-29	KU5	10	1	Green	Apterous	1	0	0	0	0	0	0		0	0	0	0	0	0	0	0	0	0	0	0	0	0	0	0	0	0	0	0	0	1	0	1	0	0	0	0	0	0
K59-5	2012-08-29	KU5	10	2	Green	Apterous	1	0	0	1	0	0	0		0	0	1	0	0	0	0	0	0	0	0	0	0	0	0	0	0	0	0	0	0	2	0	0	0	0	0	0	0	0
K59-6	2012-08-29	KU5	10	5	Red	Apterous	1	0	0	1	0	0	0		0	0	1	0	0	0	0	0	0	0	0	0	0	0	0	0	0	0	0	0	0	2	0	0	0	0	0	0	0	0
K59-7	2012-08-29	KU5	10	5	Red	Apterous	0	0	0	0	0	0	0		0	0	0	0	0	0	0	0	0	0	0	0	0	0	0	0	0	0	0	0	0	0	1	0	0	0	0	0	0	0
K59-8	2012-08-29	KU5	10	5	Red	Alate	1	0	0	1	0	0	0		0	0	1	0	0	0	0	0	0	0	0	0	0	0	0	0	0	0	0	0	0	2	0	0	0	0	0	0	0	0
K59-9	2012-08-29	KU5	10	5	Red	Alate	0	0	0	0	0	0	0		0	0	0	0	0	0	0	0	0	0	0	0	0	0	0	0	0	0	0	0	0	0	1	0	0	0	0	0	0	0
K61-2	2012-09-11	KU1	11	3	Red	Apterous	0	0	0	0	0	1	0		0	0	0	0	0	0	0	0	0	0	0	0	0	0	0	0	0	0	0	0	0	1	0	0	0	0	0	0	1	0
K61-10	2012-09-11	KU1	11	2	Red	Apterous	0	0	0	0	0	0	0		0	0	0	0	0	0	0	0	0	0	0	0	0	0	0	0	0	0	0	0	0	0	1	0	0	0	0	0	0	0
K61-11	2012-09-11	KU1	11	2	Red	Apterous	1	0	0	0	0	0	0		0	0	0	0	0	0	0	0	0	0	0	0	0	0	0	0	0	0	0	0	0	1	0	1	0	0	0	0	0	0
K61-12	2012-09-11	KU1	11	5	Red	Alate	1	0	0	0	0	0	0		0	0	0	0	0	0	0	0	0	0	0	0	0	0	0	0	0	0	0	0	0	1	0	1	0	0	0	0	0	0
K61-13	2012-09-11	KU1	11	3	Green	Apterous	0	0	0	0	0	0	0		0	0	0	0	0	0	0	0	0	0	0	0	0	0	0	0	0	0	0	0	0	0	1	0	0	0	0	0	0	0
K61-14	2012-09-11	KU1	11	2	Green	Apterous	0	0	0	0	0	1	0		0	0	0	0	0	0	0	0	0	0	0	0	0	0	0	0	0	0	0	0	0	1	0	0	0	0	0	0	1	0
K61-15	2012-09-11	KU1	11	3	Green	Apterous	0	0	0	0	0	1	0		0	0	0	0	0	0	0	0	0	0	0	0	0	0	0	0	0	0	0	0	0	1	0	0	0	0	0	0	1	0
K61-17	2012-09-11	KU1	11	3	Green	Apterous	1	0	0	0	0	1	0		0	0	0	0	1	0	0	0	0	0	0	0	0	0	0	0	0	0	0	0	0	2	0	0	0	0	0	0	0	0
K61-20	2012-09-11	KU1	11	3	Green	Apterous	1	0	0	0	0	0	0		0	0	0	0	0	0	0	0	0	0	0	0	0	0	0	0	0	0	0	0	0	1	0	1	0	0	0	0	0	0
K61-3	2012-09-11	KU1	11	3	Red	Apterous	1	0	0	0	0	0	0		0	0	0	0	0	0	0	0	0	0	0	0	0	0	0	0	0	0	0	0	0	1	0	1	0	0	0	0	0	0
K61-4	2012-09-11	KU1	11	3	Red	Apterous	0	0	0	0	0	0	0		0	0	0	0	0	0	0	0	0	0	0	0	0	0	0	0	0	0	0	0	0	0	1	0	0	0	0	0	0	0
K61-5	2012-09-11	KU1	11	3	Red	Apterous	1	0	0	0	0	0	0		0	0	0	0	0	0	0	0	0	0	0	0	0	0	0	0	0	0	0	0	0	1	0	1	0	0	0	0	0	0
K61-6	2012-09-11	KU1	11	3	Red	Apterous	1	1	0	0	0	0	0		1	0	0	0	0	0	0	0	0	0	0	0	0	0	0	0	0	0	0	0	0	2	0	0	0	0	0	0	0	0
K61-7	2012-09-11	KU1	11	3	Red	Apterous	1	0	0	0	0	0	0		0	0	0	0	0	0	0	0	0	0	0	0	0	0	0	0	0	0	0	0	0	1	0	1	0	0	0	0	0	0
K61-8	2012-09-11	KU1	11	3	Red	Apterous	0	0	0	0	0	0	0		0	0	0	0	0	0	0	0	0	0	0	0	0	0	0	0	0	0	0	0	0	0	1	0	0	0	0	0	0	0
K61-9	2012-09-11	KU1	11	5	Red	Alate	0	0	0	0	0	0	0		0	0	0	0	0	0	0	0	0	0	0	0	0	0	0	0	0	0	0	0	0	0	1	0	0	0	0	0	0	0
K61-16	2012-09-11	KU1	11	3	Green	Apterous	0	0	0	0	0	0	0		0	0	0	0	0	0	0	0	0	0	0	0	0	0	0	0	0	0	0	0	0	0	1	0	0	0	0	0	0	0
K61-18	2012-09-11	KU1	11	3	Green	Apterous	0	1	0	0	0	0	0		0	0	0	0	0	0	0	0	0	0	0	0	0	0	0	0	0	0	0	0	0	1	0	0	1	0	0	0	0	0
K61-19	2012-09-11	KU1	11	4	Green	Apterous	0	0	0	0	0	0	0		0	0	0	0	0	0	0	0	0	0	0	0	0	0	0	0	0	0	0	0	0	0	1	0	0	0	0	0	0	0
K61-21	2012-09-11	KU1	11	3	Green	Apterous	0	1	0	0	0	0	0		0	0	0	0	0	0	0	0	0	0	0	0	0	0	0	0	0	0	0	0	0	1	0	0	1	0	0	0	0	0
K61-22	2012-09-11	KU1	11	4	Green	Apterous	0	1	0	0	0	0	0		0	0	0	0	0	0	0	0	0	0	0	0	0	0	0	0	0	0	0	0	0	1	0	0	1	0	0	0	0	0
K61-23	2012-09-11	KU1	11	3	Green	Apterous	1	0	0	1	0	0	0		0	0	1	0	0	0	0	0	0	0	0	0	0	0	0	0	0	0	0	0	0	2	0	0	0	0	0	0	0	0
K61-24	2012-09-11	KU1	11	3	Green	Apterous	0	1	0	0	0	0	0		0	0	0	0	0	0	0	0	0	0	0	0	0	0	0	0	0	0	0	0	0	1	0	0	1	0	0	0	0	0
K62-18	2012-09-11	KU2	11	3	Green	Apterous	0	0	0	0	0	1	0		0	0	0	0	0	0	0	0	0	0	0	0	0	0	0	0	0	0	0	0	0	1	0	0	0	0	0	0	1	0
K62-1	2012-09-11	KU2	11	3	Red	Apterous	1	0	0	0	0	0	0		0	0	0	0	0	0	0	0	0	0	0	0	0	0	0	0	0	0	0	0	0	1	0	1	0	0	0	0	0	0
K62-10	2012-09-11	KU2	11	2	Red	Apterous	1	0	0	0	0	0	0		0	0	0	0	0	0	0	0	0	0	0	0	0	0	0	0	0	0	0	0	0	1	0	1	0	0	0	0	0	0
K62-11	2012-09-11	KU2	11	3	Green	Apterous	0	1	0	0	0	0	0		0	0	0	0	0	0	0	0	0	0	0	0	0	0	0	0	0	0	0	0	0	1	0	0	1	0	0	0	0	0
K62-12	2012-09-11	KU2	11	3	Green	Apterous	1	0	0	0	0	0	0		0	0	0	0	0	0	0	0	0	0	0	0	0	0	0	0	0	0	0	0	0	1	0	1	0	0	0	0	0	0
K62-13	2012-09-11	KU2	11	2	Green	Apterous	1	0	0	0	0	0	0		0	0	0	0	0	0	0	0	0	0	0	0	0	0	0	0	0	0	0	0	0	1	0	1	0	0	0	0	0	0
K62-14	2012-09-11	KU2	11	4	Green	Apterous	0	0	0	1	0	0	0		0	0	0	0	0	0	0	0	0	0	0	0	0	0	0	0	0	0	0	0	0	1	0	0	0	0	1	0	0	0
K62-15	2012-09-11	KU2	11	3	Green	Apterous	1	0	0	0	0	0	0		0	0	0	0	0	0	0	0	0	0	0	0	0	0	0	0	0	0	0	0	0	1	0	1	0	0	0	0	0	0
K62-16	2012-09-11	KU2	11	2	Green	Apterous	0	0	0	0	0	0	0		0	0	0	0	0	0	0	0	0	0	0	0	0	0	0	0	0	0	0	0	0	0	1	0	0	0	0	0	0	0
K62-17	2012-09-11	KU2	11	4	Green	Apterous	0	1	0	0	0	0	0		0	0	0	0	0	0	0	0	0	0	0	0	0	0	0	0	0	0	0	0	0	1	0	0	1	0	0	0	0	0
K62-19	2012-09-11	KU2	11	3	Green	Apterous	1	0	0	1	0	0	0		0	0	1	0	0	0	0	0	0	0	0	0	0	0	0	0	0	0	0	0	0	2	0	0	0	0	0	0	0	0
K62-2	2012-09-11	KU2	11	4	Red	Apterous	1	0	0	0	0	0	0		0	0	0	0	0	0	0	0	0	0	0	0	0	0	0	0	0	0	0	0	0	1	0	1	0	0	0	0	0	0
K62-20	2012-09-11	KU2	11	3	Green	Apterous	1	0	0	0	0	0	0		0	0	0	0	0	0	0	0	0	0	0	0	0	0	0	0	0	0	0	0	0	1	0	1	0	0	0	0	0	0
K62-3	2012-09-11	KU2	11	2	Red	Apterous	1	0	0	0	0	0	0		0	0	0	0	0	0	0	0	0	0	0	0	0	0	0	0	0	0	0	0	0	1	0	1	0	0	0	0	0	0
K62-4	2012-09-11	KU2	11	3	Red	Apterous	1	0	0	0	0	0	0		0	0	0	0	0	0	0	0	0	0	0	0	0	0	0	0	0	0	0	0	0	1	0	1	0	0	0	0	0	0
K62-5	2012-09-11	KU2	11	3	Red	Apterous	0	0	0	0	0	0	0		0	0	0	0	0	0	0	0	0	0	0	0	0	0	0	0	0	0	0	0	0	0	1	0	0	0	0	0	0	0
K62-6	2012-09-11	KU2	11	4	Red	Apterous	1	0	0	0	0	0	0		0	0	0	0	0	0	0	0	0	0	0	0	0	0	0	0	0	0	0	0	0	1	0	1	0	0	0	0	0	0
K62-7	2012-09-11	KU2	11	3	Red	Apterous	1	0	0	0	0	0	0		0	0	0	0	0	0	0	0	0	0	0	0	0	0	0	0	0	0	0	0	0	1	0	1	0	0	0	0	0	0
K62-8	2012-09-11	KU2	11	3	Red	Apterous	1	0	0	0	0	0	0		0	0	0	0	0	0	0	0	0	0	0	0	0	0	0	0	0	0	0	0	0	1	0	1	0	0	0	0	0	0
K62-9	2012-09-11	KU2	11	3	Red	Apterous	0	0	0	0	0	0	0		0	0	0	0	0	0	0	0	0	0	0	0	0	0	0	0	0	0	0	0	0	0	1	0	0	0	0	0	0	0
K63-1	2012-09-11	KU3	11	5	Red	Alate	1	0	0	0	0	0	0		0	0	0	0	0	0	0	0	0	0	0	0	0	0	0	0	0	0	0	0	0	1	0	1	0	0	0	0	0	0
K63-10	2012-09-11	KU3	11	2	Red	Apterous	0	0	0	1	0	0	0		0	0	0	0	0	0	0	0	0	0	0	0	0	0	0	0	0	0	0	0	0	1	0	0	0	0	1	0	0	0
K63-11	2012-09-11	KU3	11	2	Red	Apterous	1	0	0	0	0	0	0		0	0	0	0	0	0	0	0	0	0	0	0	0	0	0	0	0	0	0	0	0	1	0	1	0	0	0	0	0	0
K63-12	2012-09-11	KU3	11	2	Red	Apterous	0	0	0	1	0	0	0		0	0	0	0	0	0	0	0	0	0	0	0	0	0	0	0	0	0	0	0	0	1	0	0	0	0	1	0	0	0
K63-13	2012-09-11	KU3	11	5	Green	Apterous	1	0	0	1	0	0	0		0	0	1	0	0	0	0	0	0	0	0	0	0	0	0	0	0	0	0	0	0	2	0	0	0	0	0	0	0	0
K63-14	2012-09-11	KU3	11	5	Green	Alate	0	0	0	1	0	0	0		0	0	0	0	0	0	0	0	0	0	0	0	0	0	0	0	0	0	0	0	0	1	0	0	0	0	1	0	0	0
K63-15	2012-09-11	KU3	11	3	Green	Apterous	0	0	0	1	0	0	0		0	0	0	0	0	0	0	0	0	0	0	0	0	0	0	0	0	0	0	0	0	1	0	0	0	0	1	0	0	0
K63-16	2012-09-11	KU3	11	5	Green	Alate	1	0	0	1	0	0	0		0	0	1	0	0	0	0	0	0	0	0	0	0	0	0	0	0	0	0	0	0	2	0	0	0	0	0	0	0	0
K63-17	2012-09-11	KU3	11	2	Green	Apterous	0	0	0	1	0	0	0		0	0	0	0	0	0	0	0	0	0	0	0	0	0	0	0	0	0	0	0	0	1	0	0	0	0	1	0	0	0
K63-18	2012-09-11	KU3	11	3	Green	Apterous	1	0	0	0	0	0	0		0	0	0	0	0	0	0	0	0	0	0	0	0	0	0	0	0	0	0	0	0	1	0	1	0	0	0	0	0	0
K63-19	2012-09-11	KU3	11	4	Green	Apterous	1	0	0	0	0	0	0		0	0	0	0	0	0	0	0	0	0	0	0	0	0	0	0	0	0	0	0	0	1	0	1	0	0	0	0	0	0
K63-2	2012-09-11	KU3	11	2	Red	Apterous	0	0	0	1	0	0	0		0	0	0	0	0	0	0	0	0	0	0	0	0	0	0	0	0	0	0	0	0	1	0	0	0	0	1	0	0	0
K63-20	2012-09-11	KU3	11	2	Green	Apterous	0	0	0	0	0	0	0		0	0	0	0	0	0	0	0	0	0	0	0	0	0	0	0	0	0	0	0	0	0	1	0	0	0	0	0	0	0
K63-21	2012-09-11	KU3	11	2	Green	Apterous	0	1	0	0	0	0	0		0	0	0	0	0	0	0	0	0	0	0	0	0	0	0	0	0	0	0	0	0	1	0	0	1	0	0	0	0	0
K63-22	2012-09-11	KU3	11	2	Green	Apterous	0	1	0	0	0	0	0		0	0	0	0	0	0	0	0	0	0	0	0	0	0	0	0	0	0	0	0	0	1	0	0	1	0	0	0	0	0
K63-23	2012-09-11	KU3	11	1	Green	Apterous	1	0	0	0	0	0	0		0	0	0	0	0	0	0	0	0	0	0	0	0	0	0	0	0	0	0	0	0	1	0	1	0	0	0	0	0	0
K63-24	2012-09-11	KU3	11	2	Green	Apterous	1	1	0	0	0	0	0		1	0	0	0	0	0	0	0	0	0	0	0	0	0	0	0	0	0	0	0	0	2	0	0	0	0	0	0	0	0
K63-3	2012-09-11	KU3	11	2	Red	Apterous	0	0	0	1	0	0	0		0	0	0	0	0	0	0	0	0	0	0	0	0	0	0	0	0	0	0	0	0	1	0	0	0	0	1	0	0	0
K63-4	2012-09-11	KU3	11	2	Red	Apterous	0	0	0	0	0	0	0		0	0	0	0	0	0	0	0	0	0	0	0	0	0	0	0	0	0	0	0	0	0	1	0	0	0	0	0	0	0
K63-5	2012-09-11	KU3	11	2	Red	Apterous	1	0	0	0	0	0	0		0	0	0	0	0	0	0	0	0	0	0	0	0	0	0	0	0	0	0	0	0	1	0	1	0	0	0	0	0	0
K63-6	2012-09-11	KU3	11	1	Red	Apterous	0	0	0	0	0	0	0		0	0	0	0	0	0	0	0	0	0	0	0	0	0	0	0	0	0	0	0	0	0	1	0	0	0	0	0	0	0
K63-7	2012-09-11	KU3	11	3	Red	Apterous	1	0	0	1	0	0	0		0	0	1	0	0	0	0	0	0	0	0	0	0	0	0	0	0	0	0	0	0	2	0	0	0	0	0	0	0	0
K63-8	2012-09-11	KU3	11	2	Red	Apterous	1	0	0	0	0	0	0		0	0	0	0	0	0	0	0	0	0	0	0	0	0	0	0	0	0	0	0	0	1	0	1	0	0	0	0	0	0
K63-9	2012-09-11	KU3	11	2	Red	Apterous	1	0	0	0	0	0	0		0	0	0	0	0	0	0	0	0	0	0	0	0	0	0	0	0	0	0	0	0	1	0	1	0	0	0	0	0	0
K64-16	2012-09-11	KU4	11	4	Red	Apterous	0	0	0	1	0	1	0		0	0	0	0	0	0	0	0	0	0	0	0	0	0	0	0	1	0	0	0	0	2	0	0	0	0	0	0	0	0
K64-17	2012-09-11	KU4	11	4	Red	Apterous	0	0	0	0	0	1	0		0	0	0	0	0	0	0	0	0	0	0	0	0	0	0	0	0	0	0	0	0	1	0	0	0	0	0	0	1	0
K64-19	2012-09-11	KU4	11	5	Red	Apterous	1	0	0	1	0	1	0		0	0	1	0	1	0	0	0	0	0	0	0	0	0	0	0	1	0	0	0	0	3	0	0	0	0	0	0	0	0
K64-23	2012-09-11	KU4	11	4	Red	Apterous	1	0	0	0	0	1	0		0	0	0	0	1	0	0	0	0	0	0	0	0	0	0	0	0	0	0	0	0	2	0	0	0	0	0	0	0	0
K64-4	2012-09-11	KU4	11	5	Green	Apterous	1	0	0	1	0	1	0		0	0	1	0	1	0	0	0	0	0	0	0	0	0	0	0	1	0	0	0	0	3	0	0	0	0	0	0	0	0
K64-6	2012-09-11	KU4	11	3	Green	Apterous	1	0	0	0	0	1	0		0	0	0	0	1	0	0	0	0	0	0	0	0	0	0	0	0	0	0	0	0	2	0	0	0	0	0	0	0	0
K64-7	2012-09-11	KU4	11	4	Green	Apterous	0	0	0	0	0	1	0		0	0	0	0	0	0	0	0	0	0	0	0	0	0	0	0	0	0	0	0	0	1	0	0	0	0	0	0	1	0
K64-1	2012-09-11	KU4	11	4	Green	Apterous	0	0	1	0	0	1	0		0	0	0	0	0	0	0	0	0	0	0	0	0	1	0	0	0	0	0	0	0	2	0	0	0	0	0	0	0	0
K64-10	2012-09-11	KU4	11	4	Green	Apterous	1	0	0	0	0	0	0		0	0	0	0	0	0	0	0	0	0	0	0	0	0	0	0	0	0	0	0	0	1	0	1	0	0	0	0	0	0
K64-11	2012-09-11	KU4	11	4	Green	Apterous	0	0	0	0	0	0	0		0	0	0	0	0	0	0	0	0	0	0	0	0	0	0	0	0	0	0	0	0	0	1	0	0	0	0	0	0	0
K64-12	2012-09-11	KU4	11	4	Green	Apterous	0	0	0	0	1	0	0		0	0	0	0	0	0	0	0	0	0	0	0	0	0	0	0	0	0	0	0	0	1	0	0	0	0	0	1	0	0
K64-13	2012-09-11	KU4	11	4	Red	Apterous	1	0	1	0	0	1	0		0	1	0	0	1	0	0	0	0	0	0	0	0	1	0	0	0	0	0	0	0	3	0	0	0	0	0	0	0	0
K64-18	2012-09-11	KU4	11	4	Red	Apterous	1	0	0	0	0	0	1		0	0	0	0	0	1	0	0	0	0	0	0	0	0	0	0	0	0	0	0	0	2	0	0	0	0	0	0	0	0
K64-2	2012-09-11	KU4	11	4	Green	Apterous	0	0	0	1	0	0	0		0	0	0	0	0	0	0	0	0	0	0	0	0	0	0	0	0	0	0	0	0	1	0	0	0	0	1	0	0	0
K64-20	2012-09-11	KU4	11	4	Red	Apterous	0	0	0	1	1	0	0		0	0	0	0	0	0	0	0	0	0	0	0	0	0	0	1	0	0	0	0	0	2	0	0	0	0	0	0	0	0
K64-21	2012-09-11	KU4	11	3	Red	Apterous	1	0	0	0	0	0	0		0	0	0	0	0	0	0	0	0	0	0	0	0	0	0	0	0	0	0	0	0	1	0	1	0	0	0	0	0	0
K64-3	2012-09-11	KU4	11	4	Green	Apterous	0	0	0	0	0	1	0		0	0	0	0	0	0	0	0	0	0	0	0	0	0	0	0	0	0	0	0	0	1	0	0	0	0	0	0	1	0
K64-5	2012-09-11	KU4	11	5	Green	Apterous	0	0	0	1	0	0	0		0	0	0	0	0	0	0	0	0	0	0	0	0	0	0	0	0	0	0	0	0	1	0	0	0	0	1	0	0	0
K64-8	2012-09-11	KU4	11	4	Green	Apterous	0	0	1	0	0	1	0		0	0	0	0	0	0	0	0	0	0	0	0	0	1	0	0	0	0	0	0	0	2	0	0	0	0	0	0	0	0
K64-9	2012-09-11	KU4	11	4	Green	Apterous	0	0	1	0	0	1	0		0	0	0	0	0	0	0	0	0	0	0	0	0	1	0	0	0	0	0	0	0	2	0	0	0	0	0	0	0	0
K64-14	2012-09-11	KU4	11	5	Red	Alate	0	0	0	0	0	1	0		0	0	0	0	0	0	0	0	0	0	0	0	0	0	0	0	0	0	0	0	0	1	0	0	0	0	0	0	1	0
K64-22	2012-09-11	KU4	11	2	Red	Apterous	1	0	0	0	0	1	0		0	0	0	0	1	0	0	0	0	0	0	0	0	0	0	0	0	0	0	0	0	2	0	0	0	0	0	0	0	0
K64-24	2012-09-11	KU4	11	5	Red	Apterous	1	0	0	0	0	1	0		0	0	0	0	1	0	0	0	0	0	0	0	0	0	0	0	0	0	0	0	0	2	0	0	0	0	0	0	0	0
K64-15	2012-09-11	KU4	11	3	Red	Apterous	1	0	0	0	0	0	0		0	0	0	0	0	0	0	0	0	0	0	0	0	0	0	0	0	0	0	0	0	1	0	1	0	0	0	0	0	0
K64-25	2012-09-11	KU4	11	5	Red	Apterous	1	0	0	0	0	0	0		0	0	0	0	0	0	0	0	0	0	0	0	0	0	0	0	0	0	0	0	0	1	0	1	0	0	0	0	0	0
K65-1	2012-09-11	KU5	11	5	Green	Alate	1	0	0	1	0	1	0		0	0	1	0	1	0	0	0	0	0	0	0	0	0	0	0	1	0	0	0	0	3	0	0	0	0	0	0	0	0
K65-16	2012-09-11	KU5	11	2	Red	Apterous	0	0	0	0	0	1	0		0	0	0	0	0	0	0	0	0	0	0	0	0	0	0	0	0	0	0	0	0	1	0	0	0	0	0	0	1	0
K65-21	2012-09-11	KU5	11	5	Red	Alate	1	0	0	1	0	1	0		0	0	1	0	1	0	0	0	0	0	0	0	0	0	0	0	1	0	0	0	0	3	0	0	0	0	0	0	0	0
K65-4	2012-09-11	KU5	11	5	Green	Alate	1	0	0	0	0	1	0		0	0	0	0	1	0	0	0	0	0	0	0	0	0	0	0	0	0	0	0	0	2	0	0	0	0	0	0	0	0
K65-7	2012-09-11	KU5	11	4	Green	Apterous	1	0	0	1	0	1	0		0	0	1	0	1	0	0	0	0	0	0	0	0	0	0	0	1	0	0	0	0	3	0	0	0	0	0	0	0	0
K65-14	2012-09-11	KU5	11	3	Red	Apterous	1	0	0	0	0	0	0		0	0	0	0	0	0	0	0	0	0	0	0	0	0	0	0	0	0	0	0	0	1	0	1	0	0	0	0	0	0
K65-17	2012-09-11	KU5	11	2	Red	Apterous	1	0	0	0	0	0	0		0	0	0	0	0	0	0	0	0	0	0	0	0	0	0	0	0	0	0	0	0	1	0	1	0	0	0	0	0	0
K65-19	2012-09-11	KU5	11	2	Red	Apterous	1	0	0	1	0	0	0		0	0	1	0	0	0	0	0	0	0	0	0	0	0	0	0	0	0	0	0	0	2	0	0	0	0	0	0	0	0
K65-5	2012-09-11	KU5	11	5	Green	Apterous	0	1	0	0	0	0	0		0	0	0	0	0	0	0	0	0	0	0	0	0	0	0	0	0	0	0	0	0	1	0	0	1	0	0	0	0	0
K65-6	2012-09-11	KU5	11	5	Green	Apterous	1	0	0	1	0	0	0		0	0	1	0	0	0	0	0	0	0	0	0	0	0	0	0	0	0	0	0	0	2	0	0	0	0	0	0	0	0
K65-8	2012-09-11	KU5	11	5	Green	Alate	0	1	0	0	0	0	0		0	0	0	0	0	0	0	0	0	0	0	0	0	0	0	0	0	0	0	0	0	1	0	0	1	0	0	0	0	0
K65-9	2012-09-11	KU5	11	4	Green	Apterous	0	1	0	0	0	0	0		0	0	0	0	0	0	0	0	0	0	0	0	0	0	0	0	0	0	0	0	0	1	0	0	1	0	0	0	0	0
K65-11	2012-09-11	KU5	11	5	Red	Alate	1	0	0	1	0	1	0		0	0	1	0	1	0	0	0	0	0	0	0	0	0	0	0	1	0	0	0	0	3	0	0	0	0	0	0	0	0
K65-13	2012-09-11	KU5	11	4	Red	Apterous	0	0	0	0	0	1	0		0	0	0	0	0	0	0	0	0	0	0	0	0	0	0	0	0	0	0	0	0	1	0	0	0	0	0	0	1	0
K65-18	2012-09-11	KU5	11	2	Red	Apterous	1	0	0	1	0	1	0		0	0	1	0	1	0	0	0	0	0	0	0	0	0	0	0	1	0	0	0	0	3	0	0	0	0	0	0	0	0
K65-3	2012-09-11	KU5	11	5	Green	Alate	0	0	0	0	0	1	1		0	0	0	0	0	0	0	0	0	0	0	0	0	0	0	0	0	0	0	0	1	2	0	0	0	0	0	0	0	0
K65-10	2012-09-11	KU5	11	5	Green	Alate	1	0	0	1	0	0	0		0	0	1	0	0	0	0	0	0	0	0	0	0	0	0	0	0	0	0	0	0	2	0	0	0	0	0	0	0	0
K65-12	2012-09-11	KU5	11	4	Red	Apterous	1	0	0	1	0	0	0		0	0	1	0	0	0	0	0	0	0	0	0	0	0	0	0	0	0	0	0	0	2	0	0	0	0	0	0	0	0
K65-15	2012-09-11	KU5	11	2	Red	Apterous	1	0	0	0	0	0	0		0	0	0	0	0	0	0	0	0	0	0	0	0	0	0	0	0	0	0	0	0	1	0	1	0	0	0	0	0	0
K65-2	2012-09-11	KU5	11	5	Green	Alate	1	0	0	0	0	0	0		0	0	0	0	0	0	0	0	0	0	0	0	0	0	0	0	0	0	0	0	0	1	0	1	0	0	0	0	0	0
K66-1	2012-09-11	KU6	11	5	Red	Apterous	1	0	0	0	0	1	0		0	0	0	0	1	0	0	0	0	0	0	0	0	0	0	0	0	0	0	0	0	2	0	0	0	0	0	0	0	0
K66-11	2012-09-11	KU6	11	4	Red	Apterous	0	0	0	0	0	1	1		0	0	0	0	0	0	0	0	0	0	0	0	0	0	0	0	0	0	0	0	1	2	0	0	0	0	0	0	0	0
K66-13	2012-09-11	KU6	11	5	Red	Alate	0	0	0	1	0	1	0		0	0	0	0	0	0	0	0	0	0	0	0	0	0	0	0	1	0	0	0	0	2	0	0	0	0	0	0	0	0
K66-16	2012-09-11	KU6	11	5	Green	Alate	0	0	0	0	0	1	0		0	0	0	0	0	0	0	0	0	0	0	0	0	0	0	0	0	0	0	0	0	1	0	0	0	0	0	0	1	0
K66-18	2012-09-11	KU6	11	4	Green	Apterous	0	1	0	0	0	1	0		0	0	0	0	0	0	0	0	0	1	0	0	0	0	0	0	0	0	0	0	0	2	0	0	0	0	0	0	0	0
K66-2	2012-09-11	KU6	11	4	Red	Apterous	0	0	0	1	0	1	0		0	0	0	0	0	0	0	0	0	0	0	0	0	0	0	0	1	0	0	0	0	2	0	0	0	0	0	0	0	0
K66-21	2012-09-11	KU6	11	5	Green	Apterous	0	1	0	0	0	1	0		0	0	0	0	0	0	0	0	0	1	0	0	0	0	0	0	0	0	0	0	0	2	0	0	0	0	0	0	0	0
K66-23	2012-09-11	KU6	11	1	Green	Apterous	0	0	0	0	0	1	0		0	0	0	0	0	0	0	0	0	0	0	0	0	0	0	0	0	0	0	0	0	1	0	0	0	0	0	0	1	0
K66-4	2012-09-11	KU6	11	5	Red	Apterous	0	0	0	0	0	1	0		0	0	0	0	0	0	0	0	0	0	0	0	0	0	0	0	0	0	0	0	0	1	0	0	0	0	0	0	1	0
K66-5	2012-09-11	KU6	11	5	Red	Alate	0	0	0	1	0	1	0		0	0	0	0	0	0	0	0	0	0	0	0	0	0	0	0	1	0	0	0	0	2	0	0	0	0	0	0	0	0
K66-8	2012-09-11	KU6	11	5	Red	Alate	0	0	0	0	0	1	0		0	0	0	0	0	0	0	0	0	0	0	0	0	0	0	0	0	0	0	0	0	1	0	0	0	0	0	0	1	0
K66-10	2012-09-11	KU6	11	5	Red	Alate	0	0	0	0	0	0	0		0	0	0	0	0	0	0	0	0	0	0	0	0	0	0	0	0	0	0	0	0	0	1	0	0	0	0	0	0	0
K66-12	2012-09-11	KU6	11	3	Red	Apterous	0	0	0	0	0	0	0		0	0	0	0	0	0	0	0	0	0	0	0	0	0	0	0	0	0	0	0	0	0	1	0	0	0	0	0	0	0
K66-15	2012-09-11	KU6	11	5	Green	Alate	0	0	0	0	0	0	0		0	0	0	0	0	0	0	0	0	0	0	0	0	0	0	0	0	0	0	0	0	0	1	0	0	0	0	0	0	0
K66-17	2012-09-11	KU6	11	5	Green	Alate	0	0	0	1	0	0	0		0	0	0	0	0	0	0	0	0	0	0	0	0	0	0	0	0	0	0	0	0	1	0	0	0	0	1	0	0	0
K66-19	2012-09-11	KU6	11	4	Green	Apterous	0	0	0	0	0	0	0		0	0	0	0	0	0	0	0	0	0	0	0	0	0	0	0	0	0	0	0	0	0	1	0	0	0	0	0	0	0
K66-20	2012-09-11	KU6	11	4	Green	Apterous	0	1	1	0	0	1	0		0	0	0	0	0	0	1	0	0	1	0	0	0	1	0	0	0	0	0	0	0	3	0	0	0	0	0	0	0	0
K66-22	2012-09-11	KU6	11	4	Green	Apterous	0	1	0	0	0	0	0		0	0	0	0	0	0	0	0	0	0	0	0	0	0	0	0	0	0	0	0	0	1	0	0	1	0	0	0	0	0
K66-9	2012-09-11	KU6	11	5	Red	Alate	0	0	0	1	0	0	0		0	0	0	0	0	0	0	0	0	0	0	0	0	0	0	0	0	0	0	0	0	1	0	0	0	0	1	0	0	0
K66-14	2012-09-11	KU6	11	4	Green	Apterous	1	0	0	1	0	1	0		0	0	1	0	1	0	0	0	0	0	0	0	0	0	0	0	1	0	0	0	0	3	0	0	0	0	0	0	0	0
K66-3	2012-09-11	KU6	11	5	Red	Alate	0	1	0	0	0	0	0		0	0	0	0	0	0	0	0	0	0	0	0	0	0	0	0	0	0	0	0	0	1	0	0	1	0	0	0	0	0
K66-6	2012-09-11	KU6	11	4	Red	Apterous	0	0	0	0	0	0	0		0	0	0	0	0	0	0	0	0	0	0	0	0	0	0	0	0	0	0	0	0	0	1	0	0	0	0	0	0	0
K66-7	2012-09-11	KU6	11	4	Red	Apterous	0	0	0	0	0	0	0		0	0	0	0	0	0	0	0	0	0	0	0	0	0	0	0	0	0	0	0	0	0	1	0	0	0	0	0	0	0
K67-14	2012-09-26	KU1	12	5	Red	Alate	1	0	0	0	0	1	0		0	0	0	0	1	0	0	0	0	0	0	0	0	0	0	0	0	0	0	0	0	2	0	0	0	0	0	0	0	0
K67-1	2012-09-26	KU1	12	4	Green	Apterous	0	0	0	1	0	0	0		0	0	0	0	0	0	0	0	0	0	0	0	0	0	0	0	0	0	0	0	0	1	0	0	0	0	1	0	0	0
K67-11	2012-09-26	KU1	12	4	Green	Apterous	0	0	0	0	0	0	0		0	0	0	0	0	0	0	0	0	0	0	0	0	0	0	0	0	0	0	0	0	0	1	0	0	0	0	0	0	0
K67-13	2012-09-26	KU1	12	5	Red	Apterous	0	0	0	1	0	0	0		0	0	0	0	0	0	0	0	0	0	0	0	0	0	0	0	0	0	0	0	0	1	0	0	0	0	1	0	0	0
K67-15	2012-09-26	KU1	12	5	Red	Apterous	0	0	0	1	0	1	0		0	0	0	0	0	0	0	0	0	0	0	0	0	0	0	0	1	0	0	0	0	2	0	0	0	0	0	0	0	0
K67-16	2012-09-26	KU1	12	4	Red	Apterous	1	0	0	0	0	0	0		0	0	0	0	0	0	0	0	0	0	0	0	0	0	0	0	0	0	0	0	0	1	0	1	0	0	0	0	0	0
K67-17	2012-09-26	KU1	12	5	Red	Alate	1	0	0	0	0	0	0		0	0	0	0	0	0	0	0	0	0	0	0	0	0	0	0	0	0	0	0	0	1	0	1	0	0	0	0	0	0
K67-18	2012-09-26	KU1	12	4	Red	Apterous	0	0	0	0	0	0	0		0	0	0	0	0	0	0	0	0	0	0	0	0	0	0	0	0	0	0	0	0	0	1	0	0	0	0	0	0	0
K67-19	2012-09-26	KU1	12	4	Red	Apterous	1	0	0	1	0	0	0		0	0	1	0	0	0	0	0	0	0	0	0	0	0	0	0	0	0	0	0	0	2	0	0	0	0	0	0	0	0
K67-2	2012-09-26	KU1	12	5	Green	Apterous	0	0	0	0	0	0	1		0	0	0	0	0	0	0	0	0	0	0	0	0	0	0	0	0	0	0	0	0	1	0	0	0	0	0	0	0	1
K67-20	2012-09-26	KU1	12	5	Red	Apterous	1	0	0	0	1	0	0		0	0	0	1	0	0	0	0	0	0	0	0	0	0	0	0	0	0	0	0	0	2	0	0	0	0	0	0	0	0
K67-21	2012-09-26	KU1	12	4	Red	Apterous	0	0	0	1	0	0	0		0	0	0	0	0	0	0	0	0	0	0	0	0	0	0	0	0	0	0	0	0	1	0	0	0	0	1	0	0	0
K67-22	2012-09-26	KU1	12	5	Red	Apterous	1	1	0	0	0	0	0		1	0	0	0	0	0	0	0	0	0	0	0	0	0	0	0	0	0	0	0	0	2	0	0	0	0	0	0	0	0
K67-23	2012-09-26	KU1	12	4	Red	Apterous	0	0	0	0	0	0	0		0	0	0	0	0	0	0	0	0	0	0	0	0	0	0	0	0	0	0	0	0	0	1	0	0	0	0	0	0	0
K67-3	2012-09-26	KU1	12	4	Green	Apterous	0	0	0	1	0	0	0		0	0	0	0	0	0	0	0	0	0	0	0	0	0	0	0	0	0	0	0	0	1	0	0	0	0	1	0	0	0
K67-4	2012-09-26	KU1	12	4	Green	Apterous	0	0	0	0	0	0	0		0	0	0	0	0	0	0	0	0	0	0	0	0	0	0	0	0	0	0	0	0	0	1	0	0	0	0	0	0	0
K67-8	2012-09-26	KU1	12	4	Green	Apterous	1	0	0	1	0	0	0		0	0	1	0	0	0	0	0	0	0	0	0	0	0	0	0	0	0	0	0	0	2	0	0	0	0	0	0	0	0
K67-9	2012-09-26	KU1	12	4	Green	Apterous	0	0	0	0	0	0	0		0	0	0	0	0	0	0	0	0	0	0	0	0	0	0	0	0	0	0	0	0	0	1	0	0	0	0	0	0	0
K67-10	2012-09-26	KU1	12	5	Green	Apterous	0	0	0	1	0	0	0		0	0	0	0	0	0	0	0	0	0	0	0	0	0	0	0	0	0	0	0	0	1	0	0	0	0	1	0	0	0
K67-12	2012-09-26	KU1	12	4	Green	Apterous	0	1	0	0	0	0	0		0	0	0	0	0	0	0	0	0	0	0	0	0	0	0	0	0	0	0	0	0	1	0	0	1	0	0	0	0	0
K67-24	2012-09-26	KU1	12	3	Red	Apterous	0	0	0	0	0	0	0		0	0	0	0	0	0	0	0	0	0	0	0	0	0	0	0	0	0	0	0	0	0	1	0	0	0	0	0	0	0
K67-5	2012-09-26	KU1	12	5	Green	Alate	1	1	0	0	0	0	1		1	0	0	0	0	1	0	0	0	0	1	0	0	0	0	0	0	0	0	0	0	3	0	0	0	0	0	0	0	0
K67-6	2012-09-26	KU1	12	5	Green	Apterous	1	0	0	0	0	0	1		0	0	0	0	0	1	0	0	0	0	0	0	0	0	0	0	0	0	0	0	0	2	0	0	0	0	0	0	0	0
K67-7	2012-09-26	KU1	12	4	Green	Apterous	0	0	0	0	0	0	0		0	0	0	0	0	0	0	0	0	0	0	0	0	0	0	0	0	0	0	0	0	0	1	0	0	0	0	0	0	0
K68-1	2012-09-26	KU2	12	4	Green	Apterous	0	1	1	0	0	1	0		0	0	0	0	0	0	1	0	0	1	0	0	0	1	0	0	0	0	0	0	0	3	0	0	0	0	0	0	0	0
K68-13	2012-09-26	KU2	12	5	Red	Alate	1	1	0	0	0	0	0		1	0	0	0	0	0	0	0	0	0	0	0	0	0	0	0	0	0	0	0	0	2	0	0	0	0	0	0	0	0
K68-14	2012-09-26	KU2	12	5	Red	Alate	1	0	0	0	0	0	0		0	0	0	0	0	0	0	0	0	0	0	0	0	0	0	0	0	0	0	0	0	1	0	1	0	0	0	0	0	0
K68-16	2012-09-26	KU2	12	5	Red	Alate	1	0	0	0	0	0	0		0	0	0	0	0	0	0	0	0	0	0	0	0	0	0	0	0	0	0	0	0	1	0	1	0	0	0	0	0	0
K68-18	2012-09-26	KU2	12	3	Red	Apterous	1	0	0	0	0	0	0		0	0	0	0	0	0	0	0	0	0	0	0	0	0	0	0	0	0	0	0	0	1	0	1	0	0	0	0	0	0
K68-19	2012-09-26	KU2	12	3	Red	Apterous	1	0	0	0	0	0	0		0	0	0	0	0	0	0	0	0	0	0	0	0	0	0	0	0	0	0	0	0	1	0	1	0	0	0	0	0	0
K68-20	2012-09-26	KU2	12	4	Red	Apterous	1	0	0	0	0	0	0		0	0	0	0	0	0	0	0	0	0	0	0	0	0	0	0	0	0	0	0	0	1	0	1	0	0	0	0	0	0
K68-21	2012-09-26	KU2	12	3	Red	Apterous	1	0	0	0	1	0	0		0	0	0	1	0	0	0	0	0	0	0	0	0	0	0	0	0	0	0	0	0	2	0	0	0	0	0	0	0	0
K68-22	2012-09-26	KU2	12	5	Red	Alate	1	0	0	0	0	0	1		0	0	0	0	0	1	0	0	0	0	0	0	0	0	0	0	0	0	0	0	0	2	0	0	0	0	0	0	0	0
K68-23	2012-09-26	KU2	12	4	Red	Apterous	0	0	0	0	0	0	0		0	0	0	0	0	0	0	0	0	0	0	0	0	0	0	0	0	0	0	0	0	0	1	0	0	0	0	0	0	0
K68-24	2012-09-26	KU2	12	4	Red	Apterous	1	0	0	1	0	0	0		0	0	1	0	0	0	0	0	0	0	0	0	0	0	0	0	0	0	0	0	0	2	0	0	0	0	0	0	0	0
K68-3	2012-09-26	KU2	12	4	Green	Apterous	0	1	0	0	0	0	0		0	0	0	0	0	0	0	0	0	0	0	0	0	0	0	0	0	0	0	0	0	1	0	0	1	0	0	0	0	0
K68-4	2012-09-26	KU2	12	4	Green	Apterous	0	0	1	0	0	1	0		0	0	0	0	0	0	0	0	0	0	0	0	0	1	0	0	0	0	0	0	0	2	0	0	0	0	0	0	0	0
K68-5	2012-09-26	KU2	12	5	Green	Apterous	0	0	1	0	0	1	0		0	0	0	0	0	0	0	0	0	0	0	0	0	1	0	0	0	0	0	0	0	2	0	0	0	0	0	0	0	0
K68-6	2012-09-26	KU2	12	5	Green	Apterous	0	0	0	1	0	1	0		0	0	0	0	0	0	0	0	0	0	0	0	0	0	0	0	1	0	0	0	0	2	0	0	0	0	0	0	0	0
K68-7	2012-09-26	KU2	12	4	Green	Apterous	0	0	1	0	0	1	0		0	0	0	0	0	0	0	0	0	0	0	0	0	1	0	0	0	0	0	0	0	2	0	0	0	0	0	0	0	0
K68-10	2012-09-26	KU2	12	4	Green	Apterous	0	0	0	0	0	0	0		0	0	0	0	0	0	0	0	0	0	0	0	0	0	0	0	0	0	0	0	0	0	1	0	0	0	0	0	0	0
K68-11	2012-09-26	KU2	12	5	Green	Alate	0	0	0	0	0	0	1		0	0	0	0	0	0	0	0	0	0	0	0	0	0	0	0	0	0	0	0	0	1	0	0	0	0	0	0	0	1
K68-12	2012-09-26	KU2	12	4	Green	Apterous	1	0	0	1	0	0	0		0	0	1	0	0	0	0	0	0	0	0	0	0	0	0	0	0	0	0	0	0	2	0	0	0	0	0	0	0	0
K68-15	2012-09-26	KU2	12	5	Red	Alate	1	0	0	1	0	0	0		0	0	1	0	0	0	0	0	0	0	0	0	0	0	0	0	0	0	0	0	0	2	0	0	0	0	0	0	0	0
K68-17	2012-09-26	KU2	12	5	Red	Alate	1	0	0	1	0	0	0		0	0	1	0	0	0	0	0	0	0	0	0	0	0	0	0	0	0	0	0	0	2	0	0	0	0	0	0	0	0
K68-2	2012-09-26	KU2	12	5	Green	Alate	0	0	0	0	0	0	0		0	0	0	0	0	0	0	0	0	0	0	0	0	0	0	0	0	0	0	0	0	0	1	0	0	0	0	0	0	0
K68-8	2012-09-26	KU2	12	4	Green	Apterous	0	1	0	0	0	0	0		0	0	0	0	0	0	0	0	0	0	0	0	0	0	0	0	0	0	0	0	0	1	0	0	1	0	0	0	0	0
K68-9	2012-09-26	KU2	12	4	Green	Apterous	1	0	0	0	0	0	0		0	0	0	0	0	0	0	0	0	0	0	0	0	0	0	0	0	0	0	0	0	1	0	1	0	0	0	0	0	0
K69-13	2012-09-26	KU3	12	5	Red	Alate	0	0	0	0	0	1	0		0	0	0	0	0	0	0	0	0	0	0	0	0	0	0	0	0	0	0	0	0	1	0	0	0	0	0	0	1	0
K69-18	2012-09-26	KU3	12	5	Red	Alate	0	0	0	0	0	1	0		0	0	0	0	0	0	0	0	0	0	0	0	0	0	0	0	0	0	0	0	0	1	0	0	0	0	0	0	1	0
K69-2	2012-09-26	KU3	12	5	Green	Alate	1	0	1	1	0	1	0		0	1	1	0	1	0	0	0	0	0	0	1	0	1	0	0	1	0	0	0	0	4	0	0	0	0	0	0	0	0
K69-7	2012-09-26	KU3	12	5	Green	Alate	0	0	0	1	0	1	0		0	0	0	0	0	0	0	0	0	0	0	0	0	0	0	0	1	0	0	0	0	2	0	0	0	0	0	0	0	0
K69-1	2012-09-26	KU3	12	4	Green	Apterous	0	0	0	1	0	0	0		0	0	0	0	0	0	0	0	0	0	0	0	0	0	0	0	0	0	0	0	0	1	0	0	0	0	1	0	0	0
K69-10	2012-09-26	KU3	12	4	Green	Apterous	1	0	1	0	0	0	0		0	1	0	0	0	0	0	0	0	0	0	0	0	0	0	0	0	0	0	0	0	2	0	0	0	0	0	0	0	0
K69-11	2012-09-26	KU3	12	5	Green	Alate	0	0	0	0	0	0	0		0	0	0	0	0	0	0	0	0	0	0	0	0	0	0	0	0	0	0	0	0	0	1	0	0	0	0	0	0	0
K69-12	2012-09-26	KU3	12	5	Green	Alate	1	0	1	1	0	0	0		0	1	1	0	0	0	0	0	0	0	0	1	0	0	0	0	0	0	0	0	0	3	0	0	0	0	0	0	0	0
K69-14	2012-09-26	KU3	12	5	Red	Alate	1	0	1	0	0	1	0		0	1	0	0	1	0	0	0	0	0	0	0	0	1	0	0	0	0	0	0	0	3	0	0	0	0	0	0	0	0
K69-15	2012-09-26	KU3	12	5	Red	Alate	0	0	0	0	0	1	0		0	0	0	0	0	0	0	0	0	0	0	0	0	0	0	0	0	0	0	0	0	1	0	0	0	0	0	0	1	0
K69-17	2012-09-26	KU3	12	4	Red	Apterous	0	0	0	1	0	0	0		0	0	0	0	0	0	0	0	0	0	0	0	0	0	0	0	0	0	0	0	0	1	0	0	0	0	1	0	0	0
K69-19	2012-09-26	KU3	12	5	Red	Alate	0	0	0	0	0	1	0		0	0	0	0	0	0	0	0	0	0	0	0	0	0	0	0	0	0	0	0	0	1	0	0	0	0	0	0	1	0
K69-22	2012-09-26	KU3	12	4	Red	Apterous	0	0	1	0	0	1	0		0	0	0	0	0	0	0	0	0	0	0	0	0	1	0	0	0	0	0	0	0	2	0	0	0	0	0	0	0	0
K69-23	2012-09-26	KU3	12	3	Red	Apterous	0	0	0	0	0	1	0		0	0	0	0	0	0	0	0	0	0	0	0	0	0	0	0	0	0	0	0	0	1	0	0	0	0	0	0	1	0
K69-24	2012-09-26	KU3	12	5	Red	Alate	0	0	0	0	0	0	0		0	0	0	0	0	0	0	0	0	0	0	0	0	0	0	0	0	0	0	0	0	0	1	0	0	0	0	0	0	0
K69-5	2012-09-26	KU3	12	3	Green	Apterous	1	0	0	0	0	0	0		0	0	0	0	0	0	0	0	0	0	0	0	0	0	0	0	0	0	0	0	0	1	0	1	0	0	0	0	0	0
K69-6	2012-09-26	KU3	12	5	Green	Alate	1	0	0	1	0	0	0		0	0	1	0	0	0	0	0	0	0	0	0	0	0	0	0	0	0	0	0	0	2	0	0	0	0	0	0	0	0
K69-8	2012-09-26	KU3	12	5	Green	Alate	1	0	0	0	0	0	0		0	0	0	0	0	0	0	0	0	0	0	0	0	0	0	0	0	0	0	0	0	1	0	1	0	0	0	0	0	0
K69-9	2012-09-26	KU3	12	4	Green	Apterous	1	0	0	1	0	0	0		0	0	1	0	0	0	0	0	0	0	0	0	0	0	0	0	0	0	0	0	0	2	0	0	0	0	0	0	0	0
K69-16	2012-09-26	KU3	12	4	Red	Apterous	1	0	0	1	0	0	0		0	0	1	0	0	0	0	0	0	0	0	0	0	0	0	0	0	0	0	0	0	2	0	0	0	0	0	0	0	0
K69-20	2012-09-26	KU3	12	5	Red	Apterous	1	0	0	1	0	0	0		0	0	1	0	0	0	0	0	0	0	0	0	0	0	0	0	0	0	0	0	0	2	0	0	0	0	0	0	0	0
K69-21	2012-09-26	KU3	12	5	Red	Alate	1	1	0	0	0	0	0		1	0	0	0	0	0	0	0	0	0	0	0	0	0	0	0	0	0	0	0	0	2	0	0	0	0	0	0	0	0
K69-3	2012-09-26	KU3	12	5	Green	Alate	1	0	0	0	0	1	0		0	0	0	0	1	0	0	0	0	0	0	0	0	0	0	0	0	0	0	0	0	2	0	0	0	0	0	0	0	0
K69-4	2012-09-26	KU3	12	5	Green	Alate	1	0	0	0	0	0	0		0	0	0	0	0	0	0	0	0	0	0	0	0	0	0	0	0	0	0	0	0	1	0	1	0	0	0	0	0	0
K70-5	2012-09-26	KU4	12	5	Green	Alate	0	0	0	0	0	1	0		0	0	0	0	0	0	0	0	0	0	0	0	0	0	0	0	0	0	0	0	0	1	0	0	0	0	0	0	1	0
K70-1	2012-09-26	KU4	12	5	Green	Apterous	0	0	1	0	0	1	0		0	0	0	0	0	0	0	0	0	0	0	0	0	1	0	0	0	0	0	0	0	2	0	0	0	0	0	0	0	0
K70-10	2012-09-26	KU4	12	5	Green	Alate	0	1	0	0	0	0	0		0	0	0	0	0	0	0	0	0	0	0	0	0	0	0	0	0	0	0	0	0	1	0	0	1	0	0	0	0	0
K70-11	2012-09-26	KU4	12	4	Green	Apterous	1	1	0	0	0	1	0		1	0	0	0	1	0	0	0	0	1	0	0	0	0	0	0	0	0	0	0	0	3	0	0	0	0	0	0	0	0
K70-12	2012-09-26	KU4	12	5	Green	Alate	0	0	0	0	0	1	0		0	0	0	0	0	0	0	0	0	0	0	0	0	0	0	0	0	0	0	0	0	1	0	0	0	0	0	0	1	0
K70-13	2012-09-26	KU4	12	4	Red	Apterous	1	1	0	0	0	0	0		1	0	0	0	0	0	0	0	0	0	0	0	0	0	0	0	0	0	0	0	0	2	0	0	0	0	0	0	0	0
K70-14	2012-09-26	KU4	12	5	Red	Alate	1	0	0	0	0	0	0		0	0	0	0	0	0	0	0	0	0	0	0	0	0	0	0	0	0	0	0	0	1	0	1	0	0	0	0	0	0
K70-15	2012-09-26	KU4	12	5	Red	Apterous	1	0	0	1	0	0	0		0	0	1	0	0	0	0	0	0	0	0	0	0	0	0	0	0	0	0	0	0	2	0	0	0	0	0	0	0	0
K70-16	2012-09-26	KU4	12	5	Red	Alate	1	0	0	0	0	0	0		0	0	0	0	0	0	0	0	0	0	0	0	0	0	0	0	0	0	0	0	0	1	0	1	0	0	0	0	0	0
K70-17	2012-09-26	KU4	12	5	Red	Alate	1	0	0	0	0	0	0		0	0	0	0	0	0	0	0	0	0	0	0	0	0	0	0	0	0	0	0	0	1	0	1	0	0	0	0	0	0
K70-18	2012-09-26	KU4	12	5	Red	Apterous	1	0	0	1	1	0	0		0	0	1	1	0	0	0	0	0	0	0	0	0	0	0	1	0	0	0	0	0	3	0	0	0	0	0	0	0	0
K70-19	2012-09-26	KU4	12	4	Red	Apterous	1	0	0	1	0	0	0		0	0	1	0	0	0	0	0	0	0	0	0	0	0	0	0	0	0	0	0	0	2	0	0	0	0	0	0	0	0
K70-2	2012-09-26	KU4	12	5	Green	Alate	0	1	0	0	0	1	0		0	0	0	0	0	0	0	0	0	1	0	0	0	0	0	0	0	0	0	0	0	2	0	0	0	0	0	0	0	0
K70-20	2012-09-26	KU4	12	5	Red	Alate	1	1	0	0	0	0	0		1	0	0	0	0	0	0	0	0	0	0	0	0	0	0	0	0	0	0	0	0	2	0	0	0	0	0	0	0	0
K70-21	2012-09-26	KU4	12	5	Red	Alate	1	0	0	1	0	0	0		0	0	1	0	0	0	0	0	0	0	0	0	0	0	0	0	0	0	0	0	0	2	0	0	0	0	0	0	0	0
K70-22	2012-09-26	KU4	12	5	Red	Alate	1	0	0	1	0	0	0		0	0	1	0	0	0	0	0	0	0	0	0	0	0	0	0	0	0	0	0	0	2	0	0	0	0	0	0	0	0
K70-23	2012-09-26	KU4	12	4	Red	Apterous	1	0	0	1	0	0	0		0	0	1	0	0	0	0	0	0	0	0	0	0	0	0	0	0	0	0	0	0	2	0	0	0	0	0	0	0	0
K70-24	2012-09-26	KU4	12	5	Red	Alate	1	0	0	0	0	0	0		0	0	0	0	0	0	0	0	0	0	0	0	0	0	0	0	0	0	0	0	0	1	0	1	0	0	0	0	0	0
K70-3	2012-09-26	KU4	12	5	Green	Apterous	0	0	1	0	0	1	1		0	0	0	0	0	0	0	0	0	0	0	0	0	1	1	0	0	0	0	0	1	3	0	0	0	0	0	0	0	0
K70-4	2012-09-26	KU4	12	5	Green	Alate	0	0	0	0	0	1	0		0	0	0	0	0	0	0	0	0	0	0	0	0	0	0	0	0	0	0	0	0	1	0	0	0	0	0	0	1	0
K70-6	2012-09-26	KU4	12	5	Green	Alate	1	0	0	1	0	0	0		0	0	1	0	0	0	0	0	0	0	0	0	0	0	0	0	0	0	0	0	0	2	0	0	0	0	0	0	0	0
K70-7	2012-09-26	KU4	12	5	Green	Alate	0	0	0	0	0	0	0		0	0	0	0	0	0	0	0	0	0	0	0	0	0	0	0	0	0	0	0	0	0	1	0	0	0	0	0	0	0
K70-8	2012-09-26	KU4	12	5	Green	Alate	1	1	0	0	0	0	0		1	0	0	0	0	0	0	0	0	0	0	0	0	0	0	0	0	0	0	0	0	2	0	0	0	0	0	0	0	0
K70-9	2012-09-26	KU4	12	5	Green	Apterous	0	0	1	0	0	1	0		0	0	0	0	0	0	0	0	0	0	0	0	0	1	0	0	0	0	0	0	0	2	0	0	0	0	0	0	0	0
K71-10	2012-09-26	KU5	12	5	Green	Apterous	1	0	0	0	0	1	0		0	0	0	0	1	0	0	0	0	0	0	0	0	0	0	0	0	0	0	0	0	2	0	0	0	0	0	0	0	0
K71-11	2012-09-26	KU5	12	4	Green	Apterous	0	1	0	0	0	1	0		0	0	0	0	0	0	0	0	0	1	0	0	0	0	0	0	0	0	0	0	0	2	0	0	0	0	0	0	0	0
K71-18	2012-09-26	KU5	12	4	Red	Apterous	1	0	0	0	0	1	0		0	0	0	0	1	0	0	0	0	0	0	0	0	0	0	0	0	0	0	0	0	2	0	0	0	0	0	0	0	0
K71-20	2012-09-26	KU5	12	4	Red	Apterous	0	0	0	0	0	1	0		0	0	0	0	0	0	0	0	0	0	0	0	0	0	0	0	0	0	0	0	0	1	0	0	0	0	0	0	1	0
K71-5	2012-09-26	KU5	12	3	Green	Apterous	0	1	0	0	0	1	0		0	0	0	0	0	0	0	0	0	1	0	0	0	0	0	0	0	0	0	0	0	2	0	0	0	0	0	0	0	0
K71-6	2012-09-26	KU5	12	4	Green	Apterous	0	1	0	0	0	1	0		0	0	0	0	0	0	0	0	0	1	0	0	0	0	0	0	0	0	0	0	0	2	0	0	0	0	0	0	0	0
K71-7	2012-09-26	KU5	12	5	Green	Alate	1	0	0	1	0	1	0		0	0	1	0	1	0	0	0	0	0	0	0	0	0	0	0	1	0	0	0	0	3	0	0	0	0	0	0	0	0
K71-1	2012-09-26	KU5	12	4	Green	Apterous	1	0	0	0	0	0	0		0	0	0	0	0	0	0	0	0	0	0	0	0	0	0	0	0	0	0	0	0	1	0	1	0	0	0	0	0	0
K71-13	2012-09-26	KU5	12	5	Red	Apterous	0	0	0	0	0	0	0		0	0	0	0	0	0	0	0	0	0	0	0	0	0	0	0	0	0	0	0	0	0	1	0	0	0	0	0	0	0
K71-14	2012-09-26	KU5	12	3	Red	Apterous	0	0	0	0	0	0	1		0	0	0	0	0	0	0	0	0	0	0	0	0	0	0	0	0	0	0	0	0	1	0	0	0	0	0	0	0	1
K71-15	2012-09-26	KU5	12	4	Red	Apterous	0	0	0	0	0	0	1		0	0	0	0	0	0	0	0	0	0	0	0	0	0	0	0	0	0	0	0	0	1	0	0	0	0	0	0	0	1
K71-16	2012-09-26	KU5	12	3	Red	Apterous	0	0	0	1	0	0	0		0	0	0	0	0	0	0	0	0	0	0	0	0	0	0	0	0	0	0	0	0	1	0	0	0	0	1	0	0	0
K71-19	2012-09-26	KU5	12	4	Red	Apterous	1	0	0	0	0	0	0		0	0	0	0	0	0	0	0	0	0	0	0	0	0	0	0	0	0	0	0	0	1	0	1	0	0	0	0	0	0
K71-2	2012-09-26	KU5	12	5	Green	Alate	0	0	0	1	0	0	0		0	0	0	0	0	0	0	0	0	0	0	0	0	0	0	0	0	0	0	0	0	1	0	0	0	0	1	0	0	0
K71-21	2012-09-26	KU5	12	5	Red	Apterous	1	0	0	0	0	0	0		0	0	0	0	0	0	0	0	0	0	0	0	0	0	0	0	0	0	0	0	0	1	0	1	0	0	0	0	0	0
K71-22	2012-09-26	KU5	12	4	Red	Apterous	1	0	0	0	0	0	1		0	0	0	0	0	1	0	0	0	0	0	0	0	0	0	0	0	0	0	0	0	2	0	0	0	0	0	0	0	0
K71-23	2012-09-26	KU5	12	5	Red	Apterous	1	0	0	0	0	0	0		0	0	0	0	0	0	0	0	0	0	0	0	0	0	0	0	0	0	0	0	0	1	0	1	0	0	0	0	0	0
K71-24	2012-09-26	KU5	12	5	Red	Apterous	0	0	0	1	0	1	0		0	0	0	0	0	0	0	0	0	0	0	0	0	0	0	0	1	0	0	0	0	2	0	0	0	0	0	0	0	0
K71-3	2012-09-26	KU5	12	3	Green	Apterous	1	1	0	0	0	1	0		1	0	0	0	1	0	0	0	0	1	0	0	0	0	0	0	0	0	0	0	0	3	0	0	0	0	0	0	0	0
K71-4	2012-09-26	KU5	12	4	Green	Apterous	0	0	1	0	0	1	0		0	0	0	0	0	0	0	0	0	0	0	0	0	1	0	0	0	0	0	0	0	2	0	0	0	0	0	0	0	0
K71-8	2012-09-26	KU5	12	3	Green	Apterous	1	1	0	0	0	0	0		1	0	0	0	0	0	0	0	0	0	0	0	0	0	0	0	0	0	0	0	0	2	0	0	0	0	0	0	0	0
K71-9	2012-09-26	KU5	12	3	Green	Apterous	0	1	0	0	0	0	0		0	0	0	0	0	0	0	0	0	0	0	0	0	0	0	0	0	0	0	0	0	1	0	0	1	0	0	0	0	0
K71-12	2012-09-26	KU5	12	5	Green	Apterous	0	0	0	0	0	0	1		0	0	0	0	0	0	0	0	0	0	0	0	0	0	0	0	0	0	0	0	0	1	0	0	0	0	0	0	0	1
K71-17	2012-09-26	KU5	12	3	Red	Apterous	1	0	0	0	0	0	0		0	0	0	0	0	0	0	0	0	0	0	0	0	0	0	0	0	0	0	0	0	1	0	1	0	0	0	0	0	0
K72-11	2012-09-26	KU6	12	4	Green	Apterous	0	1	0	0	0	1	0		0	0	0	0	0	0	0	0	0	1	0	0	0	0	0	0	0	0	0	0	0	2	0	0	0	0	0	0	0	0
K72-12	2012-09-26	KU6	12	3	Green	Apterous	0	0	0	0	0	1	0		0	0	0	0	0	0	0	0	0	0	0	0	0	0	0	0	0	0	0	0	0	1	0	0	0	0	0	0	1	0
K72-14	2012-09-26	KU6	12	5	Red	Apterous	1	0	0	0	0	1	0		0	0	0	0	1	0	0	0	0	0	0	0	0	0	0	0	0	0	0	0	0	2	0	0	0	0	0	0	0	0
K72-17	2012-09-26	KU6	12	5	Red	Alate	1	0	0	0	1	1	0		0	0	0	1	1	0	0	0	0	0	0	0	0	0	0	0	0	0	1	0	0	3	0	0	0	0	0	0	0	0
K72-20	2012-09-26	KU6	12	4	Red	Apterous	0	0	0	0	0	1	0		0	0	0	0	0	0	0	0	0	0	0	0	0	0	0	0	0	0	0	0	0	1	0	0	0	0	0	0	1	0
K72-21	2012-09-26	KU6	12	3	Red	Apterous	1	0	0	0	0	1	0		0	0	0	0	1	0	0	0	0	0	0	0	0	0	0	0	0	0	0	0	0	2	0	0	0	0	0	0	0	0
K72-3	2012-09-26	KU6	12	4	Green	Apterous	0	0	1	0	0	1	0		0	0	0	0	0	0	0	0	0	0	0	0	0	1	0	0	0	0	0	0	0	2	0	0	0	0	0	0	0	0
K72-4	2012-09-26	KU6	12	5	Green	Apterous	1	0	0	0	0	1	0		0	0	0	0	1	0	0	0	0	0	0	0	0	0	0	0	0	0	0	0	0	2	0	0	0	0	0	0	0	0
K72-5	2012-09-26	KU6	12	5	Green	Alate	1	0	0	1	0	1	0		0	0	1	0	1	0	0	0	0	0	0	0	0	0	0	0	1	0	0	0	0	3	0	0	0	0	0	0	0	0
K72-10	2012-09-26	KU6	12	4	Green	Apterous	0	1	0	0	0	0	0		0	0	0	0	0	0	0	0	0	0	0	0	0	0	0	0	0	0	0	0	0	1	0	0	1	0	0	0	0	0
K72-13	2012-09-26	KU6	12	5	Red	Apterous	1	1	0	1	0	0	0		1	0	1	0	0	0	0	1	0	0	0	0	0	0	0	0	0	0	0	0	0	3	0	0	0	0	0	0	0	0
K72-16	2012-09-26	KU6	12	4	Red	Apterous	0	0	0	0	0	0	1		0	0	0	0	0	0	0	0	0	0	0	0	0	0	0	0	0	0	0	0	0	1	0	0	0	0	0	0	0	1
K72-18	2012-09-26	KU6	12	5	Red	Alate	0	0	0	0	0	0	1		0	0	0	0	0	0	0	0	0	0	0	0	0	0	0	0	0	0	0	0	0	1	0	0	0	0	0	0	0	1
K72-19	2012-09-26	KU6	12	3	Red	Apterous	1	0	0	0	0	0	0		0	0	0	0	0	0	0	0	0	0	0	0	0	0	0	0	0	0	0	0	0	1	0	1	0	0	0	0	0	0
K72-2	2012-09-26	KU6	12	4	Green	Apterous	0	0	0	0	0	0	0		0	0	0	0	0	0	0	0	0	0	0	0	0	0	0	0	0	0	0	0	0	0	1	0	0	0	0	0	0	0
K72-22	2012-09-26	KU6	12	4	Red	Apterous	1	0	0	1	0	1	0		0	0	1	0	1	0	0	0	0	0	0	0	0	0	0	0	1	0	0	0	0	3	0	0	0	0	0	0	0	0
K72-23	2012-09-26	KU6	12	3	Red	Apterous	1	0	0	0	0	0	0		0	0	0	0	0	0	0	0	0	0	0	0	0	0	0	0	0	0	0	0	0	1	0	1	0	0	0	0	0	0
K72-24	2012-09-26	KU6	12	4	Red	Apterous	1	0	0	1	0	0	0		0	0	1	0	0	0	0	0	0	0	0	0	0	0	0	0	0	0	0	0	0	2	0	0	0	0	0	0	0	0
K72-6	2012-09-26	KU6	12	5	Green	Apterous	0	0	0	0	0	1	0		0	0	0	0	0	0	0	0	0	0	0	0	0	0	0	0	0	0	0	0	0	1	0	0	0	0	0	0	1	0
K72-7	2012-09-26	KU6	12	5	Green	Alate	1	0	0	1	0	0	0		0	0	1	0	0	0	0	0	0	0	0	0	0	0	0	0	0	0	0	0	0	2	0	0	0	0	0	0	0	0
K72-8	2012-09-26	KU6	12	4	Green	Apterous	1	0	0	1	0	0	0		0	0	1	0	0	0	0	0	0	0	0	0	0	0	0	0	0	0	0	0	0	2	0	0	0	0	0	0	0	0
K72-9	2012-09-26	KU6	12	5	Green	Apterous	1	1	0	0	0	0	0		1	0	0	0	0	0	0	0	0	0	0	0	0	0	0	0	0	0	0	0	0	2	0	0	0	0	0	0	0	0
K72-1	2012-09-26	KU6	12	5	Green	Apterous	1	0	0	1	0	0	0		0	0	1	0	0	0	0	0	0	0	0	0	0	0	0	0	0	0	0	0	0	2	0	0	0	0	0	0	0	0
K72-15	2012-09-26	KU6	12	5	Red	Alate	1	0	0	1	0	0	0		0	0	1	0	0	0	0	0	0	0	0	0	0	0	0	0	0	0	0	0	0	2	0	0	0	0	0	0	0	0
K73-1	2012-10-10	KU1	13	5	Green	Apterous	1	1	0	0	0	0	0		1	0	0	0	0	0	0	0	0	0	0	0	0	0	0	0	0	0	0	0	0	2	0	0	0	0	0	0	0	0
K73-10	2012-10-10	KU1	13	4	Green	Apterous	0	0	0	1	0	0	0		0	0	0	0	0	0	0	0	0	0	0	0	0	0	0	0	0	0	0	0	0	1	0	0	0	0	1	0	0	0
K73-11	2012-10-10	KU1	13	5	Green	Apterous	0	0	0	1	0	1	0		0	0	0	0	0	0	0	0	0	0	0	0	0	0	0	0	1	0	0	0	0	2	0	0	0	0	0	0	0	0
K73-14	2012-10-10	KU1	13	4	Red	Apterous	1	0	1	0	0	0	1		0	1	0	0	0	1	0	0	0	0	0	0	0	0	1	0	0	0	0	0	0	3	0	0	0	0	0	0	0	0
K73-17	2012-10-10	KU1	13	4	Red	Apterous	1	1	1	0	0	1	0		1	1	0	0	1	0	1	0	0	1	0	0	0	1	0	0	0	0	0	0	0	4	0	0	0	0	0	0	0	0
K73-18	2012-10-10	KU1	13	4	Red	Apterous	1	0	1	1	0	0	0		0	1	1	0	0	0	0	0	0	0	0	1	0	0	0	0	0	0	0	0	0	3	0	0	0	0	0	0	0	0
K73-19	2012-10-10	KU1	13	3	Red	Apterous	1	0	0	1	0	0	0		0	0	1	0	0	0	0	0	0	0	0	0	0	0	0	0	0	0	0	0	0	2	0	0	0	0	0	0	0	0
K73-21	2012-10-10	KU1	13	3	Red	Apterous	0	0	1	0	0	1	0		0	0	0	0	0	0	0	0	0	0	0	0	0	1	0	0	0	0	0	0	0	2	0	0	0	0	0	0	0	0
K73-24	2012-10-10	KU1	13	3	Red	Apterous	0	0	0	1	0	1	0		0	0	0	0	0	0	0	0	0	0	0	0	0	0	0	0	1	0	0	0	0	2	0	0	0	0	0	0	0	0
K73-3	2012-10-10	KU1	13	5	Green	Apterous	0	1	0	0	0	0	0		0	0	0	0	0	0	0	0	0	0	0	0	0	0	0	0	0	0	0	0	0	1	0	0	1	0	0	0	0	0
K73-4	2012-10-10	KU1	13	5	Green	Apterous	1	0	0	1	0	0	0		0	0	1	0	0	0	0	0	0	0	0	0	0	0	0	0	0	0	0	0	0	2	0	0	0	0	0	0	0	0
K73-6	2012-10-10	KU1	13	5	Green	Apterous	0	0	1	0	0	1	0		0	0	0	0	0	0	0	0	0	0	0	0	0	1	0	0	0	0	0	0	0	2	0	0	0	0	0	0	0	0
K73-7	2012-10-10	KU1	13	3	Green	Apterous	1	1	0	0	0	0	0		1	0	0	0	0	0	0	0	0	0	0	0	0	0	0	0	0	0	0	0	0	2	0	0	0	0	0	0	0	0
K73-8	2012-10-10	KU1	13	4	Green	Apterous	0	1	0	1	0	0	0		0	0	0	0	0	0	0	1	0	0	0	0	0	0	0	0	0	0	0	0	0	2	0	0	0	0	0	0	0	0
K73-12	2012-10-10	KU1	13	5	Green	Alate	1	0	0	0	1	0	1		0	0	0	1	0	1	0	0	0	0	0	0	0	0	0	0	0	0	0	1	0	3	0	0	0	0	0	0	0	0
K73-13	2012-10-10	KU1	13	5	Green	Apterous	0	0	0	0	0	0	1		0	0	0	0	0	0	0	0	0	0	0	0	0	0	0	0	0	0	0	0	0	1	0	0	0	0	0	0	0	1
K73-15	2012-10-10	KU1	13	5	Red	Apterous	1	0	0	0	0	0	0		0	0	0	0	0	0	0	0	0	0	0	0	0	0	0	0	0	0	0	0	0	1	0	1	0	0	0	0	0	0
K73-16	2012-10-10	KU1	13	3	Red	Apterous	0	0	1	0	0	0	1		0	0	0	0	0	0	0	0	0	0	0	0	0	0	1	0	0	0	0	0	0	2	0	0	0	0	0	0	0	0
K73-2	2012-10-10	KU1	13	3	Green	Apterous	0	0	0	0	0	0	1		0	0	0	0	0	0	0	0	0	0	0	0	0	0	0	0	0	0	0	0	0	1	0	0	0	0	0	0	0	1
K73-20	2012-10-10	KU1	13	5	Red	Alate	1	0	0	0	0	0	0		0	0	0	0	0	0	0	0	0	0	0	0	0	0	0	0	0	0	0	0	0	1	0	1	0	0	0	0	0	0
K73-22	2012-10-10	KU1	13	4	Red	Apterous	1	1	0	0	0	0	0		1	0	0	0	0	0	0	0	0	0	0	0	0	0	0	0	0	0	0	0	0	2	0	0	0	0	0	0	0	0
K73-23	2012-10-10	KU1	13	3	Red	Apterous	1	0	0	0	0	0	0		0	0	0	0	0	0	0	0	0	0	0	0	0	0	0	0	0	0	0	0	0	1	0	1	0	0	0	0	0	0
K73-5	2012-10-10	KU1	13	5	Green	Apterous	0	1	1	0	0	0	0		0	0	0	0	0	0	1	0	0	0	0	0	0	0	0	0	0	0	0	0	0	2	0	0	0	0	0	0	0	0
K73-9	2012-10-10	KU1	13	5	Green	Apterous	1	0	0	1	0	0	0		0	0	1	0	0	0	0	0	0	0	0	0	0	0	0	0	0	0	0	0	0	2	0	0	0	0	0	0	0	0
K74-1	2012-10-10	KU2	13	5	Green	Apterous	0	1	1	0	0	0	0		0	0	0	0	0	0	1	0	0	0	0	0	0	0	0	0	0	0	0	0	0	2	0	0	0	0	0	0	0	0
K74-11	2012-10-10	KU2	13	4	Green	Apterous	1	0	0	0	0	0	0		0	0	0	0	0	0	0	0	0	0	0	0	0	0	0	0	0	0	0	0	0	1	0	1	0	0	0	0	0	0
K74-13	2012-10-10	KU2	13	4	Red	Apterous	1	1	0	0	0	0	0		1	0	0	0	0	0	0	0	0	0	0	0	0	0	0	0	0	0	0	0	0	2	0	0	0	0	0	0	0	0
K74-15	2012-10-10	KU2	13	5	Red	Alate	0	1	0	0	0	0	0		0	0	0	0	0	0	0	0	0	0	0	0	0	0	0	0	0	0	0	0	0	1	0	0	1	0	0	0	0	0
K74-16	2012-10-10	KU2	13	4	Red	Apterous	1	0	0	1	0	0	0		0	0	1	0	0	0	0	0	0	0	0	0	0	0	0	0	0	0	0	0	0	2	0	0	0	0	0	0	0	0
K74-18	2012-10-10	KU2	13	5	Red	Apterous	1	0	1	0	0	0	0		0	1	0	0	0	0	0	0	0	0	0	0	0	0	0	0	0	0	0	0	0	2	0	0	0	0	0	0	0	0
K74-19	2012-10-10	KU2	13	5	Red	Apterous	0	0	0	0	0	1	0		0	0	0	0	0	0	0	0	0	0	0	0	0	0	0	0	0	0	0	0	0	1	0	0	0	0	0	0	1	0
K74-2	2012-10-10	KU2	13	4	Green	Apterous	0	0	1	0	0	1	0		0	0	0	0	0	0	0	0	0	0	0	0	0	1	0	0	0	0	0	0	0	2	0	0	0	0	0	0	0	0
K74-21	2012-10-10	KU2	13	4	Red	Apterous	0	0	0	0	0	0	0		0	0	0	0	0	0	0	0	0	0	0	0	0	0	0	0	0	0	0	0	0	0	1	0	0	0	0	0	0	0
K74-23	2012-10-10	KU2	13	3	Red	Apterous	1	1	0	1	0	0	0		1	0	1	0	0	0	0	1	0	0	0	0	0	0	0	0	0	0	0	0	0	3	0	0	0	0	0	0	0	0
K74-3	2012-10-10	KU2	13	5	Green	Apterous	1	0	0	0	0	0	0		0	0	0	0	0	0	0	0	0	0	0	0	0	0	0	0	0	0	0	0	0	1	0	1	0	0	0	0	0	0
K74-5	2012-10-10	KU2	13	5	Green	Apterous	0	0	0	0	0	0	1		0	0	0	0	0	0	0	0	0	0	0	0	0	0	0	0	0	0	0	0	0	1	0	0	0	0	0	0	0	1
K74-7	2012-10-10	KU2	13	3	Green	Apterous	1	0	0	0	0	0	0		0	0	0	0	0	0	0	0	0	0	0	0	0	0	0	0	0	0	0	0	0	1	0	1	0	0	0	0	0	0
K74-8	2012-10-10	KU2	13	4	Green	Apterous	1	1	0	0	0	0	0		1	0	0	0	0	0	0	0	0	0	0	0	0	0	0	0	0	0	0	0	0	2	0	0	0	0	0	0	0	0
K74-9	2012-10-10	KU2	13	4	Green	Apterous	1	1	0	1	0	0	0		1	0	1	0	0	0	0	1	0	0	0	0	0	0	0	0	0	0	0	0	0	3	0	0	0	0	0	0	0	0
K74-10	2012-10-10	KU2	13	3	Green	Apterous	0	1	0	0	0	0	0		0	0	0	0	0	0	0	0	0	0	0	0	0	0	0	0	0	0	0	0	0	1	0	0	1	0	0	0	0	0
K74-12	2012-10-10	KU2	13	3	Green	Apterous	0	1	0	0	0	0	1		0	0	0	0	0	0	0	0	0	0	1	0	0	0	0	0	0	0	0	0	0	2	0	0	0	0	0	0	0	0
K74-14	2012-10-10	KU2	13	5	Red	Alate	1	0	0	0	0	0	0		0	0	0	0	0	0	0	0	0	0	0	0	0	0	0	0	0	0	0	0	0	1	0	1	0	0	0	0	0	0
K74-17	2012-10-10	KU2	13	5	Red	Alate	1	1	0	1	0	0	0		1	0	1	0	0	0	0	1	0	0	0	0	0	0	0	0	0	0	0	0	0	3	0	0	0	0	0	0	0	0
K74-20	2012-10-10	KU2	13	4	Red	Apterous	1	1	0	1	1	0	0		1	0	1	1	0	0	0	1	1	0	0	0	0	0	0	1	0	0	0	0	0	4	0	0	0	0	0	0	0	0
K74-22	2012-10-10	KU2	13	4	Red	Apterous	1	0	0	1	1	0	0		0	0	1	1	0	0	0	0	0	0	0	0	0	0	0	1	0	0	0	0	0	3	0	0	0	0	0	0	0	0
K74-24	2012-10-10	KU2	13	4	Red	Apterous	1	1	0	0	0	0	0		1	0	0	0	0	0	0	0	0	0	0	0	0	0	0	0	0	0	0	0	0	2	0	0	0	0	0	0	0	0
K74-4	2012-10-10	KU2	13	5	Green	Apterous	1	1	0	0	0	0	1		1	0	0	0	0	1	0	0	0	0	1	0	0	0	0	0	0	0	0	0	0	3	0	0	0	0	0	0	0	0
K74-6	2012-10-10	KU2	13	4	Green	Apterous	0	0	0	0	0	0	0		0	0	0	0	0	0	0	0	0	0	0	0	0	0	0	0	0	0	0	0	0	0	1	0	0	0	0	0	0	0
K75-1	2012-10-10	KU3	13	4	Green	Apterous	0	1	0	0	0	0	0		0	0	0	0	0	0	0	0	0	0	0	0	0	0	0	0	0	0	0	0	0	1	0	0	1	0	0	0	0	0
K75-10	2012-10-10	KU3	13	5	Green	Apterous	0	1	0	0	0	0	0		0	0	0	0	0	0	0	0	0	0	0	0	0	0	0	0	0	0	0	0	0	1	0	0	1	0	0	0	0	0
K75-14	2012-10-10	KU3	13	5	Red	Apterous	0	0	0	0	0	0	1		0	0	0	0	0	0	0	0	0	0	0	0	0	0	0	0	0	0	0	0	0	1	0	0	0	0	0	0	0	1
K75-17	2012-10-10	KU3	13	5	Red	Alate	1	0	0	0	0	0	0		0	0	0	0	0	0	0	0	0	0	0	0	0	0	0	0	0	0	0	0	0	1	0	1	0	0	0	0	0	0
K75-18	2012-10-10	KU3	13	5	Red	Apterous	0	0	0	0	0	0	0		0	0	0	0	0	0	0	0	0	0	0	0	0	0	0	0	0	0	0	0	0	0	1	0	0	0	0	0	0	0
K75-19	2012-10-10	KU3	13	4	Red	Apterous	1	0	0	1	0	0	0		0	0	1	0	0	0	0	0	0	0	0	0	0	0	0	0	0	0	0	0	0	2	0	0	0	0	0	0	0	0
K75-22	2012-10-10	KU3	13	5	Red	Apterous	1	0	0	1	0	0	0		0	0	1	0	0	0	0	0	0	0	0	0	0	0	0	0	0	0	0	0	0	2	0	0	0	0	0	0	0	0
K75-3	2012-10-10	KU3	13	3	Green	Apterous	0	0	0	0	0	0	0		0	0	0	0	0	0	0	0	0	0	0	0	0	0	0	0	0	0	0	0	0	0	1	0	0	0	0	0	0	0
K75-6	2012-10-10	KU3	13	5	Green	Apterous	1	1	0	0	0	0	0		1	0	0	0	0	0	0	0	0	0	0	0	0	0	0	0	0	0	0	0	0	2	0	0	0	0	0	0	0	0
K75-8	2012-10-10	KU3	13	4	Green	Apterous	0	0	0	0	0	0	0		0	0	0	0	0	0	0	0	0	0	0	0	0	0	0	0	0	0	0	0	0	0	1	0	0	0	0	0	0	0
K75-11	2012-10-10	KU3	13	4	Green	Apterous	1	1	0	0	0	0	0		1	0	0	0	0	0	0	0	0	0	0	0	0	0	0	0	0	0	0	0	0	2	0	0	0	0	0	0	0	0
K75-12	2012-10-10	KU3	13	4	Green	Apterous	1	1	0	0	0	0	0		1	0	0	0	0	0	0	0	0	0	0	0	0	0	0	0	0	0	0	0	0	2	0	0	0	0	0	0	0	0
K75-13	2012-10-10	KU3	13	5	Red	Apterous	1	0	0	1	0	0	0		0	0	1	0	0	0	0	0	0	0	0	0	0	0	0	0	0	0	0	0	0	2	0	0	0	0	0	0	0	0
K75-15	2012-10-10	KU3	13	5	Red	Apterous	0	0	0	0	0	0	0		0	0	0	0	0	0	0	0	0	0	0	0	0	0	0	0	0	0	0	0	0	0	1	0	0	0	0	0	0	0
K75-16	2012-10-10	KU3	13	5	Red	Apterous	1	0	0	0	0	0	0		0	0	0	0	0	0	0	0	0	0	0	0	0	0	0	0	0	0	0	0	0	1	0	1	0	0	0	0	0	0
K75-2	2012-10-10	KU3	13	4	Green	Apterous	0	1	0	0	0	0	0		0	0	0	0	0	0	0	0	0	0	0	0	0	0	0	0	0	0	0	0	0	1	0	0	1	0	0	0	0	0
K75-20	2012-10-10	KU3	13	4	Red	Apterous	0	0	0	0	0	0	0		0	0	0	0	0	0	0	0	0	0	0	0	0	0	0	0	0	0	0	0	0	0	1	0	0	0	0	0	0	0
K75-21	2012-10-10	KU3	13	5	Red	Apterous	0	0	0	1	0	0	0		0	0	0	0	0	0	0	0	0	0	0	0	0	0	0	0	0	0	0	0	0	1	0	0	0	0	1	0	0	0
K75-23	2012-10-10	KU3	13	3	Red	Apterous	1	0	0	0	0	0	0		0	0	0	0	0	0	0	0	0	0	0	0	0	0	0	0	0	0	0	0	0	1	0	1	0	0	0	0	0	0
K75-24	2012-10-10	KU3	13	3	Red	Apterous	0	0	0	0	0	0	0		0	0	0	0	0	0	0	0	0	0	0	0	0	0	0	0	0	0	0	0	0	0	1	0	0	0	0	0	0	0
K75-4	2012-10-10	KU3	13	5	Green	Apterous	0	0	0	0	0	0	0		0	0	0	0	0	0	0	0	0	0	0	0	0	0	0	0	0	0	0	0	0	0	1	0	0	0	0	0	0	0
K75-5	2012-10-10	KU3	13	5	Green	Apterous	1	1	0	0	0	0	0		1	0	0	0	0	0	0	0	0	0	0	0	0	0	0	0	0	0	0	0	0	2	0	0	0	0	0	0	0	0
K75-7	2012-10-10	KU3	13	5	Green	Apterous	0	1	0	0	0	0	0		0	0	0	0	0	0	0	0	0	0	0	0	0	0	0	0	0	0	0	0	0	1	0	0	1	0	0	0	0	0
K75-9	2012-10-10	KU3	13	5	Green	Apterous	1	0	0	1	0	0	0		0	0	1	0	0	0	0	0	0	0	0	0	0	0	0	0	0	0	0	0	0	2	0	0	0	0	0	0	0	0
K76-1	2012-10-10	KU4	13	5	Green	Apterous	1	0	0	0	0	0	1		0	0	0	0	0	1	0	0	0	0	0	0	0	0	0	0	0	0	0	0	0	2	0	0	0	0	0	0	0	0
K76-10	2012-10-10	KU4	13	3	Green	Apterous	1	0	0	0	0	0	0		0	0	0	0	0	0	0	0	0	0	0	0	0	0	0	0	0	0	0	0	0	1	0	1	0	0	0	0	0	0
K76-12	2012-10-10	KU4	13	5	Green	Apterous	0	0	1	0	0	1	0		0	0	0	0	0	0	0	0	0	0	0	0	0	1	0	0	0	0	0	0	0	2	0	0	0	0	0	0	0	0
K76-13	2012-10-10	KU4	13	5	Red	Apterous	0	0	1	0	0	0	0		0	0	0	0	0	0	0	0	0	0	0	0	0	0	0	0	0	0	0	0	0	1	0	0	0	1	0	0	0	0
K76-15	2012-10-10	KU4	13	5	Red	Alate	0	0	1	0	0	1	0		0	0	0	0	0	0	0	0	0	0	0	0	0	1	0	0	0	0	0	0	0	2	0	0	0	0	0	0	0	0
K76-16	2012-10-10	KU4	13	5	Red	Apterous	1	1	0	0	0	0	0		1	0	0	0	0	0	0	0	0	0	0	0	0	0	0	0	0	0	0	0	0	2	0	0	0	0	0	0	0	0
K76-18	2012-10-10	KU4	13	4	Red	Apterous	0	0	1	1	0	0	0		0	0	0	0	0	0	0	0	0	0	0	1	0	0	0	0	0	0	0	0	0	2	0	0	0	0	0	0	0	0
K76-19	2012-10-10	KU4	13	4	Red	Apterous	0	0	0	0	0	0	0		0	0	0	0	0	0	0	0	0	0	0	0	0	0	0	0	0	0	0	0	0	0	1	0	0	0	0	0	0	0
K76-20	2012-10-10	KU4	13	4	Red	Apterous	1	0	0	0	0	0	0		0	0	0	0	0	0	0	0	0	0	0	0	0	0	0	0	0	0	0	0	0	1	0	1	0	0	0	0	0	0
K76-21	2012-10-10	KU4	13	4	Red	Apterous	1	1	1	1	0	1	1		1	1	1	0	1	1	1	1	0	1	1	1	0	1	1	0	1	1	0	0	1	6	0	0	0	0	0	0	0	0
K76-22	2012-10-10	KU4	13	5	Red	Apterous	1	0	0	1	0	0	1		0	0	1	0	0	1	0	0	0	0	0	0	0	0	0	0	0	1	0	0	0	3	0	0	0	0	0	0	0	0
K76-23	2012-10-10	KU4	13	4	Red	Apterous	1	0	0	1	0	0	0		0	0	1	0	0	0	0	0	0	0	0	0	0	0	0	0	0	0	0	0	0	2	0	0	0	0	0	0	0	0
K76-24	2012-10-10	KU4	13	4	Red	Apterous	1	0	0	0	0	0	0		0	0	0	0	0	0	0	0	0	0	0	0	0	0	0	0	0	0	0	0	0	1	0	1	0	0	0	0	0	0
K76-3	2012-10-10	KU4	13	5	Green	Apterous	1	0	0	0	0	0	0		0	0	0	0	0	0	0	0	0	0	0	0	0	0	0	0	0	0	0	0	0	1	0	1	0	0	0	0	0	0
K76-4	2012-10-10	KU4	13	5	Green	Apterous	1	0	0	0	0	0	0		0	0	0	0	0	0	0	0	0	0	0	0	0	0	0	0	0	0	0	0	0	1	0	1	0	0	0	0	0	0
K76-5	2012-10-10	KU4	13	5	Green	Apterous	1	0	1	1	0	0	0		0	1	1	0	0	0	0	0	0	0	0	1	0	0	0	0	0	0	0	0	0	3	0	0	0	0	0	0	0	0
K76-6	2012-10-10	KU4	13	5	Green	Apterous	0	0	0	0	0	1	0		0	0	0	0	0	0	0	0	0	0	0	0	0	0	0	0	0	0	0	0	0	1	0	0	0	0	0	0	1	0
K76-7	2012-10-10	KU4	13	3	Green	Apterous	1	1	0	0	0	0	0		1	0	0	0	0	0	0	0	0	0	0	0	0	0	0	0	0	0	0	0	0	2	0	0	0	0	0	0	0	0
K76-9	2012-10-10	KU4	13	5	Green	Apterous	0	0	0	0	0	0	0		0	0	0	0	0	0	0	0	0	0	0	0	0	0	0	0	0	0	0	0	0	0	1	0	0	0	0	0	0	0
K76-11	2012-10-10	KU4	13	3	Green	Apterous	0	0	0	1	0	0	0		0	0	0	0	0	0	0	0	0	0	0	0	0	0	0	0	0	0	0	0	0	1	0	0	0	0	1	0	0	0
K76-14	2012-10-10	KU4	13	3	Red	Apterous	0	0	0	0	0	0	0		0	0	0	0	0	0	0	0	0	0	0	0	0	0	0	0	0	0	0	0	0	0	1	0	0	0	0	0	0	0
K76-17	2012-10-10	KU4	13	5	Red	Apterous	0	0	0	0	0	0	0		0	0	0	0	0	0	0	0	0	0	0	0	0	0	0	0	0	0	0	0	0	0	1	0	0	0	0	0	0	0
K76-2	2012-10-10	KU4	13	4	Green	Apterous	0	0	1	0	0	0	0		0	0	0	0	0	0	0	0	0	0	0	0	0	0	0	0	0	0	0	0	0	1	0	0	0	1	0	0	0	0
K76-8	2012-10-10	KU4	13	3	Green	Apterous	1	0	0	0	0	0	0		0	0	0	0	0	0	0	0	0	0	0	0	0	0	0	0	0	0	0	0	0	1	0	1	0	0	0	0	0	0
K77-1	2012-10-10	KU5	13	5	Green	Apterous	0	0	0	0	1	0	0		0	0	0	0	0	0	0	0	0	0	0	0	0	0	0	0	0	0	0	0	0	1	0	0	0	0	0	1	0	0
K77-10	2012-10-10	KU5	13	3	Green	Apterous	1	0	1	0	0	0	0		0	1	0	0	0	0	0	0	0	0	0	0	0	0	0	0	0	0	0	0	0	2	0	0	0	0	0	0	0	0
K77-11	2012-10-10	KU5	13	3	Green	Apterous	0	1	0	0	0	0	0		0	0	0	0	0	0	0	0	0	0	0	0	0	0	0	0	0	0	0	0	0	1	0	0	1	0	0	0	0	0
K77-12	2012-10-10	KU5	13	3	Green	Apterous	1	0	0	1	0	0	0		0	0	1	0	0	0	0	0	0	0	0	0	0	0	0	0	0	0	0	0	0	2	0	0	0	0	0	0	0	0
K77-13	2012-10-10	KU5	13	5	Red	Alate	1	0	0	1	1	0	0		0	0	1	1	0	0	0	0	0	0	0	0	0	0	0	1	0	0	0	0	0	3	0	0	0	0	0	0	0	0
K77-14	2012-10-10	KU5	13	5	Red	Alate	1	1	0	0	0	0	0		1	0	0	0	0	0	0	0	0	0	0	0	0	0	0	0	0	0	0	0	0	2	0	0	0	0	0	0	0	0
K77-15	2012-10-10	KU5	13	3	Red	Apterous	0	0	0	0	0	0	0		0	0	0	0	0	0	0	0	0	0	0	0	0	0	0	0	0	0	0	0	0	0	1	0	0	0	0	0	0	0
K77-16	2012-10-10	KU5	13	4	Red	Apterous	0	0	1	0	0	0	0		0	0	0	0	0	0	0	0	0	0	0	0	0	0	0	0	0	0	0	0	0	1	0	0	0	1	0	0	0	0
K77-17	2012-10-10	KU5	13	5	Red	Alate	0	0	0	0	0	0	0		0	0	0	0	0	0	0	0	0	0	0	0	0	0	0	0	0	0	0	0	0	0	1	0	0	0	0	0	0	0
K77-18	2012-10-10	KU5	13	4	Red	Apterous	1	0	0	0	1	0	0		0	0	0	1	0	0	0	0	0	0	0	0	0	0	0	0	0	0	0	0	0	2	0	0	0	0	0	0	0	0
K77-19	2012-10-10	KU5	13	5	Red	Alate	1	0	0	1	0	0	0		0	0	1	0	0	0	0	0	0	0	0	0	0	0	0	0	0	0	0	0	0	2	0	0	0	0	0	0	0	0
K77-2	2012-10-10	KU5	13	5	Green	Apterous	1	0	0	1	0	0	0		0	0	1	0	0	0	0	0	0	0	0	0	0	0	0	0	0	0	0	0	0	2	0	0	0	0	0	0	0	0
K77-20	2012-10-10	KU5	13	4	Red	Apterous	1	0	0	0	0	0	0		0	0	0	0	0	0	0	0	0	0	0	0	0	0	0	0	0	0	0	0	0	1	0	1	0	0	0	0	0	0
K77-21	2012-10-10	KU5	13	4	Red	Apterous	1	0	0	0	0	0	0		0	0	0	0	0	0	0	0	0	0	0	0	0	0	0	0	0	0	0	0	0	1	0	1	0	0	0	0	0	0
K77-22	2012-10-10	KU5	13	3	Red	Apterous	1	0	0	0	1	0	0		0	0	0	1	0	0	0	0	0	0	0	0	0	0	0	0	0	0	0	0	0	2	0	0	0	0	0	0	0	0
K77-23	2012-10-10	KU5	13	4	Red	Apterous	1	1	0	0	0	0	0		1	0	0	0	0	0	0	0	0	0	0	0	0	0	0	0	0	0	0	0	0	2	0	0	0	0	0	0	0	0
K77-24	2012-10-10	KU5	13	3	Red	Apterous	1	0	0	0	0	0	0		0	0	0	0	0	0	0	0	0	0	0	0	0	0	0	0	0	0	0	0	0	1	0	1	0	0	0	0	0	0
K77-3	2012-10-10	KU5	13	4	Green	Apterous	1	0	0	1	0	0	1		0	0	1	0	0	1	0	0	0	0	0	0	0	0	0	0	0	1	0	0	0	3	0	0	0	0	0	0	0	0
K77-4	2012-10-10	KU5	13	3	Green	Apterous	0	1	0	0	0	0	0		0	0	0	0	0	0	0	0	0	0	0	0	0	0	0	0	0	0	0	0	0	1	0	0	1	0	0	0	0	0
K77-5	2012-10-10	KU5	13	5	Green	Apterous	0	0	0	0	0	0	1		0	0	0	0	0	0	0	0	0	0	0	0	0	0	0	0	0	0	0	0	0	1	0	0	0	0	0	0	0	1
K77-6	2012-10-10	KU5	13	4	Green	Apterous	0	0	0	1	0	0	0		0	0	0	0	0	0	0	0	0	0	0	0	0	0	0	0	0	0	0	0	0	1	0	0	0	0	1	0	0	0
K77-7	2012-10-10	KU5	13	4	Green	Apterous	1	0	0	0	0	0	0		0	0	0	0	0	0	0	0	0	0	0	0	0	0	0	0	0	0	0	0	0	1	0	1	0	0	0	0	0	0
K77-8	2012-10-10	KU5	13	4	Green	Apterous	1	1	0	0	0	0	0		1	0	0	0	0	0	0	0	0	0	0	0	0	0	0	0	0	0	0	0	0	2	0	0	0	0	0	0	0	0
K77-9	2012-10-10	KU5	13	3	Green	Apterous	0	0	0	1	0	0	0		0	0	0	0	0	0	0	0	0	0	0	0	0	0	0	0	0	0	0	0	0	1	0	0	0	0	1	0	0	0
K78-1	2012-10-10	KU6	13	5	Green	Apterous	0	0	0	0	0	0	0		0	0	0	0	0	0	0	0	0	0	0	0	0	0	0	0	0	0	0	0	0	0	1	0	0	0	0	0	0	0
K78-10	2012-10-10	KU6	13	5	Green	Alate	0	0	0	0	0	0	0		0	0	0	0	0	0	0	0	0	0	0	0	0	0	0	0	0	0	0	0	0	0	1	0	0	0	0	0	0	0
K78-11	2012-10-10	KU6	13	4	Green	Apterous	0	1	0	0	0	0	0		0	0	0	0	0	0	0	0	0	0	0	0	0	0	0	0	0	0	0	0	0	1	0	0	1	0	0	0	0	0
K78-12	2012-10-10	KU6	13	4	Green	Apterous	1	1	0	0	0	0	0		1	0	0	0	0	0	0	0	0	0	0	0	0	0	0	0	0	0	0	0	0	2	0	0	0	0	0	0	0	0
K78-13	2012-10-10	KU6	13	5	Red	Apterous	0	0	0	1	0	0	0		0	0	0	0	0	0	0	0	0	0	0	0	0	0	0	0	0	0	0	0	0	1	0	0	0	0	1	0	0	0
K78-14	2012-10-10	KU6	13	5	Red	Alate	0	0	0	0	0	0	0		0	0	0	0	0	0	0	0	0	0	0	0	0	0	0	0	0	0	0	0	0	0	1	0	0	0	0	0	0	0
K78-15	2012-10-10	KU6	13	5	Red	Apterous	1	0	0	0	0	0	0		0	0	0	0	0	0	0	0	0	0	0	0	0	0	0	0	0	0	0	0	0	1	0	1	0	0	0	0	0	0
K78-16	2012-10-10	KU6	13	5	Red	Alate	1	0	0	1	0	0	0		0	0	1	0	0	0	0	0	0	0	0	0	0	0	0	0	0	0	0	0	0	2	0	0	0	0	0	0	0	0
K78-17	2012-10-10	KU6	13	4	Red	Apterous	0	0	0	0	0	0	0		0	0	0	0	0	0	0	0	0	0	0	0	0	0	0	0	0	0	0	0	0	0	1	0	0	0	0	0	0	0
K78-18	2012-10-10	KU6	13	5	Red	Apterous	0	1	0	0	0	0	0		0	0	0	0	0	0	0	0	0	0	0	0	0	0	0	0	0	0	0	0	0	1	0	0	1	0	0	0	0	0
K78-19	2012-10-10	KU6	13	4	Red	Apterous	1	0	0	1	0	0	0		0	0	1	0	0	0	0	0	0	0	0	0	0	0	0	0	0	0	0	0	0	2	0	0	0	0	0	0	0	0
K78-2	2012-10-10	KU6	13	4	Green	Apterous	1	0	0	0	0	0	0		0	0	0	0	0	0	0	0	0	0	0	0	0	0	0	0	0	0	0	0	0	1	0	1	0	0	0	0	0	0
K78-20	2012-10-10	KU6	13	4	Red	Apterous	1	0	0	0	0	0	0		0	0	0	0	0	0	0	0	0	0	0	0	0	0	0	0	0	0	0	0	0	1	0	1	0	0	0	0	0	0
K78-21	2012-10-10	KU6	13	4	Red	Apterous	1	0	0	0	0	0	0		0	0	0	0	0	0	0	0	0	0	0	0	0	0	0	0	0	0	0	0	0	1	0	1	0	0	0	0	0	0
K78-22	2012-10-10	KU6	13	3	Red	Apterous	0	0	0	0	0	0	0		0	0	0	0	0	0	0	0	0	0	0	0	0	0	0	0	0	0	0	0	0	0	1	0	0	0	0	0	0	0
K78-23	2012-10-10	KU6	13	2	Red	Apterous	1	0	0	0	0	0	0		0	0	0	0	0	0	0	0	0	0	0	0	0	0	0	0	0	0	0	0	0	1	0	1	0	0	0	0	0	0
K78-24	2012-10-10	KU6	13	2	Red	Apterous	0	0	0	0	0	0	0		0	0	0	0	0	0	0	0	0	0	0	0	0	0	0	0	0	0	0	0	0	0	1	0	0	0	0	0	0	0
K78-3	2012-10-10	KU6	13	5	Green	Apterous	1	0	1	1	0	1	0		0	1	1	0	1	0	0	0	0	0	0	1	0	1	0	0	1	0	0	0	0	4	0	0	0	0	0	0	0	0
K78-4	2012-10-10	KU6	13	5	Green	Apterous	1	0	1	0	0	0	0		0	1	0	0	0	0	0	0	0	0	0	0	0	0	0	0	0	0	0	0	0	2	0	0	0	0	0	0	0	0
K78-5	2012-10-10	KU6	13	5	Green	Apterous	0	1	0	0	0	0	0		0	0	0	0	0	0	0	0	0	0	0	0	0	0	0	0	0	0	0	0	0	1	0	0	1	0	0	0	0	0
K78-6	2012-10-10	KU6	13	5	Green	Apterous	1	1	0	0	0	0	0		1	0	0	0	0	0	0	0	0	0	0	0	0	0	0	0	0	0	0	0	0	2	0	0	0	0	0	0	0	0
K78-7	2012-10-10	KU6	13	3	Green	Apterous	0	1	0	0	0	0	0		0	0	0	0	0	0	0	0	0	0	0	0	0	0	0	0	0	0	0	0	0	1	0	0	1	0	0	0	0	0
K78-8	2012-10-10	KU6	13	5	Green	Alate	0	1	0	0	0	0	0		0	0	0	0	0	0	0	0	0	0	0	0	0	0	0	0	0	0	0	0	0	1	0	0	1	0	0	0	0	0
K78-9	2012-10-10	KU6	13	4	Green	Apterous	0	1	0	0	0	0	0		0	0	0	0	0	0	0	0	0	0	0	0	0	0	0	0	0	0	0	0	0	1	0	0	1	0	0	0	0	0
K79-2	2012-10-25	KU1	14	5	Green	Alate	0	0	1	0	0	1	0		0	0	0	0	0	0	0	0	0	0	0	0	0	1	0	0	0	0	0	0	0	2	0	0	0	0	0	0	0	0
K79-1	2012-10-25	KU1	14	5	Green	Apterous	0	1	0	0	0	0	0		0	0	0	0	0	0	0	0	0	0	0	0	0	0	0	0	0	0	0	0	0	1	0	0	1	0	0	0	0	0
K79-10	2012-10-25	KU1	14	4	Green	Apterous	1	1	0	0	1	0	0		1	0	0	1	0	0	0	0	1	0	0	0	0	0	0	0	0	0	0	0	0	3	0	0	0	0	0	0	0	0
K79-11	2012-10-25	KU1	14	4	Green	Apterous	1	1	1	0	0	0	0		1	1	0	0	0	0	1	0	0	0	0	0	0	0	0	0	0	0	0	0	0	3	0	0	0	0	0	0	0	0
K79-16	2012-10-25	KU1	14	3	Red	Apterous	1	1	0	0	0	0	0		1	0	0	0	0	0	0	0	0	0	0	0	0	0	0	0	0	0	0	0	0	2	0	0	0	0	0	0	0	0
K79-17	2012-10-25	KU1	14	4	Red	Apterous	0	0	0	0	0	0	1		0	0	0	0	0	0	0	0	0	0	0	0	0	0	0	0	0	0	0	0	0	1	0	0	0	0	0	0	0	1
K79-18	2012-10-25	KU1	14	3	Red	Apterous	1	0	0	0	0	0	0		0	0	0	0	0	0	0	0	0	0	0	0	0	0	0	0	0	0	0	0	0	1	0	1	0	0	0	0	0	0
K79-19	2012-10-25	KU1	14	3	Red	Apterous	0	1	0	0	0	0	0		0	0	0	0	0	0	0	0	0	0	0	0	0	0	0	0	0	0	0	0	0	1	0	0	1	0	0	0	0	0
K79-24	2012-10-25	KU1	14	2	Red	Apterous	1	0	0	0	0	0	0		0	0	0	0	0	0	0	0	0	0	0	0	0	0	0	0	0	0	0	0	0	1	0	1	0	0	0	0	0	0
K79-3	2012-10-25	KU1	14	4	Green	Apterous	1	0	0	0	0	0	0		0	0	0	0	0	0	0	0	0	0	0	0	0	0	0	0	0	0	0	0	0	1	0	1	0	0	0	0	0	0
K79-4	2012-10-25	KU1	14	4	Green	Apterous	0	1	1	0	1	0	0		0	0	0	0	0	0	1	0	1	0	0	0	1	0	0	0	0	0	0	0	0	3	0	0	0	0	0	0	0	0
K79-5	2012-10-25	KU1	14	5	Green	Apterous	0	1	0	0	0	0	1		0	0	0	0	0	0	0	0	0	0	1	0	0	0	0	0	0	0	0	0	0	2	0	0	0	0	0	0	0	0
K79-6	2012-10-25	KU1	14	5	Green	Alate	0	0	0	0	0	0	0		0	0	0	0	0	0	0	0	0	0	0	0	0	0	0	0	0	0	0	0	0	0	1	0	0	0	0	0	0	0
K79-7	2012-10-25	KU1	14	4	Green	Apterous	1	0	0	0	0	0	0		0	0	0	0	0	0	0	0	0	0	0	0	0	0	0	0	0	0	0	0	0	1	0	1	0	0	0	0	0	0
K79-8	2012-10-25	KU1	14	4	Green	Apterous	0	1	0	0	0	0	0		0	0	0	0	0	0	0	0	0	0	0	0	0	0	0	0	0	0	0	0	0	1	0	0	1	0	0	0	0	0
K79-9	2012-10-25	KU1	14	4	Green	Apterous	0	1	0	0	0	0	0		0	0	0	0	0	0	0	0	0	0	0	0	0	0	0	0	0	0	0	0	0	1	0	0	1	0	0	0	0	0
K79-12	2012-10-25	KU1	14	4	Green	Apterous	1	0	0	1	0	0	0		0	0	1	0	0	0	0	0	0	0	0	0	0	0	0	0	0	0	0	0	0	2	0	0	0	0	0	0	0	0
K79-13	2012-10-25	KU1	14	5	Red	Apterous	0	0	0	1	0	0	0		0	0	0	0	0	0	0	0	0	0	0	0	0	0	0	0	0	0	0	0	0	1	0	0	0	0	1	0	0	0
K79-14	2012-10-25	KU1	14	3	Red	Apterous	0	0	1	0	0	0	0		0	0	0	0	0	0	0	0	0	0	0	0	0	0	0	0	0	0	0	0	0	1	0	0	0	1	0	0	0	0
K79-15	2012-10-25	KU1	14	3	Red	Apterous	0	0	0	0	0	0	1		0	0	0	0	0	0	0	0	0	0	0	0	0	0	0	0	0	0	0	0	0	1	0	0	0	0	0	0	0	1
K79-20	2012-10-25	KU1	14	3	Red	Apterous	0	0	0	1	0	0	0		0	0	0	0	0	0	0	0	0	0	0	0	0	0	0	0	0	0	0	0	0	1	0	0	0	0	1	0	0	0
K79-21	2012-10-25	KU1	14	3	Red	Apterous	1	1	0	0	0	0	0		1	0	0	0	0	0	0	0	0	0	0	0	0	0	0	0	0	0	0	0	0	2	0	0	0	0	0	0	0	0
K79-22	2012-10-25	KU1	14	3	Red	Apterous	1	0	0	0	0	0	1		0	0	0	0	0	1	0	0	0	0	0	0	0	0	0	0	0	0	0	0	0	2	0	0	0	0	0	0	0	0
K79-23	2012-10-25	KU1	14	3	Red	Apterous	1	0	0	1	0	0	0		0	0	1	0	0	0	0	0	0	0	0	0	0	0	0	0	0	0	0	0	0	2	0	0	0	0	0	0	0	0
K80-1	2012-10-25	KU2	14	5	Green	Apterous	0	1	1	0	0	0	0		0	0	0	0	0	0	1	0	0	0	0	0	0	0	0	0	0	0	0	0	0	2	0	0	0	0	0	0	0	0
K80-10	2012-10-25	KU2	14	3	Green	Apterous	1	0	1	0	0	1	0		0	1	0	0	1	0	0	0	0	0	0	0	0	1	0	0	0	0	0	0	0	3	0	0	0	0	0	0	0	0
K80-12	2012-10-25	KU2	14	4	Green	Apterous	1	0	0	1	0	0	0		0	0	1	0	0	0	0	0	0	0	0	0	0	0	0	0	0	0	0	0	0	2	0	0	0	0	0	0	0	0
K80-16	2012-10-25	KU2	14	4	Red	Apterous	0	0	0	1	0	0	0		0	0	0	0	0	0	0	0	0	0	0	0	0	0	0	0	0	0	0	0	0	1	0	0	0	0	1	0	0	0
K80-17	2012-10-25	KU2	14	5	Red	Alate	0	0	0	1	0	0	0		0	0	0	0	0	0	0	0	0	0	0	0	0	0	0	0	0	0	0	0	0	1	0	0	0	0	1	0	0	0
K80-19	2012-10-25	KU2	14	5	Red	Alate	1	1	1	0	1	0	0		1	1	0	1	0	0	1	0	1	0	0	0	1	0	0	0	0	0	0	0	0	4	0	0	0	0	0	0	0	0
K80-22	2012-10-25	KU2	14	2	Red	Apterous	1	0	0	1	0	0	0		0	0	1	0	0	0	0	0	0	0	0	0	0	0	0	0	0	0	0	0	0	2	0	0	0	0	0	0	0	0
K80-3	2012-10-25	KU2	14	4	Green	Apterous	0	0	1	0	0	1	0		0	0	0	0	0	0	0	0	0	0	0	0	0	1	0	0	0	0	0	0	0	2	0	0	0	0	0	0	0	0
K80-5	2012-10-25	KU2	14	4	Green	Apterous	0	0	1	0	0	1	0		0	0	0	0	0	0	0	0	0	0	0	0	0	1	0	0	0	0	0	0	0	2	0	0	0	0	0	0	0	0
K80-9	2012-10-25	KU2	14	5	Green	Apterous	1	0	1	1	0	1	0		0	1	1	0	1	0	0	0	0	0	0	1	0	1	0	0	1	0	0	0	0	4	0	0	0	0	0	0	0	0
K80-13	2012-10-25	KU2	14	5	Red	Apterous	1	0	0	1	0	0	0		0	0	1	0	0	0	0	0	0	0	0	0	0	0	0	0	0	0	0	0	0	2	0	0	0	0	0	0	0	0
K80-14	2012-10-25	KU2	14	4	Red	Apterous	1	0	0	1	0	0	0		0	0	1	0	0	0	0	0	0	0	0	0	0	0	0	0	0	0	0	0	0	2	0	0	0	0	0	0	0	0
K80-15	2012-10-25	KU2	14	4	Red	Apterous	0	0	0	1	1	0	0		0	0	0	0	0	0	0	0	0	0	0	0	0	0	0	1	0	0	0	0	0	2	0	0	0	0	0	0	0	0
K80-2	2012-10-25	KU2	14	5	Green	Alate	1	0	0	0	0	0	0		0	0	0	0	0	0	0	0	0	0	0	0	0	0	0	0	0	0	0	0	0	1	0	1	0	0	0	0	0	0
K80-21	2012-10-25	KU2	14	3	Red	Apterous	1	0	0	1	0	0	0		0	0	1	0	0	0	0	0	0	0	0	0	0	0	0	0	0	0	0	0	0	2	0	0	0	0	0	0	0	0
K80-23	2012-10-25	KU2	14	2	Red	Apterous	1	0	0	1	0	0	0		0	0	1	0	0	0	0	0	0	0	0	0	0	0	0	0	0	0	0	0	0	2	0	0	0	0	0	0	0	0
K80-24	2012-10-25	KU2	14	2	Red	Apterous	1	0	0	0	1	0	0		0	0	0	1	0	0	0	0	0	0	0	0	0	0	0	0	0	0	0	0	0	2	0	0	0	0	0	0	0	0
K80-4	2012-10-25	KU2	14	5	Green	Apterous	0	1	0	0	0	0	0		0	0	0	0	0	0	0	0	0	0	0	0	0	0	0	0	0	0	0	0	0	1	0	0	1	0	0	0	0	0
K80-6	2012-10-25	KU2	14	4	Green	Apterous	0	1	0	0	0	0	0		0	0	0	0	0	0	0	0	0	0	0	0	0	0	0	0	0	0	0	0	0	1	0	0	1	0	0	0	0	0
K80-7	2012-10-25	KU2	14	5	Green	Alate	1	0	0	0	0	0	0		0	0	0	0	0	0	0	0	0	0	0	0	0	0	0	0	0	0	0	0	0	1	0	1	0	0	0	0	0	0
K80-20	2012-10-25	KU2	14	3	Red	Apterous	1	0	0	1	0	1	0		0	0	1	0	1	0	0	0	0	0	0	0	0	0	0	0	1	0	0	0	0	3	0	0	0	0	0	0	0	0
K80-8	2012-10-25	KU2	14	4	Green	Apterous	1	0	1	0	0	1	1		0	1	0	0	1	1	0	0	0	0	0	0	0	1	1	0	0	0	0	0	1	4	0	0	0	0	0	0	0	0
K80-11	2012-10-25	KU2	14	4	Green	Apterous	0	1	0	0	0	0	0		0	0	0	0	0	0	0	0	0	0	0	0	0	0	0	0	0	0	0	0	0	1	0	0	1	0	0	0	0	0
K80-18	2012-10-25	KU2	14	5	Red	Alate	0	0	0	0	0	0	0		0	0	0	0	0	0	0	0	0	0	0	0	0	0	0	0	0	0	0	0	0	0	1	0	0	0	0	0	0	0
K81-1	2012-10-25	KU3	14	5	Green	Alate	0	0	0	0	0	0	0		0	0	0	0	0	0	0	0	0	0	0	0	0	0	0	0	0	0	0	0	0	0	1	0	0	0	0	0	0	0
K81-10	2012-10-25	KU3	14	3	Green	Apterous	1	0	0	0	0	0	0		0	0	0	0	0	0	0	0	0	0	0	0	0	0	0	0	0	0	0	0	0	1	0	1	0	0	0	0	0	0
K81-11	2012-10-25	KU3	14	3	Green	Apterous	1	0	1	1	0	1	0		0	1	1	0	1	0	0	0	0	0	0	1	0	1	0	0	1	0	0	0	0	4	0	0	0	0	0	0	0	0
K81-14	2012-10-25	KU3	14	5	Red	Apterous	0	0	0	1	0	0	0		0	0	0	0	0	0	0	0	0	0	0	0	0	0	0	0	0	0	0	0	0	1	0	0	0	0	1	0	0	0
K81-17	2012-10-25	KU3	14	5	Red	Apterous	0	0	0	0	0	0	0		0	0	0	0	0	0	0	0	0	0	0	0	0	0	0	0	0	0	0	0	0	0	1	0	0	0	0	0	0	0
K81-18	2012-10-25	KU3	14	5	Red	Apterous	1	0	0	0	0	0	0		0	0	0	0	0	0	0	0	0	0	0	0	0	0	0	0	0	0	0	0	0	1	0	1	0	0	0	0	0	0
K81-3	2012-10-25	KU3	14	4	Green	Apterous	0	0	1	0	0	1	0		0	0	0	0	0	0	0	0	0	0	0	0	0	1	0	0	0	0	0	0	0	2	0	0	0	0	0	0	0	0
K81-4	2012-10-25	KU3	14	4	Green	Apterous	0	1	0	0	0	0	0		0	0	0	0	0	0	0	0	0	0	0	0	0	0	0	0	0	0	0	0	0	1	0	0	1	0	0	0	0	0
K81-5	2012-10-25	KU3	14	5	Green	Alate	0	0	1	0	0	1	0		0	0	0	0	0	0	0	0	0	0	0	0	0	1	0	0	0	0	0	0	0	2	0	0	0	0	0	0	0	0
K81-8	2012-10-25	KU3	14	4	Green	Apterous	0	1	0	0	0	0	0		0	0	0	0	0	0	0	0	0	0	0	0	0	0	0	0	0	0	0	0	0	1	0	0	1	0	0	0	0	0
K81-9	2012-10-25	KU3	14	5	Green	Apterous	0	0	0	0	0	0	0		0	0	0	0	0	0	0	0	0	0	0	0	0	0	0	0	0	0	0	0	0	0	1	0	0	0	0	0	0	0
K81-12	2012-10-25	KU3	14	3	Green	Apterous	0	1	0	0	0	0	0		0	0	0	0	0	0	0	0	0	0	0	0	0	0	0	0	0	0	0	0	0	1	0	0	1	0	0	0	0	0
K81-13	2012-10-25	KU3	14	5	Red	Apterous	0	0	0	0	0	0	0		0	0	0	0	0	0	0	0	0	0	0	0	0	0	0	0	0	0	0	0	0	0	1	0	0	0	0	0	0	0
K81-15	2012-10-25	KU3	14	4	Red	Apterous	1	0	0	1	0	0	0		0	0	1	0	0	0	0	0	0	0	0	0	0	0	0	0	0	0	0	0	0	2	0	0	0	0	0	0	0	0
K81-16	2012-10-25	KU3	14	3	Red	Apterous	1	0	0	0	0	0	0		0	0	0	0	0	0	0	0	0	0	0	0	0	0	0	0	0	0	0	0	0	1	0	1	0	0	0	0	0	0
K81-19	2012-10-25	KU3	14	4	Red	Apterous	0	1	0	0	0	0	0		0	0	0	0	0	0	0	0	0	0	0	0	0	0	0	0	0	0	0	0	0	1	0	0	1	0	0	0	0	0
K81-2	2012-10-25	KU3	14	5	Green	Alate	0	1	0	0	0	0	0		0	0	0	0	0	0	0	0	0	0	0	0	0	0	0	0	0	0	0	0	0	1	0	0	1	0	0	0	0	0
K81-20	2012-10-25	KU3	14	3	Red	Apterous	1	0	0	0	0	0	0		0	0	0	0	0	0	0	0	0	0	0	0	0	0	0	0	0	0	0	0	0	1	0	1	0	0	0	0	0	0
K81-21	2012-10-25	KU3	14	3	Red	Apterous	1	0	0	0	0	0	0		0	0	0	0	0	0	0	0	0	0	0	0	0	0	0	0	0	0	0	0	0	1	0	1	0	0	0	0	0	0
K81-22	2012-10-25	KU3	14	4	Red	Apterous	1	0	0	0	0	0	0		0	0	0	0	0	0	0	0	0	0	0	0	0	0	0	0	0	0	0	0	0	1	0	1	0	0	0	0	0	0
K81-23	2012-10-25	KU3	14	4	Red	Apterous	1	0	0	0	0	0	0		0	0	0	0	0	0	0	0	0	0	0	0	0	0	0	0	0	0	0	0	0	1	0	1	0	0	0	0	0	0
K81-6	2012-10-25	KU3	14	5	Green	Alate	0	0	1	0	0	0	0		0	0	0	0	0	0	0	0	0	0	0	0	0	0	0	0	0	0	0	0	0	1	0	0	0	1	0	0	0	0
K81-7	2012-10-25	KU3	14	5	Green	Apterous	0	0	0	0	0	0	0		0	0	0	0	0	0	0	0	0	0	0	0	0	0	0	0	0	0	0	0	0	0	1	0	0	0	0	0	0	0
K82-9	2012-10-25	KU4	14	5	Red	Alate	0	0	0	0	0	1	0		0	0	0	0	0	0	0	0	0	0	0	0	0	0	0	0	0	0	0	0	0	1	0	0	0	0	0	0	1	0
K82-1	2012-10-25	KU4	14	5	Red	Apterous	0	0	0	0	0	0	0		0	0	0	0	0	0	0	0	0	0	0	0	0	0	0	0	0	0	0	0	0	0	1	0	0	0	0	0	0	0
K82-10	2012-10-25	KU4	14	4	Red	Apterous	0	0	0	0	0	0	0		0	0	0	0	0	0	0	0	0	0	0	0	0	0	0	0	0	0	0	0	0	0	1	0	0	0	0	0	0	0
K82-11	2012-10-25	KU4	14	4	Red	Apterous	1	0	1	0	0	0	0		0	1	0	0	0	0	0	0	0	0	0	0	0	0	0	0	0	0	0	0	0	2	0	0	0	0	0	0	0	0
K82-12	2012-10-25	KU4	14	4	Red	Apterous	1	0	0	1	0	1	0		0	0	1	0	1	0	0	0	0	0	0	0	0	0	0	0	1	0	0	0	0	3	0	0	0	0	0	0	0	0
K82-13	2012-10-25	KU4	14	5	Green	Apterous	1	1	0	0	0	1	0		1	0	0	0	1	0	0	0	0	1	0	0	0	0	0	0	0	0	0	0	0	3	0	0	0	0	0	0	0	0
K82-14	2012-10-25	KU4	14	5	Green	Apterous	0	0	0	0	0	0	0		0	0	0	0	0	0	0	0	0	0	0	0	0	0	0	0	0	0	0	0	0	0	1	0	0	0	0	0	0	0
K82-15	2012-10-25	KU4	14	5	Green	Alate	0	0	0	0	0	1	0		0	0	0	0	0	0	0	0	0	0	0	0	0	0	0	0	0	0	0	0	0	1	0	0	0	0	0	0	1	0
K82-16	2012-10-25	KU4	14	5	Green	Apterous	0	0	0	0	0	1	0		0	0	0	0	0	0	0	0	0	0	0	0	0	0	0	0	0	0	0	0	0	1	0	0	0	0	0	0	1	0
K82-17	2012-10-25	KU4	14	5	Green	Apterous	0	1	1	0	0	0	0		0	0	0	0	0	0	1	0	0	0	0	0	0	0	0	0	0	0	0	0	0	2	0	0	0	0	0	0	0	0
K82-18	2012-10-25	KU4	14	5	Green	Apterous	1	0	0	0	0	1	0		0	0	0	0	1	0	0	0	0	0	0	0	0	0	0	0	0	0	0	0	0	2	0	0	0	0	0	0	0	0
K82-4	2012-10-25	KU4	14	5	Red	Alate	1	0	0	0	0	0	0		0	0	0	0	0	0	0	0	0	0	0	0	0	0	0	0	0	0	0	0	0	1	0	1	0	0	0	0	0	0
K82-8	2012-10-25	KU4	14	5	Red	Alate	0	0	0	1	1	0	0		0	0	0	0	0	0	0	0	0	0	0	0	0	0	0	1	0	0	0	0	0	2	0	0	0	0	0	0	0	0
K82-19	2012-10-25	KU4	14	5	Green	Alate	1	0	0	1	0	0	0		0	0	1	0	0	0	0	0	0	0	0	0	0	0	0	0	0	0	0	0	0	2	0	0	0	0	0	0	0	0
K82-2	2012-10-25	KU4	14	4	Red	Apterous	1	0	0	1	0	0	0		0	0	1	0	0	0	0	0	0	0	0	0	0	0	0	0	0	0	0	0	0	2	0	0	0	0	0	0	0	0
K82-20	2012-10-25	KU4	14	5	Green	Apterous	1	1	0	0	0	0	0		1	0	0	0	0	0	0	0	0	0	0	0	0	0	0	0	0	0	0	0	0	2	0	0	0	0	0	0	0	0
K82-21	2012-10-25	KU4	14	5	Green	Alate	1	0	0	0	0	0	0		0	0	0	0	0	0	0	0	0	0	0	0	0	0	0	0	0	0	0	0	0	1	0	1	0	0	0	0	0	0
K82-22	2012-10-25	KU4	14	5	Green	Apterous	1	1	0	0	0	0	0		1	0	0	0	0	0	0	0	0	0	0	0	0	0	0	0	0	0	0	0	0	2	0	0	0	0	0	0	0	0
K82-3	2012-10-25	KU4	14	5	Red	Apterous	0	0	0	0	0	0	0		0	0	0	0	0	0	0	0	0	0	0	0	0	0	0	0	0	0	0	0	0	0	1	0	0	0	0	0	0	0
K82-5	2012-10-25	KU4	14	4	Red	Apterous	1	1	0	0	0	0	0		1	0	0	0	0	0	0	0	0	0	0	0	0	0	0	0	0	0	0	0	0	2	0	0	0	0	0	0	0	0
K82-6	2012-10-25	KU4	14	3	Red	Apterous	1	0	0	0	0	0	0		0	0	0	0	0	0	0	0	0	0	0	0	0	0	0	0	0	0	0	0	0	1	0	1	0	0	0	0	0	0
K82-7	2012-10-25	KU4	14	5	Red	Apterous	1	0	0	1	0	0	0		0	0	1	0	0	0	0	0	0	0	0	0	0	0	0	0	0	0	0	0	0	2	0	0	0	0	0	0	0	0
K82-23	2012-10-25	KU4	14	5	Green	Apterous	0	0	0	0	0	0	0		0	0	0	0	0	0	0	0	0	0	0	0	0	0	0	0	0	0	0	0	0	0	1	0	0	0	0	0	0	0
K82-24	2012-10-25	KU4	14	5	Green	Apterous	0	0	0	0	0	1	0		0	0	0	0	0	0	0	0	0	0	0	0	0	0	0	0	0	0	0	0	0	1	0	0	0	0	0	0	1	0
K83-5	2012-10-25	KU5	14	4	Green	Apterous	0	0	0	1	0	1	0		0	0	0	0	0	0	0	0	0	0	0	0	0	0	0	0	1	0	0	0	0	2	0	0	0	0	0	0	0	0
K83-1	2012-10-25	KU5	14	5	Green	Apterous	0	1	0	0	0	0	0		0	0	0	0	0	0	0	0	0	0	0	0	0	0	0	0	0	0	0	0	0	1	0	0	1	0	0	0	0	0
K83-10	2012-10-25	KU5	14	5	Green	Apterous	0	1	0	0	0	0	0		0	0	0	0	0	0	0	0	0	0	0	0	0	0	0	0	0	0	0	0	0	1	0	0	1	0	0	0	0	0
K83-12A	2012-10-25	KU5	14	5	Green	Apterous	0	0	0	0	0	0	0		0	0	0	0	0	0	0	0	0	0	0	0	0	0	0	0	0	0	0	0	0	0	1	0	0	0	0	0	0	0
K83-12B	2012-10-25	KU5	14	3	Green	Apterous	0	0	0	0	0	0	0		0	0	0	0	0	0	0	0	0	0	0	0	0	0	0	0	0	0	0	0	0	0	1	0	0	0	0	0	0	0
K83-13	2012-10-25	KU5	14	5	Red	Apterous	0	0	0	0	0	0	0		0	0	0	0	0	0	0	0	0	0	0	0	0	0	0	0	0	0	0	0	0	0	1	0	0	0	0	0	0	0
K83-14	2012-10-25	KU5	14	5	Red	Alate	0	0	1	0	0	0	0		0	0	0	0	0	0	0	0	0	0	0	0	0	0	0	0	0	0	0	0	0	1	0	0	0	1	0	0	0	0
K83-15	2012-10-25	KU5	14	5	Red	Apterous	0	0	0	0	0	0	0		0	0	0	0	0	0	0	0	0	0	0	0	0	0	0	0	0	0	0	0	0	0	1	0	0	0	0	0	0	0
K83-17	2012-10-25	KU5	14	5	Red	Apterous	0	0	0	0	0	0	0		0	0	0	0	0	0	0	0	0	0	0	0	0	0	0	0	0	0	0	0	0	0	1	0	0	0	0	0	0	0
K83-18	2012-10-25	KU5	14	5	Red	Apterous	0	0	0	0	0	0	0		0	0	0	0	0	0	0	0	0	0	0	0	0	0	0	0	0	0	0	0	0	0	1	0	0	0	0	0	0	0
K83-2	2012-10-25	KU5	14	5	Green	Apterous	0	0	0	0	0	0	0		0	0	0	0	0	0	0	0	0	0	0	0	0	0	0	0	0	0	0	0	0	0	1	0	0	0	0	0	0	0
K83-20	2012-10-25	KU5	14	4	Red	Apterous	0	0	0	0	0	0	0		0	0	0	0	0	0	0	0	0	0	0	0	0	0	0	0	0	0	0	0	0	0	1	0	0	0	0	0	0	0
K83-21	2012-10-25	KU5	14	4	Red	Apterous	0	1	0	0	0	0	0		0	0	0	0	0	0	0	0	0	0	0	0	0	0	0	0	0	0	0	0	0	1	0	0	1	0	0	0	0	0
K83-22	2012-10-25	KU5	14	3	Red	Apterous	0	0	0	0	0	0	0		0	0	0	0	0	0	0	0	0	0	0	0	0	0	0	0	0	0	0	0	0	0	1	0	0	0	0	0	0	0
K83-23	2012-10-25	KU5	14	4	Red	Apterous	1	0	0	1	0	0	0		0	0	1	0	0	0	0	0	0	0	0	0	0	0	0	0	0	0	0	0	0	2	0	0	0	0	0	0	0	0
K83-24	2012-10-25	KU5	14	3	Red	Apterous	1	0	0	1	0	0	0		0	0	1	0	0	0	0	0	0	0	0	0	0	0	0	0	0	0	0	0	0	2	0	0	0	0	0	0	0	0
K83-4B	2012-10-25	KU5	14	5	Red	Apterous	0	1	0	0	1	0	0		0	0	0	0	0	0	0	0	1	0	0	0	0	0	0	0	0	0	0	0	0	2	0	0	0	0	0	0	0	0
K83-6	2012-10-25	KU5	14	4	Green	Apterous	0	0	0	0	0	0	0		0	0	0	0	0	0	0	0	0	0	0	0	0	0	0	0	0	0	0	0	0	0	1	0	0	0	0	0	0	0
K83-7	2012-10-25	KU5	14	4	Green	Apterous	0	0	0	0	0	0	0		0	0	0	0	0	0	0	0	0	0	0	0	0	0	0	0	0	0	0	0	0	0	1	0	0	0	0	0	0	0
K83-9	2012-10-25	KU5	14	3	Green	Apterous	0	0	0	0	0	0	0		0	0	0	0	0	0	0	0	0	0	0	0	0	0	0	0	0	0	0	0	0	0	1	0	0	0	0	0	0	0
K83-16	2012-10-25	KU5	14	5	Red	Apterous	0	0	1	0	0	0	0		0	0	0	0	0	0	0	0	0	0	0	0	0	0	0	0	0	0	0	0	0	1	0	0	0	1	0	0	0	0
K83-3	2012-10-25	KU5	14	4	Green	Apterous	0	0	1	0	0	0	0		0	0	0	0	0	0	0	0	0	0	0	0	0	0	0	0	0	0	0	0	0	1	0	0	0	1	0	0	0	0
K83-4	2012-10-25	KU5	14	5	Green	Apterous	0	0	1	0	0	0	0		0	0	0	0	0	0	0	0	0	0	0	0	0	0	0	0	0	0	0	0	0	1	0	0	0	1	0	0	0	0
K83-8	2012-10-25	KU5	14	3	Green	Apterous	0	0	0	0	0	0	0		0	0	0	0	0	0	0	0	0	0	0	0	0	0	0	0	0	0	0	0	0	0	1	0	0	0	0	0	0	0
K84-1	2013-05-10	KU1	15	5	Red		1	0	0	0	0	0	0		0	0	0	0	0	0	0	0	0	0	0	0	0	0	0	0	0	0	0	0	0	1	0	1	0	0	0	0	0	0
K84-10	2013-05-10	KU1	15	4	Red		0	0	0	0	0	0	0		0	0	0	0	0	0	0	0	0	0	0	0	0	0	0	0	0	0	0	0	0	0	1	0	0	0	0	0	0	0
K84-11	2013-05-10	KU1	15	3	Red		0	0	0	0	0	0	0		0	0	0	0	0	0	0	0	0	0	0	0	0	0	0	0	0	0	0	0	0	0	1	0	0	0	0	0	0	0
K84-12	2013-05-10	KU1	15	2	Red		0	0	0	0	0	0	0		0	0	0	0	0	0	0	0	0	0	0	0	0	0	0	0	0	0	0	0	0	0	1	0	0	0	0	0	0	0
K84-13	2013-05-10	KU1	15	2	Red		0	0	0	0	0	1	0		0	0	0	0	0	0	0	0	0	0	0	0	0	0	0	0	0	0	0	0	0	1	0	0	0	0	0	0	1	0
K84-14	2013-05-10	KU1	15	2	Red		0	0	0	0	0	0	0		0	0	0	0	0	0	0	0	0	0	0	0	0	0	0	0	0	0	0	0	0	0	1	0	0	0	0	0	0	0
K84-15	2013-05-10	KU1	15	5	Green		0	0	1	0	0	1	0		0	0	0	0	0	0	0	0	0	0	0	0	0	1	0	0	0	0	0	0	0	2	0	0	0	0	0	0	0	0
K84-16	2013-05-10	KU1	15	5	Green		0	0	1	0	0	1	0		0	0	0	0	0	0	0	0	0	0	0	0	0	1	0	0	0	0	0	0	0	2	0	0	0	0	0	0	0	0
K84-17	2013-05-10	KU1	15	5	Green		0	0	0	0	0	1	0		0	0	0	0	0	0	0	0	0	0	0	0	0	0	0	0	0	0	0	0	0	1	0	0	0	0	0	0	1	0
K84-18	2013-05-10	KU1	15	5	Green		1	1	0	0	0	0	0		1	0	0	0	0	0	0	0	0	0	0	0	0	0	0	0	0	0	0	0	0	2	0	0	0	0	0	0	0	0
K84-19	2013-05-10	KU1	15	5	Green		0	0	0	0	0	1	0		0	0	0	0	0	0	0	0	0	0	0	0	0	0	0	0	0	0	0	0	0	1	0	0	0	0	0	0	1	0
K84-2	2013-05-10	KU1	15	5	Red		0	0	0	1	0	0	0		0	0	0	0	0	0	0	0	0	0	0	0	0	0	0	0	0	0	0	0	0	1	0	0	0	0	1	0	0	0
K84-20	2013-05-10	KU1	15	5	Green		0	0	1	0	0	1	0		0	0	0	0	0	0	0	0	0	0	0	0	0	1	0	0	0	0	0	0	0	2	0	0	0	0	0	0	0	0
K84-21	2013-05-10	KU1	15	5	Green		0	0	1	0	0	1	0		0	0	0	0	0	0	0	0	0	0	0	0	0	1	0	0	0	0	0	0	0	2	0	0	0	0	0	0	0	0
K84-22	2013-05-10	KU1	15	5	Green		1	1	0	0	0	0	0		1	0	0	0	0	0	0	0	0	0	0	0	0	0	0	0	0	0	0	0	0	2	0	0	0	0	0	0	0	0
K84-23	2013-05-10	KU1	15	5	Green		0	0	0	0	0	0	0		0	0	0	0	0	0	0	0	0	0	0	0	0	0	0	0	0	0	0	0	0	0	1	0	0	0	0	0	0	0
K84-24	2013-05-10	KU1	15	5	Green		0	0	0	0	0	0	0		0	0	0	0	0	0	0	0	0	0	0	0	0	0	0	0	0	0	0	0	0	0	1	0	0	0	0	0	0	0
K84-25	2013-05-10	KU1	15	5	Green		0	0	1	1	0	0	0		0	0	0	0	0	0	0	0	0	0	0	1	0	0	0	0	0	0	0	0	0	2	0	0	0	0	0	0	0	0
K84-26	2013-05-10	KU1	15	5	Green		0	0	0	0	0	0	0		0	0	0	0	0	0	0	0	0	0	0	0	0	0	0	0	0	0	0	0	0	0	1	0	0	0	0	0	0	0
K84-27	2013-05-10	KU1	15	5	Green		0	0	0	0	1	0	0		0	0	0	0	0	0	0	0	0	0	0	0	0	0	0	0	0	0	0	0	0	1	0	0	0	0	0	1	0	0
K84-28	2013-05-10	KU1	15	5	Green		0	0	0	0	0	0	0		0	0	0	0	0	0	0	0	0	0	0	0	0	0	0	0	0	0	0	0	0	0	1	0	0	0	0	0	0	0
K84-3	2013-05-10	KU1	15	5	Red		0	0	0	0	0	0	0		0	0	0	0	0	0	0	0	0	0	0	0	0	0	0	0	0	0	0	0	0	0	1	0	0	0	0	0	0	0
K84-4	2013-05-10	KU1	15	5	Red		1	0	0	0	0	0	0		0	0	0	0	0	0	0	0	0	0	0	0	0	0	0	0	0	0	0	0	0	1	0	1	0	0	0	0	0	0
K84-5	2013-05-10	KU1	15	5	Red		1	0	0	0	0	0	0		0	0	0	0	0	0	0	0	0	0	0	0	0	0	0	0	0	0	0	0	0	1	0	1	0	0	0	0	0	0
K84-6	2013-05-10	KU1	15	5	Red		1	0	0	1	1	0	0		0	0	1	1	0	0	0	0	0	0	0	0	0	0	0	1	0	0	0	0	0	3	0	0	0	0	0	0	0	0
K84-7	2013-05-10	KU1	15	5	Red		1	1	0	0	0	1	0		1	0	0	0	1	0	0	0	0	1	0	0	0	0	0	0	0	0	0	0	0	3	0	0	0	0	0	0	0	0
K84-8	2013-05-10	KU1	15	5	Red		0	0	0	1	0	0	0		0	0	0	0	0	0	0	0	0	0	0	0	0	0	0	0	0	0	0	0	0	1	0	0	0	0	1	0	0	0
K84-9	2013-05-10	KU1	15	5	Red		0	0	0	0	0	0	0		0	0	0	0	0	0	0	0	0	0	0	0	0	0	0	0	0	0	0	0	0	0	1	0	0	0	0	0	0	0
K85-1	2013-05-10	KU2	15	5	Green		0	0	1	0	0	1	0		0	0	0	0	0	0	0	0	0	0	0	0	0	1	0	0	0	0	0	0	0	2	0	0	0	0	0	0	0	0
K85-10	2013-05-10	KU2	15	5	Green		0	0	1	0	0	1	0		0	0	0	0	0	0	0	0	0	0	0	0	0	1	0	0	0	0	0	0	0	2	0	0	0	0	0	0	0	0
K85-11	2013-05-10	KU2	15	5	Green		0	0	1	1	0	0	0		0	0	0	0	0	0	0	0	0	0	0	1	0	0	0	0	0	0	0	0	0	2	0	0	0	0	0	0	0	0
K85-12	2013-05-10	KU2	15	5	Green		0	0	1	0	0	1	0		0	0	0	0	0	0	0	0	0	0	0	0	0	1	0	0	0	0	0	0	0	2	0	0	0	0	0	0	0	0
K85-13	2013-05-10	KU2	15	5	Green		1	1	1	0	0	0	0		1	1	0	0	0	0	1	0	0	0	0	0	0	0	0	0	0	0	0	0	0	3	0	0	0	0	0	0	0	0
K85-14	2013-05-10	KU2	15	5	Green		1	0	0	0	0	0	0		0	0	0	0	0	0	0	0	0	0	0	0	0	0	0	0	0	0	0	0	0	1	0	1	0	0	0	0	0	0
K85-15	2013-05-10	KU2	15	5	Green		0	0	0	0	0	1	0		0	0	0	0	0	0	0	0	0	0	0	0	0	0	0	0	0	0	0	0	0	1	0	0	0	0	0	0	1	0
K85-16	2013-05-10	KU2	15	4	Green		0	0	1	0	0	1	0		0	0	0	0	0	0	0	0	0	0	0	0	0	1	0	0	0	0	0	0	0	2	0	0	0	0	0	0	0	0
K85-17	2013-05-10	KU2	15	3	Green		0	1	0	0	0	0	0		0	0	0	0	0	0	0	0	0	0	0	0	0	0	0	0	0	0	0	0	0	1	0	0	1	0	0	0	0	0
K85-18	2013-05-10	KU2	15	3	Green		0	0	0	0	0	1	0		0	0	0	0	0	0	0	0	0	0	0	0	0	0	0	0	0	0	0	0	0	1	0	0	0	0	0	0	1	0
K85-19	2013-05-10	KU2	15	3	Green		1	0	0	0	0	0	0		0	0	0	0	0	0	0	0	0	0	0	0	0	0	0	0	0	0	0	0	0	1	0	1	0	0	0	0	0	0
K85-2	2013-05-10	KU2	15	5	Green		0	0	1	0	0	1	0		0	0	0	0	0	0	0	0	0	0	0	0	0	1	0	0	0	0	0	0	0	2	0	0	0	0	0	0	0	0
K85-20	2013-05-10	KU2	15	3	Green		1	0	0	0	0	0	0		0	0	0	0	0	0	0	0	0	0	0	0	0	0	0	0	0	0	0	0	0	1	0	1	0	0	0	0	0	0
K85-21	2013-05-10	KU2	15	3	Green		0	0	0	0	0	0	0		0	0	0	0	0	0	0	0	0	0	0	0	0	0	0	0	0	0	0	0	0	0	1	0	0	0	0	0	0	0
K85-22	2013-05-10	KU2	15	3	Green		0	0	1	0	0	0	0		0	0	0	0	0	0	0	0	0	0	0	0	0	0	0	0	0	0	0	0	0	1	0	0	0	1	0	0	0	0
K85-23	2013-05-10	KU2	15	3	Green		0	0	0	0	0	1	0		0	0	0	0	0	0	0	0	0	0	0	0	0	0	0	0	0	0	0	0	0	1	0	0	0	0	0	0	1	0
K85-24	2013-05-10	KU2	15	5	Red		0	0	0	0	0	0	0		0	0	0	0	0	0	0	0	0	0	0	0	0	0	0	0	0	0	0	0	0	0	1	0	0	0	0	0	0	0
K85-3	2013-05-10	KU2	15	5	Green		1	1	0	0	0	0	0		1	0	0	0	0	0	0	0	0	0	0	0	0	0	0	0	0	0	0	0	0	2	0	0	0	0	0	0	0	0
K85-4	2013-05-10	KU2	15	5	Green		0	0	0	0	0	1	0		0	0	0	0	0	0	0	0	0	0	0	0	0	0	0	0	0	0	0	0	0	1	0	0	0	0	0	0	1	0
K85-5	2013-05-10	KU2	15	5	Green		0	0	1	0	0	1	0		0	0	0	0	0	0	0	0	0	0	0	0	0	1	0	0	0	0	0	0	0	2	0	0	0	0	0	0	0	0
K85-6	2013-05-10	KU2	15	5	Green		0	0	1	0	0	1	0		0	0	0	0	0	0	0	0	0	0	0	0	0	1	0	0	0	0	0	0	0	2	0	0	0	0	0	0	0	0
K85-7	2013-05-10	KU2	15	5	Green		0	0	0	0	0	0	1		0	0	0	0	0	0	0	0	0	0	0	0	0	0	0	0	0	0	0	0	0	1	0	0	0	0	0	0	0	1
K85-8	2013-05-10	KU2	15	5	Green		0	0	0	0	0	1	1		0	0	0	0	0	0	0	0	0	0	0	0	0	0	0	0	0	0	0	0	1	2	0	0	0	0	0	0	0	0
K85-9	2013-05-10	KU2	15	5	Green		0	0	0	0	0	0	0		0	0	0	0	0	0	0	0	0	0	0	0	0	0	0	0	0	0	0	0	0	0	1	0	0	0	0	0	0	0
K86-1	2013-05-10	KU3	15	5	Green		0	0	0	0	0	1	0		0	0	0	0	0	0	0	0	0	0	0	0	0	0	0	0	0	0	0	0	0	1	0	0	0	0	0	0	1	0
K86-10	2013-05-10	KU3	15	4	Green		0	0	0	0	0	1	0		0	0	0	0	0	0	0	0	0	0	0	0	0	0	0	0	0	0	0	0	0	1	0	0	0	0	0	0	1	0
K86-11	2013-05-10	KU3	15	4	Green		0	1	0	0	0	0	0		0	0	0	0	0	0	0	0	0	0	0	0	0	0	0	0	0	0	0	0	0	1	0	0	1	0	0	0	0	0
K86-12	2013-05-10	KU3	15	3	Green		0	0	0	0	0	1	0		0	0	0	0	0	0	0	0	0	0	0	0	0	0	0	0	0	0	0	0	0	1	0	0	0	0	0	0	1	0
K86-13	2013-05-10	KU3	15	5	Red		0	0	0	0	0	0	0		0	0	0	0	0	0	0	0	0	0	0	0	0	0	0	0	0	0	0	0	0	0	1	0	0	0	0	0	0	0
K86-14	2013-05-10	KU3	15	5	Red		0	0	0	0	0	0	0		0	0	0	0	0	0	0	0	0	0	0	0	0	0	0	0	0	0	0	0	0	0	1	0	0	0	0	0	0	0
K86-15	2013-05-10	KU3	15	5	Red		0	0	0	0	0	0	0		0	0	0	0	0	0	0	0	0	0	0	0	0	0	0	0	0	0	0	0	0	0	1	0	0	0	0	0	0	0
K86-16	2013-05-10	KU3	15	4	Red		1	0	0	0	0	0	0		0	0	0	0	0	0	0	0	0	0	0	0	0	0	0	0	0	0	0	0	0	1	0	1	0	0	0	0	0	0
K86-17	2013-05-10	KU3	15	3	Red		1	0	0	0	0	0	0		0	0	0	0	0	0	0	0	0	0	0	0	0	0	0	0	0	0	0	0	0	1	0	1	0	0	0	0	0	0
K86-18	2013-05-10	KU3	15	3	Red		1	0	0	0	0	0	0		0	0	0	0	0	0	0	0	0	0	0	0	0	0	0	0	0	0	0	0	0	1	0	1	0	0	0	0	0	0
K86-19	2013-05-10	KU3	15	3	Red		0	0	0	1	0	0	0		0	0	0	0	0	0	0	0	0	0	0	0	0	0	0	0	0	0	0	0	0	1	0	0	0	0	1	0	0	0
K86-2	2013-05-10	KU3	15	5	Green		0	1	0	0	0	0	0		0	0	0	0	0	0	0	0	0	0	0	0	0	0	0	0	0	0	0	0	0	1	0	0	1	0	0	0	0	0
K86-20	2013-05-10	KU3	15	3	Red		1	0	0	0	0	0	0		0	0	0	0	0	0	0	0	0	0	0	0	0	0	0	0	0	0	0	0	0	1	0	1	0	0	0	0	0	0
K86-21	2013-05-10	KU3	15	3	Red		0	0	0	0	0	0	0		0	0	0	0	0	0	0	0	0	0	0	0	0	0	0	0	0	0	0	0	0	0	1	0	0	0	0	0	0	0
K86-22	2013-05-10	KU3	15	3	Red		0	0	0	0	0	0	0		0	0	0	0	0	0	0	0	0	0	0	0	0	0	0	0	0	0	0	0	0	0	1	0	0	0	0	0	0	0
K86-23	2013-05-10	KU3	15	3	Red		0	0	0	0	0	0	0		0	0	0	0	0	0	0	0	0	0	0	0	0	0	0	0	0	0	0	0	0	0	1	0	0	0	0	0	0	0
K86-24	2013-05-10	KU3	15	3	Red		1	0	0	0	0	0	0		0	0	0	0	0	0	0	0	0	0	0	0	0	0	0	0	0	0	0	0	0	1	0	1	0	0	0	0	0	0
K86-3	2013-05-10	KU3	15	5	Green		0	0	0	0	0	0	0		0	0	0	0	0	0	0	0	0	0	0	0	0	0	0	0	0	0	0	0	0	0	1	0	0	0	0	0	0	0
K86-4	2013-05-10	KU3	15	5	Green		1	0	0	0	0	0	0		0	0	0	0	0	0	0	0	0	0	0	0	0	0	0	0	0	0	0	0	0	1	0	1	0	0	0	0	0	0
K86-5	2013-05-10	KU3	15	5	Green		0	0	0	0	0	0	1		0	0	0	0	0	0	0	0	0	0	0	0	0	0	0	0	0	0	0	0	0	1	0	0	0	0	0	0	0	1
K86-6	2013-05-10	KU3	15	5	Green		0	0	1	0	0	1	0		0	0	0	0	0	0	0	0	0	0	0	0	0	1	0	0	0	0	0	0	0	2	0	0	0	0	0	0	0	0
K86-7	2013-05-10	KU3	15	5	Green		0	0	0	0	0	0	0		0	0	0	0	0	0	0	0	0	0	0	0	0	0	0	0	0	0	0	0	0	0	1	0	0	0	0	0	0	0
K86-8	2013-05-10	KU3	15	5	Green		1	0	0	0	0	0	0		0	0	0	0	0	0	0	0	0	0	0	0	0	0	0	0	0	0	0	0	0	1	0	1	0	0	0	0	0	0
K86-9	2013-05-10	KU3	15	5	Green		1	1	0	0	0	0	0		1	0	0	0	0	0	0	0	0	0	0	0	0	0	0	0	0	0	0	0	0	2	0	0	0	0	0	0	0	0
K87-1	2013-05-10	KU4	15	5	Green		1	0	0	0	0	0	0		0	0	0	0	0	0	0	0	0	0	0	0	0	0	0	0	0	0	0	0	0	1	0	1	0	0	0	0	0	0
K87-10	2013-05-10	KU4	15	5	Green		0	1	0	0	0	0	0		0	0	0	0	0	0	0	0	0	0	0	0	0	0	0	0	0	0	0	0	0	1	0	0	1	0	0	0	0	0
K87-11	2013-05-10	KU4	15	5	Green		1	0	0	0	0	0	0		0	0	0	0	0	0	0	0	0	0	0	0	0	0	0	0	0	0	0	0	0	1	0	1	0	0	0	0	0	0
K87-12	2013-05-10	KU4	15	5	Green		0	0	1	0	0	0	0		0	0	0	0	0	0	0	0	0	0	0	0	0	0	0	0	0	0	0	0	0	1	0	0	0	1	0	0	0	0
K87-13	2013-05-10	KU4	15	5	Green		1	0	0	0	0	0	1		0	0	0	0	0	1	0	0	0	0	0	0	0	0	0	0	0	0	0	0	0	2	0	0	0	0	0	0	0	0
K87-14	2013-05-10	KU4	15	5	Green		0	0	0	0	0	1	0		0	0	0	0	0	0	0	0	0	0	0	0	0	0	0	0	0	0	0	0	0	1	0	0	0	0	0	0	1	0
K87-15	2013-05-10	KU4	15	5	Green		0	0	1	0	0	1	0		0	0	0	0	0	0	0	0	0	0	0	0	0	1	0	0	0	0	0	0	0	2	0	0	0	0	0	0	0	0
K87-16	2013-05-10	KU4	15	5	Green		0	1	1	0	0	1	0		0	0	0	0	0	0	1	0	0	1	0	0	0	1	0	0	0	0	0	0	0	3	0	0	0	0	0	0	0	0
K87-17	2013-05-10	KU4	15	5	Red		1	0	0	0	0	0	0		0	0	0	0	0	0	0	0	0	0	0	0	0	0	0	0	0	0	0	0	0	1	0	1	0	0	0	0	0	0
K87-18	2013-05-10	KU4	15	5	Red		1	0	0	0	0	1	0		0	0	0	0	1	0	0	0	0	0	0	0	0	0	0	0	0	0	0	0	0	2	0	0	0	0	0	0	0	0
K87-19	2013-05-10	KU4	15	5	Red		1	0	1	0	0	1	0		0	1	0	0	1	0	0	0	0	0	0	0	0	1	0	0	0	0	0	0	0	3	0	0	0	0	0	0	0	0
K87-2	2013-05-10	KU4	15	5	Green		0	0	0	0	0	0	0		0	0	0	0	0	0	0	0	0	0	0	0	0	0	0	0	0	0	0	0	0	0	1	0	0	0	0	0	0	0
K87-20	2013-05-10	KU4	15	5	Red		0	0	0	0	0	0	0		0	0	0	0	0	0	0	0	0	0	0	0	0	0	0	0	0	0	0	0	0	0	1	0	0	0	0	0	0	0
K87-21	2013-05-10	KU4	15	5	Red		0	0	0	0	0	0	0		0	0	0	0	0	0	0	0	0	0	0	0	0	0	0	0	0	0	0	0	0	0	1	0	0	0	0	0	0	0
K87-22	2013-05-10	KU4	15	5	Red		0	0	0	0	0	0	0		0	0	0	0	0	0	0	0	0	0	0	0	0	0	0	0	0	0	0	0	0	0	1	0	0	0	0	0	0	0
K87-23	2013-05-10	KU4	15	5	Red		1	0	0	0	0	0	0		0	0	0	0	0	0	0	0	0	0	0	0	0	0	0	0	0	0	0	0	0	1	0	1	0	0	0	0	0	0
K87-24	2013-05-10	KU4	15	5	Red		1	1	0	0	0	0	0		1	0	0	0	0	0	0	0	0	0	0	0	0	0	0	0	0	0	0	0	0	2	0	0	0	0	0	0	0	0
K87-3	2013-05-10	KU4	15	5	Green		0	0	1	0	0	1	0		0	0	0	0	0	0	0	0	0	0	0	0	0	1	0	0	0	0	0	0	0	2	0	0	0	0	0	0	0	0
K87-4	2013-05-10	KU4	15	5	Green		0	0	0	0	0	0	0		0	0	0	0	0	0	0	0	0	0	0	0	0	0	0	0	0	0	0	0	0	0	1	0	0	0	0	0	0	0
K87-5	2013-05-10	KU4	15	5	Green		0	0	1	0	0	0	0		0	0	0	0	0	0	0	0	0	0	0	0	0	0	0	0	0	0	0	0	0	1	0	0	0	1	0	0	0	0
K87-6	2013-05-10	KU4	15	5	Green		0	0	0	1	0	0	0		0	0	0	0	0	0	0	0	0	0	0	0	0	0	0	0	0	0	0	0	0	1	0	0	0	0	1	0	0	0
K87-7	2013-05-10	KU4	15	5	Green		1	0	0	0	0	0	1		0	0	0	0	0	1	0	0	0	0	0	0	0	0	0	0	0	0	0	0	0	2	0	0	0	0	0	0	0	0
K87-8	2013-05-10	KU4	15	5	Green		0	0	0	0	0	0	0		0	0	0	0	0	0	0	0	0	0	0	0	0	0	0	0	0	0	0	0	0	0	1	0	0	0	0	0	0	0
K87-9	2013-05-10	KU4	15	5	Green		0	0	1	0	0	1	0		0	0	0	0	0	0	0	0	0	0	0	0	0	1	0	0	0	0	0	0	0	2	0	0	0	0	0	0	0	0
K88-1	2013-05-10	KU5	15	5	Green		0	0	1	0	0	1	0		0	0	0	0	0	0	0	0	0	0	0	0	0	1	0	0	0	0	0	0	0	2	0	0	0	0	0	0	0	0
K88-10	2013-05-10	KU5	15	3	Green		1	0	0	0	0	0	0		0	0	0	0	0	0	0	0	0	0	0	0	0	0	0	0	0	0	0	0	0	1	0	1	0	0	0	0	0	0
K88-11	2013-05-10	KU5	15	3	Green		1	0	0	0	1	0	0		0	0	0	1	0	0	0	0	0	0	0	0	0	0	0	0	0	0	0	0	0	2	0	0	0	0	0	0	0	0
K88-12	2013-05-10	KU5	15	3	Green		0	0	0	0	0	1	0		0	0	0	0	0	0	0	0	0	0	0	0	0	0	0	0	0	0	0	0	0	1	0	0	0	0	0	0	1	0
K88-13	2013-05-10	KU5	15	5	Red		0	0	0	0	0	0	0		0	0	0	0	0	0	0	0	0	0	0	0	0	0	0	0	0	0	0	0	0	0	1	0	0	0	0	0	0	0
K88-14	2013-05-10	KU5	15	5	Red		1	0	0	0	1	0	0		0	0	0	1	0	0	0	0	0	0	0	0	0	0	0	0	0	0	0	0	0	2	0	0	0	0	0	0	0	0
K88-15	2013-05-10	KU5	15	5	Red		1	0	0	0	1	0	0		0	0	0	1	0	0	0	0	0	0	0	0	0	0	0	0	0	0	0	0	0	2	0	0	0	0	0	0	0	0
K88-16	2013-05-10	KU5	15	5	Red		1	0	0	0	0	0	0		0	0	0	0	0	0	0	0	0	0	0	0	0	0	0	0	0	0	0	0	0	1	0	1	0	0	0	0	0	0
K88-17	2013-05-10	KU5	15	5	Red		1	0	0	1	1	0	0		0	0	1	1	0	0	0	0	0	0	0	0	0	0	0	1	0	0	0	0	0	3	0	0	0	0	0	0	0	0
K88-18	2013-05-10	KU5	15	4	Red		0	0	0	0	0	0	0		0	0	0	0	0	0	0	0	0	0	0	0	0	0	0	0	0	0	0	0	0	0	1	0	0	0	0	0	0	0
K88-19	2013-05-10	KU5	15	4	Red		1	0	0	0	1	0	0		0	0	0	1	0	0	0	0	0	0	0	0	0	0	0	0	0	0	0	0	0	2	0	0	0	0	0	0	0	0
K88-2	2013-05-10	KU5	15	5	Green		0	0	0	0	0	1	0		0	0	0	0	0	0	0	0	0	0	0	0	0	0	0	0	0	0	0	0	0	1	0	0	0	0	0	0	1	0
K88-20	2013-05-10	KU5	15	3	Red		1	0	0	0	0	0	0		0	0	0	0	0	0	0	0	0	0	0	0	0	0	0	0	0	0	0	0	0	1	0	1	0	0	0	0	0	0
K88-21	2013-05-10	KU5	15	3	Red		1	0	0	1	0	0	0		0	0	1	0	0	0	0	0	0	0	0	0	0	0	0	0	0	0	0	0	0	2	0	0	0	0	0	0	0	0
K88-22	2013-05-10	KU5	15	3	Red		1	0	0	1	0	0	0		0	0	1	0	0	0	0	0	0	0	0	0	0	0	0	0	0	0	0	0	0	2	0	0	0	0	0	0	0	0
K88-23	2013-05-10	KU5	15	3	Red		0	0	0	0	1	1	0		0	0	0	0	0	0	0	0	0	0	0	0	0	0	0	0	0	0	1	0	0	2	0	0	0	0	0	0	0	0
K88-24	2013-05-10	KU5	15	5	Red		1	0	0	0	0	0	0		0	0	0	0	0	0	0	0	0	0	0	0	0	0	0	0	0	0	0	0	0	1	0	1	0	0	0	0	0	0
K88-3	2013-05-10	KU5	15	5	Green		0	0	0	0	0	0	0		0	0	0	0	0	0	0	0	0	0	0	0	0	0	0	0	0	0	0	0	0	0	1	0	0	0	0	0	0	0
K88-4	2013-05-10	KU5	15	5	Green		0	1	0	0	0	0	0		0	0	0	0	0	0	0	0	0	0	0	0	0	0	0	0	0	0	0	0	0	1	0	0	1	0	0	0	0	0
K88-5	2013-05-10	KU5	15	5	Green		0	0	0	0	0	1	0		0	0	0	0	0	0	0	0	0	0	0	0	0	0	0	0	0	0	0	0	0	1	0	0	0	0	0	0	1	0
K88-6	2013-05-10	KU5	15	4	Green		0	0	0	0	0	1	0		0	0	0	0	0	0	0	0	0	0	0	0	0	0	0	0	0	0	0	0	0	1	0	0	0	0	0	0	1	0
K88-7	2013-05-10	KU5	15	4	Green		0	1	0	0	0	1	0		0	0	0	0	0	0	0	0	0	1	0	0	0	0	0	0	0	0	0	0	0	2	0	0	0	0	0	0	0	0
K88-8	2013-05-10	KU5	15	4	Green		0	0	0	0	0	1	0		0	0	0	0	0	0	0	0	0	0	0	0	0	0	0	0	0	0	0	0	0	1	0	0	0	0	0	0	1	0
K88-9	2013-05-10	KU5	15	3	Green		1	0	0	0	1	0	0		0	0	0	1	0	0	0	0	0	0	0	0	0	0	0	0	0	0	0	0	0	2	0	0	0	0	0	0	0	0
K89-1	2013-05-10	KU6	15	5	Green		0	0	1	0	1	0	0		0	0	0	0	0	0	0	0	0	0	0	0	1	0	0	0	0	0	0	0	0	2	0	0	0	0	0	0	0	0
K89-10	2013-05-10	KU6	15	5	Green		0	0	0	0	0	0	0		0	0	0	0	0	0	0	0	0	0	0	0	0	0	0	0	0	0	0	0	0	0	1	0	0	0	0	0	0	0
K89-11	2013-05-10	KU6	15	5	Green		0	0	1	0	0	1	0		0	0	0	0	0	0	0	0	0	0	0	0	0	1	0	0	0	0	0	0	0	2	0	0	0	0	0	0	0	0
K89-12	2013-05-10	KU6	15	5	Green		0	0	0	0	0	1	0		0	0	0	0	0	0	0	0	0	0	0	0	0	0	0	0	0	0	0	0	0	1	0	0	0	0	0	0	1	0
K89-13	2013-05-10	KU6	15	5	Green		0	1	0	0	0	1	0		0	0	0	0	0	0	0	0	0	1	0	0	0	0	0	0	0	0	0	0	0	2	0	0	0	0	0	0	0	0
K89-14	2013-05-10	KU6	15	5	Green		1	1	0	0	0	0	0		1	0	0	0	0	0	0	0	0	0	0	0	0	0	0	0	0	0	0	0	0	2	0	0	0	0	0	0	0	0
K89-15	2013-05-10	KU6	15	5	Green		0	0	1	0	0	1	0		0	0	0	0	0	0	0	0	0	0	0	0	0	1	0	0	0	0	0	0	0	2	0	0	0	0	0	0	0	0
K89-16	2013-05-10	KU6	15	5	Green		0	1	0	0	0	0	0		0	0	0	0	0	0	0	0	0	0	0	0	0	0	0	0	0	0	0	0	0	1	0	0	1	0	0	0	0	0
K89-17	2013-05-10	KU6	15	4	Green		0	0	1	0	0	1	0		0	0	0	0	0	0	0	0	0	0	0	0	0	1	0	0	0	0	0	0	0	2	0	0	0	0	0	0	0	0
K89-18	2013-05-10	KU6	15	4	Green		1	0	0	0	0	0	0		0	0	0	0	0	0	0	0	0	0	0	0	0	0	0	0	0	0	0	0	0	1	0	1	0	0	0	0	0	0
K89-19	2013-05-10	KU6	15	5	Red		0	0	0	0	0	1	0		0	0	0	0	0	0	0	0	0	0	0	0	0	0	0	0	0	0	0	0	0	1	0	0	0	0	0	0	1	0
K89-2	2013-05-10	KU6	15	5	Green		1	1	0	0	0	0	0		1	0	0	0	0	0	0	0	0	0	0	0	0	0	0	0	0	0	0	0	0	2	0	0	0	0	0	0	0	0
K89-20	2013-05-10	KU6	15	5	Red		0	0	0	0	0	0	0		0	0	0	0	0	0	0	0	0	0	0	0	0	0	0	0	0	0	0	0	0	0	1	0	0	0	0	0	0	0
K89-21	2013-05-10	KU6	15	5	Red		1	0	0	0	0	0	0		0	0	0	0	0	0	0	0	0	0	0	0	0	0	0	0	0	0	0	0	0	1	0	1	0	0	0	0	0	0
K89-22	2013-05-10	KU6	15	5	Red		0	0	0	1	0	0	0		0	0	0	0	0	0	0	0	0	0	0	0	0	0	0	0	0	0	0	0	0	1	0	0	0	0	1	0	0	0
K89-23	2013-05-10	KU6	15	5	Red		0	0	0	0	0	0	0		0	0	0	0	0	0	0	0	0	0	0	0	0	0	0	0	0	0	0	0	0	0	1	0	0	0	0	0	0	0
K89-24	2013-05-10	KU6	15	3	Red		0	0	1	0	0	1	0		0	0	0	0	0	0	0	0	0	0	0	0	0	1	0	0	0	0	0	0	0	2	0	0	0	0	0	0	0	0
K89-3	2013-05-10	KU6	15	5	Green		0	0	1	0	0	1	0		0	0	0	0	0	0	0	0	0	0	0	0	0	1	0	0	0	0	0	0	0	2	0	0	0	0	0	0	0	0
K89-4	2013-05-10	KU6	15	5	Green		0	0	0	0	0	0	0		0	0	0	0	0	0	0	0	0	0	0	0	0	0	0	0	0	0	0	0	0	0	1	0	0	0	0	0	0	0
K89-5	2013-05-10	KU6	15	5	Green		0	0	0	0	0	0	0		0	0	0	0	0	0	0	0	0	0	0	0	0	0	0	0	0	0	0	0	0	0	1	0	0	0	0	0	0	0
K89-6	2013-05-10	KU6	15	5	Green		0	0	1	0	0	1	0		0	0	0	0	0	0	0	0	0	0	0	0	0	1	0	0	0	0	0	0	0	2	0	0	0	0	0	0	0	0
K89-7	2013-05-10	KU6	15	5	Green		0	0	1	0	0	1	0		0	0	0	0	0	0	0	0	0	0	0	0	0	1	0	0	0	0	0	0	0	2	0	0	0	0	0	0	0	0
K89-8	2013-05-10	KU6	15	5	Green		0	1	0	0	1	0	0		0	0	0	0	0	0	0	0	1	0	0	0	0	0	0	0	0	0	0	0	0	2	0	0	0	0	0	0	0	0
K89-9	2013-05-10	KU6	15	5	Green		0	0	1	0	0	1	0		0	0	0	0	0	0	0	0	0	0	0	0	0	1	0	0	0	0	0	0	0	2	0	0	0	0	0	0	0	0
K90-1	2013-10-25	KU1	16	5	Green	Apterous	0	0	0	0	0	1	0		0	0	0	0	0	0	0	0	0	0	0	0	0	0	0	0	0	0	0	0	0	1	0	0	0	0	0	0	1	0
K90-10	2013-10-25	KU1	16	5	Green	Apterous	0	0	0	0	0	1	0		0	0	0	0	0	0	0	0	0	0	0	0	0	0	0	0	0	0	0	0	0	1	0	0	0	0	0	0	1	0
K90-11	2013-10-25	KU1	16	5	Green	Alate	1	1	0	0	0	0	0		1	0	0	0	0	0	0	0	0	0	0	0	0	0	0	0	0	0	0	0	0	2	0	0	0	0	0	0	0	0
K90-12	2013-10-25	KU1	16	5	Green	Apterous	1	1	0	0	0	1	0		1	0	0	0	1	0	0	0	0	1	0	0	0	0	0	0	0	0	0	0	0	3	0	0	0	0	0	0	0	0
K90-13	2013-10-25	KU1	16	4	Green	Apterous	1	0	0	0	0	0	0		0	0	0	0	0	0	0	0	0	0	0	0	0	0	0	0	0	0	0	0	0	1	0	1	0	0	0	0	0	0
K90-14	2013-10-25	KU1	16	4	Green	Apterous	1	0	0	0	0	0	0		0	0	0	0	0	0	0	0	0	0	0	0	0	0	0	0	0	0	0	0	0	1	0	1	0	0	0	0	0	0
K90-15	2013-10-25	KU1	16	5	Red	Apterous	1	0	0	0	0	1	0		0	0	0	0	1	0	0	0	0	0	0	0	0	0	0	0	0	0	0	0	0	2	0	0	0	0	0	0	0	0
K90-16	2013-10-25	KU1	16	5	Red	Apterous	1	0	0	0	0	1	0		0	0	0	0	1	0	0	0	0	0	0	0	0	0	0	0	0	0	0	0	0	2	0	0	0	0	0	0	0	0
K90-17	2013-10-25	KU1	16	5	Red	Apterous	1	0	0	0	0	1	0		0	0	0	0	1	0	0	0	0	0	0	0	0	0	0	0	0	0	0	0	0	2	0	0	0	0	0	0	0	0
K90-18	2013-10-25	KU1	16	4	Red	Apterous	1	0	0	0	1	1	0		0	0	0	1	1	0	0	0	0	0	0	0	0	0	0	0	0	0	1	0	0	3	0	0	0	0	0	0	0	0
K90-19	2013-10-25	KU1	16	4	Red	Apterous	1	0	0	0	1	1	0		0	0	0	1	1	0	0	0	0	0	0	0	0	0	0	0	0	0	1	0	0	3	0	0	0	0	0	0	0	0
K90-2	2013-10-25	KU1	16	5	Green	Apterous	1	1	0	0	0	1	0		1	0	0	0	1	0	0	0	0	1	0	0	0	0	0	0	0	0	0	0	0	3	0	0	0	0	0	0	0	0
K90-20	2013-10-25	KU1	16	4	Red	Apterous	1	0	0	0	1	0	0		0	0	0	1	0	0	0	0	0	0	0	0	0	0	0	0	0	0	0	0	0	2	0	0	0	0	0	0	0	0
K90-21	2013-10-25	KU1	16	4	Red	Apterous	1	0	0	0	0	0	0		0	0	0	0	0	0	0	0	0	0	0	0	0	0	0	0	0	0	0	0	0	1	0	1	0	0	0	0	0	0
K90-22	2013-10-25	KU1	16	3	Red	Apterous	1	0	0	0	0	0	0		0	0	0	0	0	0	0	0	0	0	0	0	0	0	0	0	0	0	0	0	0	1	0	1	0	0	0	0	0	0
K90-23	2013-10-25	KU1	16	3	Red	Apterous	1	0	0	0	1	0	0		0	0	0	1	0	0	0	0	0	0	0	0	0	0	0	0	0	0	0	0	0	2	0	0	0	0	0	0	0	0
K90-24	2013-10-25	KU1	16	3	Red	Apterous	0	0	0	0	0	0	0		0	0	0	0	0	0	0	0	0	0	0	0	0	0	0	0	0	0	0	0	0	0	1	0	0	0	0	0	0	0
K90-3	2013-10-25	KU1	16	5	Green	Apterous	0	0	0	0	0	0	0		0	0	0	0	0	0	0	0	0	0	0	0	0	0	0	0	0	0	0	0	0	0	1	0	0	0	0	0	0	0
K90-5	2013-10-25	KU1	16	5	Green	Apterous	1	1	0	0	0	1	0		1	0	0	0	1	0	0	0	0	1	0	0	0	0	0	0	0	0	0	0	0	3	0	0	0	0	0	0	0	0
K90-6	2013-10-25	KU1	16	5	Green	Apterous	0	0	1	0	0	1	0		0	0	0	0	0	0	0	0	0	0	0	0	0	1	0	0	0	0	0	0	0	2	0	0	0	0	0	0	0	0
K90-7	2013-10-25	KU1	16	5	Green	Apterous	0	0	0	0	0	1	0		0	0	0	0	0	0	0	0	0	0	0	0	0	0	0	0	0	0	0	0	0	1	0	0	0	0	0	0	1	0
K90-8	2013-10-25	KU1	16	5	Green	Apterous	0	0	0	0	0	1	0		0	0	0	0	0	0	0	0	0	0	0	0	0	0	0	0	0	0	0	0	0	1	0	0	0	0	0	0	1	0
K90-9	2013-10-25	KU1	16	5	Green	Apterous	0	1	0	0	0	1	0		0	0	0	0	0	0	0	0	0	1	0	0	0	0	0	0	0	0	0	0	0	2	0	0	0	0	0	0	0	0
K91-1	2013-10-25	KU2	16	5	Red	Apterous	1	0	0	0	0	0	0		0	0	0	0	0	0	0	0	0	0	0	0	0	0	0	0	0	0	0	0	0	1	0	1	0	0	0	0	0	0
K91-10	2013-10-25	KU2	16	3	Red	Apterous	1	0	0	0	0	1	0		0	0	0	0	1	0	0	0	0	0	0	0	0	0	0	0	0	0	0	0	0	2	0	0	0	0	0	0	0	0
K91-11	2013-10-25	KU2	16	5	Green	Apterous	1	0	0	0	0	0	0		0	0	0	0	0	0	0	0	0	0	0	0	0	0	0	0	0	0	0	0	0	1	0	1	0	0	0	0	0	0
K91-12	2013-10-25	KU2	16	5	Green	Apterous	0	0	0	0	0	1	0		0	0	0	0	0	0	0	0	0	0	0	0	0	0	0	0	0	0	0	0	0	1	0	0	0	0	0	0	1	0
K91-13	2013-10-25	KU2	16	5	Green	Alate	0	1	0	0	0	0	0		0	0	0	0	0	0	0	0	0	0	0	0	0	0	0	0	0	0	0	0	0	1	0	0	1	0	0	0	0	0
K91-14	2013-10-25	KU2	16	3	Green	Apterous	0	0	0	0	0	0	0		0	0	0	0	0	0	0	0	0	0	0	0	0	0	0	0	0	0	0	0	0	0	1	0	0	0	0	0	0	0
K91-15	2013-10-25	KU2	16	3	Green	Apterous	0	0	0	0	0	0	0		0	0	0	0	0	0	0	0	0	0	0	0	0	0	0	0	0	0	0	0	0	0	1	0	0	0	0	0	0	0
K91-16	2013-10-25	KU2	16	3	Green	Apterous	1	0	0	0	0	0	0		0	0	0	0	0	0	0	0	0	0	0	0	0	0	0	0	0	0	0	0	0	1	0	1	0	0	0	0	0	0
K91-17	2013-10-25	KU2	16	3	Green	Apterous	1	0	0	1	0	0	0		0	0	1	0	0	0	0	0	0	0	0	0	0	0	0	0	0	0	0	0	0	2	0	0	0	0	0	0	0	0
K91-18	2013-10-25	KU2	16	3	Green	Apterous	1	0	0	0	0	1	0		0	0	0	0	1	0	0	0	0	0	0	0	0	0	0	0	0	0	0	0	0	2	0	0	0	0	0	0	0	0
K91-19	2013-10-25	KU2	16	3	Green	Apterous	1	0	0	0	0	1	0		0	0	0	0	1	0	0	0	0	0	0	0	0	0	0	0	0	0	0	0	0	2	0	0	0	0	0	0	0	0
K91-2	2013-10-25	KU2	16	5	Red	Apterous	1	1	0	0	0	0	0		1	0	0	0	0	0	0	0	0	0	0	0	0	0	0	0	0	0	0	0	0	2	0	0	0	0	0	0	0	0
K91-20	2013-10-25	KU2	16	3	Green	Apterous	0	1	0	0	0	1	0		0	0	0	0	0	0	0	0	0	1	0	0	0	0	0	0	0	0	0	0	0	2	0	0	0	0	0	0	0	0
K91-21	2013-10-25	KU2	16	3	Green	Apterous	0	0	0	0	0	0	0		0	0	0	0	0	0	0	0	0	0	0	0	0	0	0	0	0	0	0	0	0	0	1	0	0	0	0	0	0	0
K91-22	2013-10-25	KU2	16	3	Green	Apterous	0	0	0	0	0	1	0		0	0	0	0	0	0	0	0	0	0	0	0	0	0	0	0	0	0	0	0	0	1	0	0	0	0	0	0	1	0
K91-23	2013-10-25	KU2	16	3	Green	Apterous	0	0	0	0	0	0	0		0	0	0	0	0	0	0	0	0	0	0	0	0	0	0	0	0	0	0	0	0	0	1	0	0	0	0	0	0	0
K91-24	2013-10-25	KU2	16	3	Green	Apterous	1	0	0	0	0	0	0		0	0	0	0	0	0	0	0	0	0	0	0	0	0	0	0	0	0	0	0	0	1	0	1	0	0	0	0	0	0
K91-3	2013-10-25	KU2	16	5	Red	Apterous	1	0	0	0	0	1	0		0	0	0	0	1	0	0	0	0	0	0	0	0	0	0	0	0	0	0	0	0	2	0	0	0	0	0	0	0	0
K91-4	2013-10-25	KU2	16	5	Red	Apterous	1	0	0	0	1	0	0		0	0	0	1	0	0	0	0	0	0	0	0	0	0	0	0	0	0	0	0	0	2	0	0	0	0	0	0	0	0
K91-5	2013-10-25	KU2	16	3	Red	Apterous	1	0	0	0	0	0	0		0	0	0	0	0	0	0	0	0	0	0	0	0	0	0	0	0	0	0	0	0	1	0	1	0	0	0	0	0	0
K91-6	2013-10-25	KU2	16	3	Red	Apterous	1	0	0	0	0	0	0		0	0	0	0	0	0	0	0	0	0	0	0	0	0	0	0	0	0	0	0	0	1	0	1	0	0	0	0	0	0
K91-7	2013-10-25	KU2	16	3	Red	Apterous	1	0	0	0	0	0	0		0	0	0	0	0	0	0	0	0	0	0	0	0	0	0	0	0	0	0	0	0	1	0	1	0	0	0	0	0	0
K91-8	2013-10-25	KU2	16	3	Red	Apterous	0	0	0	0	0	0	0		0	0	0	0	0	0	0	0	0	0	0	0	0	0	0	0	0	0	0	0	0	0	1	0	0	0	0	0	0	0
K91-9	2013-10-25	KU2	16	3	Red	Apterous	1	0	0	0	0	0	0		0	0	0	0	0	0	0	0	0	0	0	0	0	0	0	0	0	0	0	0	0	1	0	1	0	0	0	0	0	0
K92-1	2013-10-25	KU3	16	5	Red	Alate	0	0	0	0	0	1	0		0	0	0	0	0	0	0	0	0	0	0	0	0	0	0	0	0	0	0	0	0	1	0	0	0	0	0	0	1	0
K92-10	2013-10-25	KU3	16	3	Red	Apterous	1	0	0	0	0	1	0		0	0	0	0	1	0	0	0	0	0	0	0	0	0	0	0	0	0	0	0	0	2	0	0	0	0	0	0	0	0
K92-11	2013-10-25	KU3	16	3	Red	Apterous	1	0	0	0	0	0	0		0	0	0	0	0	0	0	0	0	0	0	0	0	0	0	0	0	0	0	0	0	1	0	1	0	0	0	0	0	0
K92-12	2013-10-25	KU3	16	3	Red	Apterous	0	0	0	0	0	0	0		0	0	0	0	0	0	0	0	0	0	0	0	0	0	0	0	0	0	0	0	0	0	1	0	0	0	0	0	0	0
K92-13	2013-10-25	KU3	16	5	Green	Apterous	0	0	0	0	0	0	0		0	0	0	0	0	0	0	0	0	0	0	0	0	0	0	0	0	0	0	0	0	0	1	0	0	0	0	0	0	0
K92-14	2013-10-25	KU3	16	5	Green	Alate	0	1	0	0	0	1	0		0	0	0	0	0	0	0	0	0	1	0	0	0	0	0	0	0	0	0	0	0	2	0	0	0	0	0	0	0	0
K92-15	2013-10-25	KU3	16	5	Green	Alate	0	0	0	0	0	0	0		0	0	0	0	0	0	0	0	0	0	0	0	0	0	0	0	0	0	0	0	0	0	1	0	0	0	0	0	0	0
K92-16	2013-10-25	KU3	16	4	Green	Apterous	0	0	0	0	0	1	0		0	0	0	0	0	0	0	0	0	0	0	0	0	0	0	0	0	0	0	0	0	1	0	0	0	0	0	0	1	0
K92-17	2013-10-25	KU3	16	4	Green	Apterous	0	0	0	0	0	0	0		0	0	0	0	0	0	0	0	0	0	0	0	0	0	0	0	0	0	0	0	0	0	1	0	0	0	0	0	0	0
K92-18	2013-10-25	KU3	16	3	Green	Apterous	0	0	0	0	0	1	0		0	0	0	0	0	0	0	0	0	0	0	0	0	0	0	0	0	0	0	0	0	1	0	0	0	0	0	0	1	0
K92-19	2013-10-25	KU3	16	3	Green	Apterous	0	0	0	0	0	0	0		0	0	0	0	0	0	0	0	0	0	0	0	0	0	0	0	0	0	0	0	0	0	1	0	0	0	0	0	0	0
K92-2	2013-10-25	KU3	16	5	Red	Alate	0	0	0	0	0	0	0		0	0	0	0	0	0	0	0	0	0	0	0	0	0	0	0	0	0	0	0	0	0	1	0	0	0	0	0	0	0
K92-20	2013-10-25	KU3	16	3	Green	Apterous	1	0	0	0	0	1	0		0	0	0	0	1	0	0	0	0	0	0	0	0	0	0	0	0	0	0	0	0	2	0	0	0	0	0	0	0	0
K92-21	2013-10-25	KU3	16	3	Green	Apterous	1	0	0	0	0	1	0		0	0	0	0	1	0	0	0	0	0	0	0	0	0	0	0	0	0	0	0	0	2	0	0	0	0	0	0	0	0
K92-22	2013-10-25	KU3	16	2	Green	Apterous	1	0	0	0	0	0	0		0	0	0	0	0	0	0	0	0	0	0	0	0	0	0	0	0	0	0	0	0	1	0	1	0	0	0	0	0	0
K92-23	2013-10-25	KU3	16	2	Green	Apterous	0	0	0	0	0	1	0		0	0	0	0	0	0	0	0	0	0	0	0	0	0	0	0	0	0	0	0	0	1	0	0	0	0	0	0	1	0
K92-24	2013-10-25	KU3	16	2	Green	Apterous	0	0	0	0	0	0	0		0	0	0	0	0	0	0	0	0	0	0	0	0	0	0	0	0	0	0	0	0	0	1	0	0	0	0	0	0	0
K92-3	2013-10-25	KU3	16	5	Red	Apterous	0	0	0	0	0	1	0		0	0	0	0	0	0	0	0	0	0	0	0	0	0	0	0	0	0	0	0	0	1	0	0	0	0	0	0	1	0
K92-4	2013-10-25	KU3	16	5	Red	Apterous	1	0	0	0	0	1	0		0	0	0	0	1	0	0	0	0	0	0	0	0	0	0	0	0	0	0	0	0	2	0	0	0	0	0	0	0	0
K92-5	2013-10-25	KU3	16	3	Red	Apterous	0	0	1	0	0	1	0		0	0	0	0	0	0	0	0	0	0	0	0	0	1	0	0	0	0	0	0	0	2	0	0	0	0	0	0	0	0
K92-6	2013-10-25	KU3	16	3	Red	Apterous	0	0	0	0	0	0	0		0	0	0	0	0	0	0	0	0	0	0	0	0	0	0	0	0	0	0	0	0	0	1	0	0	0	0	0	0	0
K92-7	2013-10-25	KU3	16	3	Red	Apterous	0	0	0	0	0	0	0		0	0	0	0	0	0	0	0	0	0	0	0	0	0	0	0	0	0	0	0	0	0	1	0	0	0	0	0	0	0
K92-8	2013-10-25	KU3	16	3	Red	Apterous	0	0	0	0	0	0	0		0	0	0	0	0	0	0	0	0	0	0	0	0	0	0	0	0	0	0	0	0	0	1	0	0	0	0	0	0	0
K92-9	2013-10-25	KU3	16	3	Red	Apterous	0	0	0	0	0	0	0		0	0	0	0	0	0	0	0	0	0	0	0	0	0	0	0	0	0	0	0	0	0	1	0	0	0	0	0	0	0
K93-1	2013-10-25	KU4	16	5	Red	Alate	0	0	0	1	0	0	0		0	0	0	0	0	0	0	0	0	0	0	0	0	0	0	0	0	0	0	0	0	1	0	0	0	0	1	0	0	0
K93-10	2013-10-25	KU4	16	3	Red	Apterous	0	0	0	0	0	1	0		0	0	0	0	0	0	0	0	0	0	0	0	0	0	0	0	0	0	0	0	0	1	0	0	0	0	0	0	1	0
K93-11	2013-10-25	KU4	16	3	Red	Apterous	0	0	0	0	0	0	0		0	0	0	0	0	0	0	0	0	0	0	0	0	0	0	0	0	0	0	0	0	0	1	0	0	0	0	0	0	0
K93-12	2013-10-25	KU4	16	3	Red	Apterous	0	0	0	0	0	1	0		0	0	0	0	0	0	0	0	0	0	0	0	0	0	0	0	0	0	0	0	0	1	0	0	0	0	0	0	1	0
K93-13	2013-10-25	KU4	16	5	Green	Alate	0	0	0	0	0	1	0		0	0	0	0	0	0	0	0	0	0	0	0	0	0	0	0	0	0	0	0	0	1	0	0	0	0	0	0	1	0
K93-14	2013-10-25	KU4	16	5	Green	Alate	0	0	0	0	0	0	0		0	0	0	0	0	0	0	0	0	0	0	0	0	0	0	0	0	0	0	0	0	0	1	0	0	0	0	0	0	0
K93-15	2013-10-25	KU4	16	5	Green	Apterous	0	0	0	0	0	0	0		0	0	0	0	0	0	0	0	0	0	0	0	0	0	0	0	0	0	0	0	0	0	1	0	0	0	0	0	0	0
K93-16	2013-10-25	KU4	16	5	Green	Apterous	0	0	0	0	0	1	0		0	0	0	0	0	0	0	0	0	0	0	0	0	0	0	0	0	0	0	0	0	1	0	0	0	0	0	0	1	0
K93-17	2013-10-25	KU4	16	5	Green	Apterous	1	0	0	0	0	0	0		0	0	0	0	0	0	0	0	0	0	0	0	0	0	0	0	0	0	0	0	0	1	0	1	0	0	0	0	0	0
K93-18	2013-10-25	KU4	16	5	Green	Apterous	1	0	0	0	0	1	0		0	0	0	0	1	0	0	0	0	0	0	0	0	0	0	0	0	0	0	0	0	2	0	0	0	0	0	0	0	0
K93-19	2013-10-25	KU4	16	5	Green	Apterous	0	0	0	0	0	0	0		0	0	0	0	0	0	0	0	0	0	0	0	0	0	0	0	0	0	0	0	0	0	1	0	0	0	0	0	0	0
K93-2	2013-10-25	KU4	16	5	Red	Apterous	0	0	0	0	0	0	0		0	0	0	0	0	0	0	0	0	0	0	0	0	0	0	0	0	0	0	0	0	0	1	0	0	0	0	0	0	0
K93-20	2013-10-25	KU4	16	5	Green	Apterous	0	0	0	0	0	1	1		0	0	0	0	0	0	0	0	0	0	0	0	0	0	0	0	0	0	0	0	1	2	0	0	0	0	0	0	0	0
[truncated: 193 more rows]

## Sheet: Table 2 - env data avgs
Table S2: Environmental variables from our 2012 longitudinal field study, averaged by time and field, used in our statistical analyses
>values in blue highlighting were imputed
				Watchdog probe climate data			Data from sweep-net sampling						Data from live-reared, field-caught aphids
				10-day moving average of temperature	10-day moving average of vapor deficit		Proportion of aphids that were winged	Count of pea aphids	Count of Aphidius ervi	Count of potato leafhoppers	Count of coccinelid beetles		Proportion of collected aphids surviving 8 days	Proportion of collected aphids mummifying from A. ervi	Proportion of collected aphids that died from an apparent Pandora neoaphidis fungal infection
Julian date	Field Abbreviation	Full Field Name	Period	maTaavg	maVapdef		WingAph	AphidDens	Aervi	LeafHop	Coccin		Psurv	Paervi	Ppandora
116	1	KU1	1	13.04	2.0086		0	395.333	34.5	0	1.16667		0.15	0.45	0.125
116	2	KU2	1	12.0217	2.0086		0.00635886	904.25	41	0	1		0	0.5	0
116	3	KU3	1	12.1176	2.0086		0.00306171	707.667	29.5	0	7.33333		0.3	0.425	0.025
116	4	KU4	1	8.84375	2.0086		0.0047619	892.5	68.5	0	0		0.05	0.6	0.1
116	5	KU5	1	11.5058	2.0086		0.0194452	699.4	34.8	0.2	1		0.125	0.625	0.05
116	6	KU6	1	11.5058	2.0086		0.012556	446	33.6	0	0.8		0	0.775	0
130	1	KU1	2	15.6521	1.7083		0.0145631	154.5	26	5.25	0		0.025	0.3	0.175
130	2	KU2	2	14.0521	1.7083		0.0149254	44.6667	25.3333	0	0.333333		0.025	0.05	0.25
130	3	KU3	2	15.5059	2.0086		0.0185874	179.333	19	0	9		0.05	0.05	0.2
130	4	KU4	2	15.1487	1.58774		0.0689655	14.5	0.75	4.5	0.25		0.1	0.15	0.275
130	5	KU5	2	15.386	1.82557		0.00724638	46	6	1.33333	4		0.125	0.05	0.5
130	6	KU6	2	15.1326	1.4113		0.0390625	42.6667	12.6667	6	0.666667		0.025	0.125	0.35
144	1	KU1	3	19.5944	3.65356		0.08	6.25	0.5	0.75	1		0.386364	0.295455	0.295455
144	2	KU2	3	19.4874	3.76232		0.0542041	87.4124	3.12667	21.2033	0.413333		0.2	0.75	0
144	3	KU3	3	20.2712	3.75671		0.0483871	15.5	6.5	7.75	0.333333		0.689655	0.241379	0.0689655
144	4	KU4	3	18.7682	2.9312		0	6.33333	3.33333	36.6667	0.333333		0.695652	0.130435	0
144	5	KU5	3	20.3146	4.04214		0.0909091	4.4	3.8	5.6	0.4		0.310345	0.517241	0.0344828
144	6	KU6	3	18.3434	2.12458		0.0517241	14.5	1.5	55.25	0		0.428571	0.571429	0
158	1	KU1	4	20.0128	1.88638		0	23.75	1.25	51.5	1		0.5	0.266667	0.0666667
158	2	KU2	4	19.4424	1.24411		0	16.25	0.5	69.75	1.75		0.459459	0.27027	0
158	3	KU3	4	19.4909	1.43438		0.00934579	26.75	4.5	59	0.25		0.446809	0.255319	0
158	4	KU4	4	19.3965	2.00152		0	14.6667	1	63.6667	0		0.515152	0.212121	0
158	5	KU5	4	19.0691	0.88778		0	13.25	0.5	58.5	0.25		0.641026	0.282051	0
158	6	KU6	4	19.884	1.04068		0	20.75	0.75	58.25	1.25		0.612245	0.244898	0
171	1	KU1	5	21.1589	1.13918		0.0194175	51.5	2.5	120.25	1.75		0.64	0.2	0
171	2	KU2	5	19.9936	1.42422		0.0105541	75.8	2.6	729.8	1.4		0.552632	0.210526	0
171	3	KU3	5	20.7444	1.56029		0	17.3333	0.666667	194.333	1		0.761905	0.166667	0
171	4	KU4	5	20.3925	1.3797		0.0182927	82	0	167.5	0		0.717391	0.130435	0
171	6	KU6	5	20.5226	0.836573		0.00993377	75.5	0.25	143	1		0.74359	0.0769231	0
184	1	KU1	6	23.9696	4.34774		0	18.25	0.5	158	1.75		1	0	0
184	2	KU2	6	22.7007	3.26357		0	10.3333	0	411.333	5.33333		0.676471	0.117647	0
184	3	KU3	6	25.197	7.68592		0.0384615	17.3333	1.33333	125.667	1.33333		0.793103	0.103448	0
184	5	KU5	6	24.1222	4.96645		0.0145985	45.6667	0	148	1.33333		0.878788	0.0606061	0
184	6	KU6	6	25.0587	5.77555		0.015625	170.667	1.66667	207.667	2.66667		0.929825	0.0350877	0
200	1	KU1	7	28.818	4.5129		0.611511	46.3333	0.333333	49	0		0.806452	0.129032	0
200	2	KU2	7	29.2037	5.01688		0.4947	94.3333	0.333333	67.3333	2		0.648649	0.027027	0
200	3	KU3	7	26.1163	4.85642		0.660714	18.6667	2	146.667	2.66667		0.763139	0.0432521	0
200	4	KU4	7	25.7165	3.81394		0.0892857	504	8	67	1		0.847458	0.0169491	0
200	5	KU5	7	26.2306	4.34872		0.411765	8.5	0.5	98.5	2		0.763139	0.0432521	0
200	6	KU6	7	27.0444	4.2516		0.0639269	219	0	402.667	7.66667		0.75	0	0
214	1	KU1	8	24.3884	2.57125		0.00862069	38.6667	0.333333	12	8		0.432432	0.108108	0.135135
214	2	KU2	8	23.7975	1.53761		0.03125	10.6667	0	5.33333	2		0.463415	0.0731707	0.0243902
214	3	KU3	8	24.5528	1.74316		0.0253165	31.6	0	34.6	3.8		0.540541	0	0.027027
228	1	KU1	9	23.4697	1.46916		0.0294118	11.3333	0	46.3333	1.33333		0.823529	0	0.117647
228	2	KU2	9	23.0781	1.75259		0.0689655	7.25	2	7.75	0.5		0.706305	0.0133333	0.0392157
228	3	KU3	9	24.4847	3.66323		0	1.66667	0	12.3333	0		0.706305	0.0133333	0.0392157
228	4	KU4	9	22.8389	2.47222		0	3	0.666667	6.66667	0		0.706305	0.0133333	0.0392157
228	5	KU5	9	23.604	0.954666		0	0.333333	0	22	2.33333		0.615385	0	0
228	6	KU6	9	24.6059	1.79479		0.0645161	10.3333	0	20	1.66667		0.68	0.04	0
242	1	KU1	10	25.5172	2.39863		0	0.333333	0	3.33333	0		0.647143	0.0104167	0.0219109
242	2	KU2	10	22.0694	1.62052		0.038835	34.3333	0	9.33333	0.666667		0.551724	0	0.0344828
242	3	KU3	10	22.9942	1.82206		0.0676692	26.6	1.2	6.4	2.6		0.625	0.03125	0.03125
242	4	KU4	10	22.728	2.38502		0.00517598	322	0.666667	5	2		0.764706	0	0
242	5	KU5	10	23.1351	3.76691		0.285714	2.33333	2.66667	8.66667	0		0.647143	0.0104167	0.0219109
255	1	KU1	11	20.399	0.553703		0.0861539	108.333	0	10	0.666667		0.771429	0.0285714	0
255	2	KU2	11	20.4194	0.611706		0.021021	111	0	8.66667	2		0.935484	0	0
255	4	KU4	11	20.5364	0.984385		0.0568945	227.479	0.416667	6.25	1.125		0.484848	0	0.484848
255	5	KU5	11	21.6492	0.223324		0.0382775	69.6667	1.66667	5.33333	1.33333		0.888889	0.0555556	0
255	6	KU6	11	21.0426	0.395398		0.0821256	103.5	0	1	0.5		0.911765	0	0.0588235
270	1	KU1	12	18.9361	1.28032		0.0197704	1568	0.666667	2	0.666667		0.461538	0	0.115385
270	2	KU2	12	16.4217	1.89809		0.0643341	295.333	7	0.666667	0.333333		0.325	0.1	0.225
270	3	KU3	12	20.8148	2.65087		0.162791	100.333	3.33333	0.666667	0.333333		0.277778	0.111111	0.0277778
270	4	KU4	12	16.1455	2.07932		0.0887097	124	3	1	0.666667		0.484848	0.030303	0.151515
270	5	KU5	12	16.3647	1.01124		0.0232877	243.333	2	2.66667	2		0.375	0	0.270833
270	6	KU6	12	15.5351	0.536876		0.0330578	121	0	1.33333	1.66667		0.489362	0.0425532	0.170213
284	1	KU1	13	13.7017	0.40233		0.0243112	411.333	3.66667	0.666667	1.33333		0.0952381	0	0.738095
284	2	KU2	13	13.8965	0.294194		0.0286832	255.667	6.33333	0.666667	1.66667		0.0645161	0.0645161	0.709677
284	3	KU3	13	14.0412	0.463431		0.00984529	177.75	1.5	0.5	2.5		0.0243902	0	0.536585
284	4	KU4	13	13.794	0.300341		0.0257164	453.667	2.66667	0.333333	0		0.0714286	0	0.595238
284	5	KU5	13	14.2429	0.390775		0.0487805	95.6667	1	1.66667	2.66667		0.133333	0	0.433333
284	6	KU6	13	13.8268	0.0241386		0.0196078	81.6	0.8	3	1		0.125	0.03125	0.25
299	1	KU1	14	12.2502	0.609614		0.0454546	29.3333	7	1.66667	1.66667		0.275862	0	0.724138
299	2	KU2	14	12.1582	0.29651		0.145833	24	6	0.5	0		0.107143	0	0.642857
299	3	KU3	14	12.3602	0.65292		0.0666667	7.5	3.75	0.25	2		0.125	0.0416667	0.625
299	4	KU4	14	12.0395	0.315751		0.204082	24.5	2	1.5	0.5		0.294118	0	0.647059
299	5	KU5	14	12.9091	0.940712		0.0555556	24	1	1.33333	0		0.200531	0.0104167	0.659763

## Sheet: Table S3 - PCR screening protoc
Table S3: Cycling conditions, primer sequences, and cocktail recipes for PCRs used for diagnostic symbiont screening, Buchnera ibpA gene promoter genotyping, and aphid microsatellite genotyping
Diagnostic PCR protocols—cycling conditions for primary diagnostic screens
Buchnera aphidicola: 94◦C for 7 minutes; 30 cycles of 94◦C for 30 s., 62◦C for 1 min., 72◦C for 1.5 min; and 72◦C for 7 min.
Hamiltonella, Regiella, and Fukatsuia (X-type): 94◦C for 2 minutes; 9 cycles of 94◦C for 1 min., 65◦C for 1 min. decreasing by 1◦C each cycle, 72◦C for 2 min.; 25 cycles of 94◦C for 1 min., 55◦C for 1 min. and 72◦C for 2 min.; and 72◦C for 6 min.
Serratia: 95◦C for 5 minutes; 40 cycles of 95◦C for 30s, 66◦C for 30s, 72◦C for 30s; and 72◦C for 2 min.
Rickettsiella: 95◦C for 4 minutes; 40 cycles of 95◦C for 30s, 58◦C for 30s, 72◦C for 30s; and 72◦C for 2 min.
Spiroplasma: 95◦C for 1 minute; 35 cycles of 95◦C for 1 min., 56◦C for 15s, 72◦C for 20s; and 72◦C for 2 min.
Rickettsia: 95◦C for 2 minutes; 12 cycles of 95◦C for 15s, 56◦C for 15s, decreasing by 1◦C each cycle, 72◦C for 30s; 35 cycles of 95◦C for 15s, 46◦C for 15s, 72◦C for 30s; and 72◦C for 1 min.
Primers used for primary diagnostic screens
Primer names & sequences (5' - 3')	Product length	Targeted endosymbiont	Source
BuchneraF: CTGTTGCCAGCCAGCGGTTCGG	388 bp	Buchnera aphidicola	Leonardo and Muiru 2003
EcoliR: CCCCTACGGTAACCTTGTTACG
10F: AGTTTGATCATGGCTCAGATTG	471 bp	Hamiltonella defensa	Sandström et al. 2001; Ferrari et al. 2012
T419R:AAATGGTATTSGCATTTATCG
10F: AGTTTGATCATGGCTCAGATTG	1283 bp	Regiella insecticola
Reg1292R: ACTTTATGAGGTTCGCTTACG
10F: AGTTTGATCATGGCTCAGATTG	488 bp	Serratia symbiotica
R443R: CTTCTGCGAGTAACGTCAATG
10F: AGTTTGATCATGGCTCAGATTG	468 bp	Fukatsuia symbiotica (X-type)
X420R: GCAACACTCTTTGCATTGCT
RCL16S211F: GGGCCTTGCGCTCTAGGT	281 bp	Rickettsiella viridis	Tsuchida et al. 2010
RCL16S470R: TGGGTACCGTCACAGTAATCGA
9Fa: GAGTTTGATCITIGCTCAG	1457 bp	Spiroplasma sp.	Russell et al. 2009; McLean et al. 2011
Spi16SR: ATCATCAACCCTGCCTTTGG
16SA1F: AGAGTTTGATCMTGGCTCAG	1229 bp	Rickettsia sp.	Fukatsu and Nikoh 1998; Sakurai et al. 2005
RickR2: TCCACGTCACCGTCTTGC
The above protocols were published previously in the below two references:
Rock DI, Smith AH, Joffe J, Albertus A, Wong N, O’Connor M, Oliver K, Russell JA (2018) Context-dependent vertical transmission shapes strong symbiont community structure in the pea aphid, Acyrthosiphon pisum. Molecular Ecology 27: 2039-2056.
Smith AH, Łukasik P, O’Connor MP, Lee A, Mayo G, Drott MT, Doll S, Tuttle R, DiSciullo RA, Messina A, Oliver KM, Russell JA (2015) Patterns, causes, and consequences of defensive microbiome dynamics across multiple scales. Molecular Ecology 24: 1135-1149.
Protocols and results from Buchnera strain genotyping
gene	primers - Sequence (5'-3')	primer source	PCR cycling conditions	PCR cocktail recipe
ibpA	ibpA (NM2) F: CAAATCAAACTATGTAGAAGAACATTTAGATC	Burke et al.(2010)		12.5 μl of the reaction mix MyTaqTM red mix (Bioline Reagents Ltd., London, UK), 1 μl of the forward and reverse primers, 9.5 μl of ddH2O, and 1 μl DNA
	ibpA (NM2) R: CTAATTTCAATAGACCTAAAGATAACTCTGC
Microsatellite Protocols
Primer Pair/Locus Name	Dye	Primer Sequence	Repeat	Size	Source
S23	6-FAM	GGTCCGAGAGCATTCATTAGG	(GA)14	122-156	Wilson et al., Mol Ecol Res 4:104-109 (2004)
		CGTCGTTGTCATTGTCGTCG
S24	VIC	CCCGACCCCGTCCATTCAAA	(CA)20	167-218
		CCTCCACCACTACTTTCACTCC
ApH10M	6-FAM	ACGACGGGTGCAAGTATATT	(CA)16	186-208	Caillaud et al., Mol Ecol Res 4:446-448 (2004)
		CAACATGACCTCGCTTCAGA
ApF08M	NED	TAATCCGTCGTAATTGCGTT	(TG)2(TA)(TG)8	163-174
		TAAGCCCTCACTCACCCCTC
S30	PET	CCGACATAAAACACACCCAG	(CA)13	163-175	Wilson et al., Mol Ecol Res 4:104-109 (2004)
		GTTTTGCCTCCTCCCCTC
Aph08M	NED	GCGCACAGTGCGTATACATT	(CA)10	250-284	Caillaud et al., Mol Ecol Res 4:446-448 (2004)
		TATTACAACGCACGTCATCG
Cocktail for Microsatellite PCRs
MyTaq Red	6.25 μl
MgCl2	0.4 μl
H2O	0.75 μl
DNA	1 μl
Primers (at 20μM)
S23F&R	0.1 μl
S24F&R	0.1 μl
ApH10MF&R	0.1 μl
ApF08MF&R	0.2 μl
S30F&R	0.3 μl
Aph08MF&R	0.3 μl
Microsatellite PCR Cycling Conditions: From Wilson et al., Mol Ecol Res 4:104-109 (2004)
Step 1	94◦C for 2 min
Step 2	62◦C for 30s
Step 3	72◦C for 45s
Step 4	94◦C for 15s
Step 5	61◦C for 30s
Step 6	72◦C for 45s
Step 7	94◦C for 15s
Step 8	59◦C for 30s
Step 9	72◦C for 45s
Step 10	94◦C for 15s
Step 11	57◦C for 30s
Step 12	72◦C for 45s
Step 13	94◦C for 15s
Step 14	55◦C for 30s, 72◦C for 45s, 94◦C for 15s	x30
Step 15	72◦C for 2 min
Microsatellite chromatograms were analyzed using the program ‘GeneMarker.’ In the analysis the following peaks were expected for each locus, and peaks outside of those ranges were rejected:
Blue (S23): 125-150
Blue (ApH10M): 186-208
Green (S24): 160-190
Black (APF08M): 163-176
Black (Aph08M): 245-290
Red (S30): 150-180

## Sheet: Table S4 - 2012TimeEnvironStats
Table S4: Statistical analyses on symbiont data from our 2012 longitudinal field study - symbionts vs. time; symbionts vs. environmental variables
>R-commands & models (gray), and outputs (blue, orange, pink)
>comments/annotations are in black font in the columns to the right of the statistics
>Simultaneous: x-variables related to y-variables (symbiont frequencies) at the same time; Lagged: x-variables from previous sampling time (2 weeks prior, or t-2) related to y-variables at present time (t)
		Fukatsuia (X-type) across our 2012 longitudinal field study - variation over time			Rickettsiella across our 2012 longitudinal field study - variation over time			Rickettsiella across our 2012 longitudinal field study - environmental correlates (Simultaneous)			Rickettsiella across our 2012 longitudinal field study - environmental correlates (Simultaneous + Lagged)			Spiroplasma across our 2012 longitudinal field study - variation over time			Spiroplasma across our 2012 longitudinal field study - environmental correlates (Simultaneous)			Spiroplasma across our 2012 longitudinal field study - environmental correlates (Simultaneous + Lagged)			Regiella across our 2012 longitudinal field study - variation over time			Regiella across our 2012 longitudinal field study - environmental correlates (Simultaneous)			Regiella across our 2012 longitudinal field study - environmental correlates (Simultaneous + Lagged)			Serratia across our 2012 longitudinal field study - variation over time			Serratia across our 2012 longitudinal field study - environmental correlates (Simultaneous)			Serratia across our 2012 longitudinal field study - environmental correlates (Simultaneous + Lagged)			Rickettsia across our 2012 longitudinal field study - variation over time			Rickettsia across our 2012 longitudinal field study - environmental correlates (Simultaneous)			Rickettsia across our 2012 longitudinal field study - environmental correlates (Simultaneous + Lagged)
																				not run because all a priori variables were significant under the simultaneous model
		Period Analysis			Period Analysis			FullRklaMod = glmer(cbind(nRklapos,nRklaneg)~stdmaTA+stdmaVap+lgWingAph+lgAphDen+lgAervi+lgLeafHop+lgCoccin+Psurv+Paervi+Ppandora + (1|fField), family = binomial, data = DataforGlm)			RklaAPLag = glmer(cbind(nRklapos,nRklaneg)~stdmaVap + lgAphDen + Psurv + lag1Ppandora + (1|fField), family = binomial, data = LagGLM)			Period Analysis									> RegPeriod <- glmer(cbind(nRegpos,nRegneg)~fPeriod + (1|fField), family=binomial, data=DataforGlm)			> library(lme4)			> library(lme4)			> SerPeriod <- glmer(cbind(nSerpos,nSerneg)~fPeriod + (1|fField), family=binomial, data=DataforGlm)			> OriSerMod = glmer(cbind(nSerpos,nSerneg)~stdmaTA+stdmaVap+lgWingAph+lgAphDen+lgAervi+lgLeafHop+lgCoccin+Psurv+Paervi+Ppandora+ (1|fField), family = binomial, data = DataforGlm)			> library(lme4)			> RickPeriod <- glmer(cbind(nRickpos,nRickneg)~fPeriod + (1|fField), family=binomial, data=DataforGlm)			> OriRickMod = glmer(cbind(nRickpos,nRickneg)~stdmaTA+stdmaVap+lgWingAph+lgAphDen+lgAervi+lgLeafHop+lgCoccin+Psurv+Paervi+Ppandora+ (1|fField), family = binomial, data = DataforGlm)			> library(lme4)
		XPeriod <- glmer(cbind(nXpos,nXneg)~fPeriod + (1|fField), family=binomial, data=DataforGlm)	Period is a fixed effect, field site is a random effect		RklaPeriod <- glmer(cbind(nRklapos, nRklaneg)~fPeriod + (1|fField), family = binomial, data = DataforGlm)			summary(FullRklaMod)			summary(RklaAPLag)			SpiroPeriod <- glmer(cbind(nSpipos, nSpineg)~fPeriod + (1|fField), family = binomial, data = DataforGlm)			FullSpiroMod = glmer(cbind(nSpipos,nSpineg)~stdmaTA+stdmaVap+lgWingAph+lgAphDen+lgAervi+lgLeafHop+lgCoccin+Psurv+Paervi+Ppandora + (1|fField), family = binomial, data = DataforGlm)						> summary(RegPeriod)			> ORegMod = glmer(cbind(nRegpos,nRegneg)~stdmaTA+stdmaVap+lgWingAph+lgAphDen+lgAervi+lgLeafHop+lgCoccin+Psurv+Paervi+Ppandora + (1|fField), family = binomial, data = DataforGlm)			> DataforGlm <- read.table("Reg-Ser-Rick for glm original&lag1 v2.csv",header=T,sep = ",")			> summary(SerPeriod)			> summary(OriSerMod)			> DataforGlm <- read.table("Reg-Ser-Rick for glm original&lag1 v2.csv",header=T,sep = ",")			> summary(RickPeriod)			> summary(OriRickMod)			> DataforGlm <- read.table("Reg-Ser-Rick for glm original&lag1 v2.csv",header=T,sep = ",")
		summary(XPeriod)			summary(RklaPeriod)			Generalized linear mixed model fit by maximum likelihood (Laplace Approximation) ['glmerMod']			Generalized linear mixed model fit by maximum likelihood (Laplace Approximation) ['glmerMod']			summary(SpiroPeriod)			summary(FullSpiroMod)						Generalized linear mixed model fit by maximum likelihood (Laplace Approximation) ['glmerMod']			> summary(ORegMod)			> str(DataforGlm)			Generalized linear mixed model fit by maximum likelihood (Laplace Approximation) ['glmerMod']			Generalized linear mixed model fit by maximum likelihood (Laplace Approximation) ['glmerMod']			> str(DataforGlm)			Generalized linear mixed model fit by maximum likelihood (Laplace Approximation) ['glmerMod']			Generalized linear mixed model fit by maximum likelihood (Laplace Approximation) ['glmerMod']			> str(DataforGlm)
		Generalized linear mixed model fit by maximum likelihood (Laplace Approximation) ['glmerMod']			Generalized linear mixed model fit by maximum likelihood (Laplace Approximation) ['glmerMod']			Family: binomial ( logit )			Family: binomial ( logit )			Generalized linear mixed model fit by maximum likelihood (Laplace Approximation) ['glmerMod']			Generalized linear mixed model fit by maximum likelihood (Laplace Approximation) ['glmerMod']						Family: binomial ( logit )			Generalized linear mixed model fit by maximum likelihood (Laplace Approximation) [			data.frame':			Family: binomial ( logit )			Family: binomial ( logit )			data.frame':	63 obs. of 48 variables:		Family: binomial ( logit )			Family: binomial ( logit )			data.frame':	63 obs. of 48 variables:
		Family: binomial ( logit )			Family: binomial ( logit )			Formula: cbind(nRklapos, nRklaneg) ~ stdmaTA + stdmaVap + lgWingAph + lgAphDen + lgAervi + lgLeafHop + lgCoccin + Psurv + Paervi +			Formula: cbind(nRklapos, nRklaneg) ~ stdmaVap + lgAphDen + Psurv + lag1Ppandora + (1 | fField)			Family: binomial ( logit )			Family: binomial ( logit )						Formula: cbind(nRegpos, nRegneg) ~ fPeriod + (1 | fField)			glmerMod]			$ ï..Julian.date: int 130 144 158 171 184 200 214 228 242 255 ...			Formula: cbind(nSerpos, nSerneg) ~ fPeriod + (1 | fField)			Formula: cbind(nSerpos, nSerneg) ~ stdmaTA + stdmaVap + lgWingAph + lgAphDen +			$ ï..Julian.date: int 130 144 158 171 184 200 214 228 242 255 ...			Formula: cbind(nRickpos, nRickneg) ~ fPeriod + (1 | fField)			Formula: cbind(nRickpos, nRickneg) ~ stdmaTA + stdmaVap + lgWingAph +			$ ï..Julian.date: int 130 144 158 171 184 200 214 228 242 255 ...
		Formula: cbind(nXpos, nXneg) ~ fPeriod + (1 | fField)			Formula: cbind(nRklapos, nRklaneg) ~ fPeriod + (1 | fField)			Ppandora + (1 | fField)			Data: LagGLM			Formula: cbind(nSpipos, nSpineg) ~ fPeriod + (1 | fField)			Formula: cbind(nSpipos, nSpineg) ~ stdmaTA + stdmaVap + lgWingAph + lgAphDen + lgAervi + lgLeafHop + lgCoccin + Psurv + Paervi + Ppandora +						Data: DataforGlm			Family: binomial ( logit )			$ Field : int 1 1 1 1 1 1 1 1 1 1 ...			Data: DataforGlm			lgAervi + lgLeafHop + lgCoccin + Psurv + Paervi + Ppandora + (1 | fField)			$ Field : int 1 1 1 1 1 1 1 1 1 1 ...			Data: DataforGlm			lgAphDen + lgAervi + lgLeafHop + lgCoccin + Psurv + Paervi + Ppandora + (1 | fField)			$ Field : int 1 1 1 1 1 1 1 1 1 1 ...
		Data: DataforGlm			Data: DataforGlm			Data: DataforGlm						Data: DataforGlm			(1 | fField)									Formula: cbind(nRegpos, nRegneg) ~ stdmaTA + stdmaVap + lgWingAph + lgAphDen +			$ Period : int 2 3 4 5 6 7 8 9 10 11 ...						Data: DataforGlm			$ Period : int 2 3 4 5 6 7 8 9 10 11 ...						Data: DataforGlm			$ Period : int 2 3 4 5 6 7 8 9 10 11 ...
											AIC BIC logLik deviance df.resid						Data: DataforGlm						AIC BIC logLik deviance df.resid			lgAervi + lgLeafHop + lgCoccin + Psurv + Paervi + Ppandora + (1 | fField)			$ maTaavg : num 15.7 19.6 20 21.2 24 ...			AIC BIC logLik deviance df.resid						$ maTaavg : num 15.7 19.6 20 21.2 24 ...			AIC BIC logLik deviance df.resid						$ maTaavg : num 15.7 19.6 20 21.2 24 ...
		AIC BIC logLik deviance df.resid			AIC BIC logLik deviance df.resid			AIC BIC logLik deviance df.resid			367.1 380.0 -177.6 355.1 57			AIC BIC logLik deviance df.resid									328.9 363.8 -149.4 298.9 61			Data: DataforGlm			$ stdmaTA : num -0.7519 0.0638 0.1504 0.3875 0.9691 ...			263.7 298.6 -116.8 233.7 61			AIC BIC logLik deviance df.resid			$ stdmaTA : num -0.7519 0.0638 0.1504 0.3875 0.9691 ...			352.2 387.2 -161.1 322.2 61			AIC BIC logLik deviance df.resid			$ stdmaTA : num -0.7519 0.0638 0.1504 0.3875 0.9691 ...
		231.6 266.6 -100.8 201.6 61			351.1 386.0 -160.5 321.1 61			463.3 491.3 -219.7 439.3 64						244.5 279.4 -107.2 214.5 61			AIC BIC logLik deviance df.resid												$ maVapdef : num 1.71 3.65 1.89 1.14 4.35 ...						263.8 291.8 -119.9 239.8 64			$ maVapdef : num 1.71 3.65 1.89 1.14 4.35 ...						365.2 393.2 -170.6 341.2 64			$ maVapdef : num 1.71 3.65 1.89 1.14 4.35 ...
											Scaled residuals:						226.0 253.9 -101.0 202.0 64						Scaled residuals:			AIC BIC logLik deviance df.resid			$ stdmaVap : num -0.237 1.048 -0.12 -0.613 1.507 ...			Scaled residuals:						$ stdmaVap : num -0.237 1.048 -0.12 -0.613 1.507 ...			Scaled residuals:						$ stdmaVap : num -0.237 1.048 -0.12 -0.613 1.507 ...
		Scaled residuals:			Scaled residuals:			Scaled residuals:			Min 1Q Median 3Q Max			Scaled residuals:									Min 1Q Median 3Q Max			338.5 366.4 -157.2 314.5 64			$ WingAph : num 0.0146 0.08 0 0.0194 0 ...			Min 1Q Median 3Q Max			Scaled residuals:			$ WingAph : num 0.0146 0.08 0 0.0194 0 ...			Min 1Q Median 3Q Max			Scaled residuals:			$ WingAph : num 0.0146 0.08 0 0.0194 0 ...
		Min 1Q Median 3Q Max			Min 1Q Median 3Q Max			Min 1Q Median 3Q Max			-2.5188 -1.4474 -0.4313 1.3171 3.6449			Min 1Q Median 3Q Max			Scaled residuals:						-1.97642 -0.75153 -0.05589 0.55642 2.34776						$ lgWingAph : num -1.81 -1.09 -3 -1.69 -3 ...			-1.9958 -0.7862 -0.3993 0.8730 2.5814			Min 1Q Median 3Q Max			$ lgWingAph : num -1.81 -1.09 -3 -1.69 -3 ...			-1.98834 -0.89647 0.00099 0.61806 2.76513			Min 1Q Median 3Q Max			$ lgWingAph : num -1.81 -1.09 -3 -1.69 -3 ...
		-1.7498 -0.7837 -0.1515 0.5039 3.3381			-2.7448 -0.8713 -0.1595 0.8892 2.4668			-2.8000 -1.4195 -0.4294 1.2250 4.9595						-1.6077 -0.9137 -0.4937 0.5003 3.7333			Min 1Q Median 3Q Max									Scaled residuals:			$ AphidDens : num 154.5 6.25 23.75 51.5 18.25 ...						-2.1651 -0.8943 -0.4383 0.7933 3.0251			$ AphidDens : num 154.5 6.25 23.75 51.5 18.25 ...						-2.1174 -0.8453 -0.1263 0.9755 2.8390			$ AphidDens : num 154.5 6.25 23.75 51.5 18.25 ...
											Random effects:						-1.5168 -0.8602 -0.4294 0.8428 6.3107						Random effects:			Min 1Q Median 3Q Max			$ lgAphDen : num 2.189 0.796 1.376 1.712 1.261 ...			Random effects:						$ lgAphDen : num 2.189 0.796 1.376 1.712 1.261 ...			Random effects:						$ lgAphDen : num 2.189 0.796 1.376 1.712 1.261 ...
		Random effects:			Random effects:			Random effects:			Groups Name Variance Std.Dev.			Random effects:									Groups Name Variance Std.Dev.			-2.8745 -0.8283 -0.1183 0.5271 4.0513			$ Aervi : num 26 0.5 1.25 2.5 0.5 ...			Groups Name Variance Std.Dev.			Random effects:			$ Aervi : num 26 0.5 1.25 2.5 0.5 ...			Groups Name Variance Std.Dev.			Random effects:			$ Aervi : num 26 0.5 1.25 2.5 0.5 ...
		Groups Name Variance Std.Dev.			Groups Name Variance Std.Dev.			Groups Name Variance Std.Dev.			fField (Intercept) 0.1493 0.3864			Groups Name Variance Std.Dev.			Random effects:						fField (Intercept) 0 0						$ lgAervi : num 1.417 -0.222 0.13 0.415 -0.222 ...			fField (Intercept) 0.09648 0.3106			Groups Name Variance Std.Dev.			$ lgAervi : num 1.417 -0.222 0.13 0.415 -0.222 ...			fField (Intercept) 0.00279 0.05282			Groups Name Variance Std.Dev.			$ lgAervi : num 1.417 -0.222 0.13 0.415 -0.222 ...
		fField (Intercept) 0.3096 0.5564			fField (Intercept) 0.09573 0.3094			fField (Intercept) 0.0214 0.1463			Number of obs: 63, groups: fField, 6			fField (Intercept) 0 0			Groups Name Variance Std.Dev.						Number of obs: 76, groups: fField, 6			Random effects:			$ LeafHop : num 5.25 0.75 51.5 120.25 158 ...			Number of obs: 76, groups: fField, 6			fField (Intercept) 0 0			$ LeafHop : num 5.25 0.75 51.5 120.25 158 ...			Number of obs: 76, groups: fField, 6			fField (Intercept) 0.002281 0.04776			$ LeafHop : num 5.25 0.75 51.5 120.25 158 ...
		Number of obs: 76, groups: fField, 6			Number of obs: 76, groups: fField, 6			Number of obs: 76, groups: fField, 6						Number of obs: 76, groups: fField, 6			fField (Intercept) 0 0									Groups Name Variance Std.Dev.			$ lgLeafHop : num 0.7284 -0.0706 1.7126 2.0804 2.1989 ...						Number of obs: 76, groups: fField, 6			$ lgLeafHop : num 0.7284 -0.0706 1.7126 2.0804 2.1989 ...						Number of obs: 76, groups: fField, 6			$ lgLeafHop : num 0.7284 -0.0706 1.7126 2.0804 2.1989 ...
											Fixed effects:						Number of obs: 76, groups: fField, 6						Fixed effects:			fField (Intercept) 3.007e-18 1.734e-09			$ Coccin : num 0 1 1 1.75 1.75 ...			Fixed effects:						$ Coccin : num 0 1 1 1.75 1.75 ...			Fixed effects:						$ Coccin : num 0 1 1 1.75 1.75 ...
		Fixed effects:			Fixed effects:			Fixed effects:			Estimate Std. Error z value Pr(>|z|)			Fixed effects:									Estimate Std. Error z value Pr(>|z|)			Number of obs: 76, groups: fField, 6			$ lgCoccin : num -1 0.0414 0.0414 0.2672 0.2672 ...			Estimate Std. Error z value Pr(>|z|)			Fixed effects:			$ lgCoccin : num -1 0.0414 0.0414 0.2672 0.2672 ...			Estimate Std. Error z value Pr(>|z|)			Fixed effects:			$ lgCoccin : num -1 0.0414 0.0414 0.2672 0.2672 ...
		Estimate Std. Error z value Pr(>|z|)			Estimate Std. Error z value Pr(>|z|)			Estimate Std. Error z value Pr(>|z|)			(Intercept) -2.42286 0.38892 -6.230 4.67e-10 ***			Estimate Std. Error z value Pr(>|z|)			Fixed effects:						(Intercept) -2.4908 0.2781 -8.956 < 2e-16 ***						$ Psurv : num 0.025 0.386 0.5 0.64 1 ...			(Intercept) -2.0997 0.2678 -7.841 4.47e-15 ***	Period might be significant		Estimate Std. Error z value Pr(>|z|)			$ Psurv : num 0.025 0.386 0.5 0.64 1 ...			(Intercept) -2.2805 0.2558 -8.915 < 2e-16 ***			Estimate Std. Error z value Pr(>|z|)			$ Psurv : num 0.025 0.386 0.5 0.64 1 ...
		(Intercept) -3.13352 0.41697 -7.515 5.69e-14 ***			(Intercept) -1.34120 0.22319 -6.009 1.86e-09 ***			(Intercept) -3.09064 0.54584 -5.662 1.5e-08 ***			stdmaVap -0.39845 0.09372 -4.251 2.12e-05 ***	Vapor deficit remains highly significant when lagged Pandora data added		(Intercept) -2.2788 0.2546 -8.949 <2e-16 ***	Period might be significant		Estimate Std. Error z value Pr(>|z|)						fPeriod2 0.3677 0.3966 0.927 0.353872			Fixed effects:			$ Paervi : num 0.3 0.295 0.267 0.2 0 ...			fPeriod2 -1.1569 0.5113 -2.263 0.02367 *			(Intercept) -3.08855 0.62874 -4.912 9e-07 ***			$ Paervi : num 0.3 0.295 0.267 0.2 0 ...			fPeriod2 0.2333 0.3744 0.623 0.533188			(Intercept) -1.20171 0.42866 -2.803 0.00506 **			$ Paervi : num 0.3 0.295 0.267 0.2 0 ...
		fPeriod2 -0.04565 0.54483 -0.084 0.933			fPeriod2 -0.34055 0.30197 -1.128 0.259426			stdmaTA -0.20018 0.19888 -1.007 0.31416			lgAphDen 0.13899 0.14134 0.983 0.325413	Aphid density no longer significant in model with lagged data - note that the dataset is inherently smaller		fPeriod2 -0.5956 0.4645 -1.282 0.1998			(Intercept) -4.86225 0.81353 -5.977 2.28e-09 ***						fPeriod3 0.5200 0.3800 1.369 0.171102			Estimate Std. Error z value Pr(>|z|)			$ Ppandora : num 0.175 0.2955 0.0667 0 0 ...			fPeriod3 -0.8764 0.4519 -1.939 0.05245 .			stdmaTA 0.59958 0.29341 2.044 0.04100 *			$ Ppandora : num 0.175 0.2955 0.0667 0 0 ...			fPeriod3 0.5531 0.3479 1.590 0.111810			stdmaTA 0.19987 0.18742 1.066 0.28624			$ Ppandora : num 0.175 0.2955 0.0667 0 0 ...
		fPeriod3 0.33544 0.49013 0.684 0.494			fPeriod3 -1.14399 0.36462 -3.137 0.001704 **			stdmaVap -0.30016 0.11182 -2.684 0.00727 **			Psurv 1.10139 0.32864 3.351 0.000804 ***	Survival remains significant when lagged Pandora data added		fPeriod3 -1.9481 0.7564 -2.575 0.0100 *			stdmaTA -0.09627 0.33131 -0.291 0.771379						fPeriod4 0.9327 0.3575 2.609 0.009076 **			(Intercept) -1.98739 0.45388 -4.379 1.19e-05 ***			$ total.n : int 20 23 23 24 24 24 24 24 10 23 ...			fPeriod4 -1.4489 0.5571 -2.601 0.00930 **			stdmaVap -0.06812 0.21029 -0.324 0.74601			$ total.n : int 20 23 23 24 24 24 24 24 10 23 ...			fPeriod4 0.4450 0.3549 1.254 0.209853			stdmaVap -0.07325 0.10704 -0.684 0.49379			$ total.n : int 20 23 23 24 24 24 24 24 10 23 ...
		fPeriod4 0.35428 0.49040 0.722 0.470			fPeriod4 -1.78672 0.45633 -3.915 9.03e-05 ***			lgWingAph 0.07686 0.11756 0.654 0.51324			lag1Ppandora -0.66444 0.49442 -1.344 0.178986	Lagged Pandora data is not significant		fPeriod4 -1.5279 0.6369 -2.399 0.0164 *			stdmaVap 0.08161 0.20739 0.393 0.693961						fPeriod5 0.7661 0.3779 2.027 0.042634 *			stdmaTA -0.06999 0.20103 -0.348 0.727709			$ nRegpos : int 3 1 1 2 0 5 5 3 0 5 ...			fPeriod5 -0.9380 0.4794 -1.956 0.05041 .			lgWingAph -0.24746 0.16177 -1.530 0.12609			$ nRegpos : int 3 1 1 2 0 5 5 3 0 5 ...			fPeriod5 0.4198 0.3707 1.133 0.257399			lgWingAph 0.04531 0.10529 0.430 0.66691			$ nRegpos : int 3 1 1 2 0 5 5 3 0 5 ...
		fPeriod5 0.74839 0.47247 1.584 0.113			fPeriod5 1.06889 0.26313 4.062 4.86e-05 ***			lgAphDen 0.39602 0.13705 2.890 0.00386 **			---			fPeriod5 -1.0799 0.5688 -1.898 0.0576 .			lgWingAph -0.04977 0.21805 -0.228 0.819470						fPeriod6 0.1206 0.4321 0.279 0.780160			stdmaVap -0.15070 0.11071 -1.361 0.173458			$ nRegneg : int 17 22 22 22 24 19 19 21 10 18 ...			fPeriod6 -1.9237 0.7492 -2.568 0.01024 *			lgAphDen 0.23792 0.16031 1.484 0.13778			$ nRegneg : int 17 22 22 22 24 19 19 21 10 18 ...			fPeriod6 0.8161 0.3478 2.347 0.018932 *			lgAphDen 0.01980 0.10858 0.182 0.85527			$ nRegneg : int 17 22 22 22 24 19 19 21 10 18 ...
		fPeriod6 0.18174 0.52378 0.347 0.729			fPeriod6 0.04465 0.29559 0.151 0.879934			lgAervi -0.02237 0.14731 -0.152 0.87932			Signif. codes: 0 ‘***’ 0.001 ‘**’ 0.01 ‘*’ 0.05 ‘.’ 0.1 ‘ ’ 1			fPeriod6 -1.0623 0.5689 -1.867 0.0619 .			lgAphDen 0.83219 0.21810 3.816 0.000136 ***						fPeriod7 1.2652 0.3432 3.687 0.000227 ***			lgWingAph 0.22774 0.11626 1.959 0.050126 .			$ nSerpos : int 1 1 3 0 0 0 2 0 2 0 ...			fPeriod7 -1.7705 0.6266 -2.825 0.00472 **			lgAervi -0.19114 0.24752 -0.772 0.43997			$ nSerpos : int 1 1 3 0 0 0 2 0 2 0 ...			fPeriod7 0.4198 0.3546 1.184 0.236464			lgAervi -0.19401 0.14548 -1.334 0.18234			$ nSerpos : int 1 1 3 0 0 0 2 0 2 0 ...
		fPeriod7 -0.11417 0.54396 -0.210 0.834			fPeriod7 -1.06566 0.35401 -3.010 0.002610 **			lgLeafHop 0.02697 0.10858 0.248 0.80381						fPeriod7 -0.5321 0.4443 -1.198 0.2310			lgAervi -0.54528 0.27164 -2.007 0.044712 *						fPeriod8 0.9783 0.4138 2.364 0.018071 *			lgAphDen 0.15355 0.11975 1.282 0.199770			$ nSerneg : int 19 22 20 24 24 24 22 24 8 23 ...			fPeriod8 0.3048 0.4060 0.751 0.45283			lgLeafHop -0.54013 0.17665 -3.058 0.00223 **			$ nSerneg : int 19 22 20 24 24 24 22 24 8 23 ...			fPeriod8 0.6718 0.4066 1.652 0.098444 .			lgLeafHop -0.20189 0.10950 -1.844 0.06523 .			$ nSerneg : int 19 22 20 24 24 24 22 24 8 23 ...
		fPeriod8 -1.32167 1.07238 -1.232 0.218			fPeriod8 -0.36563 0.39193 -0.933 0.350874			lgCoccin -0.14232 0.17406 -0.818 0.41358			Correlation of Fixed Effects:			fPeriod8 0.3329 0.4380 0.760 0.4473			lgLeafHop 0.10811 0.21387 0.505 0.613215						fPeriod9 0.6738 0.4084 1.650 0.098969 .			lgAervi 0.15325 0.14890 1.029 0.303371			$ nRickpos : int 2 6 7 3 6 1 4 3 0 1 ...			fPeriod9 -1.7539 0.7515 -2.334 0.01960 *			lgCoccin -0.53379 0.17928 -2.977 0.00291 **			$ nRickpos : int 2 6 7 3 6 1 4 3 0 1 ...			fPeriod9 1.3898 0.3433 4.049 5.15e-05 ***			lgCoccin -0.05610 0.13246 -0.424 0.67192			$ nRickpos : int 2 6 7 3 6 1 4 3 0 1 ...
		fPeriod9 0.56217 0.53095 1.059 0.290			fPeriod9 -1.65073 0.49693 -3.322 0.000894 ***			Psurv 1.66211 0.50248 3.308 0.00094 ***			(Intr) stdmVp lgAphD Psurv			fPeriod9 -2.2430 1.0372 -2.163 0.0306 *			lgCoccin 0.98893 0.27524 3.593 0.000327 ***						fPeriod10 -0.1482 0.5059 -0.293 0.769534			lgLeafHop 0.39517 0.11599 3.407 0.000657 ***			$ nRickneg : int 18 17 16 21 18 23 20 21 10 22 ...			fPeriod10 -0.8520 0.5174 -1.647 0.09961 .			Psurv -0.94132 0.74862 -1.257 0.20861			$ nRickneg : int 18 17 16 21 18 23 20 21 10 22 ...			fPeriod10 0.7462 0.3756 1.987 0.046950 *			Psurv -0.15050 0.47564 -0.316 0.75168			$ nRickneg : int 18 17 16 21 18 23 20 21 10 22 ...
		fPeriod10 -16.18964 1563.18039 -0.010 0.992			fPeriod10 -1.15977 0.43710 -2.653 0.007971 **			Paervi 0.51982 0.65057 0.799 0.42428			stdmaVap 0.016			fPeriod10 -1.5054 0.7591 -1.983 0.0473 *			Psurv -0.68056 0.86291 -0.789 0.430298						fPeriod11 0.6345 0.3930 1.615 0.106372			lgCoccin 0.21806 0.14672 1.486 0.137223			$ Regposprop : num 0.15 0.0435 0.0435 0.0833 0 ...			fPeriod11 -1.0473 0.5141 -2.037 0.04165 *			Paervi 0.56384 0.87183 0.647 0.51780			$ Regposprop : num 0.15 0.0435 0.0435 0.0833 0 ...			fPeriod11 0.9885 0.3440 2.874 0.004056 **			Paervi -0.67477 0.62588 -1.078 0.28098			$ Regposprop : num 0.15 0.0435 0.0435 0.0833 0 ...
		fPeriod11 -1.09533 0.79628 -1.376 0.169			fPeriod11 0.72871 0.27135 2.685 0.007243 **			Ppandora 0.15769 0.64382 0.245 0.80651			lgAphDen -0.749 0.230			fPeriod11 -1.3047 0.6383 -2.044 0.0409 *			Paervi 1.40494 1.04601 1.343 0.179227						fPeriod12 0.8814 0.3569 2.470 0.013514 *			Psurv -0.10175 0.50215 -0.203 0.839420			$ Regperc : num 15 4.35 4.35 8.33 0 ...			fPeriod12 -0.1671 0.3654 -0.457 0.64757			Ppandora 2.19176 0.75523 2.902 0.00371 **			$ Regperc : num 15 4.35 4.35 8.33 0 ...			fPeriod12 1.3587 0.3147 4.318 1.58e-05 ***			Ppandora 0.42903 0.57116 0.751 0.45256			$ Regperc : num 15 4.35 4.35 8.33 0 ...
		fPeriod12 -0.55582 0.61621 -0.902 0.367			fPeriod12 0.56756 0.25759 2.203 0.027568 *			---			Psurv -0.638 -0.282 0.242			fPeriod12 -0.1191 0.3947 -0.302 0.7628			Ppandora 1.68818 0.90484 1.866 0.062081 .						fPeriod13 1.6369 0.3324 4.924 8.47e-07 ***			Paervi -0.64328 0.67763 -0.949 0.342464			$ Serposprop : num 0.05 0.0435 0.1304 0 0 ...			fPeriod13 0.2983 0.3323 0.898 0.36938			---			$ Serposprop : num 0.05 0.0435 0.1304 0 0 ...			fPeriod13 1.1812 0.3193 3.699 0.000217 ***			---			$ Serposprop : num 0.05 0.0435 0.1304 0 0 ...
		fPeriod13 0.03082 0.52138 0.059 0.953			fPeriod13 -1.09584 0.35386 -3.097 0.001956 **			Signif. codes: 0 ‘***’ 0.001 ‘**’ 0.01 ‘*’ 0.05 ‘.’ 0.1 ‘ ’ 1			lag1Ppandor -0.515 0.117 0.357 0.410			fPeriod13 0.0503 0.3794 0.133 0.8945			---						fPeriod14 1.3583 0.3506 3.874 0.000107 ***			Ppandora 0.96366 0.58688 1.642 0.100591			$ Serperc : num 5 4.35 13.04 0 0 ...			fPeriod14 0.4864 0.3365 1.446 0.14830			Signif. codes: 0 ‘***’ 0.001 ‘**’ 0.01 ‘*’ 0.05 ‘.’ 0.1 ‘ ’ 1			$ Serperc : num 5 4.35 13.04 0 0 ...			fPeriod14 1.0040 0.3379 2.971 0.002965 **			Signif. codes: 0 ‘***’ 0.001 ‘**’ 0.01 ‘*’ 0.05 ‘.’ 0.1 ‘ ’ 1			$ Serperc : num 5 4.35 13.04 0 0 ...
		fPeriod14 0.25446 0.52478 0.485 0.628			fPeriod14 -0.40823 0.31713 -1.287 0.197994									fPeriod14 -0.8480 0.5231 -1.621 0.1050			Signif. codes: 0 ‘***’ 0.001 ‘**’ 0.01 ‘*’ 0.05 ‘.’ 0.1 ‘ ’ 1						---			---			$ Rickposprop : num 0.1 0.261 0.304 0.125 0.25 ...			---						$ Rickposprop : num 0.1 0.261 0.304 0.125 0.25 ...			---						$ Rickposprop : num 0.1 0.261 0.304 0.125 0.25 ...
		---			---			Correlation of Fixed Effects:			drop1(RklaAPLag)			---									Signif. codes: 0 ‘***’ 0.001 ‘**’ 0.01 ‘*’ 0.05 ‘.’ 0.1 ‘ ’ 1			Signif. codes: 0 ‘***’ 0.001 ‘**’ 0.01 ‘*’ 0.05 ‘.’ 0.1 ‘ ’ 1			$ Rickperc : num 10 26.1 30.4 12.5 25 ...			Signif. codes: 0 ‘***’ 0.001 ‘**’ 0.01 ‘*’ 0.05 ‘.’ 0.1 ‘ ’ 1			Correlation of Fixed Effects:			$ Rickperc : num 10 26.1 30.4 12.5 25 ...			Signif. codes: 0 ‘***’ 0.001 ‘**’ 0.01 ‘*’ 0.05 ‘.’ 0.1 ‘ ’ 1			Correlation of Fixed Effects:			$ Rickperc : num 10 26.1 30.4 12.5 25 ...
		Signif. codes: 0 ‘***’ 0.001 ‘**’ 0.01 ‘*’ 0.05 ‘.’ 0.1 ‘ ’ 1			Signif. codes: 0 ‘***’ 0.001 ‘**’ 0.01 ‘*’ 0.05 ‘.’ 0.1 ‘ ’ 1			(Intr) stdmTA stdmVp lgWngA lgAphD lgAerv lgLfHp lgCccn Psurv Paervi			Single term deletions			Signif. codes: 0 ‘***’ 0.001 ‘**’ 0.01 ‘*’ 0.05 ‘.’ 0.1 ‘ ’ 1			Correlation of Fixed Effects:												$ lag1.stdmaTA : num -1.2923 -0.7519 0.0638 0.1504 0.3875 ...						(Intr) stdmTA stdmVp lgWngA lgAphD lgAerv lgLfHp lgCccn Psurv Paervi			$ lag1.stdmaTA : num -1.2923 -0.7519 0.0638 0.1504 0.3875 ...						(Intr) stdmTA stdmVp lgWngA lgAphD lgAerv lgLfHp lgCccn Psurv Paervi			$ lag1.stdmaTA : num -1.2923 -0.7519 0.0638 0.1504 0.3875 ...
		RXPeriod <- update(XPeriod, .~. -fPeriod)			RRklaPeriod <- update(RklaPeriod, .~. -fPeriod)			stdmaTA -0.186									(Intr) stdmTA stdmVp lgWngA lgAphD lgAerv lgLfHp lgCccn Psurv Paervi						Correlation matrix not shown by default, as p = 14 > 12.			Correlation of Fixed Effects:			$ lag1.stdmaVap : num -0.0388 -0.2373 1.0483 -0.1196 -0.6134 ...			Correlation matrix not shown by default, as p = 14 > 12.			stdmaTA -0.086			$ lag1.stdmaVap : num -0.0388 -0.2373 1.0483 -0.1196 -0.6134 ...			Correlation matrix not shown by default, as p = 14 > 12.			stdmaTA -0.257			$ lag1.stdmaVap : num -0.0388 -0.2373 1.0483 -0.1196 -0.6134 ...
		anova(XPeriod, RXPeriod)			anova(RklaPeriod, RRklaPeriod)			stdmaVap -0.002 -0.538			Model:			Correlation matrix not shown by default, as p = 14 > 12.			stdmaTA -0.061						Use print(x, correlation=TRUE) or			(Intr) stdmTA stdmVp lgWngA lgAphD lgAerv lgLfHp lgCccn Psurv Paervi			$ lag1.WingAph : num 0 0.0146 0.08 0 0.0194 ...			Use print(x, correlation=TRUE) or			stdmaVap -0.052 -0.586			$ lag1.WingAph : num 0 0.0146 0.08 0 0.0194 ...			Use print(x, correlation=TRUE) or			stdmaVap 0.037 -0.539			$ lag1.WingAph : num 0 0.0146 0.08 0 0.0194 ...
		Data: DataforGlm			Data: DataforGlm			lgWingAph 0.551 -0.337 -0.086			cbind(nRklapos, nRklaneg) ~ stdmaVap + lgAphDen + Psurv + lag1Ppandora +			Use print(x, correlation=TRUE) or			stdmaVap 0.020 -0.518						vcov(x) if you need it			stdmaTA -0.152			$ lglag1Wing : num -3 -1.81 -1.09 -3 -1.69 ...			vcov(x) if you need it			lgWingAph 0.534 -0.124 -0.180			$ lglag1Wing : num -3 -1.81 -1.09 -3 -1.69 ...			vcov(x) if you need it			lgWingAph 0.536 -0.312 -0.126			$ lglag1Wing : num -3 -1.81 -1.09 -3 -1.69 ...
		Models:			Models:			lgAphDen -0.680 0.158 0.071 -0.328			(1 | fField)			vcov(x) if you need it			lgWingAph 0.428 -0.251 -0.152									stdmaVap 0.021 -0.539			$ lag1.AphidDens: num 395.33 154.5 6.25 23.75 51.5 ...						lgAphDen -0.524 0.004 0.218 -0.179			$ lag1.AphidDens: num 395.33 154.5 6.25 23.75 51.5 ...						lgAphDen -0.552 0.167 0.077 -0.250			$ lag1.AphidDens: num 395.33 154.5 6.25 23.75 51.5 ...
		RXPeriod: cbind(nXpos, nXneg) ~ (1 | fField)			RRklaPeriod: cbind(nRklapos, nRklaneg) ~ (1 | fField)			lgAervi 0.083 0.270 -0.445 0.099 -0.252			npar AIC						lgAphDen -0.610 0.013 0.049 -0.090						convergence code: 0			lgWingAph 0.436 -0.322 -0.124			$ lglag1AphD : num 2.597 2.189 0.796 1.376 1.712 ...			> SSerPeriod <- update(SerPeriod, .~. -fPeriod)			lgAervi -0.043 0.409 -0.489 0.107 -0.269			$ lglag1AphD : num 2.597 2.189 0.796 1.376 1.712 ...			> RRickPeriod<- update(RickPeriod, .~. -fPeriod)			lgAervi -0.041 0.357 -0.477 0.013 -0.216			$ lglag1AphD : num 2.597 2.189 0.796 1.376 1.712 ...
		XPeriod: cbind(nXpos, nXneg) ~ fPeriod + (1 | fField)			RklaPeriod: cbind(nRklapos, nRklaneg) ~ fPeriod + (1 | fField)			lgLeafHop -0.019 -0.414 0.042 0.237 0.189 0.051			<none> 367.10			optimizer (Nelder_Mead) convergence code: 0 (OK)			lgAervi 0.084 0.329 -0.460 0.116 -0.220						boundary (singular) fit: see ?isSingular			lgAphDen -0.563 0.050 0.086 -0.118			$ lag1.Aervi : num 34.5 26 0.5 1.25 2.5 ...			> anova(SSerPeriod, SerPeriod)			lgLeafHop 0.005 -0.361 0.079 0.071 0.144 0.090			$ lag1.Aervi : num 34.5 26 0.5 1.25 2.5 ...			> anova(RRickPeriod,RickPeriod)			lgLeafHop 0.098 -0.351 -0.033 0.226 0.093 0.065			$ lag1.Aervi : num 34.5 26 0.5 1.25 2.5 ...
		Df AIC BIC logLik deviance Chisq Chi Df Pr(>Chisq)			Df AIC BIC logLik deviance Chisq Chi Df Pr(>Chisq)			lgCoccin 0.362 -0.150 -0.079 0.350 -0.438 0.073 0.059			stdmaVap 1 384.83			boundary (singular) fit: see ?isSingular			lgLeafHop -0.079 -0.445 -0.044 0.212 0.244 0.154						> RRegPeriod<- update(RegPeriod, .~. -fPeriod)			lgAervi -0.016 0.336 -0.452 -0.015 -0.213			$ lglag1Aervi : num 1.539 1.417 -0.222 0.13 0.415 ...			Data: DataforGlm			lgCoccin 0.143 -0.116 -0.021 0.154 -0.223 0.033 0.063			$ lglag1Aervi : num 1.539 1.417 -0.222 0.13 0.415 ...			Data: DataforGlm			lgCoccin 0.097 -0.106 -0.061 0.178 -0.265 0.062 0.006			$ lglag1Aervi : num 1.539 1.417 -0.222 0.13 0.415 ...
		RXPeriod 2 230.16 234.82 -113.08 226.16	Removing the period improves the AIC. It is not a significant factor		RRklaPeriod 2 485.35 490.01 -240.67 481.35			Psurv -0.601 -0.162 0.019 -0.046 0.050 0.142 -0.220 -0.088			lgAphDen 1 366.07	Removal improves AIC					lgCoccin -0.026 -0.139 -0.175 0.311 -0.096 0.034 0.153						boundary (singular) fit: see ?isSingular			lgLeafHop -0.005 -0.391 0.041 0.243 0.179 0.041			$ lag1.LeafHop : num 0 5.25 0.75 51.5 120.25 ...			Models:			Psurv -0.571 -0.149 -0.064 0.027 -0.058 0.263 -0.277 0.053			$ lag1.LeafHop : num 0 5.25 0.75 51.5 120.25 ...			Models:			Psurv -0.576 -0.113 -0.047 -0.001 -0.084 0.212 -0.332 0.119			$ lag1.LeafHop : num 0 5.25 0.75 51.5 120.25 ...
		XPeriod 15 231.59 266.56 -100.80 201.59 24.561 13 0.02635 *			RklaPeriod 15 351.05 386.01 -160.53 321.05 160.29 13 < 2.2e-16 ***	Removing period lowers AIC, period is significant		Paervi -0.465 0.389 -0.250 -0.034 0.096 -0.200 -0.185 0.085 0.376			Psurv 1 376.61			RSpiroPeriod <- update(SpiroPeriod, .~. -fPeriod)			Psurv -0.520 -0.123 -0.086 0.070 -0.070 0.156 -0.257 0.130						> anova(RRegPeriod,RegPeriod)			lgCoccin 0.083 -0.149 -0.085 0.238 -0.196 0.025 0.065			$ lglag1LeafH : num -1 0.7284 -0.0706 1.7126 2.0804 ...			SSerPeriod: cbind(nSerpos, nSerneg) ~ (1 | fField)			Paervi -0.379 0.441 -0.361 0.029 -0.045 -0.060 -0.212 0.062 0.259			$ lglag1LeafH : num -1 0.7284 -0.0706 1.7126 2.0804 ...			RRickPeriod: cbind(nRickpos, nRickneg) ~ (1 | fField)			Paervi -0.471 0.383 -0.268 0.003 0.049 -0.139 -0.197 0.133 0.342			$ lglag1LeafH : num -1 0.7284 -0.0706 1.7126 2.0804 ...
		---			---			Ppandora -0.747 0.440 -0.039 -0.399 0.322 -0.074 -0.178 -0.193 0.489 0.685			lag1Ppandora 1 366.95	Removal improves AIC		anova(SpiroPeriod, RSpiroPeriod)			Paervi -0.457 0.319 -0.280 0.062 0.054 -0.206 -0.147 0.234 0.379						Data: DataforGlm			Psurv -0.575 -0.165 -0.062 0.046 -0.042 0.161 -0.289 0.101			$ lag1.Coccin : num 1.17 0 1 1 1.75 ...			SerPeriod: cbind(nSerpos, nSerneg) ~ fPeriod + (1 | fField)			Ppandora -0.680 0.420 -0.004 -0.307 0.113 0.065 -0.217 -0.012 0.395 0.652			$ lag1.Coccin : num 1.17 0 1 1 1.75 ...			RickPeriod: cbind(nRickpos, nRickneg) ~ fPeriod + (1 | fField)			Ppandora -0.721 0.497 -0.083 -0.332 0.169 0.036 -0.226 0.019 0.433 0.659			$ lag1.Coccin : num 1.17 0 1 1 1.75 ...
		Signif. codes: 0 ‘***’ 0.001 ‘**’ 0.01 ‘*’ 0.05 ‘.’ 0.1 ‘ ’ 1			Signif. codes: 0 ‘***’ 0.001 ‘**’ 0.01 ‘*’ 0.05 ‘.’ 0.1 ‘ ’ 1			drop1(FullRklaMod)						Data: DataforGlm			Ppandora -0.663 0.328 0.019 -0.243 0.123 -0.089 -0.228 0.048 0.490 0.699						Models:			Paervi -0.463 0.342 -0.245 0.053 0.047 -0.169 -0.186 0.167 0.359			$ loglg1Coccin : num 0.1027 -1 0.0414 0.0414 0.2672 ...			npar AIC BIC logLik deviance Chisq Df Pr(>Chisq)			convergence code: 0			$ loglg1Coccin : num 0.1027 -1 0.0414 0.0414 0.2672 ...			npar AIC BIC logLik deviance Chisq Df Pr(>Chisq)			> print(OriRickMod, correlation=TRUE)			$ loglg1Coccin : num 0.1027 -1 0.0414 0.0414 0.2672 ...
								Single term deletions			RklaAPLag2 <- update(RklaAPLag, .~. -lgAphDen)			Models:			optimizer (Nelder_Mead) convergence code: 0 (OK)						RRegPeriod: cbind(nRegpos, nRegneg) ~ (1 | fField)			Ppandora -0.696 0.467 -0.080 -0.290 0.139 0.000 -0.169 -0.005 0.406 0.672			$ lag1.Psurv : num 0.15 0.025 0.386 0.5 0.64 ...			SSerPeriod 2 300.53 305.19 -148.26 296.53			boundary (singular) fit: see ?isSingular			$ lag1.Psurv : num 0.15 0.025 0.386 0.5 0.64 ...			RRickPeriod 2 370.78 375.44 -183.39 366.78			Generalized linear mixed model fit by maximum likelihood (Laplace Approximation) ['glmerMod']			$ lag1.Psurv : num 0.15 0.025 0.386 0.5 0.64 ...
											anova(RklaAPLag2, RklaAPLag)			RSpiroPeriod: cbind(nSpipos, nSpineg) ~ (1 | fField)			boundary (singular) fit: see ?isSingular						RegPeriod: cbind(nRegpos, nRegneg) ~ fPeriod + (1 | fField)			convergence code: 0			$ lag1.Paervi : num 0.45 0.3 0.295 0.267 0.2 ...			SerPeriod 15 263.67 298.63 -116.83 233.67 62.86 13 1.609e-08 ***						$ lag1.Paervi : num 0.45 0.3 0.295 0.267 0.2 ...			RickPeriod 15 352.20 387.16 -161.10 322.20 44.58 13 2.459e-05 ***			Family: binomial ( logit )			$ lag1.Paervi : num 0.45 0.3 0.295 0.267 0.2 ...
								Model:			Data: LagGLM			SpiroPeriod: cbind(nSpipos, nSpineg) ~ fPeriod + (1 | fField)									npar AIC BIC logLik deviance Chisq Df Pr(>Chisq)			boundary (singular) fit: see ?isSingular			$ lag1.Ppandora : num 0.125 0.175 0.2955 0.0667 0 ...			---			> print(OriSerMod, correlation=TRUE)			$ lag1.Ppandora : num 0.125 0.175 0.2955 0.0667 0 ...			---			Formula: cbind(nRickpos, nRickneg) ~ stdmaTA + stdmaVap + lgWingAph +			$ lag1.Ppandora : num 0.125 0.175 0.2955 0.0667 0 ...
								cbind(nRklapos, nRklaneg) ~ stdmaTA + stdmaVap + lgWingAph +			Models:			npar AIC BIC logLik deviance Chisq Df Pr(>Chisq)			drop1(FullSpiroMod)						RRegPeriod 2 359.89 364.55 -177.94 355.89						> DataforGlm$fField <- factor(DataforGlm$Field)			Signif. codes: 0 ‘***’ 0.001 ‘**’ 0.01 ‘*’ 0.05 ‘.’ 0.1 ‘ ’ 1			Generalized linear mixed model fit by maximum likelihood (Laplace Approximation) ['glmerMod']			> DataforGlm$fField <- factor(DataforGlm$Field)			Signif. codes: 0 ‘***’ 0.001 ‘**’ 0.01 ‘*’ 0.05 ‘.’ 0.1 ‘ ’ 1			lgAphDen + lgAervi + lgLeafHop + lgCoccin + Psurv + Paervi + Ppandora + (1 | fField)			> DataforGlm$fField <- factor(DataforGlm$Field)
								lgAphDen + lgAervi + lgLeafHop + lgCoccin + Psurv + Paervi +			RklaAPLag2: cbind(nRklapos, nRklaneg) ~ stdmaVap + Psurv + lag1Ppandora +			RSpiroPeriod 2 255.79 260.45 -125.90 251.79			Single term deletions						RegPeriod 15 328.87 363.83 -149.43 298.87 57.025 13 1.777e-07 ***	AIC is lower with period, period is definitely significant		> drop1(ORegMod)			> DataforGlm$fPeriod <- factor(DataforGlm$Period)						Family: binomial ( logit )			> DataforGlm$fPeriod <- factor(DataforGlm$Period)						Data: DataforGlm			> DataforGlm$fPeriod <- factor(DataforGlm$Period)
								Ppandora + (1 | fField)			RklaAPLag2: (1 | fField)			SpiroPeriod 15 244.46 279.42 -107.23 214.46 37.328 13 0.000368 ***	AIC is lower with period, period is definitely significant								---			Single term deletions			> RedOReg4 = glmer(cbind(nRegpos,nRegneg)~lgAphDen + lgLeafHop + Ppandora + (1 | fField), family = binomial, data = DataforGlm)						Formula: cbind(nSerpos, nSerneg) ~ stdmaTA + stdmaVap + lgWingAph + lgAphDen +			> OriSer8n= glmer(cbind(nSerpos,nSerneg)~lgLeafHop + lgCoccin + Ppandora + (1|fField), family = binomial, data = DataforGlm)						AIC BIC logLik deviance df.resid			> OriRick7n= glmer(cbind(nRickpos,nRickneg)~lgAervi + lgLeafHop + Paervi + (1|fField), family = binomial, data = DataforGlm)
								Df AIC			RklaAPLag: cbind(nRklapos, nRklaneg) ~ stdmaVap + lgAphDen + Psurv + lag1Ppandora +			---			Model:						Signif. codes: 0 ‘***’ 0.001 ‘**’ 0.01 ‘*’ 0.05 ‘.’ 0.1 ‘ ’ 1												lgAervi + lgLeafHop + lgCoccin + Psurv + Paervi + Ppandora + (1 | fField)			> AddSer <- update(OriSer8n, .~. +lag1.Aervi +lglag1Aervi +lag1.Coccin +loglg1Coccin +lag1.stdmaTA +lag1.stdmaVap)						365.1817 393.1505 -170.5909 341.1817 64			> AddRick <- update(OriRick7n, .~. +lag1.stdmaTA +lag1.Ppandora)
								<none> 463.33			RklaAPLag: (1 | fField)			Signif. codes: 0 ‘***’ 0.001 ‘**’ 0.01 ‘*’ 0.05 ‘.’ 0.1 ‘ ’ 1			cbind(nSpipos, nSpineg) ~ stdmaTA + stdmaVap + lgWingAph + lgAphDen +									Lower AIC when dropped			> AddReg <- update(RedOReg4, .~. +lag1.Coccin +loglg1Coccin +lag1.WingAph +lglag1Wing +lag1.stdmaTA +lag1.stdmaVap)						Data: DataforGlm			> anova(OriSer8n, AddSer)						Random effects:			> anova(OriRick7n, AddRick)
								stdmaTA 1 462.35	AIC lower when dropped		npar AIC BIC logLik deviance Chisq Df Pr(>Chisq)						lgAervi + lgLeafHop + lgCoccin + Psurv + Paervi + Ppandora +									cbind(nRegpos, nRegneg) ~ stdmaTA + stdmaVap + lgWingAph + lgAphDen +									AIC BIC logLik deviance df.resid			Data: DataforGlm						Groups Name Std.Dev.			Data: DataforGlm
								stdmaVap 1 468.87			RklaAPLag2 5 366.07 376.79 -178.04 356.07	No significant difference between the two models					(1 | fField)									lgAervi + lgLeafHop + lgCoccin + Psurv + Paervi + Ppandora +			> anova(RedOReg4,AddReg)						263.8204 291.7892 -119.9102 239.8204 64			Models:						fField (Intercept) 0.04776			Models:
								lgWingAph 1 461.76	AIC lower when dropped		RklaAPLag 6 367.10 379.96 -177.55 355.10 0.9701 1 0.3247						npar AIC									(1 | fField)			Data: DataforGlm						Random effects:			OriSer8n: cbind(nSerpos, nSerneg) ~ lgLeafHop + lgCoccin + Ppandora + (1 |						Number of obs: 76, groups: fField, 6			OriRick7n: cbind(nRickpos, nRickneg) ~ lgAervi + lgLeafHop + Paervi + (1 |
								lgAphDen 1 470.24									<none> 225.96									npar AIC			Models:						Groups Name Std.Dev.			OriSer8n: fField)						Fixed Effects:			OriRick7n: fField)
								lgAervi 1 461.36	Lowest AIC when dropped		drop1(RklaAPLag2)						stdmaTA 1 224.04	AIC lower when dropped								<none> 338.47			RedOReg4: cbind(nRegpos, nRegneg) ~ lgAphDen + lgLeafHop + Ppandora + (1 |						fField (Intercept) 0			AddSer: cbind(nSerpos, nSerneg) ~ lgLeafHop + lgCoccin + Ppandora + (1 |						(Intercept) stdmaTA stdmaVap lgWingAph lgAphDen lgAervi lgLeafHop lgCoccin			AddRick: cbind(nRickpos, nRickneg) ~ lgAervi + lgLeafHop + Paervi + (1 |
								lgLeafHop 1 461.40	AIC lower when dropped		Single term deletions						stdmaVap 1 224.11	AIC lower when dropped								stdmaTA 1 336.59	Lower AIC when dropped		RedOReg4: fField)						Number of obs: 76, groups: fField, 6			AddSer: fField) + lag1.Aervi + lglag1Aervi + lag1.Coccin + loglg1Coccin +						-1.20171 0.19987 -0.07325 0.04531 0.01980 -0.19401 -0.20189 -0.05610			AddRick: fField) + lag1.stdmaTA + lag1.Ppandora
								lgCoccin 1 462.01	AIC lower when dropped								lgWingAph 1 224.01	Lowest AIC when dropped								stdmaVap 1 338.36	Lower AIC when dropped		AddReg: cbind(nRegpos, nRegneg) ~ lgAphDen + lgLeafHop + Ppandora + (1 |						Fixed Effects:			AddSer: lag1.stdmaTA + lag1.stdmaVap						Psurv Paervi Ppandora			npar AIC BIC logLik deviance Chisq Df Pr(>Chisq)
								Psurv 1 472.31			Model:						lgAphDen 1 239.56									lgWingAph 1 340.39			AddReg: fField) + lag1.Coccin + loglg1Coccin + lag1.WingAph + lglag1Wing +						(Intercept) stdmaTA stdmaVap lgWingAph lgAphDen lgAervi lgLeafHop lgCoccin			npar AIC BIC logLik deviance Chisq Df Pr(>Chisq)						-0.15050 -0.67477 0.42903			OriRick7n 5 284.89 295.60 -137.44 274.89
								Paervi 1 461.97	AIC lower when dropped		cbind(nRklapos, nRklaneg) ~ stdmaVap + Psurv + lag1Ppandora +						lgAervi 1 228.06									lgAphDen 1 338.13	Lower AIC when dropped		AddReg: lag1.stdmaTA + lag1.stdmaVap						-3.08855 0.59958 -0.06812 -0.24746 0.23792 -0.19114 -0.54013 -0.53379			OriSer8n 5 200.83 211.54 -95.413 190.83						> drop1(OriRickMod)			AddRick 7 283.77 298.77 -134.88 269.77 5.1163 2 0.07745 .
								Ppandora 1 461.39	AIC lower when dropped		(1 | fField)						lgLeafHop 1 224.21	AIC lower when dropped								lgAervi 1 337.53	Lower AIC when dropped		npar AIC BIC logLik deviance Chisq Df Pr(>Chisq)						Psurv Paervi Ppandora			AddSer 11 198.12 221.69 -88.058 176.12 14.709 6 0.02264 *						boundary (singular) fit: see ?isSingular			---
								RedRkla1 <- update(FullRklaMod, .~. -lgLeafHop)			npar AIC						lgCoccin 1 238.60									lgLeafHop 1 348.17			RedOReg4 5 277.08 287.79 -133.54 267.08						-0.94132 0.56384 2.19176			---						Single term deletions			Signif. codes: 0 ‘***’ 0.001 ‘**’ 0.01 ‘*’ 0.05 ‘.’ 0.1 ‘ ’ 1
								anova(FullRklaMod, RedRkla1)			<none> 366.07						Psurv 1 224.58	AIC lower when dropped								lgCoccin 1 338.72			AddReg 11 285.02 308.60 -131.51 263.02 4.0554 6 0.6692	Adding lagged variables makes the model worse					convergence code 0; 0 optimizer warnings; 1 lme4 warnings			Signif. codes: 0 ‘***’ 0.001 ‘**’ 0.01 ‘*’ 0.05 ‘.’ 0.1 ‘ ’ 1									> drop1(AddRick)
								Data: DataforGlm			stdmaVap 1 386.79						Paervi 1 225.73									Psurv 1 336.51	Lower AIC when dropped		> drop1(AddReg)									> drop1(AddSer)						Model:			Single term deletions
								Models:			Psurv 1 374.64						Ppandora 1 227.42									Paervi 1 337.38	Lower AIC when dropped		boundary (singular) fit: see ?isSingular						> drop1(OriSerMod)			Single term deletions						cbind(nRickpos, nRickneg) ~ stdmaTA + stdmaVap + lgWingAph +
								RedRkla1: cbind(nRklapos, nRklaneg) ~ stdmaTA + stdmaVap + lgWingAph +			lag1Ppandora 1 367.49	AIC worse if removed, but not by huge margins														Ppandora 1 339.16			boundary (singular) fit: see ?isSingular						Single term deletions									lgAphDen + lgAervi + lgLeafHop + lgCoccin + Psurv + Paervi +			Model:
								RedRkla1: lgAphDen + lgAervi + lgCoccin + Psurv + Paervi + Ppandora +									RedSpiro1 <- update(FullSpiroMod, .~. -lgWingAph)												boundary (singular) fit: see ?isSingular									Model:						Ppandora + (1 | fField)			cbind(nRickpos, nRickneg) ~ lgAervi + lgLeafHop + Paervi + (1 |
								RedRkla1: (1 | fField)			summary(RklaAPLag2)						anova(FullSpiroMod, RedSpiro1)									> RedOReg1 <- update(ORegMod, .~. -stdmaTA -Paervi -Psurv -lgAervi)			boundary (singular) fit: see ?isSingular						Model:			cbind(nSerpos, nSerneg) ~ lgLeafHop + lgCoccin + Ppandora + (1 |						npar AIC			fField) + lag1.stdmaTA + lag1.Ppandora
								FullRklaMod: cbind(nRklapos, nRklaneg) ~ stdmaTA + stdmaVap + lgWingAph +			Generalized linear mixed model fit by maximum likelihood (Laplace Approximation) ['glmerMod']						Data: DataforGlm									> anova(ORegMod, RedOReg1)			boundary (singular) fit: see ?isSingular						cbind(nSerpos, nSerneg) ~ stdmaTA + stdmaVap + lgWingAph + lgAphDen +			fField) + lag1.Aervi + lglag1Aervi + lag1.Coccin + loglg1Coccin +						<none> 365.18			npar AIC
								FullRklaMod: lgAphDen + lgAervi + lgLeafHop + lgCoccin + Psurv + Paervi +			Family: binomial ( logit )						Models:									Data: DataforGlm			boundary (singular) fit: see ?isSingular						lgAervi + lgLeafHop + lgCoccin + Psurv + Paervi + Ppandora +			lag1.stdmaTA + lag1.stdmaVap						stdmaTA 1 364.33	Lower AIC when dropped		<none> 283.77
								FullRklaMod: Ppandora + (1 | fField)			Formula: cbind(nRklapos, nRklaneg) ~ stdmaVap + Psurv + lag1Ppandora + (1 | fField)						RedSpiro1: cbind(nSpipos, nSpineg) ~ stdmaTA + stdmaVap + lgAphDen + lgAervi +									Models:			boundary (singular) fit: see ?isSingular						(1 | fField)			npar AIC						stdmaVap 1 363.65	Lower AIC when dropped		lgAervi 1 281.79
								npar AIC BIC logLik deviance Chisq Df Pr(>Chisq)			Data: LagGLM						RedSpiro1: lgLeafHop + lgCoccin + Psurv + Paervi + Ppandora + (1 | fField)									RedOReg1: cbind(nRegpos, nRegneg) ~ stdmaVap + lgWingAph + lgAphDen + lgLeafHop +			boundary (singular) fit: see ?isSingular						npar AIC			<none> 198.12						lgWingAph 1 363.37	Lower AIC when dropped		lgLeafHop 1 287.93
								RedRkla1 11 461.40 487.03 -219.70 439.40									FullSpiroMod: cbind(nSpipos, nSpineg) ~ stdmaTA + stdmaVap + lgWingAph + lgAphDen +									RedOReg1: lgCoccin + Ppandora + (1 | fField)			Single term deletions						<none> 263.82			lgLeafHop 1 196.87						lgAphDen 1 363.21	Lower AIC when dropped		Paervi 1 281.80
								FullRklaMod 12 463.33 491.30 -219.67 439.33 0.0616 1 0.804	Removal of lgLeafHop lowers AIC, imporves model		AIC BIC logLik deviance df.resid						FullSpiroMod: lgAervi + lgLeafHop + lgCoccin + Psurv + Paervi + Ppandora +									ORegMod: cbind(nRegpos, nRegneg) ~ stdmaTA + stdmaVap + lgWingAph + lgAphDen +									stdmaTA 1 265.58			lgCoccin 1 201.43						lgAervi 1 364.96	Lower AIC when dropped		lag1.stdmaTA 1 284.76
								drop1(RedRkla1)			366.1 376.8 -178.0 356.1 58						FullSpiroMod: (1 | fField)									ORegMod: lgAervi + lgLeafHop + lgCoccin + Psurv + Paervi + Ppandora +			Model:						stdmaVap 1 261.93	Lowest AIC when dropped		Ppandora 1 209.71						lgLeafHop 1 366.64			lag1.Ppandora 1 285.56
								Single term deletions									npar AIC BIC logLik deviance Chisq Df Pr(>Chisq)									ORegMod: (1 | fField)			cbind(nRegpos, nRegneg) ~ lgAphDen + lgLeafHop + Ppandora + (1 |						lgWingAph 1 264.06			lag1.Aervi 1 196.12						lgCoccin 1 363.36	Lower AIC when dropped		> AddRick1 <- update(AddRick, .~. -lgAervi)
											Scaled residuals:						RedSpiro1 11 224.01 249.65 -101.00 202.01	AIC is lower but no significant difference between the models								npar AIC BIC logLik deviance Chisq Df Pr(>Chisq)			fField) + lag1.Coccin + loglg1Coccin + lag1.WingAph + lglag1Wing +						lgAphDen 1 263.88			lglag1Aervi 1 198.65						Psurv 1 363.28	Lower AIC when dropped		> anova(AddRick, AddRick1)
								Model:			Min 1Q Median 3Q Max						FullSpiroMod 12 225.96 253.92 -100.98 201.96 0.0519 1 0.8198									RedOReg1 8 332.45 351.10 -158.23 316.45			lag1.stdmaTA + lag1.stdmaVap						lgAervi 1 262.42			lag1.Coccin 1 196.12						Paervi 1 364.36	Lower AIC when dropped		Data: DataforGlm
								cbind(nRklapos, nRklaneg) ~ stdmaTA + stdmaVap + lgWingAph +			-2.6216 -1.3629 -0.4434 1.2028 3.5963															ORegMod 12 338.47 366.44 -157.24 314.47 1.9829 4 0.7389	No significant difference after dropping		npar AIC						lgLeafHop 1 271.13			loglg1Coccin 1 196.40						Ppandora 1 363.75	Lower AIC when dropped		Models:
								lgAphDen + lgAervi + lgCoccin + Psurv + Paervi + Ppandora +									drop1(RedSpiro1)												<none> 285.02						lgCoccin 1 268.66			lag1.stdmaTA 1 196.15						> OriRick1 <- update(OriRickMod, .~. -stdmaTA)			AddRick1: cbind(nRickpos, nRickneg) ~ lgLeafHop + Paervi + (1 | fField) +
								(1 | fField)			Random effects:						Single term deletions									> drop1(RedOReg1)			lgAphDen 1 292.87						Psurv 1 263.42			lag1.stdmaVap 1 200.84						> anova(OriRickMod, OriRick1)			AddRick1: lag1.stdmaTA + lag1.Ppandora
								npar AIC			Groups Name Variance Std.Dev.															Single term deletions			lgLeafHop 1 291.22						Paervi 1 262.24			> Addser1 <- update(AddSer, .~. -lag1.Coccin -loglg1Coccin)						Data: DataforGlm			AddRick: cbind(nRickpos, nRickneg) ~ lgAervi + lgLeafHop + Paervi + (1 |
								<none> 461.40			fField (Intercept) 0.1674 0.4091						Model:												Ppandora 1 297.03						Ppandora 1 269.75			> anova(AddSer, Addser1)						Models:			AddRick: fField) + lag1.stdmaTA + lag1.Ppandora
								stdmaTA 1 460.38	AIC lower when dropped		Number of obs: 63, groups: fField, 6						cbind(nSpipos, nSpineg) ~ stdmaTA + stdmaVap + lgAphDen + lgAervi +									Model:			lag1.Coccin 1 284.15	All the added lagged variables make the model better after removal								Data: DataforGlm						OriRick1: cbind(nRickpos, nRickneg) ~ stdmaVap + lgWingAph + lgAphDen +			npar AIC BIC logLik deviance Chisq Df Pr(>Chisq)
								stdmaVap 1 466.98									lgLeafHop + lgCoccin + Psurv + Paervi + Ppandora + (1 | fField)									cbind(nRegpos, nRegneg) ~ stdmaVap + lgWingAph + lgAphDen + lgLeafHop +			loglg1Coccin 1 283.64	All the added lagged variables make the model better after removal					> OriSer1 <- update(OriSerMod, .~. -stdmaVap)			Models:						OriRick1: lgAervi + lgLeafHop + lgCoccin + Psurv + Paervi + Ppandora +			AddRick1 6 281.79 294.65 -134.90 269.79
								lgWingAph 1 459.77	AIC lower when dropped		Fixed effects:						npar AIC									lgCoccin + Ppandora + (1 | fField)			lag1.WingAph 1 285.02	All the added lagged variables make the model better after removal					> anova(OriSerMod, OriSer1)			Addser1: cbind(nSerpos, nSerneg) ~ lgLeafHop + lgCoccin + Ppandora + (1 |						OriRick1: (1 | fField)			AddRick 7 283.77 298.77 -134.88 269.77 0.0199 1 0.8878
								lgAphDen 1 468.34			Estimate Std. Error z value Pr(>|z|)						<none> 224.01									npar AIC			lglag1Wing 1 283.09	All the added lagged variables make the model better after removal					Data: DataforGlm	No significant difference after dropping		Addser1: fField) + lag1.Aervi + lglag1Aervi + lag1.stdmaTA + lag1.stdmaVap						OriRickMod: cbind(nRickpos, nRickneg) ~ stdmaTA + stdmaVap + lgWingAph +			> drop1(AddRick1)
								lgAervi 1 459.42	Lowest AIC when dropped		(Intercept) -2.13921 0.26345 -8.120 4.66e-16 ***						stdmaTA 1 222.14	Tied lowest AIC when dropped								<none> 332.45			lag1.stdmaTA 1 283.25	All the added lagged variables make the model better after removal					Models:			AddSer: cbind(nSerpos, nSerneg) ~ lgLeafHop + lgCoccin + Ppandora + (1 |						OriRickMod: lgAphDen + lgAervi + lgLeafHop + lgCoccin + Psurv + Paervi +			Single term deletions
								lgCoccin 1 460.10	AIC lower when dropped		stdmaVap -0.42074 0.09203 -4.572 4.83e-06 ***	Vapor deficit is significant					stdmaVap 1 222.14	Tied lowest AIC when dropped								stdmaVap 1 333.29			lag1.stdmaVap 1 283.15	All the added lagged variables make the model better after removal					OriSer1: cbind(nSerpos, nSerneg) ~ stdmaTA + lgWingAph + lgAphDen + lgAervi +			AddSer: fField) + lag1.Aervi + lglag1Aervi + lag1.Coccin + loglg1Coccin +						OriRickMod: Ppandora + (1 | fField)
								Psurv 1 471.38			Psurv 1.02488 0.31869 3.216 0.0013 **	Overall survival is significant					lgAphDen 1 237.59									lgWingAph 1 334.40			> summary(RedOReg4)						OriSer1: lgLeafHop + lgCoccin + Psurv + Paervi + Ppandora + (1 | fField)			AddSer: lag1.stdmaTA + lag1.stdmaVap						npar AIC BIC logLik deviance Chisq Df Pr(>Chisq)			Model:
								Paervi 1 460.13	AIC lower when dropped		lag1Ppandora -0.83573 0.46240 -1.807 0.0707 .	Pandora is marginally significant					lgAervi 1 226.07									lgAphDen 1 333.26			Generalized linear mixed model fit by maximum likelihood (Laplace Approximation) ['glmerMod']	The final model is the simutaneous analysis model					OriSerMod: cbind(nSerpos, nSerneg) ~ stdmaTA + stdmaVap + lgWingAph + lgAphDen +			npar AIC BIC logLik deviance Chisq Df Pr(>Chisq)						OriRick1 11 364.33 389.97 -171.16 342.33			cbind(nRickpos, nRickneg) ~ lgLeafHop + Paervi + (1 | fField) +
								Ppandora 1 459.48	AIC lower when dropped		---						lgLeafHop 1 222.33	AIC lower when dropped								lgLeafHop 1 345.80			Family: binomial ( logit )						OriSerMod: lgAervi + lgLeafHop + lgCoccin + Psurv + Paervi + Ppandora +			Addser1 9 194.85 214.14 -88.425 176.85						OriRickMod 12 365.18 393.15 -170.59 341.18 1.1467 1 0.2842	No significant difference after dropping		lag1.stdmaTA + lag1.Ppandora
								anova(RedRkla1, RedRkla2)			Signif. codes: 0 ‘***’ 0.001 ‘**’ 0.01 ‘*’ 0.05 ‘.’ 0.1 ‘ ’ 1						lgCoccin 1 238.70									lgCoccin 1 332.87	Lower AIC when dropped		Formula: cbind(nRegpos, nRegneg) ~ lgAphDen + lgLeafHop + Ppandora + (1 | fField)						OriSerMod: (1 | fField)			AddSer 11 198.12 221.69 -88.058 176.12 0.7329 2 0.6932						> drop1(OriRick1)			npar AIC
																	Psurv 1 222.61	AIC lower when dropped								Ppandora 1 344.96			Data: DataforGlm						npar AIC BIC logLik deviance Chisq Df Pr(>Chisq)			> drop1(Addser1)						boundary (singular) fit: see ?isSingular			<none> 281.79
								Data: DataforGlm			Correlation of Fixed Effects:						Paervi 1 223.84	AIC lower when dropped																	OriSer1 11 261.93 287.56 -119.96 239.93			Single term deletions						boundary (singular) fit: see ?isSingular			lgLeafHop 1 286.24
								Models:			(Intr) stdmVp Psurv						Ppandora 1 225.46									> RedOReg2 <- update(RedOReg1, .~. -lgCoccin)			AIC BIC logLik deviance df.resid						OriSerMod 12 263.82 291.79 -119.91 239.82 0.1061 1 0.7446									Single term deletions			Paervi 1 279.82
								RedRkla2: cbind(nRklapos, nRklaneg) ~ stdmaTA + stdmaVap + lgWingAph +			stdmaVap 0.282															> anova(RedOReg1, RedOReg2)			277.1 287.8 -133.5 267.1 58									Model:									lag1.stdmaTA 1 284.21
								RedRkla2: lgAphDen + lgCoccin + Psurv + Paervi + Ppandora + (1 | fField)			Psurv -0.695 -0.350						RedSpiro2 <- update(RedSpiro1, .~. -stdmaTA -stdmaVap)									Data: DataforGlm									> drop1(OriSer1)			cbind(nSerpos, nSerneg) ~ lgLeafHop + lgCoccin + Ppandora + (1 |						Model:			lag1.Ppandora 1 283.61
								RedRkla1: cbind(nRklapos, nRklaneg) ~ stdmaTA + stdmaVap + lgWingAph +			lag1Ppandor -0.390 0.044 0.356						anova(RedSpiro1, RedSpiro2)									Models:			Scaled residuals:						Single term deletions			fField) + lag1.Aervi + lglag1Aervi + lag1.stdmaTA + lag1.stdmaVap						cbind(nRickpos, nRickneg) ~ stdmaVap + lgWingAph + lgAphDen +			> AddRick2 <- update(AddRick1, .~. -Paervi)
								RedRkla1: lgAphDen + lgAervi + lgCoccin + Psurv + Paervi + Ppandora +									Data: DataforGlm									RedOReg2: cbind(nRegpos, nRegneg) ~ stdmaVap + lgWingAph + lgAphDen + lgLeafHop +			Min 1Q Median 3Q Max									npar AIC						lgAervi + lgLeafHop + lgCoccin + Psurv + Paervi + Ppandora +			> anova(AddRick2, AddRick1)
								RedRkla1: (1 | fField)									Models:									RedOReg2: Ppandora + (1 | fField)			-3.1041 -0.9368 -0.1644 0.7640 3.1640						Model:			<none> 194.85						(1 | fField)			Data: DataforGlm
								npar AIC BIC logLik deviance Chisq Df Pr(>Chisq)									RedSpiro2: cbind(nSpipos, nSpineg) ~ lgAphDen + lgAervi + lgLeafHop + lgCoccin +									RedOReg1: cbind(nRegpos, nRegneg) ~ stdmaVap + lgWingAph + lgAphDen + lgLeafHop +									cbind(nSerpos, nSerneg) ~ stdmaTA + lgWingAph + lgAphDen + lgAervi +			lgLeafHop 1 193.56						npar AIC			Models:
								RedRkla2 10 459.42 482.73 -219.71 439.42	AIC is lower but no significant difference between models								RedSpiro2: Psurv + Paervi + Ppandora + (1 | fField)									RedOReg1: lgCoccin + Ppandora + (1 | fField)			Random effects:						lgLeafHop + lgCoccin + Psurv + Paervi + Ppandora + (1 | fField)			lgCoccin 1 199.30						<none> 364.33			AddRick2: cbind(nRickpos, nRickneg) ~ lgLeafHop + (1 | fField) + lag1.stdmaTA +
								RedRkla1 11 461.40 487.03 -219.70 439.40 0.027 1 0.8695									RedSpiro1: cbind(nSpipos, nSpineg) ~ stdmaTA + stdmaVap + lgAphDen + lgAervi +									npar AIC BIC logLik deviance Chisq Df Pr(>Chisq)			Groups Name Variance Std.Dev.						npar AIC			Ppandora 1 207.22						stdmaVap 1 362.35	Lower AIC when dropped		AddRick2: lag1.Ppandora
																	RedSpiro1: lgLeafHop + lgCoccin + Psurv + Paervi + Ppandora + (1 | fField)									RedOReg2 7 332.87 349.19 -159.44 318.87			fField (Intercept) 0 0						<none> 261.93			lag1.Aervi 1 192.85						lgWingAph 1 362.97	Lower AIC when dropped		AddRick1: cbind(nRickpos, nRickneg) ~ lgLeafHop + Paervi + (1 | fField) +
								drop1(RedRkla2)									npar AIC BIC logLik deviance Chisq Df Pr(>Chisq)									RedOReg1 8 332.45 351.10 -158.23 316.45 2.4212 1 0.1197	No significant difference after dropping		Number of obs: 63, groups: fField, 6						stdmaTA 1 264.46			lglag1Aervi 1 195.92						lgAphDen 1 362.33	Lower AIC when dropped		AddRick1: lag1.stdmaTA + lag1.Ppandora
								Single term deletions									RedSpiro2 9 220.17 241.15 -101.08 202.17	AIC is lower but no significant difference between the models																	lgWingAph 1 262.39			lag1.stdmaTA 1 192.89						lgAervi 1 365.66			npar AIC BIC logLik deviance Chisq Df Pr(>Chisq)
																	RedSpiro1 11 224.01 249.65 -101.00 202.01 0.1635 2 0.9215									> drop1(RedOReg2)			Fixed effects:						lgAphDen 1 262.23			lag1.stdmaVap 1 197.86						lgLeafHop 1 364.86			AddRick2 5 279.82 290.54 -134.91 269.82
								Model:																		Single term deletions			Estimate Std. Error z value Pr(>|z|)						lgAervi 1 261.08			> Addser2 <- update(Addser1, .~. -lag1.stdmaTA)						lgCoccin 1 362.42			AddRick1 6 281.79 294.65 -134.90 269.79 0.0346 1 0.8525
								cbind(nRklapos, nRklaneg) ~ stdmaTA + stdmaVap + lgWingAph +									drop1(RedSpiro2)												(Intercept) -2.8374 0.3142 -9.029 < 2e-16 ***						lgLeafHop 1 269.14			> anova(Addser2, Addser1)						Psurv 1 362.37	Lower AIC when dropped		> drop1(AddRick2)
								lgAphDen + lgCoccin + Psurv + Paervi + Ppandora + (1 | fField)									Single term deletions									Model:			lgAphDen 0.3871 0.1306 2.964 0.003033 **						lgCoccin 1 266.77			Data: DataforGlm						Paervi 1 364.97			Single term deletions
								npar AIC																		cbind(nRegpos, nRegneg) ~ stdmaVap + lgWingAph + lgAphDen + lgLeafHop +			lgLeafHop 0.2877 0.1135 2.534 0.011278 *						Psurv 1 261.58			Models:						Ppandora 1 362.39	Lower AIC when dropped
								<none> 459.42									Model:									Ppandora + (1 | fField)			Ppandora 1.5278 0.4145 3.686 0.000228 ***						Paervi 1 260.25	Lowest AIC when dropped		Addser2: cbind(nSerpos, nSerneg) ~ lgLeafHop + lgCoccin + Ppandora + (1 |						> OriRick1 <- update(OriRickMod, .~. -lgAphDen)			Model:
								stdmaTA 1 458.41	AIC lower when dropped								cbind(nSpipos, nSpineg) ~ lgAphDen + lgAervi + lgLeafHop + lgCoccin +									npar AIC			---						Ppandora 1 267.83			Addser2: fField) + lag1.Aervi + lglag1Aervi + lag1.stdmaVap						> anova(OriRickMod, OriRick1)			cbind(nRickpos, nRickneg) ~ lgLeafHop + (1 | fField) + lag1.stdmaTA +
								stdmaVap 1 467.48									Psurv + Paervi + Ppandora + (1 | fField)									<none> 332.87			Signif. codes: 0 ‘***’ 0.001 ‘**’ 0.01 ‘*’ 0.05 ‘.’ 0.1 ‘ ’ 1									Addser1: cbind(nSerpos, nSerneg) ~ lgLeafHop + lgCoccin + Ppandora + (1 |						Data: DataforGlm			lag1.Ppandora
								lgWingAph 1 457.82	AIC lower when dropped								npar AIC									stdmaVap 1 333.10	Try to drop this								> OriSer2 <- update(OriSer1, .~. -Paervi)			Addser1: fField) + lag1.Aervi + lglag1Aervi + lag1.stdmaTA + lag1.stdmaVap						Models:			npar AIC
								lgAphDen 1 466.81									<none> 220.17									lgWingAph 1 334.16			Correlation of Fixed Effects:						> anova(OriSer1, OriSer2)			npar AIC BIC logLik deviance Chisq Df Pr(>Chisq)						OriRick1: cbind(nRickpos, nRickneg) ~ stdmaTA + stdmaVap + lgWingAph +			<none> 279.82
								lgCoccin 1 458.11	AIC lower when dropped								lgAphDen 1 233.86									lgAphDen 1 334.76			(Intr) lgAphD lgLfHp						Data: DataforGlm			Addser2 8 192.89 210.04 -88.446 176.89						OriRick1: lgAervi + lgLeafHop + lgCoccin + Psurv + Paervi + Ppandora +			lgLeafHop 1 286.50
								Psurv 1 469.92									lgAervi 1 222.47									lgLeafHop 1 347.60			lgAphDen -0.773						Models:			Addser1 9 194.85 214.14 -88.425 176.85 0.0433 1 0.8351						OriRick1: (1 | fField)			lag1.stdmaTA 1 283.50
								Paervi 1 458.13	AIC lower when dropped								lgLeafHop 1 218.49	AIC lower when dropped								Ppandora 1 345.90			lgLeafHop -0.688 0.176						OriSer2: cbind(nSerpos, nSerneg) ~ stdmaTA + lgWingAph + lgAphDen + lgAervi +			> drop1(Addser2)						OriRickMod: cbind(nRickpos, nRickneg) ~ stdmaTA + stdmaVap + lgWingAph +			lag1.Ppandora 1 281.62
								Ppandora 1 457.50	Lowest AIC when dropped								lgCoccin 1 235.62												Ppandora -0.516 -0.036 0.728						OriSer2: lgLeafHop + lgCoccin + Psurv + Ppandora + (1 | fField)			Single term deletions						OriRickMod: lgAphDen + lgAervi + lgLeafHop + lgCoccin + Psurv + Paervi +			> summary(AddRick2)
																	Psurv 1 218.82	AIC lower when dropped								> RedOReg3 <- update(RedOReg2, .~. -stdmaVap)			convergence code: 0						OriSer1: cbind(nSerpos, nSerneg) ~ stdmaTA + lgWingAph + lgAphDen + lgAervi +									OriRickMod: Ppandora + (1 | fField)			Generalized linear mixed model fit by maximum likelihood (Laplace Approximation) ['glmerMod']
								anova(RedRkla2, RedRkla3)									Paervi 1 220.78									> anova(RedOReg3, RedOReg2)			boundary (singular) fit: see ?isSingular						OriSer1: lgLeafHop + lgCoccin + Psurv + Paervi + Ppandora + (1 | fField)			Model:						npar AIC BIC logLik deviance Chisq Df Pr(>Chisq)			Family: binomial ( logit )
																	Ppandora 1 222.43									Data: DataforGlm									npar AIC BIC logLik deviance Chisq Df Pr(>Chisq)			cbind(nSerpos, nSerneg) ~ lgLeafHop + lgCoccin + Ppandora + (1 |						OriRick1 11 363.21 388.85 -170.61 341.21			Formula: cbind(nRickpos, nRickneg) ~ lgLeafHop + (1 | fField) + lag1.stdmaTA + lag1.Ppandora
								Data: DataforGlm																		Models:									OriSer2 10 260.25 283.55 -120.12 240.25			fField) + lag1.Aervi + lglag1Aervi + lag1.stdmaVap						OriRickMod 12 365.18 393.15 -170.59 341.18 0.0332 1 0.8554	No significant difference after dropping		Data: DataforGlm
								Models:									RedSpiro3 <- update(RedSpiro2, .~. -lgLeafHop)									RedOReg3: cbind(nRegpos, nRegneg) ~ lgWingAph + lgAphDen + lgLeafHop +									OriSer1 11 261.93 287.56 -119.96 239.93 0.3199 1 0.5716			npar AIC						> drop1(OriRick1)
								RedRkla3: cbind(nRklapos, nRklaneg) ~ stdmaTA + stdmaVap + lgWingAph +									anova(RedSpiro3, RedSpiro2)									RedOReg3: Ppandora + (1 | fField)												<none> 192.89						boundary (singular) fit: see ?isSingular			AIC BIC logLik deviance df.resid
								RedRkla3: lgAphDen + lgCoccin + Psurv + Paervi + (1 | fField)									Data: DataforGlm									RedOReg2: cbind(nRegpos, nRegneg) ~ stdmaVap + lgWingAph + lgAphDen + lgLeafHop +									> drop1(OriSer2)			lgLeafHop 1 191.57						Single term deletions			279.8 290.5 -134.9 269.8 58
								RedRkla2: cbind(nRklapos, nRklaneg) ~ stdmaTA + stdmaVap + lgWingAph +									Models:									RedOReg2: Ppandora + (1 | fField)									Single term deletions			lgCoccin 1 198.69
								RedRkla2: lgAphDen + lgCoccin + Psurv + Paervi + Ppandora + (1 | fField)									RedSpiro3: cbind(nSpipos, nSpineg) ~ lgAphDen + lgAervi + lgCoccin + Psurv +									npar AIC BIC logLik deviance Chisq Df												Ppandora 1 208.98						Model:			Scaled residuals:
								npar AIC BIC logLik deviance Chisq Df Pr(>Chisq)									RedSpiro3: Paervi + Ppandora + (1 | fField)									RedOReg3 6 333.10 347.09 -160.55 321.10									Model:			lag1.Aervi 1 190.91						cbind(nRickpos, nRickneg) ~ stdmaTA + stdmaVap + lgWingAph +			Min 1Q Median 3Q Max
								RedRkla3 9 457.50 478.48 -219.75 439.50	AIC is lower but model is not significantly better								RedSpiro2: cbind(nSpipos, nSpineg) ~ lgAphDen + lgAervi + lgLeafHop + lgCoccin +									RedOReg2 7 332.87 349.19 -159.44 318.87 2.2303 1	No significant difference after dropping								cbind(nSerpos, nSerneg) ~ stdmaTA + lgWingAph + lgAphDen + lgAervi +			lglag1Aervi 1 194.20						lgAervi + lgLeafHop + lgCoccin + Psurv + Paervi + Ppandora +			-1.90590 -0.73235 -0.09023 0.78983 2.67217
								RedRkla2 10 459.42 482.73 -219.71 439.42 0.0806 1 0.7765									RedSpiro2: Psurv + Paervi + Ppandora + (1 | fField)									Pr(>Chisq)									lgLeafHop + lgCoccin + Psurv + Ppandora + (1 | fField)			lag1.stdmaVap 1 198.94						(1 | fField)
																	npar AIC BIC logLik deviance Chisq Df Pr(>Chisq)									RedOReg3									npar AIC			> Addser3 <- update(Addser2, .~. -lag1.Aervi)						npar AIC			Random effects:
								drop1(RedRkla3)									RedSpiro3 8 218.49 237.13 -101.24 202.49	AIC is lower but no significant difference between the models								RedOReg2 0.1353									<none> 260.25			> anova(Addser2, Addser3)						<none> 363.21			Groups Name Variance Std.Dev.
																	RedSpiro2 9 220.17 241.15 -101.08 202.17 0.3141 1 0.5752																		stdmaTA 1 262.46			Data: DataforGlm						stdmaTA 1 362.33	Lower AIC when dropped		fField (Intercept) 0.01463 0.1209
								Single term deletions																		> drop1(RedOReg3)									lgWingAph 1 260.64			Models:						stdmaVap 1 361.71	Lower AIC when dropped		Number of obs: 63, groups: fField, 6
																	drop1(RedSpiro3)									Single term deletions									lgAphDen 1 260.49			Addser3: cbind(nSerpos, nSerneg) ~ lgLeafHop + lgCoccin + Ppandora + (1 |						lgWingAph 1 361.46	Lower AIC when dropped
								Model:									Single term deletions																		lgAervi 1 259.16	Lowest AIC when dropped		Addser3: fField) + lglag1Aervi + lag1.stdmaVap						lgAervi 1 362.97	Lower AIC when dropped		Fixed effects:
								cbind(nRklapos, nRklaneg) ~ stdmaTA + stdmaVap + lgWingAph +																		Model:									lgLeafHop 1 267.14			Addser2: cbind(nSerpos, nSerneg) ~ lgLeafHop + lgCoccin + Ppandora + (1 |						lgLeafHop 1 364.78			Estimate Std. Error z value Pr(>|z|)
								lgAphDen + lgCoccin + Psurv + Paervi + (1 | fField)									Model:									cbind(nRegpos, nRegneg) ~ lgWingAph + lgAphDen + lgLeafHop +									lgCoccin 1 265.18			Addser2: fField) + lag1.Aervi + lglag1Aervi + lag1.stdmaVap						lgCoccin 1 361.37	Lower AIC when dropped		(Intercept) -1.40663 0.13764 -10.220 < 2e-16 ***
								npar AIC									cbind(nSpipos, nSpineg) ~ lgAphDen + lgAervi + lgCoccin + Psurv +									Ppandora + (1 | fField)									Psurv 1 260.43			npar AIC BIC logLik deviance Chisq Df Pr(>Chisq)						Psurv 1 361.31	Lower AIC when dropped		lgLeafHop -0.25609 0.08724 -2.936 0.00333 **
								<none> 457.50									Paervi + Ppandora + (1 | fField)									npar AIC									Ppandora 1 268.90			Addser3 7 190.91 205.92 -88.457 176.91						Paervi 1 362.42	Lower AIC when dropped		lag1.stdmaTA 0.22149 0.09352 2.368 0.01787 *
								stdmaTA 1 457.08									npar AIC									<none> 333.10												Addser2 8 192.89 210.04 -88.446 176.89 0.0216 1 0.8832						Ppandora 1 361.75	Lower AIC when dropped		lag1.Ppandora 0.81920 0.41735 1.963 0.04966 *
								stdmaVap 1 465.49	AIC lower when dropped								<none> 218.49									lgWingAph 1 333.10	Try to drop this								> OriSer3 <- update(OriSer2, .~. -lgAervi)			> drop1(Addser3)						> OriRick2 <- update(OriRick1, .~. -Psurv)			---
								lgWingAph 1 456.13	Tied lowest AIC when dropped								lgAphDen 1 232.24									lgAphDen 1 335.30									> anova(OriSer3, OriSer2)			Single term deletions						> anova(OriRick2, OriRick1)			Signif. codes: 0 ‘***’ 0.001 ‘**’ 0.01 ‘*’ 0.05 ‘.’ 0.1 ‘ ’ 1
								lgAphDen 1 465.45	AIC lower when dropped								lgAervi 1 221.75									lgLeafHop 1 346.09									Data: DataforGlm									Data: DataforGlm
								lgCoccin 1 456.13	Tied lowest AIC when dropped								lgCoccin 1 233.94									Ppandora 1 356.02									Models:			Model:						Models:			Correlation of Fixed Effects:
								Psurv 1 470.46									Psurv 1 216.88	AIC lower when dropped																	OriSer3: cbind(nSerpos, nSerneg) ~ stdmaTA + lgWingAph + lgAphDen + lgLeafHop +			cbind(nSerpos, nSerneg) ~ lgLeafHop + lgCoccin + Ppandora + (1 |						OriRick2: cbind(nRickpos, nRickneg) ~ stdmaTA + stdmaVap + lgWingAph +			(Intr) lgLfHp lg1.TA
								Paervi 1 456.28	AIC lower when dropped								Paervi 1 219.19									> RedOReg4 <- update(RedOReg3, .~. -lgWingAph)									OriSer3: lgCoccin + Psurv + Ppandora + (1 | fField)			fField) + lglag1Aervi + lag1.stdmaVap						OriRick2: lgAervi + lgLeafHop + lgCoccin + Paervi + Ppandora + (1 |			lgLeafHop -0.653
																	Ppandora 1 220.80									Data: DataforGlm									OriSer2: cbind(nSerpos, nSerneg) ~ stdmaTA + lgWingAph + lgAphDen + lgAervi +			npar AIC						OriRick2: fField)			lag1.stdmTA -0.023 -0.294
								RedRkla4 <- update(RedRkla3, .~. -lgWingAph -lgCoccin)																		Models:									OriSer2: lgLeafHop + lgCoccin + Psurv + Ppandora + (1 | fField)			<none> 190.91						OriRick1: cbind(nRickpos, nRickneg) ~ stdmaTA + stdmaVap + lgWingAph +			lag1.Ppandr -0.544 0.204 0.442
																	RedSpiro4 <- update(RedSpiro3, .~. -Psurv)									RedOReg4: cbind(nRegpos, nRegneg) ~ lgAphDen + lgLeafHop + Ppandora + (1 |									npar AIC BIC logLik deviance Chisq Df Pr(>Chisq)			lgLeafHop 1 189.78						OriRick1: lgAervi + lgLeafHop + lgCoccin + Psurv + Paervi + Ppandora +
								anova(RedRkla4, RedRkla3)									anova(RedSpiro4, RedSpiro3)									RedOReg4: fField)									OriSer3 9 259.16 280.13 -120.58 241.16			lgCoccin 1 196.69						OriRick1: (1 | fField)
																	Data: DataforGlm									RedOReg3: cbind(nRegpos, nRegneg) ~ lgWingAph + lgAphDen + lgLeafHop +									OriSer2 10 260.25 283.55 -120.12 240.25 0.9101 1 0.3401			Ppandora 1 212.48						npar AIC BIC logLik deviance Chisq Df Pr(>Chisq)
								Data: DataforGlm									Models:									RedOReg3: Ppandora + (1 | fField)												lglag1Aervi 1 196.60						OriRick2 10 361.31 384.61 -170.65 341.31
								Models:									RedSpiro4: cbind(nSpipos, nSpineg) ~ lgAphDen + lgAervi + lgCoccin + Paervi +									npar AIC BIC logLik deviance Chisq Df Pr(>Chisq)									> drop1(OriSer3)			lag1.stdmaVap 1 196.94						OriRick1 11 363.21 388.85 -170.61 341.21 0.0914 1 0.7624	No significant difference after dropping
								RedRkla4: cbind(nRklapos, nRklaneg) ~ stdmaTA + stdmaVap + lgAphDen + Psurv +									RedSpiro4: Ppandora + (1 | fField)									RedOReg4 5 333.1 344.75 -161.55 323.1									Single term deletions			> Addser4 <- update(Addser3, .~. -lgLeafHop)						> drop1(OriRick2)
								RedRkla4: Paervi + (1 | fField)									RedSpiro3: cbind(nSpipos, nSpineg) ~ lgAphDen + lgAervi + lgCoccin + Psurv +									RedOReg3 6 333.1 347.09 -160.55 321.1 1.9938 1 0.1579	No significant diffference after dropping											> anova(Addser4, Addser3)						Single term deletions
								RedRkla3: cbind(nRklapos, nRklaneg) ~ stdmaTA + stdmaVap + lgWingAph +									RedSpiro3: Paervi + Ppandora + (1 | fField)																		Model:			Data: DataforGlm
								RedRkla3: lgAphDen + lgCoccin + Psurv + Paervi + (1 | fField)									npar AIC BIC logLik deviance Chisq Df Pr(>Chisq)									> drop1(RedOReg4)									cbind(nSerpos, nSerneg) ~ stdmaTA + lgWingAph + lgAphDen + lgLeafHop +			Models:						Model:
								npar AIC BIC logLik deviance Chisq Df Pr(>Chisq)									RedSpiro4 7 216.88 233.19 -101.44 202.88	AIC is lower but no significant difference between the models								Single term deletions									lgCoccin + Psurv + Ppandora + (1 | fField)			Addser4: cbind(nSerpos, nSerneg) ~ lgCoccin + Ppandora + (1 | fField) +						cbind(nRickpos, nRickneg) ~ stdmaTA + stdmaVap + lgWingAph +
								RedRkla4 7 455.27 471.59 -220.64 441.27	AIC lower but model not significantly better								RedSpiro3 8 218.49 237.13 -101.24 202.49 0.3903 1 0.5321																		npar AIC			Addser4: lglag1Aervi + lag1.stdmaVap						lgAervi + lgLeafHop + lgCoccin + Paervi + Ppandora + (1 |
								RedRkla3 9 457.50 478.48 -219.75 439.50 1.7702 2 0.4127																		Model:									<none> 259.16			Addser3: cbind(nSerpos, nSerneg) ~ lgLeafHop + lgCoccin + Ppandora + (1 |						fField)
																	drop1(RedSpiro4)									cbind(nRegpos, nRegneg) ~ lgAphDen + lgLeafHop + Ppandora + (1 |									stdmaTA 1 263.40			Addser3: fField) + lglag1Aervi + lag1.stdmaVap						npar AIC
								drop1(RedRkla4)									Single term deletions									fField)									lgWingAph 1 259.67			npar AIC BIC logLik deviance Chisq Df Pr(>Chisq)						<none> 361.31
								Single term deletions																		npar AIC									lgAphDen 1 259.06			Addser4 6 189.78 202.63 -88.888 177.78						stdmaTA 1 360.37	Lower AIC when dropped
																	Model:									<none> 333.10									lgLeafHop 1 265.72			Addser3 7 190.91 205.92 -88.457 176.91 0.861 1 0.3535						stdmaVap 1 359.82	Lower AIC when dropped
								Model:									cbind(nSpipos, nSpineg) ~ lgAphDen + lgAervi + lgCoccin + Paervi +									lgAphDen 1 335.70	Couldn't drop anymore								lgCoccin 1 264.13			> drop1(Addser4)						lgWingAph 1 359.54	Lower AIC when dropped
								cbind(nRklapos, nRklaneg) ~ stdmaTA + stdmaVap + lgAphDen + Psurv +									Ppandora + (1 | fField)									lgLeafHop 1 347.13									Psurv 1 258.64	Lowest AIC when dropped		Single term deletions						lgAervi 1 360.97	Lower AIC when dropped
								Paervi + (1 | fField)									npar AIC									Ppandora 1 360.60									Ppandora 1 273.14									lgLeafHop 1 363.69
								npar AIC									<none> 216.88																					Model:						lgCoccin 1 359.43	Lower AIC when dropped
								<none> 455.27									lgAphDen 1 231.34									> summary(RedOReg4)	This is the final model								> OriSer4 <- update(OriSer3, .~. -Psurv)			cbind(nSerpos, nSerneg) ~ lgCoccin + Ppandora + (1 | fField) +						Paervi 1 360.42	Lower AIC when dropped
								stdmaTA 1 454.67	AIC lower when dropped								lgAervi 1 219.77									Generalized linear mixed model fit by maximum likelihood (Laplace Approximation) [									> anova(OriSer3, OriSer4)			lglag1Aervi + lag1.stdmaVap						Ppandora 1 360.25	Lower AIC when dropped
								stdmaVap 1 463.20									lgCoccin 1 232.59									glmerMod]									Data: DataforGlm			npar AIC						> OriRick3 <- update(OriRick2, .~. -lgCoccin)
								lgAphDen 1 464.68									Paervi 1 219.53									Family: binomial ( logit )									Models:			<none> 189.78						> anova(OriRick2, OriRick3)
								Psurv 1 467.13									Ppandora 1 227.43									Formula: cbind(nRegpos, nRegneg) ~ lgAphDen + lgLeafHop + Ppandora + (1 | fField)									OriSer4: cbind(nSerpos, nSerneg) ~ stdmaTA + lgWingAph + lgAphDen + lgLeafHop +			lgCoccin 1 195.89						Data: DataforGlm
								Paervi 1 454.04	Lowest AIC when dropping								Removing anything would increase AIC by at least 3									Data: DataforGlm									OriSer4: lgCoccin + Ppandora + (1 | fField)			Ppandora 1 237.41						Models:
																	Is this model better than the original model?																		OriSer3: cbind(nSerpos, nSerneg) ~ stdmaTA + lgWingAph + lgAphDen + lgLeafHop +			lglag1Aervi 1 195.24						OriRick3: cbind(nRickpos, nRickneg) ~ stdmaTA + stdmaVap + lgWingAph +
								RedRkla5 <- update(RedRkla4, .~. -Paervi)																		AIC BIC logLik deviance df.resid									OriSer3: lgCoccin + Psurv + Ppandora + (1 | fField)			lag1.stdmaVap 1 195.09						OriRick3: lgAervi + lgLeafHop + Paervi + Ppandora + (1 | fField)
																	anova(RedSpiro4, FullSpiroMod)									333.1 344.8 -161.5 323.1 71									npar AIC BIC logLik deviance Chisq Df Pr(>Chisq)			> summary(Addser4)						OriRick2: cbind(nRickpos, nRickneg) ~ stdmaTA + stdmaVap + lgWingAph +
								anova(RedRkla5, RedRkla4)									Data: DataforGlm																		OriSer4 8 258.64 277.29 -121.32 242.64			Generalized linear mixed model fit by maximum likelihood (Laplace Approximation) ['glmerMod']						OriRick2: lgAervi + lgLeafHop + lgCoccin + Paervi + Ppandora + (1 |
																	Models:									Scaled residuals:									OriSer3 9 259.16 280.13 -120.58 241.16 1.4878 1 0.2226			Family: binomial ( logit )						OriRick2: fField)
								Data: DataforGlm									RedSpiro4: cbind(nSpipos, nSpineg) ~ lgAphDen + lgAervi + lgCoccin + Paervi +									Min 1Q Median 3Q Max												Formula: cbind(nSerpos, nSerneg) ~ lgCoccin + Ppandora + (1 | fField) + lglag1Aervi + lag1.stdmaVap						npar AIC BIC logLik deviance Chisq Df Pr(>Chisq)
								Models:									RedSpiro4: Ppandora + (1 | fField)									-3.0280 -0.8737 -0.1377 0.8056 3.0137									> drop1(OriSer4)			Data: DataforGlm						OriRick3 9 359.43 380.41 -170.72 341.43
								RedRkla5: cbind(nRklapos, nRklaneg) ~ stdmaTA + stdmaVap + lgAphDen + Psurv +									FullSpiroMod: cbind(nSpipos, nSpineg) ~ stdmaTA + stdmaVap + lgWingAph + lgAphDen +																		Single term deletions									OriRick2 10 361.31 384.61 -170.65 341.31 0.1282 1 0.7203	No significant difference after dropping
								RedRkla5: (1 | fField)									FullSpiroMod: lgAervi + lgLeafHop + lgCoccin + Psurv + Paervi + Ppandora +									Random effects:												AIC BIC logLik deviance df.resid						> drop1(OriRick3)
								RedRkla4: cbind(nRklapos, nRklaneg) ~ stdmaTA + stdmaVap + lgAphDen + Psurv +									FullSpiroMod: (1 | fField)									Groups Name Variance Std.Dev.									Model:			189.8 202.6 -88.9 177.8 57						Single term deletions
								RedRkla4: Paervi + (1 | fField)									npar AIC BIC logLik deviance Chisq Df Pr(>Chisq)									fField (Intercept) 0 0									cbind(nSerpos, nSerneg) ~ stdmaTA + lgWingAph + lgAphDen + lgLeafHop +
								npar AIC BIC logLik deviance Chisq Df Pr(>Chisq)									RedSpiro4 7 216.88 233.19 -101.44 202.88	AIC of reduced model is much lower, so a better model								Number of obs: 76, groups: fField, 6									lgCoccin + Ppandora + (1 | fField)			Scaled residuals:						Model:
								RedRkla5 6 454.04 468.02 -221.02 442.04	AIC lower but model not significantly better								FullSpiroMod 12 225.96 253.92 -100.98 201.96 0.9198 5 0.9688																		npar AIC			Min 1Q Median 3Q Max						cbind(nRickpos, nRickneg) ~ stdmaTA + stdmaVap + lgWingAph +
								RedRkla4 7 455.27 471.59 -220.64 441.27 0.7642 1 0.382																		Fixed effects:									<none> 258.64			-1.7385 -0.8179 -0.2685 0.5954 2.5820						lgAervi + lgLeafHop + Paervi + Ppandora + (1 | fField)
																	summary(RedSpiro4)									Estimate Std. Error z value Pr(>|z|)									stdmaTA 1 261.41									npar AIC
								drop1(RedRkla5)									Generalized linear mixed model fit by maximum likelihood (Laplace Approximation) ['glmerMod']									(Intercept) -2.68267 0.26804 -10.009 < 2e-16 ***									lgWingAph 1 259.08			Random effects:						<none> 359.43
								Single term deletions									Family: binomial ( logit )									lgAphDen 0.23662 0.11165 2.119 0.0341 *									lgAphDen 1 258.59	Lowest AIC when dropped		Groups Name Variance Std.Dev.						stdmaTA 1 358.46	Lower AIC when dropped
																	Formula: cbind(nSpipos, nSpineg) ~ lgAphDen + lgAervi + lgCoccin + Paervi + Ppandora + (1 | fField)									lgLeafHop 0.32962 0.08362 3.942 8.08e-05 ***									lgLeafHop 1 268.20			fField (Intercept) 0.03519 0.1876						stdmaVap 1 357.97	Lower AIC when dropped
								Model:									Data: DataforGlm									Ppandora 1.76821 0.32237 5.485 4.13e-08 ***									lgCoccin 1 263.71			Number of obs: 63, groups: fField, 6						lgWingAph 1 357.72	Lower AIC when dropped
								cbind(nRklapos, nRklaneg) ~ stdmaTA + stdmaVap + lgAphDen + Psurv +																		---									Ppandora 1 274.86									lgAervi 1 359.11	Lower AIC when dropped
								(1 | fField)									AIC BIC logLik deviance df.resid									Signif. codes: 0 ‘***’ 0.001 ‘**’ 0.01 ‘*’ 0.05 ‘.’ 0.1 ‘ ’ 1												Fixed effects:						lgLeafHop 1 361.73
								npar AIC									216.9 233.2 -101.4 202.9 69																		> OriSer5 <- update(OriSer4, .~. -lgAphDen)			Estimate Std. Error z value Pr(>|z|)						Paervi 1 358.48	Lower AIC when dropped
								<none> 454.04																		Correlation of Fixed Effects:									> anova(OriSer5, OriSer4)			(Intercept) -3.4085 0.1979 -17.221 < 2e-16 ***						Ppandora 1 358.40	Lower AIC when dropped
								stdmaTA 1 454.54									Scaled residuals:									(Intr) lgAphD lgLfHp									Data: DataforGlm			lgCoccin -0.6092 0.2063 -2.953 0.00315 **						> OriRick4 <- update(OriRick3, .~. -lgWingAph)
								stdmaVap 1 461.58									Min 1Q Median 3Q Max									lgAphDen -0.872									Models:			Ppandora 3.2821 0.4731 6.938 3.98e-12 ***						> anova(OriRick4, OriRick3)
								lgAphDen 1 463.76									-1.3671 -0.8826 -0.4254 0.8160 6.0537									lgLeafHop -0.691 0.393									OriSer5: cbind(nSerpos, nSerneg) ~ stdmaTA + lgWingAph + lgLeafHop + lgCoccin +			lglag1Aervi -0.4387 0.1645 -2.667 0.00766 **						Data: DataforGlm
								Psurv 1 465.82																		Ppandora -0.466 0.115 0.559									OriSer5: Ppandora + (1 | fField)			lag1.stdmaVap 0.3587 0.1282 2.798 0.00515 **						Models:
																	Random effects:									convergence code: 0									OriSer4: cbind(nSerpos, nSerneg) ~ stdmaTA + lgWingAph + lgAphDen + lgLeafHop +			---						OriRick4: cbind(nRickpos, nRickneg) ~ stdmaTA + stdmaVap + lgAervi + lgLeafHop +
								anova(FullRklaMod, RedRkla5)									Groups Name Variance Std.Dev.									boundary (singular) fit: see ?isSingular									OriSer4: lgCoccin + Ppandora + (1 | fField)			Signif. codes: 0 ‘***’ 0.001 ‘**’ 0.01 ‘*’ 0.05 ‘.’ 0.1 ‘ ’ 1						OriRick4: Paervi + Ppandora + (1 | fField)
								Data: DataforGlm									fField (Intercept) 0 0																		npar AIC BIC logLik deviance Chisq Df Pr(>Chisq)									OriRick3: cbind(nRickpos, nRickneg) ~ stdmaTA + stdmaVap + lgWingAph +
								Models:									Number of obs: 76, groups: fField, 6																		OriSer5 7 258.59 274.90 -122.29 244.59			Correlation of Fixed Effects:						OriRick3: lgAervi + lgLeafHop + Paervi + Ppandora + (1 | fField)
								RedRkla5: cbind(nRklapos, nRklaneg) ~ stdmaTA + stdmaVap + lgAphDen + Psurv +																											OriSer4 8 258.64 277.29 -121.32 242.64 1.9427 1 0.1634			(Intr) lgCccn Ppandr lglg1A						npar AIC BIC logLik deviance Chisq Df Pr(>Chisq)
								RedRkla5: (1 | fField)									Fixed effects:																					lgCoccin 0.157						OriRick4 8 357.72 376.36 -170.86 341.72
								FullRklaMod: cbind(nRklapos, nRklaneg) ~ stdmaTA + stdmaVap + lgWingAph +									Estimate Std. Error z value Pr(>|z|)																		> drop1(OriSer5)			Ppandora -0.704 -0.073						OriRick3 9 359.43 380.41 -170.72 341.43 0.2832 1 0.5946	No significant difference after dropping
								FullRklaMod: lgAphDen + lgAervi + lgLeafHop + lgCoccin + Psurv + Paervi +									(Intercept) -5.0718 0.4726 -10.733 < 2e-16 ***																		Single term deletions			lglag1Aervi 0.153 0.106 -0.345						> drop1(OriRick4)
								FullRklaMod: Ppandora + (1 | fField)									lgAphDen 0.7999 0.2033 3.934 8.34e-05 ***	Aphid denisty is significant																				lag1.stdmVp -0.393 -0.211 0.532 -0.138						Single term deletions
								npar AIC BIC logLik deviance Chisq Df Pr(>Chisq)									lgAervi -0.4758 0.2173 -2.190 0.028518 *	Count of a Aervi is significant																	Model:
								RedRkla5 6 454.04 468.02 -221.02 442.04									lgCoccin 1.0285 0.2573 3.997 6.41e-05 ***	Count of ladybugs is significant																	cbind(nSerpos, nSerneg) ~ stdmaTA + lgWingAph + lgLeafHop + lgCoccin +									Model:
								FullRklaMod 12 463.33 491.30 -219.67 439.33 2.7036 6 0.845	AIC lower but model not significantly better								Paervi 1.8833 0.8617 2.186 0.028840 *	Death due to Aervi is singificant																	Ppandora + (1 | fField)									cbind(nRickpos, nRickneg) ~ stdmaTA + stdmaVap + lgAervi + lgLeafHop +
																	Ppandora 2.0677 0.5807 3.561 0.000369 ***	Death due to pandora is significant																	npar AIC									Paervi + Ppandora + (1 | fField)
								Does adding our apriori expected predictor (Ppandora) improve the model?									---																		<none> 258.59									npar AIC
																	Signif. codes: 0 ‘***’ 0.001 ‘**’ 0.01 ‘*’ 0.05 ‘.’ 0.1 ‘ ’ 1																		stdmaTA 1 259.90									<none> 357.72
								RklaAPan <- update(RedRkla5, .~. +Ppandora)																											lgWingAph 1 258.30	Lower AIC when dropped								stdmaTA 1 357.18	Lower AIC when dropped
																	Correlation of Fixed Effects:																		lgLeafHop 1 269.89									stdmaVap 1 356.18	Lower AIC when dropped
								anova(RedRkla5, RklaAPan)									(Intr) lgAphD lgAerv lgCccn Paervi																		lgCoccin 1 261.91									lgAervi 1 357.33	Lower AIC when dropped
																	lgAphDen -0.863																		Ppandora 1 272.90									lgLeafHop 1 361.01
								Data: DataforGlm									lgAervi 0.576 -0.394																											Paervi 1 356.76	Lower AIC when dropped
								Models:									lgCoccin -0.142 -0.078 -0.095																		> OriSer6 <- update(OriSer5, .~. -lgWingAph)									Ppandora 1 357.23	Lower AIC when dropped
								RedRkla5: cbind(nRklapos, nRklaneg) ~ stdmaTA + stdmaVap + lgAphDen + Psurv +									Paervi -0.438 0.058 -0.717 0.243																		> anova(OriSer5, OriSer6)									> OriRick5 <- update(OriRick4, .~. -stdmaVap)
								RedRkla5: (1 | fField)									Ppandora -0.461 0.074 -0.555 0.213 0.665																		Data: DataforGlm									> anova(OriRick4, OriRick5)
								RklaAPan: cbind(nRklapos, nRklaneg) ~ stdmaTA + stdmaVap + lgAphDen + Psurv +									optimizer (Nelder_Mead) convergence code: 0 (OK)																		Models:									Data: DataforGlm
								RklaAPan: (1 | fField) + Ppandora									boundary (singular) fit: see ?isSingular																		OriSer6: cbind(nSerpos, nSerneg) ~ stdmaTA + lgLeafHop + lgCoccin + Ppandora +									Models:
								npar AIC BIC logLik deviance Chisq Df Pr(>Chisq)																											OriSer6: (1 | fField)									OriRick5: cbind(nRickpos, nRickneg) ~ stdmaTA + lgAervi + lgLeafHop + Paervi +
								RedRkla5 6 454.04 468.02 -221.02 442.04	AIC higher when adding Pandora, can't add back in																										OriSer5: cbind(nSerpos, nSerneg) ~ stdmaTA + lgWingAph + lgLeafHop + lgCoccin +									OriRick5: Ppandora + (1 | fField)
								RklaAPan 7 455.93 472.24 -220.97 441.93 0.1082 1 0.7421																											OriSer5: Ppandora + (1 | fField)									OriRick4: cbind(nRickpos, nRickneg) ~ stdmaTA + stdmaVap + lgAervi + lgLeafHop +
																																			npar AIC BIC logLik deviance Chisq Df Pr(>Chisq)									OriRick4: Paervi + Ppandora + (1 | fField)
								summary(RedRkla5)																											OriSer6 6 258.30 272.29 -123.15 246.30									npar AIC BIC logLik deviance Chisq Df Pr(>Chisq)
								Generalized linear mixed model fit by maximum likelihood (Laplace Approximation) ['glmerMod']																											OriSer5 7 258.59 274.90 -122.29 244.59 1.7171 1 0.1901	No significant difference after dropping								OriRick5 7 356.18 372.50 -171.09 342.18
								Family: binomial ( logit )																																				OriRick4 8 357.72 376.36 -170.86 341.72 0.4626 1 0.4964	No significant difference after dropping
								Formula: cbind(nRklapos, nRklaneg) ~ stdmaTA + stdmaVap + lgAphDen + Psurv + (1 | fField)																											> drop1(OriSer6)									> drop1(OriRick5)
								Data: DataforGlm																											Single term deletions									Single term deletions
								AIC BIC logLik deviance df.resid																											Model:									Model:
								454 468 -221 442 70																											cbind(nSerpos, nSerneg) ~ stdmaTA + lgLeafHop + lgCoccin + Ppandora +									cbind(nRickpos, nRickneg) ~ stdmaTA + lgAervi + lgLeafHop + Paervi +
																																			(1 | fField)									Ppandora + (1 | fField)
								Scaled residuals:																											npar AIC									npar AIC
								Min 1Q Median 3Q Max																											<none> 258.30									<none> 356.18
								-2.8002 -1.4837 -0.4812 1.2818 5.3681																											stdmaTA 1 258.40	Try to drop this								stdmaTA 1 355.19	Lower AIC when dropped
																																			lgLeafHop 1 268.25									lgAervi 1 357.49	Lower AIC when dropped
								Random effects:																											lgCoccin 1 260.73									lgLeafHop 1 359.57
								Groups Name Variance Std.Dev.																											Ppandora 1 271.57									Paervi 1 355.77	Lower AIC when dropped
								fField (Intercept) 0.0364 0.1908																																				Ppandora 1 355.51	Lower AIC when dropped
								Number of obs: 76, groups: fField, 6																											> OriSer8 <- update(OriSer6, .~. -stdmaTA)									> anova(OriRick6, OriRick5)
																																			> anova(OriSer6, OriSer8)									Data: DataforGlm
								Fixed effects:																											Data: DataforGlm									Models:
								Estimate Std. Error z value Pr(>|z|)																											Models:									OriRick6: cbind(nRickpos, nRickneg) ~ lgAervi + lgLeafHop + Paervi + Ppandora +
								(Intercept) -2.97349 0.29774 -9.987 < 2e-16 ***																											OriSer8: cbind(nSerpos, nSerneg) ~ lgLeafHop + lgCoccin + Ppandora + (1 |									OriRick6: (1 | fField)
								stdmaTA -0.22318 0.14114 -1.581 0.113811	Temperature not significant to model																										OriSer8: fField)									OriRick5: cbind(nRickpos, nRickneg) ~ stdmaTA + lgAervi + lgLeafHop + Paervi +
								stdmaVap -0.26612 0.08785 -3.029 0.002452 **	Vapor significant																										OriSer6: cbind(nSerpos, nSerneg) ~ stdmaTA + lgLeafHop + lgCoccin + Ppandora +									OriRick5: Ppandora + (1 | fField)
								lgAphDen 0.35846 0.10605 3.380 0.000724 ***	Aphid densitiy significant																										OriSer6: (1 | fField)									npar AIC BIC logLik deviance Chisq Df Pr(>Chisq)
								Psurv 1.52812 0.41131 3.715 0.000203 ***	Survival significant																										npar AIC BIC logLik deviance Chisq Df Pr(>Chisq)									OriRick6 6 355.19 369.17 -171.59 343.19
								---																											OriSer8 5 258.4 270.06 -124.20 248.4									OriRick5 7 356.18 372.50 -171.09 342.18 1.0064 1 0.3158	No significant difference after dropping
								Signif. codes: 0 ‘***’ 0.001 ‘**’ 0.01 ‘*’ 0.05 ‘.’ 0.1 ‘ ’ 1																											OriSer6 6 258.3 272.29 -123.15 246.3 2.0981 1 0.1475	No significant difference after dropping								> drop1(OriRick6)
																																												boundary (singular) fit: see ?isSingular
								Correlation of Fixed Effects:																											> drop1(OriSer8)									Single term deletions
								(Intr) stdmTA stdmVp lgAphD																											Single term deletions
								stdmaTA 0.392																																				Model:
								stdmaVap -0.030 -0.481																											Model:									cbind(nRickpos, nRickneg) ~ lgAervi + lgLeafHop + Paervi + Ppandora +
								lgAphDen -0.638 0.255 -0.136																											cbind(nSerpos, nSerneg) ~ lgLeafHop + lgCoccin + Ppandora + (1 |									(1 | fField)
								Psurv -0.685 -0.796 0.206 -0.005																											fField)									npar AIC
																																			npar AIC									<none> 355.19
								Can we drop temperature?																											<none> 258.40									lgAervi 1 357.50
																																			lgLeafHop 1 268.89									lgLeafHop 1 357.62
								RedRkla6 <- update(RedRkla5, .~. -stdmaTA)																											lgCoccin 1 260.01	Try to drop this								Paervi 1 356.55
																																			Ppandora 1 269.69									Ppandora 1 353.65	Lower AIC when dropped
								anova(RedRkla6, RedRkla5)																																				> OriRick7 <- update(OriRick6, .~. -Ppandora)
																																			> OriSer9 <- update(OriSer8, .~. -lgCoccin)									> anova(OriRick6, OriRick7)
								Data: DataforGlm																											> anova(OriSer9, OriSer8)									Data: DataforGlm
								Models:																											Data: DataforGlm									Models:
								RedRkla6: cbind(nRklapos, nRklaneg) ~ stdmaVap + lgAphDen + Psurv + (1 |																											Models:									OriRick7: cbind(nRickpos, nRickneg) ~ lgAervi + lgLeafHop + Paervi + (1 |
								RedRkla6: fField)																											OriSer9: cbind(nSerpos, nSerneg) ~ lgLeafHop + Ppandora + (1 | fField)									OriRick7: fField)
								RedRkla5: cbind(nRklapos, nRklaneg) ~ stdmaTA + stdmaVap + lgAphDen + Psurv +																											OriSer8: cbind(nSerpos, nSerneg) ~ lgLeafHop + lgCoccin + Ppandora + (1 |									OriRick6: cbind(nRickpos, nRickneg) ~ lgAervi + lgLeafHop + Paervi + Ppandora +
								RedRkla5: (1 | fField)																											OriSer8: fField)									OriRick6: (1 | fField)
								npar AIC BIC logLik deviance Chisq Df Pr(>Chisq)																											npar AIC BIC logLik deviance Chisq Df Pr(>Chisq)									npar AIC BIC logLik deviance Chisq Df Pr(>Chisq)
								RedRkla6 5 454.54 466.20 -222.27 444.54	AIC is higher in updated model, but only by .5, and model not signifantly different																										OriSer9 4 260.01 269.33 -126.0 252.01									OriRick7 5 353.65 365.30 -171.82 343.65
								RedRkla5 6 454.04 468.02 -221.02 442.04 2.5058 1 0.1134																											OriSer8 5 258.40 270.06 -124.2 248.40 3.6054 1 0.05759 .	Model is significantly worse after dropping								OriRick6 6 355.19 369.17 -171.59 343.19 0.4589 1 0.4981	No significant difference after dropping
																																			---									> drop1(OriRick7)
								summary(RedRkla6)																											Signif. codes: 0 ‘***’ 0.001 ‘**’ 0.01 ‘*’ 0.05 ‘.’ 0.1 ‘ ’ 1									boundary (singular) fit: see ?isSingular
								Generalized linear mixed model fit by maximum likelihood (Laplace Approximation) ['glmerMod']																																				Single term deletions
								Family: binomial ( logit )																											> summary(OriSer8)	This is the final model
								Formula: cbind(nRklapos, nRklaneg) ~ stdmaVap + lgAphDen + Psurv + (1 | fField)																											Generalized linear mixed model fit by maximum likelihood (Laplace Approximation) ['glmerMod']									Model:
								Data: DataforGlm																											Family: binomial ( logit )									cbind(nRickpos, nRickneg) ~ lgAervi + lgLeafHop + Paervi + (1 |
																																			Formula: cbind(nSerpos, nSerneg) ~ lgLeafHop + lgCoccin + Ppandora + (1 | fField)									fField)
								AIC BIC logLik deviance df.resid																											Data: DataforGlm									npar AIC
								454.5 466.2 -222.3 444.5 71																																				<none> 353.65
																																			AIC BIC logLik deviance df.resid									lgAervi 1 355.50	Try to drop this
								Scaled residuals:																											258.4 270.1 -124.2 248.4 71									lgLeafHop 1 358.69
								Min 1Q Median 3Q Max																																				Paervi 1 358.66
								-2.6018 -1.4186 -0.5145 1.2864 4.8086																											Scaled residuals:									> OriRick8 <- update(OriRick7, .~. -lgAervi)
																																			Min 1Q Median 3Q Max									> anova(OriRick8, OriRick7)
								Random effects:																											-2.0731 -0.8922 -0.4472 0.6250 3.9234									Data: DataforGlm
								Groups Name Variance Std.Dev.																																				Models:
								fField (Intercept) 0.03883 0.197																											Random effects:									OriRick8: cbind(nRickpos, nRickneg) ~ lgLeafHop + Paervi + (1 | fField)
								Number of obs: 76, groups: fField, 6																											Groups Name Variance Std.Dev.									OriRick7: cbind(nRickpos, nRickneg) ~ lgAervi + lgLeafHop + Paervi + (1 |
																																			fField (Intercept) 0.04253 0.2062									OriRick7: fField)
								Fixed effects:																											Number of obs: 76, groups: fField, 6									npar AIC BIC logLik deviance Chisq Df Pr(>Chisq)
								Estimate Std. Error z value Pr(>|z|)																																				OriRick8 4 355.50 364.82 -173.75 347.50
								(Intercept) -2.79286 0.27472 -10.166 < 2e-16 ***																											Fixed effects:									OriRick7 5 353.65 365.30 -171.82 343.65 3.8516 1 0.0497 *	The model is signicantly worse after dropping
								stdmaVap -0.33461 0.07735 -4.326 1.52e-05 ***	Vapor deficit is significant																										Estimate Std. Error z value Pr(>|z|)									---
								lgAphDen 0.40121 0.10271 3.906 9.37e-05 ***	Aphid density is significant																										(Intercept) -2.6756 0.1743 -15.351 < 2e-16 ***									Signif. codes: 0 ‘***’ 0.001 ‘**’ 0.01 ‘*’ 0.05 ‘.’ 0.1 ‘ ’ 1
								Psurv 1.01093 0.24990 4.045 5.23e-05 ***	Survival is significant																										lgLeafHop -0.3763 0.1052 -3.577 0.000348 ***									> drop1(OriRick7)
								---																											lgCoccin -0.3640 0.1870 -1.947 0.051578 .									boundary (singular) fit: see ?isSingular
								Signif. codes: 0 ‘***’ 0.001 ‘**’ 0.01 ‘*’ 0.05 ‘.’ 0.1 ‘ ’ 1																											Ppandora 1.4043 0.3770 3.725 0.000196 ***									Single term deletions
																																			---
								Correlation of Fixed Effects:																											Signif. codes: 0 ‘***’ 0.001 ‘**’ 0.01 ‘*’ 0.05 ‘.’ 0.1 ‘ ’ 1									Model:
								(Intr) stdmVp lgAphD																																				cbind(nRickpos, nRickneg) ~ lgAervi + lgLeafHop + Paervi + (1 |
								stdmaVap 0.197																											Correlation of Fixed Effects:									fField)
								lgAphDen -0.827 -0.014																											(Intr) lgLfHp lgCccn									npar AIC
								Psurv -0.668 -0.334 0.335																											lgLeafHop -0.416									<none> 353.65
																																			lgCoccin 0.051 0.021									lgAervi 1 355.50
																																			Ppandora -0.608 0.348 0.050									lgLeafHop 1 358.69
																																												Paervi 1 358.66
																																												> summary(OriRick7)	This is the final model
																																												Generalized linear mixed model fit by maximum likelihood (Laplace Approximation) ['glmerMod']
																																												Family: binomial ( logit )
																																												Formula: cbind(nRickpos, nRickneg) ~ lgAervi + lgLeafHop + Paervi + (1 | fField)
																																												Data: DataforGlm
																																												AIC BIC logLik deviance df.resid
																																												353.6 365.3 -171.8 343.6 71
																																												Scaled residuals:
																																												Min 1Q Median 3Q Max
																																												-2.1178 -0.8805 -0.1488 0.8416 2.9126
																																												Random effects:
																																												Groups Name Variance Std.Dev.
																																												fField (Intercept) 0.00354 0.0595
																																												Number of obs: 76, groups: fField, 6
																																												Fixed effects:
																																												Estimate Std. Error z value Pr(>|z|)
																																												(Intercept) -1.18695 0.10071 -11.786 < 2e-16 ***
																																												lgAervi -0.22329 0.11341 -1.969 0.04897 *
																																												lgLeafHop -0.20100 0.07654 -2.626 0.00863 **
																																												Paervi -1.12356 0.43613 -2.576 0.00999 **
																																												---
																																												Signif. codes: 0 ‘***’ 0.001 ‘**’ 0.01 ‘*’ 0.05 ‘.’ 0.1 ‘ ’ 1
																																												Correlation of Fixed Effects:
																																												(Intr) lgAerv lgLfHp
																																												lgAervi -0.193
																																												lgLeafHop -0.580 0.570
																																												Paervi -0.367 -0.500 -0.144

## Sheet: Table S5-ovrwntr & htchhk stats
Table S5: Statistical analyses on symbiont data from 2012-2013 and 2013-2014 overwintering study, including datasets in which co-infections with top partners were removed (i.e. hitchhiking assessments)
			hitchhiking assessment						hitchhiking assessment						hitchhiking assessment						hitchhiking assessment						hitchhiking assessment						hitchhiking assessment						hitchhiking assessment						hitchhiking assessment
Regiella: 2012 - 2013			Regiella: 2012 - 2013 - after removing co-infections with top partner (Hamiltonella)			Regiella: 2013 -2014			Regiella: 2013-2014 - after removing co-infections with top partner (Hamiltonella)			Serratia: 2012-2013			Serratia: 2012-2013- after removing co-infections with top partner (Rickettsiella)			Serratia: 2013-2014			Serratia: 2013-2014- after removing co-infections with top partner (Rickettsiella)			Rickettsia: 2012-2013			Rickettsia: 2012-2013 - after removing co-infections with top partner (Hamiltonella)			Rickettsia: 2013-2014			Rickettsia: 2013-2014 - after removing co-infections with top partner (Hamiltonella)			Fukatsuia (X-Type): 2012-2013			2012-2013: Fukatsuia prevalence was low - especially afer removing aphids harboring co-infections with Hamiltonella. Hitchhiking assessment was, thus, not performed.			Fukatsuia (X-Type): 2013-2014			2013-2014: Fukatsuia prevalence was low - especially afer removing aphids harboring co-infections with Hamiltonella. Hitchhiking assessment was, thus, not performed.			Ricketsiella: 2012-2013
RegW1 <- glmer(cbind(Ri, RiNeg)~Time + (1|Field), family = binomial, data = OverW1)			RegCoW1 <- glmer(cbind(RegHD, RiNeg)~Period + (1|Field), family = binomial, data = CoOverW1)			RegW2 <- glmer(cbind(Ri, RiNeg)~Time + (1|Field), family = binomial, data = OverW2)			RegCoW2 <- glmer(cbind(RegHD, RiNeg)~Period + (1|Field), family = binomial, data = CoOverW2)			SerW1 <- glmer(cbind(Ss, SsNeg)~Time + (1|Field), family = binomial, data = OverW1)			SerCoW1 <- glmer(cbind(SerRkla, SsNeg)~Period + (1|Field), family = binomial, data = CoOverW1)			SerW2 <- glmer(cbind(Ss, SsNeg)~Time + (1|Field), family = binomial, data = OverW2)			SerCoW2 <- glmer(cbind(SerRkla, SsNeg)~Period + (1|Field), family = binomial, data = CoOverW2)			RickW1 <- glmer(cbind(Rick, RickNeg)~Time + (1|Field), family = binomial, data = OverW1)			RickCoW1 <- glmer(cbind(RickHD, RickNeg)~Period + (1|Field), family = binomial, data = CoOverW1)			RickW2 <- glmer(cbind(Rick, RickNeg)~Time + (1|Field), family = binomial, data = OverW2)			RickCoW2 <- glmer(cbind(RickHD, RickNeg)~Period + (1|Field), family = binomial, data = CoOverW2)			XW1 <- glmer(cbind(X, Xneg)~Time + (1|Field), family = binomial, data = OverW1)						XW2 <- glmer(cbind(X, Xneg)~Time + (1|Field), family = binomial, data = OverW2)						RclW1 <- glmer(cbind(Rcl, RclNeg)~Time + (1|Field), family = binomial, data = OverW1)
summary(RegW1)			summary(RegCoW1)			summary(RegW2)			summary(RegCoW2)			summary(SerW1)			summary(SerCoW1)			summary(SerW2)			summary(SerCoW2)			summary(RickW1)			summary(RickCoW1)			summary(RickW2)			summary(RickCoW2)			summary(XW1)						summary(XW2)						summary(RclW1)
Generalized linear mixed model fit by maximum likelihood (Laplace Approximation) ['glmerMod']			Generalized linear mixed model fit by maximum likelihood (Laplace Approximation) ['glmerMod']			Generalized linear mixed model fit by maximum likelihood (Laplace Approximation) ['glmerMod']			Generalized linear mixed model fit by maximum likelihood (Laplace Approximation) ['glmerMod']			Generalized linear mixed model fit by maximum likelihood (Laplace Approximation) ['glmerMod']			Generalized linear mixed model fit by maximum likelihood (Laplace Approximation) ['glmerMod']			Generalized linear mixed model fit by maximum likelihood (Laplace Approximation) ['glmerMod']			Generalized linear mixed model fit by maximum likelihood (Laplace Approximation) ['glmerMod']			Generalized linear mixed model fit by maximum likelihood (Laplace Approximation) ['glmerMod']			Generalized linear mixed model fit by maximum likelihood (Laplace Approximation) ['glmerMod']			Generalized linear mixed model fit by maximum likelihood (Laplace Approximation) ['glmerMod']			Generalized linear mixed model fit by maximum likelihood (Laplace Approximation) ['glmerMod']			Generalized linear mixed model fit by maximum likelihood (Laplace Approximation) ['glmerMod']						Generalized linear mixed model fit by maximum likelihood (Laplace Approximation) ['glmerMod']						Generalized linear mixed model fit by maximum likelihood (Laplace Approximation) ['glmerMod']
Family: binomial ( logit )			Family: binomial ( logit )			Family: binomial ( logit )			Family: binomial ( logit )			Family: binomial ( logit )			Family: binomial ( logit )			Family: binomial ( logit )			Family: binomial ( logit )			Family: binomial ( logit )			Family: binomial ( logit )			Family: binomial ( logit )			Family: binomial ( logit )			Family: binomial ( logit )						Family: binomial ( logit )						Family: binomial ( logit )
Formula: cbind(Ri, RiNeg) ~ Time + (1 | Field)			Formula: cbind(RegHD, RiNeg) ~ Period + (1 | Field)			Formula: cbind(Ri, RiNeg) ~ Time + (1 | Field)			Formula: cbind(RegHD, RiNeg) ~ Period + (1 | Field)			Formula: cbind(Ss, SsNeg) ~ Time + (1 | Field)			Formula: cbind(SerRkla, SsNeg) ~ Period + (1 | Field)			Formula: cbind(Ss, SsNeg) ~ Time + (1 | Field)			Formula: cbind(SerRkla, SsNeg) ~ Period + (1 | Field)			Formula: cbind(Rick, RickNeg) ~ Time + (1 | Field)			Formula: cbind(RickHD, RickNeg) ~ Period + (1 | Field)			Formula: cbind(Rick, RickNeg) ~ Time + (1 | Field)			Formula: cbind(RickHD, RickNeg) ~ Period + (1 | Field)			Formula: cbind(X, Xneg) ~ Time + (1 | Field)						Formula: cbind(X, Xneg) ~ Time + (1 | Field)						Formula: cbind(Rcl, RclNeg) ~ Time + (1 | Field)
Data: OverW1			Data: CoOverW1			Data: OverW2			Data: CoOverW2			Data: OverW1			Data: CoOverW1			Data: OverW2			Data: CoOverW2			Data: OverW1			Data: CoOverW1			Data: OverW2			Data: CoOverW2			Data: OverW1						Data: OverW2						Data: OverW1
AIC BIC logLik deviance df.resid			AIC BIC logLik deviance df.resid			AIC BIC logLik deviance df.resid			AIC BIC logLik deviance df.resid			AIC BIC logLik deviance df.resid			AIC BIC logLik deviance df.resid			AIC BIC logLik deviance df.resid			AIC BIC logLik deviance df.resid			AIC BIC logLik deviance df.resid			AIC BIC logLik deviance df.resid			AIC BIC logLik deviance df.resid			AIC BIC logLik deviance df.resid			AIC BIC logLik deviance df.resid						AIC BIC logLik deviance df.resid						AIC BIC logLik deviance df.resid
43.2 44.1 -18.6 37.2 7			38.8 39.7 -16.4 32.8 7			43.3 44.7 -18.6 37.3 9			34.2 35.6 -14.1 28.2 9			49.4 50.4 -21.7 43.4 7			37.2 38.1 -15.6 31.2 7			51.3 52.8 -22.7 45.3 9			29.8 31.3 -11.9 23.8 9			40.3 41.2 -17.2 34.3 7			32.7 33.6 -13.4 26.7 7			41.9 43.4 -18.0 35.9 9			25.7 27.2 -9.9 19.7 9			39.0 39.9 -16.5 33.0 7						48.5 50.0 -21.3 42.5 9						46.2 47.1 -20.1 40.2 7
Scaled residuals:			Scaled residuals:			Scaled residuals:			Scaled residuals:			Scaled residuals:			Scaled residuals:			Scaled residuals:			Scaled residuals:			Scaled residuals:			Scaled residuals:			Scaled residuals:			Scaled residuals:			Scaled residuals:						Scaled residuals:						Scaled residuals:
Min 1Q Median 3Q Max			Min 1Q Median 3Q Max			Min 1Q Median 3Q Max			Min 1Q Median 3Q Max			Min 1Q Median 3Q Max			Min 1Q Median 3Q Max			Min 1Q Median 3Q Max			Min 1Q Median 3Q Max			Min 1Q Median 3Q Max			Min 1Q Median 3Q Max			Min 1Q Median 3Q Max			Min 1Q Median 3Q Max			Min 1Q Median 3Q Max						Min 1Q Median 3Q Max						Min 1Q Median 3Q Max
-1.41887 -0.43010 0.08773 0.65935 1.39513			-1.5148 -0.2563 0.1931 0.5328 1.2583			-0.9738 -0.7007 -0.2672 0.3317 1.3796			-0.8001 -0.6548 -0.2972 0.3031 1.6275			-1.49334 -0.78462 -0.04072 0.90741 1.50694			-1.1747 -0.7254 -0.1783 0.7550 2.1387			-1.23498 -0.44607 0.00112 0.35837 2.63004			-0.84487 -0.40427 -0.28999 -0.05898 1.95255			-0.9094 -0.7074 -0.2480 0.4286 1.4209			-1.05131 -0.51214 -0.18732 0.06723 1.62275			-1.4591 -1.0599 -0.1075 0.8430 1.9495			-0.7335 -0.5240 -0.3204 0.4085 1.3616			-1.1888 -0.6935 -0.2801 0.2308 1.2660						-1.35768 -0.79364 -0.09604 0.53604 2.35633						-1.6546 -0.4774 -0.1934 0.2190 1.7212
Random effects:			Random effects:			Random effects:			Random effects:			Random effects:			Random effects:			Random effects:			Random effects:			Random effects:			Random effects:			Random effects:			Random effects:			Random effects:						Random effects:						Random effects:
Groups Name Variance Std.Dev.			Groups Name Variance Std.Dev.			Groups Name Variance Std.Dev.			Groups Name Variance Std.Dev.			Groups Name Variance Std.Dev.			Groups Name Variance Std.Dev.			Groups Name Variance Std.Dev.			Groups Name Variance Std.Dev.			Groups Name Variance Std.Dev.			Groups Name Variance Std.Dev.			Groups Name Variance Std.Dev.			Groups Name Variance Std.Dev.			Groups Name Variance Std.Dev.						Groups Name Variance Std.Dev.						Groups Name Variance Std.Dev.
Field (Intercept) 0 0			Field (Intercept) 0 0			Field (Intercept) 0.4178 0.6464			Field (Intercept) 0.5105 0.7145			Field (Intercept) 0.0667 0.2583			Field (Intercept) 0 0			Field (Intercept) 1.267 1.126			Field (Intercept) 0.5976 0.7731			Field (Intercept) 0 0			Field (Intercept) 0 0			Field (Intercept) 0 0			Field (Intercept) 0.5001 0.7072			Field (Intercept) 0.7556 0.8692						Field (Intercept) 0 0						Field (Intercept) 2.5e-17 5e-09
Number of obs: 10, groups: Field, 5			Number of obs: 10, groups: Field, 5			Number of obs: 12, groups: Field, 6			Number of obs: 12, groups: Field, 6			Number of obs: 10, groups: Field, 5			Number of obs: 10, groups: Field, 5			Number of obs: 12, groups: Field, 6			Number of obs: 12, groups: Field, 6			Number of obs: 10, groups: Field, 5			Number of obs: 10, groups: Field, 5			Number of obs: 12, groups: Field, 6			Number of obs: 12, groups: Field, 6			Number of obs: 10, groups: Field, 5						Number of obs: 12, groups: Field, 6						Number of obs: 10, groups: Field, 5
Fixed effects:			Fixed effects:			Fixed effects:			Fixed effects:			Fixed effects:			Fixed effects:			Fixed effects:			Fixed effects:			Fixed effects:			Fixed effects:			Fixed effects:			Fixed effects:			Fixed effects:						Fixed effects:						Fixed effects:
Estimate Std. Error z value Pr(>|z|)			Estimate Std. Error z value Pr(>|z|)			Estimate Std. Error z value Pr(>|z|)			Estimate Std. Error z value Pr(>|z|)			Estimate Std. Error z value Pr(>|z|)			Estimate Std. Error z value Pr(>|z|)			Estimate Std. Error z value Pr(>|z|)			Estimate Std. Error z value Pr(>|z|)			Estimate Std. Error z value Pr(>|z|)			Estimate Std. Error z value Pr(>|z|)			Estimate Std. Error z value Pr(>|z|)			Estimate Std. Error z value Pr(>|z|)			Estimate Std. Error z value Pr(>|z|)						Estimate Std. Error z value Pr(>|z|)						Estimate Std. Error z value Pr(>|z|)
(Intercept) -1.4690 0.2060 -7.132 9.86e-13 ***			(Intercept) -1.5151 0.2470 -6.135 8.51e-10 ***	There is likely a difference between fall and spring when Hamiltonella is removed		(Intercept) -2.5927 0.4664 -5.559 2.71e-08 ***			(Intercept) -3.2646 0.5980 -5.459 4.79e-08 ***			(Intercept) -1.7864 0.2696 -6.625 3.47e-11 ***			(Intercept) -2.1102 0.3057 -6.904 5.07e-12 ***			(Intercept) -4.2560 0.7341 -5.797 6.74e-09 ***			(Intercept) -5.180 1.128 -4.593 4.38e-06 ***	There may be a difference between the two timepoints without the coinfecting Rickettsiella		(Intercept) -1.6017 0.2150 -7.451 9.28e-14 ***			(Intercept) -2.4639 0.3683 -6.690 2.23e-11 ***			(Intercept) -3.5766 0.5069 -7.055 1.72e-12 ***			(Intercept) -5.128 1.149 -4.463 8.1e-06 ***			(Intercept) -3.2097 0.5902 -5.439 5.37e-08 ***						(Intercept) -2.3329 0.2905 -8.031 9.68e-16 ***						(Intercept) -2.0296 0.2507 -8.095 5.7e-16 ***
Time15 -0.7440 0.3488 -2.133 0.0329 *			Period15 -1.2394 0.4615 -2.686 0.00723 **			Time17 -0.5016 0.4582 -1.095 0.274			Period17 -0.4592 0.6639 -0.692 0.489			Time15 0.3747 0.3323 1.128 0.259			Period15 -0.7032 0.5197 -1.353 0.176			Time17 2.7665 0.6413 4.314 1.60e-05 ***			Period17 2.216 1.088 2.038 0.0416 *			Time15 -0.9785 0.3922 -2.495 0.0126 *			Period15 -0.4806 0.5577 -0.862 0.389			Time17 0.9310 0.5953 1.564 0.118			Period17 1.641 1.107 1.483 0.138			Time15 0.1182 0.5456 0.217 0.828						Time17 0.1622 0.3872 0.419 0.675						Time15 1.0584 0.3134 3.378 0.000731 ***
---			---			---			---			---			---			---			---			---			---			---			---			---						---						---
Signif. codes: 0 ‘***’ 0.001 ‘**’ 0.01 ‘*’ 0.05 ‘.’ 0.1 ‘ ’ 1			Signif. codes: 0 ‘***’ 0.001 ‘**’ 0.01 ‘*’ 0.05 ‘.’ 0.1 ‘ ’ 1			Signif. codes: 0 ‘***’ 0.001 ‘**’ 0.01 ‘*’ 0.05 ‘.’ 0.1 ‘ ’ 1			Signif. codes: 0 ‘***’ 0.001 ‘**’ 0.01 ‘*’ 0.05 ‘.’ 0.1 ‘ ’ 1			Signif. codes: 0 ‘***’ 0.001 ‘**’ 0.01 ‘*’ 0.05 ‘.’ 0.1 ‘ ’ 1			Signif. codes: 0 ‘***’ 0.001 ‘**’ 0.01 ‘*’ 0.05 ‘.’ 0.1 ‘ ’ 1			Signif. codes: 0 ‘***’ 0.001 ‘**’ 0.01 ‘*’ 0.05 ‘.’ 0.1 ‘ ’ 1			Signif. codes: 0 ‘***’ 0.001 ‘**’ 0.01 ‘*’ 0.05 ‘.’ 0.1 ‘ ’ 1			Signif. codes: 0 ‘***’ 0.001 ‘**’ 0.01 ‘*’ 0.05 ‘.’ 0.1 ‘ ’ 1			Signif. codes: 0 ‘***’ 0.001 ‘**’ 0.01 ‘*’ 0.05 ‘.’ 0.1 ‘ ’ 1			Signif. codes: 0 ‘***’ 0.001 ‘**’ 0.01 ‘*’ 0.05 ‘.’ 0.1 ‘ ’ 1			Signif. codes: 0 ‘***’ 0.001 ‘**’ 0.01 ‘*’ 0.05 ‘.’ 0.1 ‘ ’ 1			Signif. codes: 0 ‘***’ 0.001 ‘**’ 0.01 ‘*’ 0.05 ‘.’ 0.1 ‘ ’ 1						Signif. codes: 0 ‘***’ 0.001 ‘**’ 0.01 ‘*’ 0.05 ‘.’ 0.1 ‘ ’ 1						Signif. codes: 0 ‘***’ 0.001 ‘**’ 0.01 ‘*’ 0.05 ‘.’ 0.1 ‘ ’ 1
Correlation of Fixed Effects:			Correlation of Fixed Effects:			Correlation of Fixed Effects:			Correlation of Fixed Effects:			Correlation of Fixed Effects:			Correlation of Fixed Effects:			Correlation of Fixed Effects:			Correlation of Fixed Effects:			Correlation of Fixed Effects:			Correlation of Fixed Effects:			Correlation of Fixed Effects:			Correlation of Fixed Effects:			Correlation of Fixed Effects:						Correlation of Fixed Effects:						Correlation of Fixed Effects:
(Intr)			(Intr)			(Intr)			(Intr)			(Intr)			(Intr)			(Intr)			(Intr)			(Intr)			(Intr)			(Intr)			(Intr)			(Intr)						(Intr)						(Intr)
Time15 -0.590			Period15 -0.535			Time17 -0.427			Period17 -0.465			Time15 -0.637			Period15 -0.588			Time17 -0.694			Period17 -0.856			Time15 -0.548			Period15 -0.660			Time17 -0.852			Period17 -0.812			Time15 -0.433						Time17 -0.750						Time15 -0.800
optimizer (Nelder_Mead) convergence code: 0 (OK)			optimizer (Nelder_Mead) convergence code: 0 (OK)												optimizer (Nelder_Mead) convergence code: 0 (OK)									optimizer (Nelder_Mead) convergence code: 0 (OK)			optimizer (Nelder_Mead) convergence code: 0 (OK)			optimizer (Nelder_Mead) convergence code: 0 (OK)												optimizer (Nelder_Mead) convergence code: 0 (OK)						optimizer (Nelder_Mead) convergence code: 0 (OK)
boundary (singular) fit: see ?isSingular			boundary (singular) fit: see ?isSingular			RegW2X <- update(RegW2, .~. -Time)			RegCoW2X <- update(RegCoW2, .~. -Period)			SerW1X <- update(SerW1, .~. -Time)			boundary (singular) fit: see ?isSingular			SerW2X <- update(SerW2, .~. -Time)			SerCoW2X <- update(SerCoW2, .~. -Period)			boundary (singular) fit: see ?isSingular			boundary (singular) fit: see ?isSingular			boundary (singular) fit: see ?isSingular			RickCoW2X <- update(RickCoW2, .~. -Period)			XW1X <- update(XW1, .~. -Time)						boundary (singular) fit: see ?isSingular						boundary (singular) fit: see ?isSingular
									anova(RegCoW2, RegCoW2X)												anova(SerCoW2, SerCoW2X)												anova(RickCoW2, RickCoW2X)
RegW1X <- update(RegW1, .~. -Time)			RegCoW1X <- update(RegCoW1, .~. -Period)			anova(RegW2, RegW2X)			Data: CoOverW2			anova(SerW1, SerW1X)			SerCoW1X <- update(SerCoW1, .~. -Period)			anova(SerW2, SerW2X)			Data: CoOverW2			RickW1X <- update(RickW1, .~. -Time)			RickCoW1X <- update(RickCoW1, .~. -Period)			RickW2X <- update(RickW2, .~. -Time)			Data: CoOverW2			anova(XW1, XW1X)						XW2X <- update(XW2, .~. -Time)						RclW1X <- update(RclW1, .~. -Time)
			anova(RegCoW1, RegCoW1X)			Data: OverW2			Models:			Data: OverW1			anova(SerCoW1, SerCoW1X)			Data: OverW2			Models:						anova(RickCoW1, RickCoW1X)			anova(RickW2, RickW2X)			Models:			Data: OverW1
anova(RegW1, RegW1X)			Data: CoOverW1			Models:			RegCoW2X: cbind(RegHD, RiNeg) ~ (1 | Field)			Models:			Data: CoOverW1			Models:			SerCoW2X: cbind(SerRkla, SsNeg) ~ (1 | Field)			anova(RickW1, RickW1X)			Data: CoOverW1			Data: OverW2			RickCoW2X: cbind(RickHD, RickNeg) ~ (1 | Field)			Models:						anova(XW2, XW2X)						anova(RclW1, RclW1X)
Data: OverW1			Models:			RegW2X: cbind(Ri, RiNeg) ~ (1 | Field)			RegCoW2: cbind(RegHD, RiNeg) ~ Period + (1 | Field)			SerW1X: cbind(Ss, SsNeg) ~ (1 | Field)			Models:			SerW2X: cbind(Ss, SsNeg) ~ (1 | Field)			SerCoW2: cbind(SerRkla, SsNeg) ~ Period + (1 | Field)			Data: OverW1			Models:			Models:			RickCoW2: cbind(RickHD, RickNeg) ~ Period + (1 | Field)			XW1X: cbind(X, Xneg) ~ (1 | Field)						Data: OverW2						Data: OverW1
Models:			RegCoW1X: cbind(RegHD, RiNeg) ~ (1 | Field)			RegW2: cbind(Ri, RiNeg) ~ Time + (1 | Field)			npar AIC BIC logLik deviance Chisq Df Pr(>Chisq)			SerW1: cbind(Ss, SsNeg) ~ Time + (1 | Field)			SerCoW1X: cbind(SerRkla, SsNeg) ~ (1 | Field)			SerW2: cbind(Ss, SsNeg) ~ Time + (1 | Field)			npar AIC BIC logLik deviance Chisq Df Pr(>Chisq)			Models:			RickCoW1X: cbind(RickHD, RickNeg) ~ (1 | Field)			RickW2X: cbind(Rick, RickNeg) ~ (1 | Field)			npar AIC BIC logLik deviance Chisq Df Pr(>Chisq)			XW1: cbind(X, Xneg) ~ Time + (1 | Field)						Models:						Models:
RegW1X: cbind(Ri, RiNeg) ~ (1 | Field)			RegCoW1: cbind(RegHD, RiNeg) ~ Period + (1 | Field)			npar AIC BIC logLik deviance Chisq Df Pr(>Chisq)			RegCoW2X 2 32.645 33.614 -14.322 28.645			npar AIC BIC logLik deviance Chisq Df Pr(>Chisq)			SerCoW1: cbind(SerRkla, SsNeg) ~ Period + (1 | Field)			npar AIC BIC logLik deviance Chisq Df Pr(>Chisq)			SerCoW2X 2 34.266 35.236 -15.133 30.266			RickW1X: cbind(Rick, RickNeg) ~ (1 | Field)			RickCoW1: cbind(RickHD, RickNeg) ~ Period + (1 | Field)			RickW2: cbind(Rick, RickNeg) ~ Time + (1 | Field)			RickCoW2X 2 26.650 27.619 -11.3248 22.650			npar AIC BIC logLik deviance Chisq Df Pr(>Chisq)						XW2X: cbind(X, Xneg) ~ (1 | Field)	AIC is lower in time removed model, suggesting time (and thus overwintering) is not significant					RclW1X: cbind(Rcl, RclNeg) ~ (1 | Field)
RegW1: cbind(Ri, RiNeg) ~ Time + (1 | Field)			npar AIC BIC logLik deviance Chisq Df Pr(>Chisq)			RegW2X 2 42.468 43.438 -19.234 38.468	AIC is lower in time removed model, suggesting time (and thus overwintering) is not significant		RegCoW2 3 34.157 35.611 -14.078 28.157 0.4878 1 0.4849	Model with time removed is slighlty better, and models are otherwise not significantly different. There is likely no difference between fall and spring when coinfecting Hamiltonella is removed		SerW1X 2 48.722 49.327 -22.361 44.722	AIC is lower in time removed model, suggesting time (and thus overwintering) is not significant		npar AIC BIC logLik deviance Chisq Df Pr(>Chisq)			SerW2X 2 80.161 81.131 -38.081 76.161	Removing time lowers AIC, suggesting time (and thus overwintering) is significant		SerCoW2 3 29.846 31.301 -11.923 23.846 6.4199 1 0.01128 *	Model with time is slighlty better. There likely is a difference between fall and spring when coinfecting Rickettsiella removed		RickW1: cbind(Rick, RickNeg) ~ Time + (1 | Field)			npar AIC BIC logLik deviance Chisq Df Pr(>Chisq)			npar AIC BIC logLik deviance Chisq Df Pr(>Chisq)			RickCoW2 3 25.705 27.160 -9.8527 19.705 2.9442 1 0.08619 .	The model with time is very slightly better (marginally significant). There may be some difference between the fall and spring when aphids harboring Rickettsia and Hamiltonella co-infections are removed		XW1X 2 37.039 37.644 -16.519 33.039	AIC is lower in time removed model, suggesting time (and thus overwintering) is not significant					XW2: cbind(X, Xneg) ~ Time + (1 | Field)						RclW1: cbind(Rcl, RclNeg) ~ Time + (1 | Field)
npar AIC BIC logLik deviance Chisq Df Pr(>Chisq)			RegCoW1X 2 44.960 45.565 -20.480 40.960			RegW2 3 43.251 44.706 -18.625 37.251 1.2174 1 0.2699						SerW1 3 49.450 50.358 -21.725 43.450 1.2724 1 0.2593			SerCoW1X 2 37.120 37.725 -16.560 33.120	Model without time is about the same, and there is no real difference between the two models. There is probably not a difference between fall and spring when coinfecting Rickettsiella is removed		SerW2 3 51.330 52.785 -22.665 45.330 30.831 1 2.815e-08 ***			---			npar AIC BIC logLik deviance Chisq Df Pr(>Chisq)			RickCoW1X 2 31.464 32.069 -13.732 27.464	Model without time is slighlty better and there is not much difference between the models. There is likley no difference between fall and spring after removal of co-infections with Hamiltonella		RickW2X 2 42.660 43.629 -19.330 38.660	Removing time slightly lowers AIC, suggesting time (and thus overwintering) may be significant		---			XW1 3 38.992 39.899 -16.496 32.992 0.047 1 0.8283						npar AIC BIC logLik deviance Chisq Df Pr(>Chisq)						npar AIC BIC logLik deviance Chisq Df Pr(>Chisq)
RegW1X 2 45.977 46.582 -20.988 41.977	Removing time lowers AIC, suggesting time (and thus overwintering) is significant		RegCoW1 3 38.792 39.700 -16.396 32.792 8.1676 1 0.004265 **	The model with time is better, there is a difference between fall and spring when Hamiltonella coinfections are removed											SerCoW1 3 37.191 38.099 -15.596 31.191 1.9286 1 0.1649			---			Signif. codes: 0 ‘***’ 0.001 ‘**’ 0.01 ‘*’ 0.05 ‘.’ 0.1 ‘ ’ 1			RickW1X 2 45.166 45.771 -20.583 41.166	Removing time lowers AIC, suggesting time (and thus overwintering) is significant		RickCoW1 3 32.712 33.620 -13.356 26.712 0.7517 1 0.3859			RickW2 3 41.933 43.388 -17.967 35.933 2.7262 1 0.09871 .			Signif. codes: 0 ‘***’ 0.001 ‘**’ 0.01 ‘*’ 0.05 ‘.’ 0.1 ‘ ’ 1									XW2X 2 46.686 47.656 -21.343 42.686						RclW1X 2 56.355 56.960 -26.177 52.355	Removing time lowers AIC, suggesting time (and thus overwintering) is significant
RegW1 3 43.186 44.094 -18.593 37.186 4.7908 1 0.02861 *			---															Signif. codes: 0 ‘***’ 0.001 ‘**’ 0.01 ‘*’ 0.05 ‘.’ 0.1 ‘ ’ 1						RickW1 3 40.335 41.243 -17.168 34.335 6.8312 1 0.008958 **						---												XW2 3 48.510 49.965 -21.255 42.510 0.1763 1 0.6746						RclW1 3 46.169 47.077 -20.084 40.169 12.186 1 0.0004815 ***
---			Signif. codes: 0 ‘***’ 0.001 ‘**’ 0.01 ‘*’ 0.05 ‘.’ 0.1 ‘ ’ 1																					---						Signif. codes: 0 ‘***’ 0.001 ‘**’ 0.01 ‘*’ 0.05 ‘.’ 0.1 ‘ ’ 1																		---
Signif. codes: 0 ‘***’ 0.001 ‘**’ 0.01 ‘*’ 0.05 ‘.’ 0.1 ‘ ’ 1																								Signif. codes: 0 ‘***’ 0.001 ‘**’ 0.01 ‘*’ 0.05 ‘.’ 0.1 ‘ ’ 1																								Signif. codes: 0 ‘***’ 0.001 ‘**’ 0.01 ‘*’ 0.05 ‘.’ 0.1 ‘ ’ 1

## Sheet: Table S6-2012EnvMdlHtchhkStats 
Table S6: Statistical analyses on our 2012 longitudinal field study - symbionts vs. environmental variables with tests of robustness to hitchhiking effects (i.e. by model-reassessment after removing the most common co-infection)
>first assessed whether symbionts changed over time after removal of aphids w/that symbiont and its most common co-infector; if so, assessed whether factors/correlates from original environmental model in Table S4, remained significant
	Regiella across our 2012 longitudinal field study: variation over time after eliminating samples with Regiella and its most common co-infector (Hamiltonella)			Regiella across our 2012 longitudinal field study - environmental variables (Simultaneous analysis) - eliminated all Regiella+ aphids also harboring Hamiltonella			Rickettsia across our 2012 longitudinal field study: variation over time after eliminating samples with Rickettsiaand its most common co-infector (Hamiltonella)			Serratia across our 2012 longitudinal field study: variation over time after eliminating samples with Serratia and its most common co-infector (Rickettsiella)			Serratia across our 2012 longitudinal field study - environmental variables (Simultaneous analysis) - eliminated all Serratia+ aphids also harboring Rickettsiella			Hamiltonella across our 2012 longitudinal field study: variation over time after eliminating samples with Hamiltonella and one of its 2 most common co-infectors (Rickettsiella)			Hamiltonella across our 2012 longitudinal field study - environmental variables (Simultaneous analysis) - eliminated all Hamiltonella+ aphids also harboring Rickettsiella			Hamiltonella across our 2012 longitudinal field study: variation over time after eliminating samples with Hamiltonella and one of its 2 most common co-infectors (Rickettsia)			Hamiltonella across our 2012 longitudinal field study - environmental variables (Simultaneous analysis) - eliminated all Hamiltonella+ aphids also harboring Rickettsia			Rickettsiella across our 2012 longitudinal field study: variation over time after eliminating samples with Rickettsiella and its most common co-infector (Hamiltonella)			Rickettsiella across our 2012 longitudinal field study - environmental variables (Simultaneous analysis) - eliminated all Rickettsiella+ aphids also harboring Hamiltonella			Spiroplasma across our 2012 longitudinal field study: variation over time after eliminating samples with Spiroplasma and its most common co-infector (Hamiltonella)			Spiroplasma across our 2012 longitudinal field study - environmental variables (Simultaneous analysis) - eliminated all Spiroplasma+ aphids also harboring Hamiltonella
	> library(lme4)			> library(lme4)			> library(lme4)			> library(lme4)			> library(lme4)			> library(lme4)			> library(lme4)			> library(lme4)			> library(lme4)			RklaRemPeriod <- glmer(cbind(RklaHD, nRklaneg)~fPeriod + (1|fField), family = binomial, data = RemovedCoinfection)			RklaRem <- glmer(cbind(RklaHD, nRklaneg)~stdmaTA+stdmaVap+lgWingAph+lgAphDen+lgAervi+lgLeafHop+lgCoccin+Psurv+Paervi+Ppandora + (1|fField), family = binomial, data = RemovedCoinfection)			SpiRemPeriod <- glmer(cbind(SpiHD, nSpineg)~fPeriod + (1|fField), family = binomial, data = RemovedCoinfection)			SpiRem <- glmer(cbind(SpiHD, nSpineg)~stdmaTA+stdmaVap+lgWingAph+lgAphDen+lgAervi+lgLeafHop+lgCoccin+Psurv+Paervi+Ppandora + (1|fField), family = binomial, data = RemovedCoinfection)
	> DataforGlm <- read.table("hitchhiking analysis1.csv",header=T,sep = ",")			> DataforGlm <- read.table("hitchhiking analysis1.csv",header=T,sep = ",")			> DataforGlm <- read.table("hitchhiking analysis1.csv",header=T,sep = ",")			> DataforGlm <- read.table("hitchhiking analysis1.csv",header=T,sep = ",")			> DataforGlm <- read.table("hitchhiking analysis1.csv",header=T,sep = ",")			> DataforGlm <- read.table("hitchhiking analysis Ham.csv",header=T,sep = ",")			> DataforGlm <- read.table("hitchhiking analysis Ham.csv",header=T,sep = ",")			> DataforGlm <- read.table("hitchhiking analysis Ham.csv",header=T,sep = ",")			> DataforGlm <- read.table("hitchhiking analysis Ham.csv",header=T,sep = ",")			summary(RklaRemPeriod)			summary(RklaRem)			summary(SpiRemPeriod)			summary(SpiRem)
	> str(DataforGlm)			> str(DataforGlm)			> str(DataforGlm)			> str(DataforGlm)			> str(DataforGlm)			> str(DataforGlm)			> str(DataforGlm)			> str(DataforGlm)			> str(DataforGlm)			Generalized linear mixed model fit by maximum likelihood (Laplace Approximation) ['glmerMod']			Generalized linear mixed model fit by maximum likelihood (Laplace Approximation) ['glmerMod']			Generalized linear mixed model fit by maximum likelihood (Laplace Approximation) ['glmerMod']			Generalized linear mixed model fit by maximum likelihood (Laplace Approximation) ['glmerMod']
	data.frame':	999 obs. of 34 variables:		data.frame':	999 obs. of 34 variables:		data.frame':	999 obs. of 34 variables:		data.frame':	999 obs. of 34 variables:		data.frame':	999 obs. of 34 variables:		data.frame':	999 obs. of 38 variables:		data.frame':	999 obs. of 38 variables:		data.frame':	999 obs. of 38 variables:		data.frame':	999 obs. of 38 variables:		Family: binomial ( logit )			Family: binomial ( logit )			Family: binomial ( logit )			Family: binomial ( logit )
	$ ï..Julian.date: int 116 130 144 158 171 184 200 214 228 242 ...			$ ï..Julian.date: int 116 130 144 158 171 184 200 214 228 242 ...			$ ï..Julian.date: int 116 130 144 158 171 184 200 214 228 242 ...			$ ï..Julian.date: int 116 130 144 158 171 184 200 214 228 242 ...			$ ï..Julian.date: int 116 130 144 158 171 184 200 214 228 242 ...			$ ï..Julian.date: int 116 130 144 158 171 184 200 214 228 242 ...			$ ï..Julian.date: int 116 130 144 158 171 184 200 214 228 242 ...			$ ï..Julian.date: int 116 130 144 158 171 184 200 214 228 242 ...			$ ï..Julian.date: int 116 130 144 158 171 184 200 214 228 242 ...			Formula: cbind(RklaHD, nRklaneg) ~ fPeriod + (1 | fField)			Formula: cbind(RklaHD, nRklaneg) ~ stdmaTA + stdmaVap + lgWingAph + lgAphDen + lgAervi + lgLeafHop + lgCoccin + Psurv + Paervi + Ppandora +			Formula: cbind(SpiHD, nSpineg) ~ fPeriod + (1 | fField)			Formula: cbind(SpiHD, nSpineg) ~ stdmaTA + stdmaVap + lgWingAph + lgAphDen + lgAervi + lgLeafHop + lgCoccin + Psurv + Paervi + Ppandora +
	$ Field : int 1 1 1 1 1 1 1 1 1 1 ...			$ Field : int 1 1 1 1 1 1 1 1 1 1 ...			$ Field : int 1 1 1 1 1 1 1 1 1 1 ...			$ Field : int 1 1 1 1 1 1 1 1 1 1 ...			$ Field : int 1 1 1 1 1 1 1 1 1 1 ...			$ Field : int 1 1 1 1 1 1 1 1 1 1 ...			$ Field : int 1 1 1 1 1 1 1 1 1 1 ...			$ Field : int 1 1 1 1 1 1 1 1 1 1 ...			$ Field : int 1 1 1 1 1 1 1 1 1 1 ...			Data: RemovedCoinfection			(1 | fField)			Data: RemovedCoinfection			(1 | fField)
	$ Period : int 1 2 3 4 5 6 7 8 9 10 ...			$ Period : int 1 2 3 4 5 6 7 8 9 10 ...			$ Period : int 1 2 3 4 5 6 7 8 9 10 ...			$ Period : int 1 2 3 4 5 6 7 8 9 10 ...			$ Period : int 1 2 3 4 5 6 7 8 9 10 ...			$ Period : int 1 2 3 4 5 6 7 8 9 10 ...			$ Period : int 1 2 3 4 5 6 7 8 9 10 ...			$ Period : int 1 2 3 4 5 6 7 8 9 10 ...			$ Period : int 1 2 3 4 5 6 7 8 9 10 ...						Data: RemovedCoinfection						Data: RemovedCoinfection
	$ maTaavg : num 13 15.7 19.6 20 21.2 ...			$ maTaavg : num 13 15.7 19.6 20 21.2 ...			$ maTaavg : num 13 15.7 19.6 20 21.2 ...			$ maTaavg : num 13 15.7 19.6 20 21.2 ...			$ maTaavg : num 13 15.7 19.6 20 21.2 ...			$ maTaavg : num 13 15.7 19.6 20 21.2 ...			$ maTaavg : num 13 15.7 19.6 20 21.2 ...			$ maTaavg : num 13 15.7 19.6 20 21.2 ...			$ maTaavg : num 13 15.7 19.6 20 21.2 ...			AIC BIC logLik deviance df.resid						AIC BIC logLik deviance df.resid
	$ stdmaTA : num -1.2923 -0.7519 0.0638 0.1504 0.3875 ...			$ stdmaTA : num -1.2923 -0.7519 0.0638 0.1504 0.3875 ...			$ stdmaTA : num -1.2923 -0.7519 0.0638 0.1504 0.3875 ...			$ stdmaTA : num -1.2923 -0.7519 0.0638 0.1504 0.3875 ...			$ stdmaTA : num -1.2923 -0.7519 0.0638 0.1504 0.3875 ...			$ stdmaTA : num -1.2923 -0.7519 0.0638 0.1504 0.3875 ...			$ stdmaTA : num -1.2923 -0.7519 0.0638 0.1504 0.3875 ...			$ stdmaTA : num -1.2923 -0.7519 0.0638 0.1504 0.3875 ...			$ stdmaTA : num -1.2923 -0.7519 0.0638 0.1504 0.3875 ...			303.1 338.1 -136.6 273.1 61			AIC BIC logLik deviance df.resid			225.5 260.5 -97.8 195.5 61			AIC BIC logLik deviance df.resid
	$ maVapdef : num 2.01 1.71 3.65 1.89 1.14 ...			$ maVapdef : num 2.01 1.71 3.65 1.89 1.14 ...			$ maVapdef : num 2.01 1.71 3.65 1.89 1.14 ...			$ maVapdef : num 2.01 1.71 3.65 1.89 1.14 ...			$ maVapdef : num 2.01 1.71 3.65 1.89 1.14 ...			$ maVapdef : num 2.01 1.71 3.65 1.89 1.14 ...			$ maVapdef : num 2.01 1.71 3.65 1.89 1.14 ...			$ maVapdef : num 2.01 1.71 3.65 1.89 1.14 ...			$ maVapdef : num 2.01 1.71 3.65 1.89 1.14 ...						373.0 400.9 -174.5 349.0 64						195.6 223.6 -85.8 171.6 64
	$ stdmaVap : num -0.0388 -0.2373 1.0483 -0.1196 -0.6134 ...			$ stdmaVap : num -0.0388 -0.2373 1.0483 -0.1196 -0.6134 ...			$ stdmaVap : num -0.0388 -0.2373 1.0483 -0.1196 -0.6134 ...			$ stdmaVap : num -0.0388 -0.2373 1.0483 -0.1196 -0.6134 ...			$ stdmaVap : num -0.0388 -0.2373 1.0483 -0.1196 -0.6134 ...			$ stdmaVap : num -0.0388 -0.2373 1.0483 -0.1196 -0.6134 ...			$ stdmaVap : num -0.0388 -0.2373 1.0483 -0.1196 -0.6134 ...			$ stdmaVap : num -0.0388 -0.2373 1.0483 -0.1196 -0.6134 ...			$ stdmaVap : num -0.0388 -0.2373 1.0483 -0.1196 -0.6134 ...			Scaled residuals:						Scaled residuals:
	$ WingAph : num 0 0.0146 0.08 0 0.0194 ...			$ WingAph : num 0 0.0146 0.08 0 0.0194 ...			$ WingAph : num 0 0.0146 0.08 0 0.0194 ...			$ WingAph : num 0 0.0146 0.08 0 0.0194 ...			$ WingAph : num 0 0.0146 0.08 0 0.0194 ...			$ WingAph : num 0 0.0146 0.08 0 0.0194 ...			$ WingAph : num 0 0.0146 0.08 0 0.0194 ...			$ WingAph : num 0 0.0146 0.08 0 0.0194 ...			$ WingAph : num 0 0.0146 0.08 0 0.0194 ...			Min 1Q Median 3Q Max			Scaled residuals:			Min 1Q Median 3Q Max			Scaled residuals:
	$ lgWingAph : num -3 -1.81 -1.09 -3 -1.69 ...			$ lgWingAph : num -3 -1.81 -1.09 -3 -1.69 ...			$ lgWingAph : num -3 -1.81 -1.09 -3 -1.69 ...			$ lgWingAph : num -3 -1.81 -1.09 -3 -1.69 ...			$ lgWingAph : num -3 -1.81 -1.09 -3 -1.69 ...			$ lgWingAph : num -3 -1.81 -1.09 -3 -1.69 ...			$ lgWingAph : num -3 -1.81 -1.09 -3 -1.69 ...			$ lgWingAph : num -3 -1.81 -1.09 -3 -1.69 ...			$ lgWingAph : num -3 -1.81 -1.09 -3 -1.69 ...			-2.65719 -0.87479 -0.03913 0.67869 2.64473			Min 1Q Median 3Q Max			-1.7953 -0.7980 -0.5526 0.4985 4.0193			Min 1Q Median 3Q Max
	$ AphidDens : num 395.33 154.5 6.25 23.75 51.5 ...			$ AphidDens : num 395.33 154.5 6.25 23.75 51.5 ...			$ AphidDens : num 395.33 154.5 6.25 23.75 51.5 ...			$ AphidDens : num 395.33 154.5 6.25 23.75 51.5 ...			$ AphidDens : num 395.33 154.5 6.25 23.75 51.5 ...			$ AphidDens : num 395.33 154.5 6.25 23.75 51.5 ...			$ AphidDens : num 395.33 154.5 6.25 23.75 51.5 ...			$ AphidDens : num 395.33 154.5 6.25 23.75 51.5 ...			$ AphidDens : num 395.33 154.5 6.25 23.75 51.5 ...						-1.9761 -1.1581 -0.3368 1.0079 4.9016						-1.5619 -0.7779 -0.4054 0.7484 10.5116
	$ lgAphDen : num 2.597 2.189 0.796 1.376 1.712 ...			$ lgAphDen : num 2.597 2.189 0.796 1.376 1.712 ...			$ lgAphDen : num 2.597 2.189 0.796 1.376 1.712 ...			$ lgAphDen : num 2.597 2.189 0.796 1.376 1.712 ...			$ lgAphDen : num 2.597 2.189 0.796 1.376 1.712 ...			$ lgAphDen : num 2.597 2.189 0.796 1.376 1.712 ...			$ lgAphDen : num 2.597 2.189 0.796 1.376 1.712 ...			$ lgAphDen : num 2.597 2.189 0.796 1.376 1.712 ...			$ lgAphDen : num 2.597 2.189 0.796 1.376 1.712 ...			Random effects:						Random effects:
	$ Aervi : num 34.5 26 0.5 1.25 2.5 ...			$ Aervi : num 34.5 26 0.5 1.25 2.5 ...			$ Aervi : num 34.5 26 0.5 1.25 2.5 ...			$ Aervi : num 34.5 26 0.5 1.25 2.5 ...			$ Aervi : num 34.5 26 0.5 1.25 2.5 ...			$ Aervi : num 34.5 26 0.5 1.25 2.5 ...			$ Aervi : num 34.5 26 0.5 1.25 2.5 ...			$ Aervi : num 34.5 26 0.5 1.25 2.5 ...			$ Aervi : num 34.5 26 0.5 1.25 2.5 ...			Groups Name Variance Std.Dev.			Random effects:			Groups Name Variance Std.Dev.			Random effects:
	$ lgAervi : num 1.539 1.417 -0.222 0.13 0.415 ...			$ lgAervi : num 1.539 1.417 -0.222 0.13 0.415 ...			$ lgAervi : num 1.539 1.417 -0.222 0.13 0.415 ...			$ lgAervi : num 1.539 1.417 -0.222 0.13 0.415 ...			$ lgAervi : num 1.539 1.417 -0.222 0.13 0.415 ...			$ lgAervi : num 1.539 1.417 -0.222 0.13 0.415 ...			$ lgAervi : num 1.539 1.417 -0.222 0.13 0.415 ...			$ lgAervi : num 1.539 1.417 -0.222 0.13 0.415 ...			$ lgAervi : num 1.539 1.417 -0.222 0.13 0.415 ...			fField (Intercept) 0.1036 0.3218			Groups Name Variance Std.Dev.			fField (Intercept) 0.05268 0.2295			Groups Name Variance Std.Dev.
	$ LeafHop : num 0 5.25 0.75 51.5 120.25 ...			$ LeafHop : num 0 5.25 0.75 51.5 120.25 ...			$ LeafHop : num 0 5.25 0.75 51.5 120.25 ...			$ LeafHop : num 0 5.25 0.75 51.5 120.25 ...			$ LeafHop : num 0 5.25 0.75 51.5 120.25 ...			$ LeafHop : num 0 5.25 0.75 51.5 120.25 ...			$ LeafHop : num 0 5.25 0.75 51.5 120.25 ...			$ LeafHop : num 0 5.25 0.75 51.5 120.25 ...			$ LeafHop : num 0 5.25 0.75 51.5 120.25 ...			Number of obs: 76, groups: fField, 6			fField (Intercept) 0.05753 0.2398			Number of obs: 76, groups: fField, 6			fField (Intercept) 0 0
	$ lgLeafHop : num -1 0.7284 -0.0706 1.7126 2.0804 ...			$ lgLeafHop : num -1 0.7284 -0.0706 1.7126 2.0804 ...			$ lgLeafHop : num -1 0.7284 -0.0706 1.7126 2.0804 ...			$ lgLeafHop : num -1 0.7284 -0.0706 1.7126 2.0804 ...			$ lgLeafHop : num -1 0.7284 -0.0706 1.7126 2.0804 ...			$ lgLeafHop : num -1 0.7284 -0.0706 1.7126 2.0804 ...			$ lgLeafHop : num -1 0.7284 -0.0706 1.7126 2.0804 ...			$ lgLeafHop : num -1 0.7284 -0.0706 1.7126 2.0804 ...			$ lgLeafHop : num -1 0.7284 -0.0706 1.7126 2.0804 ...						Number of obs: 76, groups: fField, 6						Number of obs: 76, groups: fField, 6
	$ Coccin : num 1.17 0 1 1 1.75 ...			$ Coccin : num 1.17 0 1 1 1.75 ...			$ Coccin : num 1.17 0 1 1 1.75 ...			$ Coccin : num 1.17 0 1 1 1.75 ...			$ Coccin : num 1.17 0 1 1 1.75 ...			$ Coccin : num 1.17 0 1 1 1.75 ...			$ Coccin : num 1.17 0 1 1 1.75 ...			$ Coccin : num 1.17 0 1 1 1.75 ...			$ Coccin : num 1.17 0 1 1 1.75 ...			Fixed effects:						Fixed effects:
	$ lgCoccin : num 0.1027 -1 0.0414 0.0414 0.2672 ...			$ lgCoccin : num 0.1027 -1 0.0414 0.0414 0.2672 ...			$ lgCoccin : num 0.1027 -1 0.0414 0.0414 0.2672 ...			$ lgCoccin : num 0.1027 -1 0.0414 0.0414 0.2672 ...			$ lgCoccin : num 0.1027 -1 0.0414 0.0414 0.2672 ...			$ lgCoccin : num 0.1027 -1 0.0414 0.0414 0.2672 ...			$ lgCoccin : num 0.1027 -1 0.0414 0.0414 0.2672 ...			$ lgCoccin : num 0.1027 -1 0.0414 0.0414 0.2672 ...			$ lgCoccin : num 0.1027 -1 0.0414 0.0414 0.2672 ...			Estimate Std. Error z value Pr(>|z|)			Fixed effects:			Estimate Std. Error z value Pr(>|z|)			Fixed effects:
	$ Psurv : num 0.15 0.025 0.386 0.5 0.64 ...			$ Psurv : num 0.15 0.025 0.386 0.5 0.64 ...			$ Psurv : num 0.15 0.025 0.386 0.5 0.64 ...			$ Psurv : num 0.15 0.025 0.386 0.5 0.64 ...			$ Psurv : num 0.15 0.025 0.386 0.5 0.64 ...			$ Psurv : num 0.15 0.025 0.386 0.5 0.64 ...			$ Psurv : num 0.15 0.025 0.386 0.5 0.64 ...			$ Psurv : num 0.15 0.025 0.386 0.5 0.64 ...			$ Psurv : num 0.15 0.025 0.386 0.5 0.64 ...			(Intercept) -1.668274 0.246662 -6.763 1.35e-11 ***			Estimate Std. Error z value Pr(>|z|)			(Intercept) -2.4141 0.2868 -8.419 <2e-16 ***			Estimate Std. Error z value Pr(>|z|)
	$ Paervi : num 0.45 0.3 0.295 0.267 0.2 ...			$ Paervi : num 0.45 0.3 0.295 0.267 0.2 ...			$ Paervi : num 0.45 0.3 0.295 0.267 0.2 ...			$ Paervi : num 0.45 0.3 0.295 0.267 0.2 ...			$ Paervi : num 0.45 0.3 0.295 0.267 0.2 ...			$ Paervi : num 0.45 0.3 0.295 0.267 0.2 ...			$ Paervi : num 0.45 0.3 0.295 0.267 0.2 ...			$ Paervi : num 0.45 0.3 0.295 0.267 0.2 ...			$ Paervi : num 0.45 0.3 0.295 0.267 0.2 ...			fPeriod2 -0.231018 0.334244 -0.691 0.489460			(Intercept) -3.23045 0.62779 -5.146 2.67e-07 ***			fPeriod2 -0.6457 0.4982 -1.296 0.1950			(Intercept) -5.19548 0.99285 -5.233 1.67e-07 ***
	$ Ppandora : num 0.125 0.175 0.2955 0.0667 0 ...			$ Ppandora : num 0.125 0.175 0.2955 0.0667 0 ...			$ Ppandora : num 0.125 0.175 0.2955 0.0667 0 ...			$ Ppandora : num 0.125 0.175 0.2955 0.0667 0 ...			$ Ppandora : num 0.125 0.175 0.2955 0.0667 0 ...			$ Ppandora : num 0.125 0.175 0.2955 0.0667 0 ...			$ Ppandora : num 0.125 0.175 0.2955 0.0667 0 ...			$ Ppandora : num 0.125 0.175 0.2955 0.0667 0 ...			$ Ppandora : num 0.125 0.175 0.2955 0.0667 0 ...			fPeriod3 -1.019568 0.402888 -2.531 0.011385 *			stdmaTA -0.16792 0.24504 -0.685 0.4932			fPeriod3 -1.8393 0.7610 -2.417 0.0156 *			stdmaTA -0.37671 0.39015 -0.966 0.3343
	$ total.n : int 39 20 23 23 24 24 24 24 24 10 ...			$ total.n : int 39 20 23 23 24 24 24 24 24 10 ...			$ total.n : int 39 20 23 23 24 24 24 24 24 10 ...			$ total.n : int 39 20 23 23 24 24 24 24 24 10 ...			$ total.n : int 39 20 23 23 24 24 24 24 24 10 ...			$ total.n : int 39 20 23 23 24 24 24 24 24 10 ...			$ total.n : int 39 20 23 23 24 24 24 24 24 10 ...			$ total.n : int 39 20 23 23 24 24 24 24 24 10 ...			$ total.n : int 39 20 23 23 24 24 24 24 24 10 ...			fPeriod4 -1.463154 0.466199 -3.138 0.001698 **			stdmaVap -0.24493 0.13999 -1.750 0.0802 .			fPeriod4 -1.4207 0.6427 -2.211 0.0271 *			stdmaVap -0.08090 0.23948 -0.338 0.7355
	$ nRegposHdneg : int 3 1 1 1 1 0 2 3 2 0 ...			$ nRegposHdneg : int 3 1 1 1 1 0 2 3 2 0 ...			$ nRegposHdneg : int 3 1 1 1 1 0 2 3 2 0 ...			$ nRegposHdneg : int 3 1 1 1 1 0 2 3 2 0 ...			$ nRegposHdneg : int 3 1 1 1 1 0 2 3 2 0 ...			$ nRegposHdneg : int 3 1 1 1 1 0 2 3 2 0 ...			$ nRegposHdneg : int 3 1 1 1 1 0 2 3 2 0 ...			$ nRegposHdneg : int 3 1 1 1 1 0 2 3 2 0 ...			$ nRegposHdneg : int 3 1 1 1 1 0 2 3 2 0 ...			fPeriod5 0.732306 0.311090 2.354 0.018572 *			lgWingAph -0.03418 0.13614 -0.251 0.8017			fPeriod5 -0.9389 0.5760 -1.630 0.1031			lgWingAph 0.03940 0.24725 0.159 0.8734
	$ nSerposRklaneg: int 1 1 0 1 0 0 0 0 0 0 ...			$ nSerposRklaneg: int 1 1 0 1 0 0 0 0 0 0 ...			$ nSerposRklaneg: int 1 1 0 1 0 0 0 0 0 0 ...			$ nSerposRklaneg: int 1 1 0 1 0 0 0 0 0 0 ...			$ nSerposRklaneg: int 1 1 0 1 0 0 0 0 0 0 ...			$ nSerposRklaneg: int 1 1 0 1 0 0 0 0 0 0 ...			$ nSerposRklaneg: int 1 1 0 1 0 0 0 0 0 0 ...			$ nSerposRklaneg: int 1 1 0 1 0 0 0 0 0 0 ...			$ nSerposRklaneg: int 1 1 0 1 0 0 0 0 0 0 ...			fPeriod6 0.001125 0.337861 0.003 0.997343			lgAphDen 0.24726 0.15522 1.593 0.1112			fPeriod6 -1.2795 0.6475 -1.976 0.0482 *			lgAphDen 0.53610 0.26535 2.020 0.0433 *
	$ nRickposHDneg : int 0 0 2 5 1 2 0 0 0 0 ...			$ nRickposHDneg : int 0 0 2 5 1 2 0 0 0 0 ...			$ nRickposHDneg : int 0 0 2 5 1 2 0 0 0 0 ...			$ nRickposHDneg : int 0 0 2 5 1 2 0 0 0 0 ...			$ nRickposHDneg : int 0 0 2 5 1 2 0 0 0 0 ...			$ nRickposHDneg : int 0 0 2 5 1 2 0 0 0 0 ...			$ nRickposHDneg : int 0 0 2 5 1 2 0 0 0 0 ...			$ nRickposHDneg : int 0 0 2 5 1 2 0 0 0 0 ...			$ nRickposHDneg : int 0 0 2 5 1 2 0 0 0 0 ...			fPeriod7 -1.847607 0.547982 -3.372 0.000747 ***			lgAervi 0.05572 0.18642 0.299 0.7650			fPeriod7 -0.8895 0.5293 -1.681 0.0928 .			lgAervi -0.45459 0.30705 -1.481 0.1387
	$ nHdposRklaneg : int 10 6 12 8 1 7 14 11 17 4 ...			$ nHdposRklaneg : int 10 6 12 8 1 7 14 11 17 4 ...			$ nHdposRklaneg : int 10 6 12 8 1 7 14 11 17 4 ...			$ nHdposRklaneg : int 10 6 12 8 1 7 14 11 17 4 ...			$ nHdposRklaneg : int 10 6 12 8 1 7 14 11 17 4 ...			$ nHdposRklaneg : int 10 6 12 8 1 7 14 11 17 4 ...			$ nHdposRklaneg : int 10 6 12 8 1 7 14 11 17 4 ...			$ nHdposRklaneg : int 10 6 12 8 1 7 14 11 17 4 ...			$ nHdposRklaneg : int 10 6 12 8 1 7 14 11 17 4 ...			fPeriod8 -1.053343 0.559360 -1.883 0.059684 .			lgLeafHop -0.10472 0.13031 -0.804 0.4216			fPeriod8 0.0938 0.5113 0.183 0.8544			lgLeafHop 0.24719 0.23799 1.039 0.2990
	$ nRegpos : int 3 3 1 1 2 0 5 5 3 0 ...			$ nRegpos : int 3 3 1 1 2 0 5 5 3 0 ...			$ nRegpos : int 3 3 1 1 2 0 5 5 3 0 ...			$ nRegpos : int 3 3 1 1 2 0 5 5 3 0 ...			$ nRegpos : int 3 3 1 1 2 0 5 5 3 0 ...			$ nHdposRickneg : int 10 4 9 6 4 6 15 7 14 4 ...			$ nHdposRickneg : int 10 4 9 6 4 6 15 7 14 4 ...			$ nHdposRickneg : int 10 4 9 6 4 6 15 7 14 4 ...			$ nHdposRickneg : int 10 4 9 6 4 6 15 7 14 4 ...			fPeriod9 -1.556389 0.553292 -2.813 0.004909 **			lgCoccin -0.08984 0.19095 -0.470 0.6380			fPeriod9 -2.1625 1.0416 -2.076 0.0379 *			lgCoccin 1.74634 0.36905 4.732 2.22e-06 ***
	$ nRegneg : int 36 17 22 22 22 24 19 19 21 10 ...			$ nRegneg : int 36 17 22 22 22 24 19 19 21 10 ...			$ nRegneg : int 36 17 22 22 22 24 19 19 21 10 ...			$ nRegneg : int 36 17 22 22 22 24 19 19 21 10 ...			$ nRegneg : int 36 17 22 22 22 24 19 19 21 10 ...			$ nHdposXneg : int 11 6 13 8 4 9 15 11 14 4 ...			$ nHdposXneg : int 11 6 13 8 4 9 15 11 14 4 ...			$ nHdposXneg : int 11 6 13 8 4 9 15 11 14 4 ...			$ nHdposXneg : int 11 6 13 8 4 9 15 11 14 4 ...			fPeriod10 -0.966799 0.473415 -2.042 0.041134 *			Psurv 1.49001 0.59266 2.514 0.0119 *			fPeriod10 -1.3220 0.7672 -1.723 0.0849 .			Psurv 0.07241 0.99526 0.073 0.9420
	$ nSerpos : int 10 1 1 3 0 0 0 2 0 2 ...			$ nSerpos : int 10 1 1 3 0 0 0 2 0 2 ...			$ nSerpos : int 10 1 1 3 0 0 0 2 0 2 ...			$ nSerpos : int 10 1 1 3 0 0 0 2 0 2 ...			$ nSerpos : int 10 1 1 3 0 0 0 2 0 2 ...			$ nRegpos : int 3 3 1 1 2 0 5 5 3 0 ...			$ nRegpos : int 3 3 1 1 2 0 5 5 3 0 ...			$ nRegpos : int 3 3 1 1 2 0 5 5 3 0 ...			$ nRegpos : int 3 3 1 1 2 0 5 5 3 0 ...			fPeriod11 0.570008 0.312829 1.822 0.068439 .			Paervi 0.37127 0.77236 0.481 0.6307			fPeriod11 -1.5966 0.7628 -2.093 0.0363 *			Paervi 2.47351 1.26509 1.955 0.0506 .
	$ nSerneg : int 29 19 22 20 24 24 24 22 24 8 ...			$ nSerneg : int 29 19 22 20 24 24 24 22 24 8 ...			$ nSerneg : int 29 19 22 20 24 24 24 22 24 8 ...			$ nSerneg : int 29 19 22 20 24 24 24 22 24 8 ...			$ nSerneg : int 29 19 22 20 24 24 24 22 24 8 ...			$ nRegneg : int 36 17 22 22 22 24 19 19 21 10 ...			$ nRegneg : int 36 17 22 22 22 24 19 19 21 10 ...			$ nRegneg : int 36 17 22 22 22 24 19 19 21 10 ...			$ nRegneg : int 36 17 22 22 22 24 19 19 21 10 ...			fPeriod12 0.483930 0.293849 1.647 0.099585 .			Ppandora 0.02391 0.76229 0.031 0.9750			fPeriod12 -0.4127 0.4536 -0.910 0.3629			Ppandora 1.29627 1.13177 1.145 0.2521
	$ nRickpos : int 1 2 6 7 3 6 1 4 3 0 ...			$ nRickpos : int 1 2 6 7 3 6 1 4 3 0 ...			$ nRickpos : int 1 2 6 7 3 6 1 4 3 0 ...			$ nRickpos : int 1 2 6 7 3 6 1 4 3 0 ...			$ nRickpos : int 1 2 6 7 3 6 1 4 3 0 ...			$ nSerpos : int 10 1 1 3 0 0 0 2 0 2 ...			$ nSerpos : int 10 1 1 3 0 0 0 2 0 2 ...			$ nSerpos : int 10 1 1 3 0 0 0 2 0 2 ...			$ nSerpos : int 10 1 1 3 0 0 0 2 0 2 ...			fPeriod13 -1.056209 0.402614 -2.623 0.008706 **			---			fPeriod13 -0.5348 0.4730 -1.131 0.2582			---
	$ nRickneg : int 38 18 17 16 21 18 23 20 21 10 ...			$ nRickneg : int 38 18 17 16 21 18 23 20 21 10 ...			$ nRickneg : int 38 18 17 16 21 18 23 20 21 10 ...			$ nRickneg : int 38 18 17 16 21 18 23 20 21 10 ...			$ nRickneg : int 38 18 17 16 21 18 23 20 21 10 ...			$ nSerneg : int 29 19 22 20 24 24 24 22 24 8 ...			$ nSerneg : int 29 19 22 20 24 24 24 22 24 8 ...			$ nSerneg : int 29 19 22 20 24 24 24 22 24 8 ...			$ nSerneg : int 29 19 22 20 24 24 24 22 24 8 ...			fPeriod14 -0.675965 0.392922 -1.720 0.085368 .			Signif. codes: 0 ‘***’ 0.001 ‘**’ 0.01 ‘*’ 0.05 ‘.’ 0.1 ‘ ’ 1			fPeriod14 -1.2060 0.6451 -1.870 0.0615 .			Signif. codes: 0 ‘***’ 0.001 ‘**’ 0.01 ‘*’ 0.05 ‘.’ 0.1 ‘ ’ 1
	$ nHdpos : int 11 6 13 8 6 10 16 11 17 4 ...			$ nHdpos : int 11 6 13 8 6 10 16 11 17 4 ...			$ nHdpos : int 11 6 13 8 6 10 16 11 17 4 ...			$ nHdpos : int 11 6 13 8 6 10 16 11 17 4 ...			$ nHdpos : int 11 6 13 8 6 10 16 11 17 4 ...			$ nRickpos : int 1 2 6 7 3 6 1 4 3 0 ...			$ nRickpos : int 1 2 6 7 3 6 1 4 3 0 ...			$ nRickpos : int 1 2 6 7 3 6 1 4 3 0 ...			$ nRickpos : int 1 2 6 7 3 6 1 4 3 0 ...			---						---
	$ nHdneg : int 28 14 10 15 18 14 8 13 7 6 ...			$ nHdneg : int 28 14 10 15 18 14 8 13 7 6 ...			$ nHdneg : int 28 14 10 15 18 14 8 13 7 6 ...			$ nHdneg : int 28 14 10 15 18 14 8 13 7 6 ...			$ nHdneg : int 28 14 10 15 18 14 8 13 7 6 ...			$ nRickneg : int 38 18 17 16 21 18 23 20 21 10 ...			$ nRickneg : int 38 18 17 16 21 18 23 20 21 10 ...			$ nRickneg : int 38 18 17 16 21 18 23 20 21 10 ...			$ nRickneg : int 38 18 17 16 21 18 23 20 21 10 ...			Signif. codes: 0 ‘***’ 0.001 ‘**’ 0.01 ‘*’ 0.05 ‘.’ 0.1 ‘ ’ 1			Correlation of Fixed Effects:			Signif. codes: 0 ‘***’ 0.001 ‘**’ 0.01 ‘*’ 0.05 ‘.’ 0.1 ‘ ’ 1			Correlation of Fixed Effects:
	$ nHd.Rklapos : int 1 0 1 0 5 3 2 0 0 0 ...			$ nHd.Rklapos : int 1 0 1 0 5 3 2 0 0 0 ...			$ nHd.Rklapos : int 1 0 1 0 5 3 2 0 0 0 ...			$ nHd.Rklapos : int 1 0 1 0 5 3 2 0 0 0 ...			$ nHd.Rklapos : int 1 0 1 0 5 3 2 0 0 0 ...			$ nHdpos : int 11 6 13 8 6 10 16 11 17 4 ...			$ nHdpos : int 11 6 13 8 6 10 16 11 17 4 ...			$ nHdpos : int 11 6 13 8 6 10 16 11 17 4 ...			$ nHdpos : int 11 6 13 8 6 10 16 11 17 4 ...						(Intr) stdmTA stdmVp lgWngA lgAphD lgAerv lgLfHp lgCccn Psurv Paervi						(Intr) stdmTA stdmVp lgWngA lgAphD lgAerv lgLfHp lgCccn Psurv Paervi
	> DataforGlm$fField <- factor(DataforGlm$Field)			> DataforGlm$fField <- factor(DataforGlm$Field)			> DataforGlm$fField <- factor(DataforGlm$Field)			> DataforGlm$fField <- factor(DataforGlm$Field)			> DataforGlm$fField <- factor(DataforGlm$Field)			$ nHdneg : int 28 14 10 15 18 14 8 13 7 6 ...			$ nHdneg : int 28 14 10 15 18 14 8 13 7 6 ...			$ nHdneg : int 28 14 10 15 18 14 8 13 7 6 ...			$ nHdneg : int 28 14 10 15 18 14 8 13 7 6 ...			RklaRXPeriod <- update(RklaRemPeriod, .~. -fPeriod)			stdmaTA -0.203			Correlation matrix not shown by default, as p = 14 > 12.			stdmaTA -0.116
	> DataforGlm$fPeriod <- factor(DataforGlm$Period)			> DataforGlm$fPeriod <- factor(DataforGlm$Period)			> DataforGlm$fPeriod <- factor(DataforGlm$Period)			> DataforGlm$fPeriod <- factor(DataforGlm$Period)			> DataforGlm$fPeriod <- factor(DataforGlm$Period)			$ nHd.Rklapos : int 1 0 1 0 5 3 2 0 0 0 ...			$ nHd.Rklapos : int 1 0 1 0 5 3 2 0 0 0 ...			$ nHd.Rklapos : int 1 0 1 0 5 3 2 0 0 0 ...			$ nHd.Rklapos : int 1 0 1 0 5 3 2 0 0 0 ...						stdmaVap 0.026 -0.554			Use print(x, correlation=TRUE) or			stdmaVap 0.065 -0.524
	> #period analysis for Reg without Ham#			> RegnoH = glmer(cbind(nRegposHdneg,nRegneg)~stdmaTA+stdmaVap+lgWingAph+lgAphDen+lgAervi+lgLeafHop+lgCoccin+Psurv+Paervi+Ppandora+ (1|fField), family = binomial, data = DataforGlm)			> RicknoHPeriod <- glmer(cbind(nRickposHDneg,nRickneg)~fPeriod + (1|fField), family=binomial, data=DataforGlm)			> SernoRPeriod <- glmer(cbind(nSerposRklaneg,nSerneg)~fPeriod + (1|fField), family=binomial, data=DataforGlm)			> SernoRkla = glmer(cbind(nSerposRklaneg,nSerneg)~stdmaTA+stdmaVap+lgWingAph+lgAphDen+lgAervi+lgLeafHop+lgCoccin+Psurv+Paervi+Ppandora+ (1|fField), family = binomial, data = DataforGlm)			$ nHd.Rickpos : int 1 2 4 2 2 4 1 4 3 0 ...			$ nHd.Rickpos : int 1 2 4 2 2 4 1 4 3 0 ...			$ nHd.Rickpos : int 1 2 4 2 2 4 1 4 3 0 ...			$ nHd.Rickpos : int 1 2 4 2 2 4 1 4 3 0 ...			anova(RklaRemPeriod, RklaRXPeriod)			lgWingAph 0.559 -0.315 -0.077			vcov(x) if you need it			lgWingAph 0.436 -0.259 -0.146
	> RegnoHPeriod <- glmer(cbind(nRegposHdneg,nRegneg)~fPeriod + (1|fField), family=binomial, data=DataforGlm)			boundary (singular) fit: see ?isSingular			> summary(RicknoHPeriod)			boundary (singular) fit: see ?isSingular			boundary (singular) fit: see ?isSingular			$ nHd.Xpos : int 0 0 0 0 2 1 1 0 3 0 ...			$ nHd.Xpos : int 0 0 0 0 2 1 1 0 3 0 ...			$ nHd.Xpos : int 0 0 0 0 2 1 1 0 3 0 ...			$ nHd.Xpos : int 0 0 0 0 2 1 1 0 3 0 ...			Data: RemovedCoinfection			lgAphDen -0.646 0.169 0.070 -0.333						lgAphDen -0.615 0.093 0.010 -0.165
	boundary (singular) fit: see ?isSingular			> summary(RegnoH)			Generalized linear mixed model fit by maximum likelihood (Laplace Approximation) ['glmerMod']			> summary(SernoRPeriod)			> summary(SernoRkla)			> DataforGlm$fField <- factor(DataforGlm$Field)			> DataforGlm$fField <- factor(DataforGlm$Field)			> DataforGlm$fField <- factor(DataforGlm$Field)			> DataforGlm$fField <- factor(DataforGlm$Field)			Models:			lgAervi 0.072 0.300 -0.470 0.122 -0.278			optimizer (Nelder_Mead) convergence code: 0 (OK)			lgAervi 0.096 0.338 -0.397 0.095 -0.212
	> summary(RegnoHPeriod)			Generalized linear mixed model fit by maximum likelihood (Laplace Approximation) ['glmerMod']			Family: binomial ( logit )			Generalized linear mixed model fit by maximum likelihood (Laplace Approximation) ['glmerMod']			Generalized linear mixed model fit by maximum likelihood (Laplace Approximation) ['glmerMod']			> DataforGlm$fPeriod <- factor(DataforGlm$Period)			> DataforGlm$fPeriod <- factor(DataforGlm$Period)			> DataforGlm$fPeriod <- factor(DataforGlm$Period)			> DataforGlm$fPeriod <- factor(DataforGlm$Period)			RklaRXPeriod: cbind(RklaHD, nRklaneg) ~ (1 | fField)			lgLeafHop 0.001 -0.418 0.057 0.226 0.181 0.026			Model failed to converge with max|grad| = 0.00378848 (tol = 0.002, component 1)			lgLeafHop -0.069 -0.477 -0.004 0.246 0.214 0.119
	Generalized linear mixed model fit by maximum likelihood (Laplace Approximation) ['glmerMod']			Family: binomial ( logit )			Formula: cbind(nRickposHDneg, nRickneg) ~ fPeriod + (1 | fField)			Family: binomial ( logit )			Family: binomial ( logit )						> HdnoRkla = glmer(cbind(nHdposRklaneg,nHdneg)~stdmaTA+stdmaVap+lgWingAph+lgAphDen+lgAervi+lgLeafHop+lgCoccin+Psurv+Paervi+Ppandora+ (1|fField), family = binomial, data = DataforGlm)			> #period analysis for Ham without Rick#			> HdnoRick = glmer(cbind(nHdposRickneg,nHdneg)~stdmaTA+stdmaVap+lgWingAph+lgAphDen+lgAervi+lgLeafHop+lgCoccin+Psurv+Paervi+Ppandora+ (1|fField), family = binomial, data = DataforGlm)			RklaRemPeriod: cbind(RklaHD, nRklaneg) ~ fPeriod + (1 | fField)			lgCoccin 0.297 -0.122 -0.071 0.299 -0.380 0.087 0.059						lgCoccin -0.061 -0.118 -0.232 0.349 -0.149 0.009 0.209
	Family: binomial ( logit )			Formula: cbind(nRegposHdneg, nRegneg) ~ stdmaTA + stdmaVap + lgWingAph +			Data: DataforGlm			Formula: cbind(nSerposRklaneg, nSerneg) ~ fPeriod + (1 | fField)			Formula: cbind(nSerposRklaneg, nSerneg) ~ stdmaTA + stdmaVap + lgWingAph +			> HdnoRklaPeriod <- glmer(cbind(nHdposRklaneg,nHdneg)~fPeriod + (1|fField), family=binomial, data=DataforGlm)			> summary(HdnoRkla)			> HdnoRickPeriod <- glmer(cbind(nHdposRickneg,nHdneg)~fPeriod + (1|fField), family=binomial, data=DataforGlm)			> summary(HdnoRick)			npar AIC BIC logLik deviance Chisq Df Pr(>Chisq)			Psurv -0.582 -0.138 -0.019 -0.032 -0.004 0.184 -0.236 -0.054			SpiRXPeriod <- update(SpiRemPeriod, .~. -fPeriod)			Psurv -0.539 -0.086 -0.076 0.049 -0.062 0.124 -0.249 0.133
	Formula: cbind(nRegposHdneg, nRegneg) ~ fPeriod + (1 | fField)			lgAphDen + lgAervi + lgLeafHop + lgCoccin + Psurv + Paervi + Ppandora + (1 | fField)						Data: DataforGlm			lgAphDen + lgAervi + lgLeafHop + lgCoccin + Psurv + Paervi + Ppandora + (1 | fField)			> summary(HdnoRklaPeriod)			Generalized linear mixed model fit by maximum likelihood (Laplace Approximation) ['glmerMod']			> summary(HdnoRickPeriod)			Generalized linear mixed model fit by maximum likelihood (Laplace Approximation) ['glmerMod']			RklaRXPeriod 2 375.05 379.71 -185.52 371.05	AIC is lower in model with period included - period is significant		Paervi -0.493 0.416 -0.268 -0.060 0.121 -0.179 -0.187 0.061 0.370						Paervi -0.492 0.319 -0.318 0.073 0.043 -0.214 -0.131 0.327 0.422
	Data: DataforGlm			Data: DataforGlm			AIC BIC logLik deviance df.resid						Data: DataforGlm			Generalized linear mixed model fit by maximum likelihood (Laplace Approximation) ['glmerMod']			Family: binomial ( logit )			Generalized linear mixed model fit by maximum likelihood (Laplace Approximation) ['glmerMod']			Family: binomial ( logit )			RklaRemPeriod 15 303.15 338.11 -136.57 273.15 97.899 13 4.232e-15 ***						anova(SpiRemPeriod, SpiRXPeriod)			Ppandora -0.703 0.347 -0.035 -0.247 0.173 -0.080 -0.206 0.092 0.528 0.716
							263.3 298.3 -116.7 233.3 61			AIC BIC logLik deviance df.resid						Family: binomial ( logit )			Formula: cbind(nHdposRklaneg, nHdneg) ~ stdmaTA + stdmaVap + lgWingAph +			Family: binomial ( logit )			Formula: cbind(nHdposRickneg, nHdneg) ~ stdmaTA + stdmaVap + lgWingAph + lgAphDen + lgAervi + lgLeafHop + lgCoccin + Psurv + Paervi + Ppandora + (1 | fField)			---			drop1(RklaRem)			Data: RemovedCoinfection			optimizer (Nelder_Mead) convergence code: 0 (OK)
	AIC BIC logLik deviance df.resid			AIC BIC logLik deviance df.resid						148.3 183.3 -59.2 118.3 61			AIC BIC logLik deviance df.resid			Formula: cbind(nHdposRklaneg, nHdneg) ~ fPeriod + (1 | fField)			lgAphDen + lgAervi + lgLeafHop + lgCoccin + Psurv + Paervi + Ppandora + (1 | fField)			Formula: cbind(nHdposRickneg, nHdneg) ~ fPeriod + (1 | fField)			Data: DataforGlm			Signif. codes: 0 ‘***’ 0.001 ‘**’ 0.01 ‘*’ 0.05 ‘.’ 0.1 ‘ ’ 1			Single term deletions			Models:			boundary (singular) fit: see ?isSingular
	292 327 -131 262 61			297.6 325.6 -136.8 273.6 64			Scaled residuals:						161.6 189.6 -68.8 137.6 64			Data: DataforGlm			Data: DataforGlm			Data: DataforGlm												SpiRXPeriod: cbind(SpiHD, nSpineg) ~ (1 | fField)
							Min 1Q Median 3Q Max			Scaled residuals:															AIC BIC logLik deviance df.resid						Model:			SpiRemPeriod: cbind(SpiHD, nSpineg) ~ fPeriod + (1 | fField)			drop1(SpiRem)
	Scaled residuals:			Scaled residuals:			-1.69896 -0.94191 -0.03056 0.69544 2.63317			Min 1Q Median 3Q Max			Scaled residuals:			AIC BIC logLik deviance df.resid			AIC BIC logLik deviance df.resid			AIC BIC logLik deviance df.resid			401.6 429.6 -188.8 377.6 64						cbind(RklaHD, nRklaneg) ~ stdmaTA + stdmaVap + lgWingAph + lgAphDen +			npar AIC BIC logLik deviance Chisq Df Pr(>Chisq)			Single term deletions
[truncated: 376 more rows]

## Sheet: Table S7-stats 2wkFrqShf Htchhk
Table S7: Statistics on 2-week frequency shifts during 2012 longitudinal study, with an assessment of hitchhiking effects
										evidence for hitchhiking - event #1						evidence for hitchhiking - event #1												evidence for hitchhiking - event #2						evidence for hitchhiking - event #2
[truncated: 50 more rows]

## Sheet: Table S8-statsFig4Fig5
Table S8: Statistics on 2-week and overwintering symbiont frequency shifts for deconstructed (co-)infection contexts – used to generate p-values for assessments of change over time in Figures 4 & 5 and, hence, for formal comparisons with the patterns in Figure 1
[truncated: 48 more rows]

[truncated: 3 more sheets: Table S9-2012FinalEnvModels, Table S10-APrioriHyps,StatsSmry, Table S11 - microsat data]
